# Supplementary material for: Reprogramming Methods Do Not Affect Gene Expression Profile of Human Induced Pluripotent Stem Cells
Source: Int J Mol Sci. 2017 Jan 20;18(1):206. doi: 10.3390/ijms18010206 (PMC5297836; doi:10.3390/ijms18010206)
Supplement: Supplementary file 1 [file ijms-18-00206-s001.txt]

Table S1. Normalized data vs median of all samples.
ProbeName	Ep12 p7.txt:gProcessedSignal	Ep8 p7.txt:gProcessedSignal	R4 p6.txt:gProcessedSignal	S5 p6.txt:gProcessedSignal	BJ p7.txt:gProcessedSignal	Ep4 p7.txt:gProcessedSignal	R3 p8.txt:gProcessedSignal	S6 p8.txt:gProcessedSignal	Ep7 p8.txt:gProcessedSignal	R5 p5.txt:gProcessedSignal	S4 p7.txt:gProcessedSignal	S8 p8.txt:gProcessedSignal	Bjp7.txt:gProcessedSignal	Ep11p5.txt:gProcessedSignal	R1p9.txt:gProcessedSignal	S7p9.txt:gProcessedSignal
GE_BrightCorner	0.8140125	-0.50819683	0.015050888	0.4909134	0.54226875	-1.8170757	-1.4812403	0.3187809	-1.0431805	-1.0349894	0.80110073	-0.015050888	-0.6057806	0.943697	-2.5964775	0.226614
DarkCorner	0.27712917	-0.04772663	0.35857773	0.19113445	-0.5743942	-0.022829056	-0.17791939	-0.20426178	-0.6492157	-0.056009293	-0.4583254	0.02283001	0.97136974	0.8237529	0.7003422	0.40493584
A_24_P66027	0.9102516	0.6474199	0.050232887	1.0113363	-3.0244708	-0.5137367	-0.37595844	-0.48757267	-0.44676685	0.10641575	-0.4881401	0.7722931	-1.7931452	0.89152336	0.38535213	-0.050232887
A_32_P77178	0.67941785	0.012612104	-0.012612104	1.6257112	-0.34690356	-0.3912952	-1.1023681	-1.147948	-1.2397878	-0.5756576	0.26369214	0.11519933	0.35739303	0.26749063	-1.1976521	1.9225376
A_23_P212522	-0.57739305	0.06743765	-0.46661234	-0.23909712	1.4808822	0.035184383	-0.01812601	-0.30298948	0.07153273	-0.3182807	-0.43297052	0.19244719	1.2301154	-0.16751528	0.01812601	0.23669958
A_24_P934473	0.9094515	-0.71175337	-0.6022339	0.28351784	0.85401964	-1.3985882	-0.57620287	0.30542946	0.068493366	-1.518281	0.23465586	-1.4313107	1.453413	-0.068493366	-0.56798935	1.020503
A_24_P9671	-0.14645338	-0.2517171	-0.40652704	-0.42748976	-1.3622928	0.5077815	0.67576265	0.33733416	0.19975328	0.19178152	0.3308053	-0.008700848	-0.61705446	0.112139225	-0.00844717	0.00844717
A_32_P29551	0.2042818	0.1498127	0.6561675	1.2410192	-2.8988605	-0.8590107	-1.1411448	1.4926648	-0.87789726	0.043647766	-0.043647766	0.5637493	-0.6724806	0.2956953	-0.33544493	-0.16687918
A_24_P801451	1.0687466	0.24593735	-0.47028828	1.0446587	-0.89990425	0.40367985	0.55106735	-0.11641693	0.7095127	-0.25221634	-0.48189926	-1.2012072	-1.7304702	-0.08337116	0.13800621	0.08337116
A_32_P30710	-0.03836155	-0.5948334	0.18738842	-0.33408833	-1.6130638	-0.14970398	0.10127926	0.03836155	-0.24111271	0.054255486	-0.45799065	-0.043780327	0.07302189	0.10115147	0.25345325	0.23202801
A_32_P89523	-0.04169464	-0.24114323	0.3887043	0.29945803	-0.705883	0.13315105	-0.13433981	-0.55011797	-1.1868539	0.041695118	0.13110447	-0.54828215	1.1207428	1.0359311	0.15801287	-0.06189537
A_24_P704878	-0.463686	-0.019749165	-0.1923585	-0.6658325	0.019749641	1.0223861	1.0583844	1.079597	-1.3206244	-1.3395939	-0.90982676	-1.3185139	0.79094744	1.5889549	1.2052569	1.0564528
A_32_P86028	-0.09691572	-0.48592234	0.1177783	-0.2905345	-0.5909629	0.27494192	0.20187426	0.041574955	-0.13248587	0.08165026	0.012143612	0.34944773	-0.35515642	-0.012143612	0.15439272	-0.30127287
A_24_P470079	-0.2260828	2.0108008	1.0637197	0.5920663	0.13300419	0.41155767	-0.13300371	-0.6298361	0.44829226	-0.90006065	-0.42342043	-2.5320063	1.2922392	-0.5336294	-0.53061867	0.7523942
A_23_P65830	0.033662796	0.08238697	-0.22633553	0.0432415	0.015329361	-0.12544537	-0.20320225	-0.23608589	0.066477776	-0.2759905	-0.015329361	-0.046606064	0.4335022	-0.16132736	0.22406101	0.20720291
A_23_P109143	-0.50293493	0.26065397	0.38945723	-0.31612253	2.9900136	0.27913332	0.26522303	-0.5181155	0.15481997	-0.48855925	-0.5326276	-0.47566938	3.3962998	-0.28071165	-0.15481997	0.40180063
A_24_P595567	-1.0845537	-3.2920098	0.98096657	-1.1774836	-0.3567605	0.23245382	-0.2682042	0.2202158	-0.53109884	0.59914637	-0.70093584	0.98816824	0.5839095	-0.2202158	0.2911806	0.22746992
A_24_P391591	0.014558792	0.124631405	1.3318958	-0.16009855	3.006217	0.48425055	-0.042188644	1.6819067	0.38576126	-0.20837498	-0.4012785	-0.59885025	2.5491357	-0.6455908	-0.09771395	-0.014559269
A_24_P799245	0.25766373	-0.07658672	0.32162094	0.10309601	-0.54943943	-0.0045108795	-0.16388893	-0.20472431	-0.7060814	-0.07729149	-0.5340347	0.004509926	1.0659313	0.86678696	0.78282166	0.41741657
A_24_P932757	0.2581911	-0.07314491	0.32431602	0.16770744	-0.5529804	-0.0067567825	-0.16908741	-0.21098614	-0.7029276	-0.075556755	-0.5324106	0.0067567825	1.0623217	0.8621712	0.77740383	0.41159105
A_24_P835500	-1.0611954	-0.9116497	-0.24328613	-0.42442322	3.2051353	0.08516979	-0.20089054	0.19828987	-0.4723959	0.5301008	-0.5485058	0.2652607	4.4188604	0.5368414	1.1047306	-0.08516979
A_23_P54340	0.020531178	0.408082	0.39958715	-0.020531178	-1.8164978	0.363935	-0.06948471	0.05467081	0.71001196	0.25135756	-0.24692059	-0.14782476	-2.9363794	-0.16788244	-0.10759258	0.59959555
A_23_P67555	-0.07939577	0.14635324	0.46782637	-0.438622	-0.74628305	-0.015452862	0.015452862	-0.025138378	0.2224164	-0.2881484	-0.23734426	-0.42609453	0.39458036	0.29147768	0.08228731	0.89721155
A_24_P286412	1.9780445	-0.49823904	0.80361605	1.6664052	-0.19490671	-0.2488451	0.16454124	0.22059774	-0.3674779	-0.012794495	0.87776184	0.5461316	-1.0282569	-0.30354023	-0.4106617	0.012794018
A_24_P229084	0.12286472	-0.1946907	0.20066452	1.5041466	-0.7126188	1.0709786	-0.33416653	-0.38037014	-0.8255167	-0.20849133	-0.6623621	-0.12286472	0.9009514	0.69869995	0.60985184	0.24196243
A_23_P202696	0.28011084	1.0420556	-0.35465288	-0.11474657	-0.05491686	0.25499964	0.3835349	0.036718845	0.6910262	-0.036718845	-0.69793653	-0.8105798	0.09455919	-0.27327585	-0.41647005	0.34196424
A_24_P927716	0.26751328	-0.044641495	0.349638	0.12870121	-0.5793514	-0.022708893	-0.20206451	-0.249403	-0.6760359	-0.064517975	-0.5157833	0.022708893	1.033061	0.83053493	1.1367145	0.37130737
A_23_P124837	-0.15436172	-0.2914667	-0.44061422	0.43602657	4.4097347	0.590106	0.20581722	0.6648884	0.57860947	-0.32871485	-0.64565516	-0.81522846	3.043436	-0.5138645	0.15436172	-0.46980238
A_24_P329635	0.17995214	-0.3682971	1.0147986	-0.10645437	-0.78086805	0.38923502	-0.37679148	-0.28954744	0.5599551	0.11399126	-0.5448022	-0.1604867	0.09770632	-0.09770632	0.55618143	0.2848096
AT_D_3	0.24434185	-0.0173378	0.4234047	0.14813805	-0.23943329	0.0023593903	-0.15685368	-0.20711613	-0.34002304	-0.024811745	-0.5186796	-0.0023593903	0.9816971	0.8115597	0.7418761	0.31014824
A_23_P148439	-0.62745667	0.15770721	0.14216328	0.0068044662	-1.9668694	-0.04393196	-0.57433224	-1.2414904	-0.87244225	0.13330746	-1.0162287	-0.0068044662	0.47203064	1.2141619	0.76547337	0.3594904
A_23_P137931	0.27283287	-0.026507378	0.36591434	3.91792	-0.60676193	-0.040599823	-0.23008728	-0.2770939	-0.6594038	-0.06459808	-0.5065899	0.026507378	1.003025	0.80128	0.7079735	0.336277
A_23_P203819	-0.5642586	-0.59273434	0.11572838	-0.29258728	1.3681135	-0.26795864	-0.3493023	-0.009865761	-0.4579296	0.18289375	0.009865761	0.5429983	1.9153414	0.12213707	0.08998871	-0.34983444
A_32_P198868	-0.072197914	-0.36652374	0.025218487	-0.2046051	1.0563188	1.1412582	-0.23569298	-0.12256813	-0.79064846	0.29622698	0.63217115	-0.3203106	3.5155096	1.0880976	0.34742308	-0.025218964
A_24_P687	-0.74570704	0.3910632	-1.2144818	-0.32395935	1.2704606	0.9777856	0.36185408	0.31378508	1.4180436	-0.1668706	-0.45349646	-0.23586512	0.1668706	-0.49124622	-1.8136892	1.0177426
A_23_P253052	-0.12681293	-0.48994064	0.117388725	-0.2762537	2.3453627	0.08820343	-0.08820343	-0.09631252	0.38283157	0.67683697	-0.24851799	0.37562275	3.3224096	0.36520863	-0.107720375	-0.26572227
A_32_P139302	-0.18788052	-1.3750381	0.36145878	-0.8673444	0.62830734	-0.002679348	0.002679348	-0.11000538	-0.6186719	-0.12807465	0.6509862	0.25392914	2.0792723	0.32781363	1.2236061	-0.13224745
A_23_P201647	0.02146864	0.14995623	-0.7384753	0.12295675	-0.34173632	0.19044828	0.055532932	0.1487279	-0.02146864	-0.057737827	-0.15763807	0.032462597	-0.7721009	-0.033194065	0.045662403	-0.70583487
A_24_P350557	0.26904774	-0.01343441	0.37593746	0.1391964	-0.47599888	-0.07941151	-0.28284264	-0.32240582	-0.6496897	-0.08194065	-0.5072489	0.01343441	0.94361925	0.747097	0.6495905	0.27422047
A_23_P146584	-0.21233988	0.20625544	-0.5049386	-0.3534541	0.63959074	0.27146196	0.20536566	0.14853907	-0.035716534	0.124390125	-0.31579924	-0.051539898	0.7090039	-0.17898226	0.035716534	-0.54027987
A_24_P289607	-0.40147018	0.724205	0.76976395	-1.1242161	-1.9417973	-0.50234365	1.3249087	0.5442476	0.012688637	0.49471855	-0.79260445	0.28855896	-0.33697605	-0.5311508	-0.012689114	0.15662527
A_32_P54289	0.36427903	-0.27024436	0.7347615	0.76004386	-0.05357194	-1.0281322	-1.492315	0.12343526	-1.6073763	-2.149696	-0.23260522	-1.1552794	0.9315579	0.8365543	0.64188886	0.05357194
A_23_P77000	-0.36124468	0.10782957	-0.23704958	-0.0591712	0.014739513	0.53641176	-0.20260954	-0.1426282	0.9763484	0.9092498	-1.236897	0.1919446	0.3024001	0.3716216	-0.014739513	-0.13060236
A_23_P111020	0.31158733	0.19170618	-0.09404087	0.56378746	0.09404087	-0.36443138	-0.5688453	-0.73708105	-0.71422005	-0.9977126	-0.27529955	-1.2240028	0.2248249	0.54910374	0.17917776	0.25656652
A_32_P103558	-0.24818087	0.5103774	0.18363523	0.38144064	-4.820478	0.030596256	-0.40096903	-0.4308009	-0.030596256	0.5277715	-0.5240588	0.36016893	-5.116544	0.55523443	0.27012968	-0.054648876
A_32_P235289	0.07885599	-0.43232155	0.52898073	-0.46324158	-2.8284512	0.14480877	0.45252323	0.484828	0.4304843	-0.8335333	-0.07885647	-0.13329697	-0.6971426	0.84186745	-0.17668152	1.0234609
A_32_P22191	0.06719637	-0.9017749	0.39734125	0.47819948	-0.0031189919	-1.5853286	-1.3033452	-0.077961445	-1.2034116	-0.4923129	0.13274717	0.27317667	0.21238375	0.2370696	-0.3718648	0.0031189919
A_24_P253251	-0.42503738	0.49064445	-0.13224506	0.050411224	0.08577347	-0.23486996	0.052456856	-0.35283947	-0.24164295	-0.050411224	-0.36558342	0.21698093	0.21961784	0.16257095	0.14900684	-0.11465359
A_24_P52168	-0.3267169	0.031167507	-0.06493235	0.09813261	0.6168637	0.008482933	-0.87131166	-0.22575903	-0.008482933	-1.7094855	-1.0497656	-0.8811574	0.96041393	1.0744519	0.34146357	0.6815915
A_24_P530900	-0.5328815	0.8131559	0.07700896	1.7790067	0.18190646	0.044945	-0.13444877	-0.64576745	-0.044945	-0.5464437	-1.1893547	-0.77632594	0.14870477	-0.19839168	0.12993455	0.28178716
A_23_P391894	0.660316	0.48570585	0.06807089	-0.27525616	0.14513302	-0.4407735	-0.2272129	0.6695061	0.50628185	-1.8254147	0.21842337	-1.4064841	-0.07707405	-1.0764666	0.08913231	-0.068071365
A_24_P209571	-0.008250713	1.3566442	-0.46569777	-0.046200275	0.20924234	0.38469553	0.4894719	-0.006989002	0.5055051	-0.08875322	-0.15165949	-0.025215626	-0.5257058	0.006989002	0.30400229	0.049864292
A_24_P148907	0.0022583008	0.17098045	1.0611501	0.54055166	-0.77464294	1.0316062	-0.3592615	-0.233253	0.55201054	-0.86315393	-1.100224	-0.80134726	0.61965466	-0.002257824	1.9346833	-0.42329836
A_24_P6825	0.03203106	0.20239687	-0.2838335	0.46402597	-2.6210804	0.23159838	0.25984907	-0.03203106	0.27101946	-1.7160501	-0.98748875	-2.0673704	-1.665154	0.43868256	0.07164526	-0.13312912
A_23_P149281	0.6815467	-0.13488483	-0.5695405	1.0350223	-0.07412386	0.5946574	1.0555148	0.36150122	0.07412386	0.22643995	-0.13371325	-0.99168015	-0.54802847	-0.37209463	0.19268322	-1.3296084
A_23_P104098	0.17538595	0.38563395	0.2874422	0.46867895	-1.1408186	-0.52435875	-0.8634	-0.8810806	-0.3381076	-0.9880705	-0.14948225	-0.6438823	0.36501074	0.9223161	0.41280508	0.14948225
A_24_P151920	0.0058465004	0.14044905	0.11647463	-0.0058465004	-2.638039	-0.8506675	-0.44208574	-0.16048288	-0.31653547	0.04905653	0.29818296	0.13024569	-2.2274046	0.0336318	0.56579447	-0.31509924
A_24_P252223	1.330195	0.4633355	0.35288954	0.47809744	-0.64678764	0.15290308	-0.37244844	-0.5428152	-0.5422473	-0.52042675	0.18413019	-0.96768475	-0.18203545	0.7170539	0.56971884	-0.15290308
A_32_P141065	0.008990765	0.7491002	0.18753862	0.7655072	-0.6687689	-0.32515717	-1.1204591	-0.65371704	-0.008990765	-1.530663	-1.0881028	-0.95785236	0.39890623	1.0867682	0.681015	0.392838
A_23_P217015	0.95111036	0.41616583	0.111905575	1.0604138	-1.8281159	0.23100996	0.15948248	-0.3924384	-0.14331007	-0.28068495	-0.03722906	0.03722906	-2.2863536	-0.06816912	2.0200753	-0.24741983
A_32_P188888	-0.6795645	-1.1399283	0.5463371	0.12673855	-0.24827671	0.9355259	-0.002562523	0.002562046	-1.2346992	-0.24468422	0.09872341	0.7053938	1.8817191	1.4401507	-0.7261777	-0.18795395
A_23_P135381	0.38024426	0.19155598	0.11772728	-0.97908497	-9.495357	-0.747983	-0.20116615	-0.24477291	-0.11772728	1.2781782	-0.6645489	1.6394386	-7.9165998	0.37797928	0.6326914	0.61458874
A_23_P151294	-0.0019578934	-0.19385147	0.24857235	0.0019569397	-0.25848198	0.06364727	-0.04592991	-0.2922125	0.37129354	-0.040035248	-0.64466953	-0.03798294	1.2865	1.2363405	0.54525137	0.19321346
A_32_P149011	0.87095594	-0.7179227	-0.053449154	1.2303815	-2.7595878	0.9357171	0.72950983	0.4462781	0.053449154	-0.19651842	0.89798117	-0.9384656	-0.40282822	-0.16007519	-1.3173566	0.45817804
A_32_P156549	0.17306805	0.40516567	0.482399	-0.0042505264	-0.65700054	0.0042505264	-0.2874279	-0.37625027	0.15248775	-0.3502636	-0.16988754	-0.4790249	-0.58747196	0.19497204	0.3583107	0.102861404
A_23_P215419	0.049395084	0.5324855	0.21100187	-0.058853626	-5.1831145	-0.107163906	0.10481882	-0.10539293	0.01414156	-0.01414156	0.08009195	0.2000022	-4.9427643	-0.22889853	0.3673854	-0.17022276
A_23_P145874	0.27740288	-0.28428078	0.13746166	-0.13746262	9.126885	-0.16644955	-0.24618149	-0.2804823	-0.90640545	0.50182486	-0.71072674	-0.20117092	9.872381	0.73985386	0.67104435	0.31210995
AT_ssH_TR_5	-0.498641	0.76981974	-0.013074398	-0.3048663	0.7719703	0.39479685	0.5815892	-0.5001974	0.51547956	-0.101308346	-0.5225496	-0.73929596	0.46027994	-0.7689948	0.25803804	0.013074398
A_23_P127662	0.5631304	0.6157026	0.19216585	1.4048233	-0.3306098	-0.19216585	-1.3704195	-0.5580287	-0.7781739	-2.2649007	-2.6928334	-2.1776175	1.6406512	1.6536312	1.6039748	1.4871936
A_23_P253029	0.81258106	-0.14660263	0.2155037	0.8580923	0.73237324	-0.6495228	-0.39465427	-0.12847614	-0.54721546	-0.25772667	0.17748642	-0.42165852	0.67246914	0.33739758	-0.14660072	0.12847614
A_32_P125233	8.8357925E-4	0.50448847	1.4073887	1.019577	-8.8357925E-4	1.0125132	-0.2404809	-0.89937353	-0.081532955	-0.04921961	-0.9693074	-0.7897372	1.7099705	0.13721609	0.30089474	-0.2969799
A_24_P298846	0.025307178	0.7279353	0.15180731	0.09221697	0.3232417	-0.2796588	-0.08090258	-0.4924636	0.1831975	-0.38754225	-0.025307178	-0.3820815	0.4700532	-0.2062459	-0.07599592	0.3517089
A_23_P141315	0.28957272	-0.027990341	0.19105244	0.5533657	-2.281001	-0.82319546	-0.7459812	-0.7243862	-0.6668968	-0.10713196	0.027990341	0.12014675	-1.5158434	0.41173458	0.050849915	0.18975353
A_23_P87351	-0.141006	-0.21566153	0.39120913	-0.014364719	-2.6818738	0.16346407	-0.25585508	-0.2949729	0.014364719	0.5671811	-0.40510988	0.5134225	-1.0949531	0.59902334	0.13846922	0.4372468
AT_ssH_PC_3	0.24206352	0.05125141	0.06593704	0.047222137	-1.0682917	-0.30335522	-0.43301105	-0.1624775	0.3089075	-0.04642582	-0.053747177	-0.053908348	-0.34006023	0.20265102	0.1283226	0.04642582
A_23_P155677	0.32436943	0.098023415	-0.37594032	0.11601734	-0.9710064	0.16989708	0.04082775	-0.32526112	-0.06744671	-0.12542343	-0.04082775	0.2837019	-0.97643375	0.08325577	0.53349304	-0.06609154
A_24_P938342	1.1673222	-0.13745499	0.262743	0.04013729	-0.57752323	-0.040136337	-0.18135929	-0.2148571	-0.76735115	-0.13348961	2.9047818	-0.053408623	1.0362387	0.842741	0.7633009	0.399827
A_24_P131173	0.12913227	-0.6582823	-0.3867464	0.14501381	0.81225395	0.5827446	0.39619446	0.07679844	0.35553932	-0.07679844	-0.66468334	-1.1510353	0.73126554	-0.73190784	-0.09449053	-0.46856308
A_32_P76091	0.57676935	0.047627926	0.82793	0.42940092	-3.02391	-0.028764248	0.21727037	-0.37960577	0.028764248	-0.047806263	-0.037580967	-0.16135263	-2.4897733	-0.24459124	0.56530714	0.3140149
A_24_P50489	-0.032866478	0.23195171	-0.27884388	-0.16074467	-0.32077217	0.13095951	0.16266918	0.16697407	0.1822977	-0.11999798	-0.35987186	-0.03430271	-0.044670105	0.14709568	0.4581709	0.032866478
A_24_P276932	-1.6016064	-1.5745935	0.5847268	-0.15218306	-0.78723955	1.315414	0.15218258	-0.4610319	-1.0540118	0.3056283	-0.4289794	0.43613482	2.4907193	0.7038865	0.3407278	-0.17152452
A_24_P838448	0.14812899	-0.35081816	0.6153827	-0.16866827	-3.4590282	-0.072453976	-0.21491766	0.8309579	0.19303179	0.48403025	0.06774378	0.1586852	-3.2778	-0.03500223	0.03500223	-0.30179358
A_23_P337746	0.1513815	-0.2899561	0.43881655	-0.06736994	-0.9807553	-0.4580655	-0.092209816	0.12608147	-0.35076237	0.49013805	0.7599735	0.40743637	-0.21814871	0.29870415	-0.47261477	0.06736994
A_23_P216689	0.9693589	-0.45220613	-0.43580294	0.71291494	-0.1205678	-0.4547391	0.013226032	0.43763685	-0.13093424	-0.052597523	0.9103389	0.6743455	-1.460238	-0.013226032	0.40745115	0.031672955
A_24_P208897	1.2352042	0.5628333	-0.044610977	0.28283024	1.6606894	-0.28944588	-0.14162922	0.044611454	-0.39844418	-1.1471605	-0.19060707	-2.152895	0.79953957	0.35763645	0.51930666	-0.101836205
A_24_P42557	0.123402596	-0.19990444	0.19429588	0.34828758	-0.69871426	-0.1481247	-0.3187027	-0.3622322	2.2686272	-0.206254	-0.6638117	-0.12340164	0.9159193	0.7144079	0.6268282	0.26016808
(+)E1A_r60_3	-0.21670341	0.2504449	0.22439432	0.17770386	-0.51609993	0.010180473	-0.5845537	-0.43449497	0.59747696	-0.08530712	-0.19245148	-0.15531635	0.7063198	0.79159164	0.28927183	-0.01017952
A_23_P93295	1.5233555	1.3058896	0.04438114	1.5822406	-0.38697624	-0.04438114	-0.4851675	-0.50841427	-0.98066807	-0.3602457	-0.8161783	-0.27596188	1.7219877	2.758654	1.2529707	0.53955555
A_24_P926770	-0.17682266	0.4274907	0.17682266	1.0664701	1.7841096	-0.37042713	-0.6860709	-0.64345837	-1.169384	-1.5739694	-1.0380979	-1.3134227	2.118466	1.1801014	0.61054707	0.32421398
A_23_P67355	0.060276985	0.03586912	0.2576599	0.07534313	-2.2276802	-0.72113705	-0.37816668	-0.14458418	-0.0358696	-0.68938446	0.116517544	-0.45872402	-1.3514361	0.5756755	0.32364273	0.30612946
A_23_P48487	-0.008073807	0.79120207	0.28840542	0.008073807	-0.014208317	-0.5818939	-1.3970909	-1.1876836	0.2638631	-1.063611	-1.8456035	-3.2528567	2.3138337	1.189107	1.2158952	0.3638792
A_23_P204947	0.029390812	0.42961454	0.4757886	0.74164724	-1.6065488	-0.09781027	-0.2017684	-1.1186967	-0.8931966	-0.94069433	0.23083258	-0.925755	-0.029390812	0.2761364	0.39500856	0.5597944
A_24_P50738	0.2720518	-0.032624245	0.35862732	8.003167	-0.5903101	-0.028229713	-0.21407032	-0.2610054	-0.6657057	-0.059929848	-0.5087671	0.028229713	1.0211382	0.818604	0.7263098	0.35589504
A_24_P624263	-0.39969397	-0.3281603	0.055430412	3.1020737	3.475462	-0.5504637	-0.71528625	0.038105488	-0.22507906	-0.038105488	-0.87141705	0.3637166	3.257348	0.8335085	-0.14765406	0.3954606
A_23_P351328	-0.66407585	-0.9665346	-0.044917583	1.9379568	0.7293539	0.52240276	-0.13436317	0.04491806	0.07413769	-1.0014582	-1.3838816	-0.91179276	1.9106646	2.2961998	1.4054198	-0.59945583
A_23_P129829	0.37975502	0.12274647	0.12434006	0.3970909	-0.07483578	-0.45282173	-0.43787098	-0.27829838	-0.1060791	-0.36136627	0.07111454	-0.019532204	0.09205532	0.47407913	0.015826225	-0.015826225
A_23_P142688	0.7962651	-0.4684291	-0.7452445	0.55083513	1.5567393	0.10884237	0.24225569	0.06140852	-0.0907855	-0.09215975	0.062660694	-0.42380285	0.6870122	-0.06140852	-0.3005309	-0.3918004
A_32_P10665	0.31142282	-0.43316078	0.13882065	0.14940071	2.3414993	-0.5336652	-0.05564308	0.486578	-0.6662817	-0.45562363	0.3293023	-0.4208293	1.8597283	0.055642605	-0.68241644	-0.1408062
A_23_P53015	1.1846459	-0.3521583	0.22526622	1.5580342	-0.827029	-0.2741239	-0.0509336	0.0509336	-0.06891799	0.32144475	0.5417044	-0.25540376	-1.5113719	0.40925336	-0.3189485	0.16225171
A_23_P56855	0.06444931	-0.22283363	0.9808769	-0.06444836	-0.84764004	-0.27028084	-0.469697	0.20809555	-0.85888577	-0.27875328	0.22928524	-0.18579292	1.1070986	0.9510207	2.176097	0.09040642
A_32_P184330	0.06424713	-0.22078991	0.1671896	-0.064248085	5.3983817	-0.27541924	-0.47693062	5.1549673	-0.85717964	-0.28105164	-0.71196175	-0.18757248	4.0589204	0.55363226	3.574236	0.081843376
A_24_P212086	0.26831818	-0.014602661	0.37266588	0.1400795	-0.65924263	-0.07663727	-0.28010178	-0.3199768	-0.65145874	-0.07935524	-0.5077286	0.014602661	0.947484	0.7502556	0.65275097	0.27731705
A_24_P373475	0.26812935	-0.012550354	0.3742385	0.14030361	-0.6671257	-0.08185387	-0.28739166	-0.3256569	-0.64977264	-0.0818491	-0.50764847	0.0125494	0.9389906	0.7428584	0.64461184	0.26886368
A_23_P107597	-0.33863115	0.7786832	-0.8579035	-1.8105183	5.4579954	0.592165	0.4726286	-0.07609415	0.4248252	-2.0352745	0.07609415	-1.9405622	4.8932776	-1.2153606	-0.44054842	0.7219777
ETG02_36680	0.053174973	0.29328728	0.29650402	0.29909515	-0.64680195	-0.24323273	-0.23723221	-0.4471016	-0.05317402	-0.17662048	-0.60399914	-0.21438408	0.9502435	0.8533039	0.9581299	0.5018525
A_24_P394940	0.1944027	-0.08000755	0.30569935	0.067500114	3.0053163	-0.17041588	-0.13093662	-0.41478252	-0.71827507	-0.16271305	-0.5809946	-0.06749916	2.2191734	0.6479945	0.54799414	0.17094898
A_24_P912617	0.26851463	-0.0040483475	0.38118982	0.14166927	-0.6976814	-0.10137653	-0.31540775	-0.34591484	-0.64282703	-0.09128666	-0.50710297	0.0040483475	0.9062729	0.7150593	0.61445236	0.23676014
A_23_P152107	-0.019255161	0.24769258	-0.32206106	-0.083165646	-0.43812227	-0.12846994	0.019255161	0.035574436	-0.079199314	0.10175657	0.3294263	0.5249095	-0.2831769	0.53028345	0.57641554	-0.3320155
A_23_P97584	0.091546535	-0.006392002	-0.059672832	-0.08095217	-1.6946216	0.31091738	0.39188337	0.03802252	0.087359905	0.006392002	-0.011377811	0.15617323	-1.4474683	-0.19929266	0.15017176	-0.1550889
A_32_P146113	-0.05597353	-0.7159343	-0.2834053	-0.6946516	0.29815102	-0.37968826	0.07365751	0.96811104	0.14808083	0.53958845	0.3600979	0.482347	-0.050529003	-0.371418	0.05052948	-0.312047
(+)E1A_r60_a97	-0.17922878	-0.7254658	0.09423447	-0.09423447	0.5228033	-0.41345596	-0.19351387	0.20766926	0.7486086	1.1647053	1.7695513	1.9776363	0.34539795	-0.17524242	-0.71219444	-0.50721836
A_24_P305467	0.1074152	0.40849018	0.07482624	-0.03410244	-0.7137613	-0.02771759	0.0015592575	-0.39792442	0.5403452	-0.0015592575	-0.4729519	-0.041959763	-0.6112795	0.0094919205	0.033956528	0.111063
A_23_P426140	-0.26952028	0.009640217	0.15623713	0.13600874	0.6186223	0.02272749	-0.23579836	-0.69920206	0.10098314	-0.38139963	-0.8749442	-0.9531398	0.6520095	-0.44699192	0.9762502	-0.009640217
A_24_P356721	0.041071415	-0.1107707	-0.018036366	-0.31556273	-0.5935836	-0.43596792	-0.1478095	0.17342806	-0.15659666	0.28286982	0.22285414	0.6969342	0.018036366	0.6425147	-0.35248804	0.38074827
A_23_P356755	-0.014863014	0.12497139	-0.05993557	0.06698799	-0.7692957	-0.72307014	-0.20015335	0.27508068	-0.45166206	0.05038643	0.42885494	0.44674492	-0.18346119	0.12884712	-0.18418694	0.014863014
A_23_P379550	1.1142068	0.23205519	-0.3555684	1.156033	-0.40066195	0.20798731	0.46545744	0.07865858	-0.07865858	0.091076374	-0.08267641	-0.70033026	-0.6403394	-0.20753908	0.22472048	-0.5162873
A_23_P345710	1.0983934	0.18267727	0.015283585	1.0166817	0.036836624	-0.16852951	-0.21791744	-0.26492023	-0.19892406	0.050251007	-0.068338394	-0.42805767	0.0018186569	0.43036652	-0.120409966	-0.0018186569
A_24_P719096	1.2728548	1.6522026	0.9148073	-0.060358047	-0.6468134	-0.3499813	-0.43397045	0.36899662	-0.82975197	-0.31989384	-0.16127777	0.041582108	1.2711754	1.5375977	0.3369279	-0.041582108
A_24_P343233	-0.1644721	0.1872611	-0.0062146187	0.32860804	0.11700487	-0.4116149	-0.7890372	-0.45384645	-0.16698027	-0.14229345	-0.46325922	0.0062146187	1.2842011	0.5293555	0.22139311	0.20256281
A_23_P408787	0.27957916	0.019392014	0.4100275	0.15415287	-0.77150154	-0.14122486	-0.3863001	-0.38872337	-0.6120205	-0.10848808	-0.5036726	-0.019392014	0.82037354	0.6543474	0.54052067	0.16297722
A_23_P344655	0.84485817	-0.40012407	-0.18170977	-0.4390931	-0.1491847	0.08094072	0.7185745	1.0873022	2.6462703	-0.70288515	0.7225461	-0.6148524	0.22136927	0.05774069	-0.05774069	-0.43453646
A_23_P350678	0.19347477	-0.0677824	0.32674026	0.067783356	-0.61831	-0.23213387	-0.48203564	-0.4820528	0.762763	-0.196949	-0.5921421	-0.11012173	0.9085164	0.56154156	0.44445372	0.06840134
A_23_P397933	0.09838581	0.26098347	0.2331481	-0.027572632	2.3566694	-0.32928467	-0.4155302	0.027571678	-0.7884178	-0.2929201	-0.6886101	-0.20736504	2.356584	0.4637041	0.34466553	-0.030278206
A_23_P145024	-0.4266975	-0.5802438	0.6577318	-0.24138045	0.18848586	-0.17153859	-0.34819245	-0.49237847	-0.41642404	0.53774714	0.319165	0.6591041	1.1941836	0.5972197	0.023791552	-0.023791552
A_24_P104115	0.1789813	0.13988686	-0.048226357	0.14883327	-0.8160763	0.16170073	0.10750437	0.06630278	0.048226357	-0.7621236	-0.32532072	-0.71212006	-0.06794691	0.41476917	-0.25009108	-0.30439138
A_23_P433829	0.28139257	1.1741171	-0.21557999	-0.05875826	1.8461895	0.15156126	0.05875826	-0.50214815	0.620059	-0.8330445	-0.49817514	-1.366682	1.6889033	-0.78621006	-0.10038519	0.52102137
A_23_P110846	-0.38952923	0.1292162	0.033186913	-0.3605318	-0.5051832	0.19325447	0.2518072	0.017971039	0.084469795	0.091153145	-0.2718811	0.0043973923	-0.28394032	-0.08293724	-0.0043973923	-0.04656887
A_24_P910381	2.6136727	0.19542837	2.228015	3.3909268	-0.63109636	-2.0865579	-2.2216282	-1.3896894	-0.8096194	-2.7104945	2.0262027	-2.3420644	0.7089033	0.6695924	-0.19542837	2.0040178
A_23_P110699	0.016656876	1.5647459	-0.016656876	-1.5078592	-0.31012726	0.7230625	1.4414606	-0.34837914	1.1661015	-0.22995758	0.13933563	-0.8128171	-1.1358409	-0.2208705	0.58202076	0.016866684
A_23_P60811	0.045915127	0.5545225	0.006090164	0.7333598	-0.6625676	-0.20703506	-0.32148743	-0.39477062	-0.33640385	0.10658646	-0.12687302	-0.006090164	-0.34720802	0.101662636	0.42016935	0.3908887
A_23_P112327	1.1515875	-0.10037708	0.32022476	2.7107882	-0.4937992	0.01755333	-0.060559273	-0.09415817	-0.7231579	-0.10957718	-0.52635384	-0.017552376	1.0989885	0.9239564	1.5696058	0.49586153
A_24_P344890	0.2552805	0.96368647	0.6829257	-0.49489307	1.4380541	1.0654516	-0.7015991	-0.3388071	0.9199524	-1.5917768	-0.25528002	-2.6186428	0.98680973	-1.4375944	0.38824034	-0.5315871
A_23_P111381	0.09751177	-0.35227346	0.39929152	-0.29918242	-1.5871692	0.015992641	0.006102085	-0.044947147	-0.26122046	0.037902355	0.03376913	-0.006102085	-0.44217825	-0.068145275	0.2736373	0.06925917
A_23_P48414	-0.60252047	0.039438725	-0.06804991	-0.819365	-3.0326948	0.21993732	1.4019198	-0.19195795	0.29373837	-0.0394392	0.780951	-0.21152401	-1.6713433	2.4058547	0.36657763	0.2653389
A_32_P3518	0.22947025	0.32088375	5.1507864	0.02421856	-0.5486393	-0.02421856	-0.13250542	-0.16179562	-0.76671124	-0.13991356	-0.5754919	-0.05559349	1.0557895	2.2087612	0.8216047	0.4381714
A_32_P430743	0.010011673	0.72421694	0.6830406	0.07534933	0.67301893	-0.4980626	-0.10561466	1.2872324	0.12883568	-0.86007357	-0.6543875	-0.60894823	-0.9941778	-2.232822	-0.01001215	0.189569
A_24_P405552	-0.24478865	0.15904093	0.024837017	-0.472795	0.6197152	-0.28374243	0.18224478	-0.26059675	-0.30248404	-0.024837017	0.2913375	0.17748404	0.25040483	-0.36207533	-0.1367116	0.0941844
A_23_P85015	-0.13288069	-0.13461065	-0.35405874	-0.22544384	-1.5871634	0.8238368	1.2636075	0.7378211	0.9041724	0.22898912	-0.06622982	0.034755707	-1.5390735	-0.013931274	0.013931274	0.1586895
A_23_P215604	-0.12466407	0.6278355	0.3308184	0.022632837	-1.2531703	0.17414403	0.0048258305	-0.24849582	0.01871705	-0.11219096	-0.73052573	-0.42300963	-1.2475069	-0.0048258305	0.8660271	0.77615285
A_23_P369815	0.2797966	-0.07497692	0.56010914	0.24830341	-0.71885395	-0.008187294	-0.3070383	0.008187294	-0.2935915	-0.097929	-0.4549389	-0.04177189	1.1570692	0.9349737	0.6915283	0.34540367
A_32_P174908	-0.04914522	-0.8900418	-0.35874033	-0.03573847	-1.7349524	0.4532752	0.5604768	0.47713518	-0.0073132515	0.4087243	0.0073132515	0.5178876	-1.2935538	0.1433549	0.809731	-0.28926802
A_23_P47155	0.39450932	0.1797533	-0.029061317	0.041287422	-0.022304535	-0.44200516	0.09230232	0.028716087	-0.50327396	-0.23766994	0.32387066	0.022304535	0.33260727	-0.1442709	-0.34087753	-0.0712738
A_23_P66211	0.39960146	-0.032013416	-0.4388566	0.7578397	-2.3377757	-0.10876846	-0.00554657	0.00554657	0.120969296	-0.43175507	-0.42751265	-1.2659769	0.21225691	0.99057055	0.17590523	0.46558237
A_23_P14986	0.31523943	0.5789943	0.18297434	0.25027418	-8.496107	-0.44426203	-0.30433893	-0.22595549	0.0088477135	-0.001595974	-0.3994565	-0.16839743	-6.2573543	0.17186117	0.07187128	0.001595974
A_23_P146783	-0.007490635	0.17099762	0.9707551	1.4084373	-3.4222574	-0.547565	-0.7932577	0.56118536	-1.394381	-0.063042164	-1.1022081	0.2140894	0.0074911118	1.1884751	-0.19344997	0.94506025
A_24_P236008	0.06872463	-0.29177475	0.268651	-0.015072823	-1.0865574	0.6199293	0.264863	-0.15232182	0.36592865	0.015072823	-0.19769287	-0.1359806	-0.8041525	-0.28190613	0.57654476	0.13757038
A_24_P228611	0.25535297	-0.076236725	0.31708717	1.4825678	-0.5507393	-0.004506111	-0.16712093	-0.20566368	-0.70843124	-0.07547474	-0.53520584	0.004506111	1.3169699	1.4587369	0.77984	0.4143381
A_24_P11900	0.19788742	-0.13100338	0.2618084	0.05125332	-0.61242485	-0.06478214	-0.23016739	-0.27007866	-0.7633381	-0.13179874	2.5410814	-0.05125332	1.0028296	0.8026614	0.7165127	0.35058546
A_23_P419038	-0.46322083	0.544894	-0.23791432	-0.096621275	1.7798746	-0.016812086	-0.02870202	0.1152761	0.7678335	0.05325961	-0.5072019	-0.15103841	1.298826	-0.2532022	0.27903247	0.016812086
A_23_P335143	0.65587616	0.7388463	0.89379835	0.5280099	0.42444754	-0.76495934	-0.008620739	3.1193676	0.4220729	-1.3893142	0.008621216	-2.0264864	-2.5995646	-1.8567076	-0.48217773	-0.3884821
A_23_P165078	-0.36887407	0.37850523	0.085460186	0.8862653	1.1726098	-0.67370844	-0.5679164	-0.32275438	-0.085460186	-0.3440776	0.26043177	-0.22721243	0.8187127	0.46094275	-0.33526278	0.24648333
A_23_P104484	3.977169	1.3368263	0.15865898	1.675209	-0.74374485	-0.19023705	-0.3659811	-0.40953636	-0.8653612	-0.24153423	-0.69952106	-0.15865993	0.8703594	1.8892193	0.5787988	0.21147346
A_23_P252145	0.24791431	0.3316269	0.4437828	0.18850422	-1.1786346	-0.053816795	-0.1572094	-0.33384228	0.14398956	-0.44782352	0.053816795	-0.19664001	-0.83130074	-0.2746067	0.5632191	0.20306683
A_24_P363134	-0.003950119	0.85159874	0.12091446	0.2897601	-6.4414196	-0.16867495	0.4515047	0.012081146	0.003950119	0.044041634	-0.11921692	-0.10301876	-4.828067	-0.4160781	-0.5651822	0.13418579
A_23_P315364	0.60155344	1.393116	1.1810064	-0.38280535	0.337265	-0.68066263	0.66824055	1.3240347	-1.4197197	-0.40014648	-0.18803453	-0.91418266	1.5919633	-1.186254	0.18803453	-1.5389519
A_24_P766854	0.18767834	-0.11982727	0.26969624	0.05484104	-0.66474724	-0.104712486	-0.28905296	-0.33489895	2.3709812	-0.14079571	-0.09642601	-0.05484104	0.9473982	0.7446661	0.6527996	0.28325558
A_23_P200425	-0.46555758	-0.31734037	0.17003965	-0.5388446	-1.3940473	0.03467989	-0.15029573	0.119336605	0.20506048	0.16696787	-0.03467989	0.22806025	-0.38994455	0.21895647	-0.109255314	0.3665614
A_32_P93996	0.3245976	0.93338704	-0.30050397	0.81593347	-0.3681667	-0.07702613	-0.25952888	-0.14771724	0.5375464	-0.012159109	0.16513705	0.012159109	-1.1287539	0.38984323	-0.30748916	0.1759603
A_23_P10561	0.27073097	-0.026700974	0.3613248	0.35698414	-0.60830116	-0.040423393	-0.23246002	-0.278018	-0.6617689	-0.062224388	-0.5078516	0.026700974	1.6922121	2.8095798	1.9252663	1.1821032
A_23_P384825	-0.25732183	-0.24737453	0.030125618	-0.47952843	-1.7244167	0.70668125	1.2129788	0.5882497	0.35564137	0.052587032	0.07325649	-0.7795358	-1.3205757	-0.9368963	0.65253973	-0.030126095
A_32_P136427	-0.069523335	0.20233011	0.2809062	-0.015685558	-0.88789415	0.9591737	0.06496763	-1.0292678	0.22570658	0.25572252	-2.0624971	-1.8301578	-0.23767805	0.015685558	0.2785802	-0.2079773
A_23_P155830	0.15588379	0.023529053	0.31240273	0.36619282	-1.0062418	-0.13341618	-0.21209717	-0.37374115	-0.049739838	-0.008138657	0.010320663	0.073070526	-0.61969566	0.16224384	0.008138657	-0.018342972
RC5	0.264431	-0.033201218	0.3162613	0.1926012	-0.59331226	-0.017457008	-0.20048046	-0.15871906	-0.6590452	-0.026812553	-0.4978733	0.017456055	1.0453682	0.8548012	0.6787987	0.48058224
A_32_P230059	2.1273193	0.8411455	0.7620268	1.6547642	-0.2232523	-1.167593	-1.4227562	-5.510738	-1.0302744	-0.7068243	1.4324942	-0.5311737	0.2232523	1.9329872	-0.56508255	1.1489334
A_23_P63167	0.3408084	-0.088778496	1.6176729	0.39306545	0.043727875	-0.14686489	-0.350502	-0.043727875	-0.7265072	-0.1497736	-0.35734558	-0.057275772	3.4886384	2.936339	0.5826473	0.20785332
A_23_P158461	0.13276577	-0.1560216	6.1100917	-0.088888645	-0.009642124	-0.4437375	-0.033440113	-0.68776464	1.0607753	0.009642124	-0.8728843	-0.35093355	1.6715541	2.6344547	1.2189889	1.0124402
A_23_P75973	0.6417451	0.26107073	0.28256655	0.66745996	0.10302019	-0.013886929	-0.05302	-0.036562443	-0.37382936	-0.23512793	-0.2548051	0.013886929	0.22348976	0.28900576	-0.3264308	-0.1409812
A_24_P209204	0.022437572	-0.55229425	0.71427965	-0.12714052	-0.7852721	0.32018042	-0.24257421	-0.22854662	-0.13874292	0.3341527	-0.022437572	-0.08802366	0.31260347	0.14572763	0.68573904	0.09166002
A_32_P213091	0.30678368	1.3578014	0.22407246	0.7728014	-8.475981	-0.18281937	-0.35403633	-0.39308643	-0.10932636	0.14758968	-0.08535671	0.68172073	-6.8707266	0.70029926	0.08535671	-0.23084068
A_24_P119002	1.1294241	-0.1491108	0.65134525	1.035182	-0.062568665	-1.0087652	-0.3643217	-0.30236197	-0.38947964	-0.6025109	1.4601727	0.80813885	-0.4248743	0.21719027	0.4141035	0.062568665
A_24_P161086	1.3544149	0.9390621	0.5986624	1.465703	-0.6337719	-0.9394455	-0.6126194	-0.8344593	-0.64016056	-0.14447784	0.2576952	0.04395199	-1.0735254	0.31548023	0.9740124	-0.04395199
A_32_P205913	-0.20218134	-0.8976402	1.0204787	0.1422739	-0.58282185	-2.2172928E-4	-0.64723253	-0.2851472	-0.1692481	0.82750654	2.2172928E-4	0.8612313	0.29877853	0.6515255	0.14389944	-0.075553894
A_23_P337767	0.8896582	-0.042721033	0.4230411	1.2532876	-0.692085	-1.2458637	-0.5604489	0.10796952	-0.71365	-0.3832376	1.0573628	0.8452656	-0.96636176	0.57244086	-0.6678779	0.042721033
ETG10_13482	0.13430691	-0.18751717	0.02188778	-0.010719299	-0.1860323	0.027005196	-0.2806301	-0.34010506	0.010719299	-0.16701412	-0.5498991	-0.2549305	1.1816578	1.0415573	0.83799076	0.61889267
A_32_P59010	0.032710075	-0.23214626	0.1503272	-0.09143448	1.6158471	-0.35661316	1.2041769	-0.22431374	-0.6344023	-0.33576298	0.7391596	-0.24222279	1.6957235	0.45048285	0.3463354	-0.03271103
A_23_P427299	-0.40280104	0.07930803	0.6113858	0.82748175	-0.75565577	-0.07930803	-0.6111989	0.18555164	-1.2591519	-0.54812336	-0.33996677	-1.2384696	0.26958847	0.66534185	0.46631908	0.24776268
A_23_P17655	-0.4077859	-0.69028807	-0.30762625	6.182569	-1.441607	-0.01559782	0.4438119	1.0091987	0.41947412	0.01559782	0.30190134	-0.70829725	0.15881062	-0.021895409	0.16687918	-0.50715303
A_23_P164100	7.2208366	-0.74880314	0.033979893	2.6131525	0.38512516	-0.8888731	-0.2246666	0.4951067	0.4243827	-0.033979416	-0.1552763	-0.77046394	0.09194851	1.0308876	-0.19378424	-0.5729933
A_23_P31725	6.963105	-0.084344864	0.2992983	0.5316372	-0.8503399	-0.22893524	-0.4640026	-0.47439194	0.6053643	-0.20121193	-0.6023207	-0.109544754	0.74833584	1.1354609	0.46355057	0.08434391
A_32_P66072	-0.8074956	-1.1722007	-0.74422646	-0.115475655	0.02425623	-0.08473635	-0.319983	0.20487499	-1.9086275	0.6356034	0.530447	1.4715443	1.0829358	1.1997428	0.60353947	-0.02425623
A_23_P39454	0.26161957	0.0018043518	0.38711166	0.13780403	-0.71181107	-0.1505413	-0.390584	-0.0018033981	-0.6341753	-0.11987686	-0.5186577	-0.02964878	0.8195524	0.6469507	0.53660727	0.15792179
A_23_P67332	0.35777903	0.2823186	-0.008732319	0.7252717	1.4659019	-0.69998884	-1.2210908	-0.64428186	-0.27252626	-0.8284993	0.008732319	-0.70734453	1.3733411	0.9106488	-0.56433916	0.024545193
ETG04_27747	0.030007362	-2.0885468E-4	0.14444065	2.0980835E-4	-0.72372913	0.007997513	-0.22231293	-0.3960743	-0.042446136	-0.1506195	-0.6816845	-0.15962029	0.91308784	0.739418	0.5534229	0.45143414
A_23_P205646	-0.045407772	0.10073328	0.045407772	-0.26670122	1.166038	0.29942465	0.34302282	-0.23413038	0.27577066	-0.20480108	-0.4743533	-0.5613446	0.555552	-0.73709154	0.73855543	-0.2240529
A_24_P157415	-0.73181605	-0.09948516	-0.42516065	-0.71388793	1.3405955	0.28937554	0.79217744	0.28255296	0.0054552555	0.08178067	-0.0643518	0.2810185	0.8245146	-0.4649217	-0.0054552555	-0.093118906
A_23_P418493	0.33980322	0.4802642	-0.09141779	0.45904493	0.012772083	-0.27204657	-0.35016394	-0.14681578	-0.012772083	-0.01479578	0.3838992	-0.08676863	0.20627451	0.38702345	-0.40817118	0.1340127
A_24_P3415	-0.41342187	0.05321479	0.3768952	-0.05321479	-5.4433537	1.1279423	1.5440094	0.29518867	0.3302567	-0.696645	0.32751727	-0.10815835	-4.0315924	-1.6489732	1.8182251	-0.63394475
A_32_P136269	-0.7554617	0.37912846	0.15200615	-0.5067673	-5.7864046	0.2353611	0.3932953	0.25095463	0.18327332	-0.38719845	-0.019241333	-0.061897278	-6.1061764	-0.36487484	0.019241333	0.30849934
A_23_P39040	0.4913206	-0.42582798	-0.6568651	0.5302868	-1.9554586	0.22944832	0.113658905	0.1331091	0.24407578	0.09112358	0.10211182	-0.33045673	-2.4294329	-0.09112358	-0.29741383	-0.35261536
A_24_P295620	-0.11169243	-0.77177334	0.11169243	-0.30584717	-0.5592756	0.44761372	0.26038933	0.17110062	0.19235802	0.29685593	0.49140358	0.58306026	-0.5397482	-0.2636757	-0.19711494	-0.14712429
A_32_P146777	-0.031413794	0.64128804	0.102960825	-0.08238721	0.5911248	0.031413794	-0.24291778	0.19825006	0.39800763	-0.24511743	0.830642	-0.71158195	0.056524992	-0.29622626	-0.14176679	-0.38141704
A_24_P410639	-0.28478813	-0.71806717	0.70926285	0.10264683	-1.7343025	0.27744198	0.12437439	0.16959381	0.1802206	0.49060154	-0.22065544	-0.1385889	-1.1462727	-0.14330196	0.048656464	-0.048656464
A_23_P124384	-0.5549331	-0.08369064	0.08369112	0.36651278	6.0790644	2.1633315	-0.61341953	-0.9365444	-0.9335675	-2.6487885	-0.8850174	-0.82103395	5.6535425	2.6200204	0.9343214	0.3141656
A_23_P125771	0.6695862	0.08805752	-1.0050182	0.97885513	-0.08805752	1.2376776	1.3537226	0.4797573	0.71463394	-0.16241169	-0.41044903	-0.99067354	-1.3485994	-0.5123315	0.42160034	-0.9272332
A_23_P93722	0.08026123	0.63565636	0.36101818	0.48501396	-3.8950992	-0.75382614	-0.29997158	-0.39628124	0.616292	0.047332764	-1.0749006	0.23253822	-3.785923	-0.047332764	0.3488655	-0.71533394
A_23_P127288	0.46425056	-0.10016441	0.31960964	2.141337	-0.49235535	0.017510414	-0.058444023	-0.091404915	-0.7235222	-0.11019993	-0.52560425	-0.017510414	1.0983315	0.9244232	0.85436153	0.496006
A_23_P132294	-0.109941006	-0.025157452	0.6784854	-0.08233309	-1.5730357	0.21829271	0.025157452	0.10801363	0.32647657	0.1834836	-0.30899286	-0.21200705	-0.3971429	-0.12656832	0.13993979	0.12754679
A_24_P830006	-0.39285088	0.118777275	0.09210873	0.6712394	-0.12264824	0.32508564	-0.4116106	-0.22922707	-1.005074	0.23023939	-0.7912946	-1.7030106	1.0066147	1.5034409	0.85454464	-0.09210873
A_24_P710866	0.03953457	0.57213926	0.31146002	0.6769171	-0.5831518	-0.039534092	-0.48490334	-0.54955053	-1.2481618	-1.021131	-1.0332861	-0.30910635	1.7112627	1.7422185	1.4332323	1.1442089
A_23_P313640	-0.23284769	0.12139654	0.3472638	0.103262424	1.8190885	-0.0043902397	-0.01943636	0.065562725	0.18559504	-0.30735254	-0.5932183	-0.086666584	1.3734908	-0.44755173	0.0043902397	-0.14354992
A_24_P100368	-0.14294958	0.13827085	0.28502083	-0.6473794	1.7081294	-0.3653388	-0.059937	-0.48241663	-0.89682007	0.059937	0.4776454	0.07640791	1.9344916	-0.4546833	-0.08260679	0.31743097
A_32_P105397	-0.56045103	1.3141336	-0.7760353	-0.4759655	4.3141403	0.15047455	0.73249817	-0.34539127	-0.15047503	-0.43306494	0.39549065	-0.724072	3.9622393	-2.0577993	0.82889414	0.28819084
A_24_P121271	0.07711458	0.37332964	-0.6841779	-0.38615084	-1.2459579	-0.05224657	0.18206358	0.15318727	0.30274916	-0.060543537	0.0030961037	0.3522029	-1.3140111	-0.0030961037	-0.5849643	0.03204012
A_32_P18838	-0.7426629	-1.0860686	0.2312932	-1.1493926	-0.026128769	0.5418267	0.5698199	0.93067646	0.57041216	0.016581059	0.12693453	-0.31675005	-0.016581059	-1.1546931	-0.68134975	0.9637284
A_23_P163099	0.48036575	0.17114067	0.56371784	0.5416498	-5.1009984	0.054828644	0.1269207	-0.076880455	-0.05404854	0.010016441	-0.11063862	-0.028902054	-4.5011992	-0.010016441	-0.14328003	0.8911457
A_24_P324783	0.6586356	-0.2175684	4.6509624	0.5513997	4.796175	-0.7418418	-0.27128124	-0.061386585	0.12087822	-0.8375335	-1.0016351	-0.7586055	4.3770967	0.3747759	0.061386585	-0.30174398
A_24_P144183	0.20349264	-0.21170855	0.3858714	0.22322702	-0.4903016	0.31920862	-0.10698938	-0.2076745	-0.15949488	0.00482893	-2.425116	0.6509414	-0.00482893	0.05356741	0.32347918	-0.007065296
A_23_P8625	2.2304554	-0.014351368	1.6141038	2.409503	-5.3096666	-0.30215597	-0.47830772	-0.53654146	0.09346628	-0.15479755	0.014351368	0.55142546	-3.672556	0.39408016	1.3221173	-0.06485367
A_24_P124550	-0.82376194	-0.7947035	-0.8459635	-0.47129726	1.8023157	0.69798374	1.3549814	0.25564766	0.38798332	-0.27764416	0.14315128	-0.14369678	0.56509686	-1.2813864	0.21613026	-0.14315128
A_23_P92842	-0.090875626	-0.3479557	-0.26230335	-0.15965462	1.0515661	0.090875626	0.15157509	-0.12403011	-0.42264557	0.14481926	0.5137949	0.45890522	1.4061384	0.10234547	-0.13011551	-0.36008263
A_23_P7033	-0.09993982	0.21084642	-0.11411333	-0.33657122	-1.04001	-0.030516148	-0.08539438	0.030516148	0.5200124	0.3025899	-0.598454	0.06418562	-0.3163762	0.12960863	0.062551975	0.36776018
A_23_P130865	0.5345659	0.36777878	-0.48489952	0.72793007	-0.5947838	-0.32844448	-0.026023865	-0.123986244	-0.5156574	-0.0731163	0.23428154	0.026023865	-0.33417702	0.6218319	0.3519354	0.027392387
A_23_P33809	0.26171684	-0.20001125	-0.25008678	0.03985977	-0.8250494	-0.05699253	0.24479294	0.5362539	-0.48919868	0.30322266	0.8751669	0.60111046	-0.72051907	0.26287365	-0.03985977	-0.09439945
A_23_P367071	0.08126402	0.9413729	0.25341988	0.8601785	-1.0240002	-0.081264496	-0.75174093	-0.37808514	-1.5545864	-1.0982599	-0.2938943	-1.7426729	1.2320461	1.9950452	1.3198795	1.0886545
A_24_P50437	-0.03778267	0.6722231	-0.9117327	-0.2609768	0.8061943	-0.11878681	-0.21450424	0.02325821	0.12607288	-0.53806305	-0.37372684	0.6498575	0.1246109	0.20481014	-0.02325821	0.4881258
A_32_P66674	-0.30140257	0.93579006	-0.55278254	0.47314358	0.54867506	-0.29270792	0.03678751	-1.2170272	1.5268168	-0.82747793	-1.9285216	-1.386951	1.2261953	0.9832573	0.34221792	-0.03678751
A_24_P214552	3.604895	1.1372285	-0.13423681	1.3231144	-0.8545637	-0.8466997	-1.0226107	0.13423729	-1.5260305	-0.8990097	-1.358861	-0.81733036	1.6977229	2.1949825	1.5516925	1.0282488
A_23_P95050	0.09569025	0.24219942	0.25357103	-0.027869701	-0.005858898	-0.29758787	0.005858898	-0.2513671	-0.46620798	-0.29322672	-0.2612071	-0.024260998	0.22810411	0.093111515	0.4522071	0.46145105
A_23_P99452	0.1285677	0.36701345	-1.1456528	0.75772905	-2.6468472	-0.0759902	0.0759902	0.3844967	0.4411645	-0.37445545	-0.39463997	-0.24603939	-3.0465117	-0.18947029	0.9670639	0.21039009
A_23_P98900	-0.41030335	0.44895053	-0.8656633	0.13271832	5.9050026	-0.033858538	-0.22709966	-0.7236974	-1.2336118	0.14508176	-2.5655854	-0.058013678	5.2319765	0.8534372	0.21504188	0.033858538
A_32_P19917	-0.12111735	1.9011471	-0.122667074	-0.07813668	-0.78171945	0.07188773	0.15529847	-0.0110394955	-1.3305914	-0.4450724	0.117645025	0.46612668	-1.0625966	0.2655022	1.6386364	0.0110394955
A_24_P897997	0.449965	1.9520106	0.96816874	1.2627125	-0.9653702	0.018724918	-0.44882965	-0.6354675	-1.0505133	-0.43689442	-0.8905668	-0.3516159	1.0214949	2.5123525	0.67780495	-0.018725395
A_23_P107211	-0.028738976	-0.501914	-1.0929618	-0.02101326	1.7904682	0.02101326	0.44184113	0.13094902	-0.050019264	0.040112495	-0.38482285	-1.2958212	1.4949408	0.10260868	0.15590191	-0.10795021
A_32_P175715	-0.44004822	-0.28661108	-0.028008461	2.8050776	0.03204441	-0.34456968	-0.036156178	0.028008938	-0.10109043	0.58695316	-0.20220137	0.57139444	1.6843204	0.60288715	-0.14778996	0.23310232
A_23_P348138	0.2564292	-0.4167447	-0.5454097	-0.103283405	1.208138	0.2504449	0.6952882	0.53284216	0.16375303	0.011497974	0.008878231	-0.73480177	-0.008878231	-0.79418516	-0.90711355	-0.7566867
A_24_P489105	0.29840422	0.7267895	-0.11660528	0.92335224	0.11660576	-0.48301744	-0.5810771	-0.2382884	-2.8556166	-2.2554245	-1.8729095	-2.1672153	2.0522485	1.9576507	1.687398	1.0849528
A_32_P202587	-1.0031161	-0.22910643	-0.086482525	-0.12977791	0.2117877	0.5470023	-0.21082163	-0.8112173	-1.4093013	0.15141916	0.31880283	0.8311038	1.5394435	0.89076185	0.086482525	-0.27132893
A_23_P355075	0.5227127	0.12346268	0.2579975	0.5100355	-2.9113698	-0.26735592	-0.08005619	-0.1213665	-0.36934662	-0.08194065	-0.7515707	0.08005619	-1.6379781	0.47539425	0.113658905	0.43087673
A_32_P93584	0.3130679	1.9018192	-0.15609121	4.3611655	5.6503043	-0.5797858	-0.77977705	0.15609121	-1.1781182	-0.5891166	-1.0284352	-0.49904394	5.1418757	1.2886348	1.0415778	-0.17727613
A_32_P208200	-0.09941816	-1.0439439	-0.66020393	-0.88305235	3.453741	-1.0908189	-0.31913567	1.5150666	-0.7640376	0.09941816	-0.9477439	0.7694783	2.27562	0.29325104	0.40231514	0.31156015
A_32_P162416	-0.5587671	-0.11910224	0.31510186	-0.040176153	0.23829913	-0.47510314	-0.21425843	-0.108213186	-0.96848416	0.040176153	0.055363894	1.1422079	1.1367147	0.5109098	-0.26568246	0.04074979
A_32_P79103	-0.15195322	0.1519537	1.5687761	0.4153986	0.7891598	-1.3682137	-2.3180466	-0.81380796	-1.341569	-2.1538944	-1.2739382	-1.8373785	1.3216877	1.084166	0.44027996	0.4390974
A_24_P28657	-0.41630888	0.026815891	2.9420853E-4	-0.036015034	-0.8606992	0.13487291	0.052398205	-0.033108234	0.3025508	0.12245989	-2.9420853E-4	0.7406831	-1.3049235	-0.21345758	0.2301879	-0.29205275
A_23_P99044	-0.07346392	0.59584856	0.87001085	0.5855403	0.045575142	-0.20564413	-0.42650747	-0.045575142	-0.91221905	-1.4716234	-0.74412346	-2.0029278	1.4684057	1.9610653	1.5340462	1.1652718
A_24_P509948	0.27190685	-0.008323669	0.22784281	-0.32996702	-0.6222253	0.13851118	-0.015452385	-0.02935791	0.32920265	0.2512865	0.67452335	0.008323669	-0.43484592	-0.16468859	-0.037052155	0.40341663
A_24_P397204	0.7503891	1.2065296	1.328062	1.420968	-2.6539364	-0.55960274	-1.1359186	-0.16971111	0.16971111	-0.44370556	-0.5538502	-0.29193974	-0.38752317	1.8342962	1.6934576	0.9611225
A_23_P28834	-0.50001717	0.23670864	-0.82347393	0.87557936	-3.169424	1.8976703	1.8662772	-0.23670816	1.2014518	1.013474	-0.26683044	-0.3993082	-1.5644569	-0.3821993	1.103023	0.3465805
A_23_P251868	0.26725006	-0.0024166107	0.37830687	0.14411163	-0.70642185	-0.1052084	-0.32364082	-0.35077667	-0.64315414	-0.09038162	-0.5077591	0.0024166107	0.89816	0.70764685	0.6059146	3.7989454
A_23_P202156	0.6354494	0.17952824	-0.21689224	0.66841316	1.7424374	0.05013466	-0.10688162	-0.53553486	-0.1881094	-0.05013466	-0.55432177	-0.49227238	0.93906164	0.25542212	0.30715752	-0.6694579
RC1	0.2053566	-0.053120613	0.31044197	0.14957428	-0.62493515	-0.004371643	-0.22598171	-0.27413368	-0.66442394	-0.037366867	-0.51820755	0.004371643	0.97983456	0.8313942	0.6758857	0.32050705
A_24_P289954	0.63491726	0.6385207	-0.92229176	1.1057453	3.1184492	-0.36586428	-0.1324029	-0.69296503	-0.3132348	0.02196455	0.52096987	-2.1436749	2.730606	0.3581171	-0.16124582	-0.021964073
A_23_P33927	0.00916338	0.1599555	0.3285818	0.5886669	-0.058713913	-0.0091638565	-0.55333424	-0.3331585	-0.9378376	-1.6900063	-1.0683279	-1.62081	1.4233379	1.3656764	0.37617874	0.16437483
A_23_P56798	0.16807032	0.23810911	-0.005700588	0.07348585	-1.1438079	-0.38789034	-0.32331324	-0.09696436	-0.054897785	0.14360094	0.005700588	0.4492545	-1.0470662	0.3185277	-0.15596151	0.21625471
A_23_P327307	0.036762714	0.49662352	-0.23678303	0.60542727	0.6129737	0.14226294	0.2577548	-0.46194792	2.7418137E-4	-0.5880127	0.1807208	-0.0894146	-0.038968086	-0.6714587	-2.7418137E-4	-0.5393276
A_23_P170337	-0.1235528	0.22480631	0.05410242	0.27812624	-0.7578006	-0.04427576	-0.23672819	-0.21327734	0.20588827	0.04427576	0.15510225	-0.23181868	-0.28067923	0.2570567	-0.096529484	0.2751174
A_24_P182586	-0.1491642	0.4553566	0.056498528	-0.28466415	-0.066726685	-0.28551197	-0.098843575	-0.040751457	0.0616951	0.040751457	-0.4336605	0.40269756	0.06427479	0.11355591	0.5281124	-0.16846275
A_23_P416766	-0.18708754	0.42940092	-0.8744755	-0.92388725	-3.800026	-0.04201317	1.0232081	0.39448452	0.54327154	0.4868889	0.4740038	-0.10089731	-2.2020845	0.29286766	0.04201269	-0.3413291
A_23_P363831	-0.40932512	-0.36292696	0.0060448647	-0.53188944	-0.54578924	0.0468421	0.44786787	0.12020826	-0.019697666	-0.116193295	0.23391008	0.02102995	0.0066866875	-0.0060448647	-0.29845667	0.39646482
A_24_P144625	3.8437939	1.7039814	1.1713552	0.6884031	-3.2314568	-0.27064896	-0.98380375	-1.1600161	-1.1810093	-0.06637573	0.066375256	-2.194086	0.12063217	0.5064616	-0.2018528	0.45757866
A_24_P913828	-0.09337568	0.2694764	0.8728347	0.53045416	-0.5334439	0.3315587	-0.87144995	-0.4523878	-0.36416817	-0.22779322	-0.04784441	-0.7973728	0.68883324	0.53266525	0.244349	0.04784441
A_23_P329286	0.518168	0.43065977	-0.16559362	0.6312709	-0.04630804	-0.6768546	-0.42208338	-0.21674204	-0.5372157	-0.34076357	0.31244993	-0.35928583	0.28827143	0.62319994	0.04630804	0.05451727
A_23_P18913	0.45269012	1.1281738	1.736537	1.2977962	-0.8726988	-0.23624802	-0.48807144	-0.48749447	-0.7023964	-0.19846916	-0.5979538	-0.11429691	2.89072	2.526392	0.43813992	0.11429691
A_23_P420218	0.35741472	0.752233	1.2861271	1.0569968	-0.8198395	-0.33740044	-1.1486244	0.36660814	-0.99016905	-2.8900852	-0.4134612	-3.1732492	1.1605349	1.3717661	-0.25605297	0.25605297
A_23_P92025	0.21241212	0.115658045	0.2007606	0.19157338	1.0642569	-0.78882	-0.4883287	-0.115658045	-0.6642592	-0.9677985	0.12855077	-0.68407416	1.4026754	0.27205682	-0.75211406	-0.3835323
A_32_P187234	0.06274319	0.7373934	1.2534714	2.122229	-1.6130228	-0.06274271	-0.2650218	-0.6224098	-0.8944521	-0.8427801	-1.2747164	-0.85220623	2.024108	0.3150444	0.12443018	0.71446085
A_32_P204795	0.26136398	0.3928976	0.7213316	-0.57997894	-0.34403896	-1.356216	0.09689045	-6.902233	-0.09689045	0.67109585	0.18754196	-1.2087755	-0.42148256	0.9976196	0.14920902	-1.2519298
A_23_P156996	0.7049632	1.325645	-0.042288303	0.36426115	0.19344568	0.7245898	0.63766336	0.042288303	1.2095342	-0.29270506	-0.048306942	-0.6842437	-0.7834563	-0.82164526	-0.68193007	-0.074133396
A_24_P579439	-0.17273211	0.2886231	0.17273211	0.43495584	0.19276166	-0.24249864	-1.0246065	-0.735831	-0.9087417	-1.6715086	-0.9068501	-1.2415988	1.5542848	1.3360646	0.834306	0.4644735
A_32_P89827	0.33050585	-0.05014658	1.7864232	-0.11292648	-1.4524088	0.32389498	-0.24341917	0.44994307	-0.15872622	-0.45758963	0.30210733	-1.2030411	0.24133062	0.05014658	0.5941615	-0.11230564
A_23_P201538	1.2046332	-0.18658876	2.4347548	1.6143098	2.8905215	-1.022862	-0.5934119	0.18658876	-1.091517	-0.8890672	0.78201723	-0.37441874	2.3440423	-0.64518595	1.0721469	-0.775928
A_24_P366535	0.57994175	0.65150166	-0.3878584	0.55798626	-2.1114264	-0.3336687	0.015405655	0.3256426	-0.1655531	-0.015405655	0.38750362	-0.024656296	-2.0334787	0.6625242	0.22916889	-0.09336567
A_23_P113692	-0.01747322	2.9242034	0.017474174	3.1334562	2.4500256	-0.28891945	-0.023674011	-0.38846207	-1.0276566	-0.41932487	-0.827281	-0.3232441	0.7914114	0.6209259	0.5512037	0.1938653
A_23_P55518	0.3021388	0.7689872	-0.26473665	0.1483016	1.8083224	0.08857489	-0.030725956	-0.09056711	0.030725956	-0.86295176	-0.1271367	-0.7576318	1.4360518	-0.631444	-0.09458494	0.2735343
A_23_P219176	0.25780725	-0.14257765	-0.13118887	-0.17015123	0.67750597	-0.47860575	0.06181574	-0.019773006	-0.18668222	-0.35614347	0.019773006	0.08799696	0.84923315	0.17029905	-0.19391012	0.2945552
A_24_P263937	0.046747208	0.26328182	0.2985096	-0.1447897	-0.44934845	-0.23603058	-0.18805027	-0.027380943	-0.021541595	0.092764854	-0.083670616	0.6177969	-0.41619492	0.24907684	0.14753723	0.021541595
A_32_P181452	0.2045989	-0.106349945	0.3825946	0.029846191	-0.62378025	-0.029846191	-0.56115866	-0.57077694	0.38773394	-0.16159534	0.26171923	-0.19709206	0.72361946	0.05175495	-0.55853987	0.6236024
A_24_P236956	-0.5339308	-0.9612961	0.15457726	-0.9061632	-1.921895	0.19316101	0.14278221	0.25567436	0.15746975	0.37314796	0.07278824	0.24757576	-1.9195919	-2.1500015	-0.07278824	-0.29430962
A_24_P33048	-0.72526026	-0.56547403	-0.024579525	-0.78889704	1.3254933	0.2979455	0.09612036	0.08865595	0.106460094	-0.103675365	-0.27800894	0.1298747	1.514153	-0.5975294	-0.22395182	0.024579525
A_24_P304419	-0.062418938	2.6613507	0.7837281	0.062417984	2.7804265	-0.37164783	-0.49046898	-0.51664925	-1.1082888	-0.48281288	-0.9248848	-0.4010706	3.4052677	0.52130604	0.9951868	0.083180904
A_23_P65930	0.01248312	0.30642176	0.20597029	-0.15590143	0.37527132	-0.477242	-0.47483587	-0.1748395	-0.01248312	0.17334509	-0.2605939	0.115679264	1.1003385	0.36103487	-0.2469039	-0.08001375
A_23_P74653	0.60748816	0.075324535	0.017074108	0.51355124	-1.6231027	-0.3068595	0.09583521	-0.12856722	-0.3102212	0.19756079	-0.017074108	-0.31248522	-1.1980233	0.06999159	0.42221022	-0.20215464
A_23_P214059	-0.045068264	0.25144815	-0.67690325	0.42360735	2.387609	0.21980143	-0.36321115	-0.7900653	0.29040956	0.045068264	-0.9838748	-0.11474943	2.066297	0.50200033	-0.9458337	-0.2938819
A_23_P321959	0.06873512	-0.5047159	0.044867516	-0.14706707	-1.0464916	-0.9536152	-0.38259888	-0.005241394	-0.9028206	0.005241394	0.5816097	0.73882866	0.29089737	0.5283289	-0.40314674	0.4277296
A_23_P127322	1.4213686	1.4043512	2.8748403	0.93728733	-2.3366137	0.3591323	0.781095	0.07503557	-0.257195	-0.19185925	-0.45127773	-0.80276203	-1.9779496	-0.07503557	2.5682597	-0.2531953
A_23_P31006	2.6158943	-0.20131397	-0.07483387	0.22475433	-2.7538147	-0.43807697	-0.35466003	0.30087423	0.041565895	-0.041565895	-0.22623205	0.22913313	-1.3665352	0.5284443	0.30581093	0.62524414
A_23_P157669	0.25468397	-0.036868572	0.49359274	0.036868572	-1.2327952	-0.5958581	-0.26850367	-0.051804066	-0.5199914	0.13707495	0.3739915	0.454082	-0.41504622	0.4040761	-0.41720247	0.2542224
A_24_P29703	-0.18114758	-0.57000446	0.006196022	-0.056287766	-0.14559364	-0.3677454	-0.15167618	0.1551485	-0.25303078	0.32262135	0.16393948	0.28157806	0.62071323	0.19231796	0.03662777	-0.006196022
A_24_P289834	-0.0063154697	-0.4961822	0.01150012	0.049713373	-0.3534758	-0.3199818	-0.36900973	-0.17138076	-1.038398	-0.25819278	0.10480666	0.113147974	0.0063154697	0.3296826	0.14300323	0.3588364
A_23_P122052	-0.22144747	-0.23036814	0.12931967	-0.3759246	1.1216187	0.08958101	0.41220236	0.090409756	-0.2595725	-0.0901742	0.6378255	0.19016218	1.392942	-0.38446856	-0.38334894	-0.08958101
A_23_P120378	0.07194233	-0.25718117	0.131423	-0.07194233	-0.73309994	0.8752985	-0.35130692	-0.38784122	-0.89171505	-0.25491142	1.8274226	-0.17645931	0.8818631	2.239604	0.66125727	1.7729092
A_23_P77971	-0.26789594	0.023623228	0.086616755	0.053001165	-2.1483767	-0.06687379	-0.15175366	0.50831103	0.40269876	-0.7043812	0.06789374	-0.29352212	-0.99536586	0.46588635	-0.023623228	0.4001596
A_24_P257022	-0.0057475567	0.18829417	1.0062006	0.8987291	-4.2603283	0.052782774	0.0057475567	-0.17900681	-0.3035481	-0.2575214	2.6206214	-0.3589108	-1.604461	-0.16888213	1.0907018	0.48338008
A_23_P61919	0.62750006	-0.526752	0.31728792	0.030144691	-4.142332	0.40777254	0.3886695	0.48936558	-0.030144691	-0.11066532	-0.59181976	-0.08245945	-2.5275931	0.15150261	0.34010935	-0.06992149
A_23_P134454	-1.5374947	1.233871	0.27196074	-0.26301813	7.0023084	0.5216985	0.4428563	-1.240665	-0.26468992	-0.5452504	0.13195562	-0.25060797	6.9800305	-0.5108609	1.4414392	-0.13195562
A_23_P43765	-0.29600573	0.5349221	-0.21243906	-0.32001734	0.31231546	0.2881856	0.31505346	-0.3222537	0.35848665	-0.38872766	-0.8090663	-0.6026435	0.3247409	-0.21129465	0.21129465	0.37254572
A_32_P210622	0.18334389	-0.12986755	0.25637245	0.457304	0.057967186	-0.09424496	-0.27489376	-0.3175621	-0.76524734	-0.13970184	-0.59969234	-0.057967186	0.9631324	0.76059103	1.5991988	0.30119276
A_24_P100627	0.02276969	0.8682158	0.37531114	0.07597804	-5.8072157	-0.15110564	-0.021909475	-0.35626197	0.13377976	-0.045891047	-0.33875346	0.06806207	-3.2965572	-0.20256305	0.69697833	0.021909475
A_23_P16817	-0.3261428	-0.91396093	0.34504938	-0.29794645	0.98354673	0.6522651	-0.4960723	-0.22736788	0.030610561	0.6350131	0.26727057	0.5459628	0.2709937	-0.030610561	-0.27302408	-0.17832899
A_23_P125423	-0.7881999	-0.93783236	-0.019114971	-0.45524454	5.0086446	0.019114971	-0.17514944	0.10178232	-0.080224514	0.49443007	-0.8928151	0.51787615	5.960921	0.23891115	0.1062932	-0.1595931
A_32_P181593	0.09527588	0.6478467	0.8693423	0.7904644	-1.7173901	-0.09527588	-1.1242619	-0.79149723	-1.1938329	-0.960083	-0.8858013	-0.7019601	0.7090931	1.4992719	1.6339936	0.8698907
A_23_P257763	0.28766322	-0.65071416	-0.6556132	1.4515059	2.618292	0.59110665	0.075728655	-0.24090791	0.4237268	-0.1184752	-1.4312975	-0.59175515	1.8961294	-0.075728655	-0.21951509	0.1310327
A_23_P163787	0.032090902	0.14036298	-1.3898175	-0.010451555	6.666938	0.67055726	0.59843946	-0.74287105	0.010451555	-0.5300205	-1.0572784	-1.6172998	5.671015	-0.74787784	0.52617764	-1.6250713
A_24_P876152	0.2688055	-0.026866913	0.3567829	0.14360046	-0.60978127	-0.040332794	-0.23466682	-0.2787714	-0.66416645	-0.0599823	-0.5088196	0.026866913	1.0009594	0.79863787	0.7034216	0.6754546
A_23_P110433	0.30976963	-0.43867302	0.09072113	-0.044049263	-1.001811	0.018359184	0.0042419434	0.009419441	-0.056116104	-0.051530838	0.39101887	0.33955193	-1.1238232	-0.19682884	-0.0042419434	0.18741035
A_23_P145016	7.710457E-4	0.109484196	0.29778337	-0.28315115	-0.9109616	-0.0221982	-0.047872066	0.013328075	0.060640812	-7.710457E-4	-5.8344417	-0.2860875	-0.4380002	0.010266781	0.05743456	0.07779074
A_23_P94563	-0.3970704	0.0996356	0.19361734	0.66914797	-1.0992017	-0.43010283	-0.0996356	-1.2278571	-2.1064286	-1.5132432	-1.9554305	0.17566156	1.3303709	0.9461479	0.9892373	0.6486831
A_23_P53724	0.29410267	-0.31477118	-0.683136	0.17769814	1.3218818	0.43941736	0.6492915	0.13748455	0.3374219	-0.4483471	-0.37895393	-2.0983448	0.31019592	-0.3325715	-0.13748455	-0.3613882
A_23_P166848	-0.47176266	0.47312546	-0.25565815	-0.61528635	-2.0750513	0.109128475	0.8907871	0.038418293	0.085562706	-0.7815199	0.81688213	-1.1618471	-0.39479923	-0.016810894	0.2534504	0.016810417
A_32_P64286	-3.2748623	-3.556716	-2.7782216	-0.36714125	-4.1978903	0.74726677	0.08096981	1.7646942	2.2636175	1.2968755	-0.08097029	0.89574575	-2.5899825	0.738678	-2.886736	2.1074357
A_32_P112881	-0.09208298	-0.09910488	-0.049613953	-0.087854385	-0.38549042	-0.0957737	0.0146074295	0.20783997	-0.25572586	0.1944542	0.36127377	0.4125347	0.43049908	0.47799587	-0.0146074295	0.03602314
A_23_P96008	-0.27379608	0.21851921	0.19824505	-0.28229237	0.02314663	0.3277855	0.20505714	-0.02314663	0.6569853	-0.14778233	-0.2210741	-0.15218544	0.1823721	-0.30165195	-0.42792034	0.5226126
A_32_P155721	-1.934555	-2.210002	0.35216904	-1.1734266	0.6888256	1.0291257	0.12205362	1.5946255	-0.14263582	-0.111269474	-0.20684958	0.22493601	-0.164145	-0.8941698	0.3029499	0.11126995
A_32_P137632	0.24607944	-0.42739916	-0.23685503	-0.6087451	2.9172716	0.60819864	-0.48873758	-0.8452554	0.23685503	-0.33192682	-0.25860214	-1.3205943	3.4782867	0.5033212	1.1283884	1.1988235
AT_W_5	0.031482697	0.092004776	0.21148586	0.026553154	-0.5528946	-0.2506876	-0.20535088	-0.43702126	-0.16959095	-0.2912798	-0.46536446	-0.0265522	0.77338123	0.94172955	0.45343304	0.29128838
A_23_P97123	0.10543704	-0.16519237	0.5331862	0.74272513	1.7459943	-1.6512702	-0.9928472	-0.17888284	-0.1751349	-0.10543704	-0.22426105	0.2388227	1.3469265	0.34208894	-1.4990466	0.5628264
A_23_P69513	-0.19676113	0.022850037	-0.16226006	0.34852743	0.47253323	0.09986305	-0.48290062	-0.40061665	-0.022850037	-1.4022975	-1.3275862	-1.7662911	1.6143689	1.2918024	0.6195903	0.26859665
A_24_P195205	0.3903947	0.18801641	0.35506678	0.39478445	-1.9799638	-0.68213034	-0.7157378	-0.18801641	-0.38315535	-0.23483133	-0.37339067	0.22232485	-0.532969	0.80900717	0.60771894	0.5170264
A_24_P914208	-0.037558556	0.45273495	-0.04821205	0.009854317	0.108299255	-0.049448013	-0.009854317	-0.2940235	-0.4170637	-0.39151955	0.14916515	0.81392765	0.12912464	0.085142136	0.68589973	-0.1269474
A_24_P925709	0.6165161	0.04112625	-0.3831854	0.4403143	0.7730036	-0.24766636	-0.04112625	0.26436234	-0.49933052	0.056640625	0.23361301	-0.3927946	0.40488625	-0.10521555	-0.49458694	-0.54664373
A_24_P226755	0.060093164	0.12429643	-0.33534646	0.2234261	-0.1991136	0.16110635	-0.0136191845	0.38887906	0.5997107	-0.2539699	-0.0799129	-0.016324759	-0.7047007	-0.00568223	0.0828774	0.00568223
A_23_P83175	-0.45969057	-0.43325377	-0.30876255	0.7854872	3.8130655	-0.1474433	0.27544928	0.20808458	-0.15552711	-0.23047352	0.6658907	0.7955146	4.3274784	-0.1864233	-0.8503308	0.14744282
A_24_P322426	0.10382223	0.19752932	0.03019476	0.27563238	0.12860727	-0.47194242	-1.5249562	-1.1479754	-0.81188154	-1.2592459	-1.4819589	-0.89400053	1.2101846	0.9762559	0.2742772	-0.03019476
A_24_P522399	5.498679	-0.15364075	0.22584629	-0.014637947	-0.9205761	-0.29674625	-0.53374195	0.10805321	0.7642784	-0.26651382	-0.6716738	-0.17739868	1.3860884	0.50171566	0.39364624	0.014636993
A_23_P398947	-0.034577847	-0.23983622	0.004711628	0.09738493	-10.773434	-0.6818223	-0.042170048	0.88530207	0.025066853	0.21634722	-0.004711628	0.42285872	-9.174021	0.2474227	1.3226361	-0.21346521
A_23_P67661	-0.3742547	0.029332638	-0.029332638	-0.13754225	5.964644	-0.47602415	-0.38769674	-0.9234443	-0.47274446	0.2610011	0.74035025	0.7482476	6.405516	0.5807395	0.090835094	-0.12832022
A_24_P23951	0.8566632	-0.28577757	-0.4044299	1.0260406	-1.9146447	0.083378315	0.21320581	0.015024662	0.022012234	-0.015024662	0.20096922	-0.6785197	-1.7301402	0.14381552	-0.020264149	-0.025490284
A_23_P149998	0.12339091	-0.49974132	0.07594037	-0.6096628	2.484124	0.13205934	0.57064605	0.5033834	0.38659358	-0.2676165	-0.4207375	-0.07594037	1.7263496	-0.8086622	-0.15664172	-0.371423
A_23_P40433	0.9621749	1.0532651	-0.09062576	-0.40404272	3.0979476	-0.7011285	-0.92328787	-0.5422702	0.52948	-0.663919	-1.0653148	-0.5793004	3.5614038	0.09062576	0.6192832	0.8403106
A_23_P11507	0.045545578	1.0333862	-0.096595764	-0.045545578	0.50675297	0.9485626	0.8673792	-0.084858894	1.0077305	-0.15030193	-0.39399815	-0.38664436	-0.1914339	-0.53913116	0.18730354	0.44014168
A_23_P53397	0.05557108	0.06746435	-0.17920399	0.041338444	-0.4247241	0.2905469	0.17231417	-0.32066965	0.18712187	-0.3790636	0.2411294	-0.45209742	-0.44126225	-0.23210192	0.001850605	-0.001850605
A_23_P345799	0.22862625	0.36042738	0.7270503	1.0619216	-0.1633811	-0.58189106	-1.0340362	-0.6573696	-0.47921133	-2.4855623	-1.4713254	-1.5529032	1.2233596	1.3074951	0.1633811	0.25737667
A_23_P25097	0.4926796	-0.5260391	-0.049229622	0.0048971176	-1.1907568	0.22371864	0.24584007	0.11684513	-0.20254326	-0.0048971176	0.14276886	0.06850815	-0.5761595	-0.05920887	0.31440353	-0.1580801
A_24_P354451	0.02584982	-0.63827753	0.16168737	-0.15420961	0.39802122	-0.091712475	0.10095358	-0.14407587	-0.474957	0.4141984	-0.02584982	-0.04240656	1.7678494	0.06567526	0.082530975	-0.124483585
A_24_P85590	0.7961798	0.05176115	-0.27609444	0.11825991	0.26992464	-0.83389044	-0.35243368	0.7745042	-0.5079875	-0.06129551	2.4525714	-0.71873045	1.7608018	-0.05176115	-0.17813015	0.33201265
A_23_P155828	0.11371803	-0.46672153	0.4758854	0.15751076	-0.9437418	-0.44091034	-0.33944988	-0.31270695	-0.33272552	0.037870407	0.0038375854	0.13808727	-0.61842155	0.30818653	-0.0038375854	0.12482834
A_23_P106773	-0.008554459	0.19979382	0.2987032	-0.17020893	-1.4552345	0.16693115	-0.30152702	0.15530968	-0.091243744	-0.5117731	0.30427647	-0.08738804	-1.0310163	0.18052864	0.008554459	0.40414906
A_23_P385835	0.25733185	-0.314013	0.44370174	0.08975124	-5.0175743	0.6579385	0.39948273	-0.51043606	-0.08975172	0.11903381	-0.8152461	-1.6398993	-3.4463973	1.0740461	0.692502	-0.28001785
A_23_P76799	-0.14358902	0.37799072	0.2992525	0.17655087	0.21431446	0.10122681	-0.24753952	-0.5737133	0.050545692	-0.22580433	-0.9487486	-0.10924244	0.30297565	-0.050545692	0.72964954	-0.21691895
A_32_P50463	-0.92272806	-1.1553121	-0.3563466	-0.7517042	-1.5781126	0.6925039	0.08948183	-0.029672623	-1.9231968	0.60112	0.79168224	1.0188427	1.4288502	0.9857578	0.0296731	-0.09693909
A_23_P52109	-0.5058613	0.4643526	-0.011754036	0.5893297	-0.954968	-0.011059761	-0.86810875	-0.12816429	-0.110776424	0.08161688	0.24875069	0.017924309	-0.6797662	0.15725374	0.011059761	0.3118539
A_23_P204721	0.092473984	2.2311873	-0.092473984	1.3092136	0.14667988	-0.6312957	-0.60051966	-0.4807186	-2.0434766	-2.9576044	-3.3696947	-2.8632402	2.0945983	1.6014013	0.8825493	0.4005518
A_23_P255076	0.011133194	-0.30858898	-0.14537907	-0.43247986	0.76313305	0.21259403	-0.11808872	0.31432056	-0.08591366	0.05855179	-0.040488243	0.42153168	0.93334293	-0.07318592	0.37596607	-0.011133194
A_24_P921477	-0.33208466	-0.38610077	-0.08687115	-0.5945082	0.3146534	-0.89095306	-0.57431793	0.17389297	-0.38722897	0.18956375	0.25382614	0.79341984	0.9249096	0.30035686	-0.5295725	0.08687115
A_24_P216014	-0.3920951	-0.6115236	-0.10183048	-0.15391302	-3.193431	0.34498405	0.101830006	0.27249575	0.35016108	-0.42673683	0.12075281	0.6443291	-1.2098527	-0.17094421	0.7813368	0.24863958
A_23_P7201	0.2623663	-0.14280415	-0.0680666	0.073283195	-0.73468876	-0.32980442	-0.30913544	-0.1982851	-0.65672016	-0.266531	0.16176605	0.5641012	0.08232021	0.179842	0.0680666	0.3821888
A_32_P132169	0.5056083	0.8240049	0.52501035	0.69262004	-4.892869	-0.17295527	-0.2846496	0.4408338	0.17295527	-0.2929623	0.22103095	-0.18327546	-4.5064087	-0.2763369	-0.3161404	0.31438327
A_23_P105900	0.02613306	-0.02613306	0.2395711	-0.04612589	-0.8296647	0.513042	0.37682295	-0.06997347	0.3072524	0.15007162	-0.28861284	-0.08846712	-0.56971884	-0.16374254	0.06310034	0.25555944
A_24_P59506	0.21259117	7.864914	0.25325394	0.033224106	-0.5656204	-0.033224106	-0.16262722	-0.18784523	-0.7759266	-0.13867378	-0.5869198	-0.059025764	1.0430765	0.85548973	0.7764435	0.41437864
A_23_P402287	-0.046374798	-0.14763308	0.049709797	0.040812016	-1.9586377	0.41451502	0.110737324	-0.3674054	0.34026098	-0.040812016	-0.20295191	0.1287036	-1.789496	-0.37128687	0.14787245	0.15083933
A_24_P583225	0.4089446	2.990098	2.5665183	0.7450471	0.40311193	-1.1247368	-1.0408754	-0.06973934	-0.403934	0.0010943413	1.0235553	-0.7235422	-1.529572	0.45536327	-1.2470684	-0.0010948181
A_23_P314726	0.13936806	0.55934525	-0.59860325	0.3090887	1.5416613	0.07480049	0.11304188	-0.21855927	0.058751106	-0.32753468	-0.0707674	-0.45563984	1.0381193	-0.1836977	-0.058751106	-0.42739487
A_24_P241815	3.6967635	-0.3990698	-0.44248343	0.54539204	4.316671	0.1941657	0.067883015	-0.39732075	-0.067883015	-1.0082917	-1.5080743	-1.9774222	3.9948545	0.8386922	0.4783802	-0.48081923
A_23_P37623	-0.5107131	0.39059544	0.35752678	-1.0195737	2.3566008	0.9042959	0.406065	1.134489	0.3468666	-0.4140625	-0.5897846	-1.3386126	1.2407284	-1.6631899	-0.3468666	-0.47662783
A_24_P932451	-0.038067818	0.047828674	0.3047433	-0.21736383	-0.78592825	-0.7569337	-0.32790613	0.30520582	-0.27538204	-0.21052647	0.69036627	0.3563552	0.03806734	0.16439295	-0.3368206	0.28225422
A_32_P58029	-0.85454845	-0.312953	-0.33663273	1.6239443	5.0426664	0.37324	-0.39786148	0.382905	0.31295347	-0.94651127	-0.44498014	-0.4005556	3.912558	-0.46625566	1.3394637	0.56989765
A_23_P315451	-0.83501244	-0.832654	0.12735939	-0.56238174	-9.280648	0.3013363	0.12827969	0.42442226	0.31285858	0.08434963	-0.5183668	-0.57489014	-5.674027	-0.07306957	0.07306957	0.17359924
A_23_P358944	-0.15603828	-0.0024986267	0.46456337	-0.12168217	0.997715	-0.27282047	-0.32323742	-0.3786087	0.28463078	0.1439066	-0.02646923	0.10379028	1.5610666	0.0024986267	0.107421875	-0.0035524368
A_23_P214432	-0.5695653	-0.66073275	0.19640684	-0.62189007	-0.007894039	0.44674444	0.14776564	0.007894039	0.5549536	-0.2813201	3.5893788	-1.5905719	1.0536666	-0.104332924	0.07108545	-0.23365259
A_24_P765923	-0.3621955	0.2520914	0.108325005	0.0455184	3.0083723	-0.75491476	-1.5130897	0.2245903	-3.0308285	-2.5726013	3.7781115	-3.1583357	2.1690226	0.21262074	-0.089530945	-0.0455184
A_23_P68436	0.1289978	1.1530914	1.1419749	0.7671981	-1.6505442	-0.1289978	0.46256685	-0.42300224	-1.784832	-1.1516399	-1.6150284	-1.0724573	2.0394711	1.9042068	1.0990839	-0.6194186
A_32_P86616	0.071834564	-1.3695016	0.2819047	-0.94161844	-1.0800133	0.822752	-0.009521484	-0.29026031	-1.0196495	0.47492838	0.009521484	0.5249691	1.0038943	0.5871291	-0.4270749	-0.54177284
A_23_P333683	-0.045084	0.34819746	-0.49817944	-0.63840866	2.7869215	-0.34844017	0.20429373	0.03677988	0.48955536	-0.4728098	-1.0216017	-0.45953274	1.9767723	-0.03677988	0.43397856	0.15063429
A_24_P247861	0.06441212	-0.246418	0.13724041	-0.06441116	2.1627383	0.086265564	-0.2737007	-0.43921947	-0.8830824	-0.256629	-0.7175808	-0.17559719	3.4509258	1.2028065	0.54667807	0.17840958
A_23_P109001	0.40696716	0.39570427	-1.2276196	0.06304455	-0.7920947	0.7590723	1.0305471	0.2847681	0.68531036	-0.06304455	-0.09217453	-1.0950398	-1.4827394	-0.38604784	0.6465864	-0.30758524
A_23_P30983	-0.15096712	-0.16575098	0.6135173	0.31148624	-6.4636607	-0.3334551	0.03545904	0.017251492	-1.076766	0.35371828	-0.017251492	0.7527776	-4.850803	0.25173235	1.641192	-0.38769865
A_24_P196307	0.1825304	-0.12079716	0.26183033	0.056894302	-0.6720362	-0.10904884	-0.2980404	-0.3416729	-0.7580881	-0.14015388	0.07746124	-0.056894302	0.9402027	0.73717165	0.6433959	0.27359295
A_23_P137434	-0.57506084	-0.5050039	-0.23203754	-0.38979435	0.18895054	0.7239342	0.6140423	0.22282696	0.10125065	0.22873211	-0.35662556	-0.0039920807	0.9663944	-0.3179369	0.0039920807	-0.2413969
A_23_P160406	-0.18693638	0.06469154	0.38589382	-0.1137104	-0.45284176	-0.036161423	0.28012657	0.020043373	-0.22865486	0.22551918	-0.12203884	0.0614748	-0.21558952	-0.020043373	0.5163231	0.23409271
A_32_P118568	-1.1035614	-0.35382986	1.0173626	-1.0691009	0.09340477	-0.03157091	0.21952534	0.03157091	0.43556595	0.3820753	-0.22505093	0.37907314	-0.83233976	0.1689372	-0.9239507	-0.31795073
A_23_P373584	0.26734734	-0.026138306	0.35505867	0.14471626	-0.6143913	-0.04317665	-0.23961735	-0.28283882	-0.66448784	-0.0599308	-0.5092335	0.026137352	1.4902191	0.79418135	0.6982522	0.32632828
A_23_P139123	0.32640266	-0.14864159	-0.7991266	0.16044426	3.7859592	-0.25527287	0.22955608	0.29906273	-0.038243294	-0.050252914	0.035876274	0.07431221	2.539791	-0.035876274	-0.8007169	-0.4254241
A_23_P106080	-0.20153236	0.09293461	-0.5878959	-0.24217796	-1.2458315	0.18892813	-0.21583176	0.3097043	-0.11642027	-0.09293413	0.7917018	-0.4280138	0.90815496	1.6203928	1.2276158	0.7640209
A_23_P109235	0.40552855	-0.27941847	-0.7295718	0.32668257	0.41752863	-0.5574956	0.047767162	0.2112422	-0.047767162	0.10071421	0.1383748	-0.5190406	-0.33046007	0.10468054	-0.42267275	-0.24741697
A_32_P171793	-0.15301704	-0.49061966	0.45650673	-0.047896385	1.8728018	-0.63983965	-0.40238047	0.013473511	-0.82838583	-0.013473511	0.15440655	-0.21303415	2.94139	0.1631012	0.03354597	0.41376257
A_23_P109269	0.24499178	0.06932211	0.58584356	0.89103174	-1.2063823	-0.4110322	-0.7239003	0.20223284	-0.3798871	-0.5365739	0.22940207	-0.48761225	-1.320292	0.043770313	0.1179204	-0.043770313
A_24_P147461	-0.052742004	0.5958109	1.4170828	-0.009967327	4.2255273	0.009967327	0.19407606	-0.86452436	-1.0002699	-0.6130662	1.3205247	-0.29697943	4.634629	0.8767967	-0.76728964	-0.3121481
A_24_P752362	0.5435376	-0.13201952	0.87756586	0.22966051	-3.1226068	-0.29410124	0.2978921	-0.021622181	-0.16836405	0.021622181	0.15548372	0.056602	-3.169855	-0.6064019	0.21009874	-0.18026114
A_24_P284584	0.14135313	1.0193028	-0.027351856	-1.846138	-0.26099634	0.52302027	0.2696948	0.13438272	0.3323264	-0.48508024	-0.6149478	-0.88551855	-0.349041	-0.7354059	0.2568593	0.027351856
A_23_P352799	0.05287075	-0.016366482	0.016366482	0.22613811	-0.79349756	-0.74728775	-0.35875034	-0.7123604	0.16057348	-0.956738	0.1434102	0.04737425	-0.21619034	0.26952505	-0.59040356	0.3728733
A_24_P913096	-0.333735	-0.60545874	-0.22824097	-0.4534297	-0.08803463	0.037319183	1.0164266	-0.020131588	0.82316446	-0.47363138	0.6095357	1.4316268	0.6635575	0.789937	0.020131588	-0.052449703
A_23_P62255	-0.41591835	-0.396235	1.4526739	-0.34764433	-3.8883133	1.2478142	1.3578277	1.0353761	0.6693187	0.015481472	-0.015481472	-1.8776007	-2.282124	-0.84279823	1.0611529	0.6028786
A_24_P936875	-0.048536777	0.38541555	0.14609146	0.5496359	-0.22179651	0.048537254	-0.5768137	-0.27844763	-0.19387102	-1.977078	-1.10991	-1.3389354	0.959218	0.9736028	0.52318525	0.1826787
A_24_P145333	0.09338617	-0.68631554	0.75685596	-0.09338617	1.3340869	-1.0953937	-0.9214754	0.96810484	-0.758749	-0.5844245	0.50112486	-0.20639515	0.7178211	0.23338747	0.71555233	-0.54734564
A_23_P366426	0.40583754	0.0012311935	0.3773017	0.14708138	-0.72218704	-0.11299324	-0.33785343	-0.35966682	-0.64142704	-0.09134674	-0.5081005	-0.0012311935	0.8826108	0.69436693	0.5909219	0.2123661
A_32_P823874	0.059622765	-0.20417309	0.17196846	-0.05962372	-0.9361534	-0.32407093	1.4551449	-0.57071114	0.81466293	-0.30043602	-0.7149973	-0.2104969	0.6680765	0.55900526	0.3771968	3.901894
A_23_P120845	0.0013875961	0.5412159	0.2510481	0.14871216	-0.2526846	0.22970581	-0.0013875961	-0.20506573	0.31414604	-0.19279957	-0.40873146	-0.4886856	0.3126583	-0.25399494	-0.19805336	0.31973457
A_24_P289106	-0.25351143	0.37355232	0.09325981	0.0010242462	1.1404839	-0.0010242462	-0.5392313	-0.41820717	-0.70743465	-1.2646036	-0.8694782	-1.093565	0.86584854	0.74355507	0.2312975	0.21403122
A_23_P64051	0.18304348	-0.50383854	-0.15963364	0.026137352	-6.006739	0.30242062	0.24180412	0.3155756	-0.026137352	0.07707691	0.10544968	-0.8568077	-7.1346183	-0.7027807	0.29394817	-0.3361349
A_24_P108401	0.5415063	-0.06814337	0.06814337	0.4551711	1.9094129	-2.5966802	-0.6925101	1.0865664	-1.3568645	-2.6255078	1.7076411	-0.31439066	-0.6826291	0.9116082	-2.6780334	0.303576
A_23_P105144	0.5290046	0.20650339	-0.7849288	-0.087994576	1.8267155	-0.55694866	-0.2528453	-0.7560406	0.1663866	0.087994576	-0.88146687	0.6096101	1.6125059	0.14672422	-0.7911873	-0.6020789
A_32_P37988	0.18859959	-0.06959915	0.30877066	0.06959915	-0.3302765	-0.21803474	-0.45961094	0.21423149	-0.70854187	-0.18420792	-0.58970547	-0.09753895	1.1130667	0.6456685	0.46734333	0.58347034
A_24_P350499	0.004257202	2.28611	0.12566948	-0.11490536	1.7254438	-0.4056368	-0.6497202	0.8673973	-0.89150333	-0.3704195	-0.004257202	-0.28456974	0.5618081	0.38833332	0.27707767	-0.10105324
A_23_P63696	-5.187988E-4	0.2920065	-0.143754	-0.02728653	-0.09163475	-0.41375446	0.067352295	5.187988E-4	-0.033620834	0.07807827	0.10904884	-0.12024784	0.33431435	0.15895653	-0.64119625	0.30136204
A_24_P63563	0.13138533	0.36105967	-0.15131235	-0.3068261	-0.29020548	0.30473948	0.50085783	0.41773176	0.704762	0.26185465	0.015960217	-0.10472727	-0.36662912	-0.15404654	-0.015960217	-0.075900555
A_23_P65733	0.2224114	0.43628526	-0.19029641	0.25116467	-0.31104875	0.05293584	0.23701978	-0.4527266	-0.24817204	-0.8532655	-0.05293584	-1.0693052	0.15789056	0.42610717	0.2821648	-0.0952065
A_23_P161998	-0.37219524	0.582427	0.37608147	0.5047822	0.9513993	-0.33955097	-0.6058459	-0.13871336	-0.88307333	-2.3628464	-0.83363914	-1.6335311	1.6275196	1.3494296	0.13871384	0.20752144
A_23_P27256	-0.26560163	0.16412973	-0.10880709	-0.067332745	1.7236857	0.032090664	0.22734594	-0.032090664	0.2434144	-0.078299046	-0.038616657	-0.17402506	2.141417	0.13583326	-0.1295085	0.63748217
A_32_P94354	-0.10834122	0.030399323	0.63422203	0.6139846	-0.08441639	0.3995204	-0.64880896	-0.1967578	-0.91652155	-1.1356091	-0.63792133	-0.030398846	1.9589996	1.5250211	0.60172033	0.61329985
A_23_P17739	0.37971973	-0.054903984	-0.14635944	0.34852314	-1.4331617	0.054903984	0.28716564	0.21854687	0.11627674	0.15919495	0.43575096	-0.30806732	-1.7244616	-0.15181541	-0.42130375	-0.19616127
A_23_P395609	-0.19844985	0.2251389	-0.2970159	-0.16623187	1.4237711	0.49265695	0.32567906	-0.33629537	0.32798314	0.56011605	-0.45784545	-0.73017097	1.3704417	-0.46253562	0.15299058	-0.15299058
A_23_P22854	0.45326805	0.5093479	-0.4810052	0.6433716	2.0194926	-0.3567567	0.25333548	-0.56047535	-0.59382105	-0.19518709	1.2450633	-0.36635685	1.5560241	0.19518709	-0.99263716	-0.5445795
A_24_P100613	-0.081766605	0.081766605	-0.75562763	0.4032941	0.33173227	0.314919	0.27204275	0.08904028	0.4076047	0.17985296	-1.1245284	-0.9141011	-0.7428217	-0.7257705	-0.8546715	-0.27741003
A_32_P6107	-0.13147926	0.3337164	-0.4960289	-0.49848557	1.8220367	0.52151537	0.87309694	-0.112466335	0.7241783	0.11246586	-0.96459866	-1.410974	1.2261901	-0.5133419	-0.74213266	0.57871294
A_24_P710270	0.7304807	0.29058313	0.3421111	0.45068598	-1.2633586	-0.09239864	-0.22652578	-0.09473562	-0.14880419	0.22231865	0.42998362	-0.20877028	-0.80920076	0.25331688	0.09239864	-0.27427864
A_23_P77192	0.29444695	0.014752388	0.43621635	0.16867638	-0.77174854	-0.13242817	-0.40401936	-0.41297436	-0.5775089	-0.08228874	-0.50379467	-0.014751434	4.535343	0.65398455	0.51510334	0.15540314
A_24_P307993	-0.4689541	0.084795475	-0.084795	-0.16170025	1.6015396	0.91893435	1.2830644	1.4548268	1.2291346	-0.35611105	0.9464712	-1.1581082	-0.45297432	-1.491075	-0.46914864	0.46844292
A_23_P44363	0.50321555	0.57571006	0.28207326	0.82313323	0.34033465	-0.26685023	-0.05628085	-0.34028077	0.003421545	-0.45501208	0.11150336	-0.26711106	-0.2058971	0.08176923	-0.1734569	-0.003421545
A_23_P774	0.5258403	0.2674117	-0.06972265	0.3016038	-0.21082163	0.03867674	-0.03867674	0.21845675	0.13738394	-0.4528594	0.14921713	-0.69417334	-0.5490527	-0.18752337	0.18386602	-0.18263674
A_23_P97296	-0.09548235	0.28809595	-0.046602726	-0.313807	0.6102357	0.008119106	-0.23369074	-0.008119106	-0.26098108	0.37646437	-0.10797548	0.29729033	1.259768	0.063896656	-0.23694181	0.06973791
A_23_P109774	-0.21561909	-0.28456783	0.09759045	-0.33703613	0.11286068	1.1041965	0.9691839	-0.063669205	1.0078669	0.04994583	0.03973961	-0.03973961	-0.39876556	-0.90192986	-0.12010765	0.048677444
A_24_P383267	2.699821	-0.78510666	-0.37862778	-0.049252987	-0.30396843	0.8217206	-0.76324177	0.049253464	-0.14623928	0.8035345	-0.5718765	-0.70284843	0.41005993	0.23290157	0.1580143	1.1125336
A_23_P313560	0.27821302	-1.3444772	0.68479013	0.7372012	0.3947091	-0.3627448	-0.6263728	0.019004345	-0.4643035	-0.19371462	0.17593336	1.1597943	-0.41770315	-0.019004345	1.8721166	-0.13997316
A_23_P64854	0.24078369	-0.12440109	0.27635384	0.041766167	-0.5327654	1.0223217	-0.118831635	-0.14256382	-0.14838314	-0.12535	-0.56192875	-0.041766167	1.7193775	0.8872318	1.0355592	0.70107985
A_24_P378987	0.020442486	0.00572443	0.0038228035	-0.059719563	-0.04288149	-0.4193616	-0.09488058	-0.09715605	-0.03156805	0.12377787	0.25758028	0.43526316	0.60335875	0.44605112	-0.45486498	-0.0038228035
A_32_P30693	0.061457157	0.039111614	0.26796627	0.3682804	-3.1104317	0.30171442	0.05921507	-0.40864563	-0.50083685	-0.033278465	-0.63301325	-0.85229445	-1.4522572	0.033278465	0.68399	-0.25293064
A_23_P208393	0.10933256	3.344616	-0.10933304	0.62733984	0.61818933	-0.67498875	-0.7923608	-0.457129	-0.7572012	-0.9340687	-0.45846605	-0.6221299	1.2935362	1.0395741	0.23902702	0.34625196
A_32_P198325	0.08824396	-0.13069582	0.2502494	-0.19833231	0.4598899	-0.3077302	0.012653828	0.5180707	0.24161196	-0.14019632	0.16382456	0.085234165	-0.5212817	-0.012653828	-0.95669127	-0.06429243
A_24_P173790	0.03690529	0.506639	0.063010216	-0.03690529	0.05492735	-0.8271985	-0.6428466	-0.20794868	-2.1004066	-1.6863818	-1.7302508	-2.3060365	1.533773	1.5284905	0.94627714	0.6742339
A_23_P77043	0.8303952	-0.375525	2.0952759	-0.35953665	-0.978333	-0.440351	-0.5840211	1.2170749	0.49757433	-0.53585863	-0.9921956	-0.458714	0.63333607	1.4015155	0.35953665	0.43878078
A_23_P169619	0.62060547	1.0491381	1.5111241	-0.34844446	-0.622056	-0.28383064	0.051598072	0.74497557	-0.3161373	-0.4217949	0.3573389	0.09163427	-0.051598072	-0.6816664	-0.24051428	0.23028517
A_23_P322076	0.8139	-0.29029417	0.61201715	0.5974951	-1.1928382	0.039702415	-0.039702415	-0.6637149	-0.2832446	-0.13142061	0.5027609	-0.19772339	-0.48753548	0.35375786	0.8324418	0.06065035
A_23_P330895	1.5584805	0.95513654	0.22538638	1.5451043	-0.33698297	-0.9342625	-0.48649144	-0.47591376	-0.51462054	-0.26190782	0.27534413	-0.18790746	-0.87352204	0.674772	0.79061437	0.18790746
A_23_P121253	-0.11411619	0.33767843	0.11411619	0.61818504	0.1524086	-0.6460614	-1.281282	-1.3633733	-0.6270795	-1.2083955	-0.9583626	-0.5962577	2.7962294	1.3514085	0.69242764	0.5763664
A_23_P16609	-0.32446432	0.58491755	0.18158674	0.2813363	-1.1752687	0.21858835	-0.17965937	-0.62640524	0.29383516	-0.19646597	-0.39143515	-0.2779584	-0.86000586	0.38780737	0.49136305	0.17965937
A_32_P140220	-0.32823658	0.034089565	0.17125082	1.555222	0.5935159	-0.2691474	-0.48556137	-0.2877879	-0.03408909	-0.99348736	-0.58461285	-0.50391054	1.141787	0.27900124	0.15145159	0.23996735
A_23_P103661	-0.0024838448	0.60152483	0.026853085	0.0024838448	-0.61528254	0.6135869	0.36063623	-0.21753359	0.59335184	-0.13872004	-0.59084463	-0.42517233	-0.31356573	-0.18660021	0.32036734	0.6859927
A_23_P123608	-0.4691491	0.436553	-0.4152875	-0.47708035	2.8388247	0.40055084	0.26365137	0.0259099	0.32025528	-0.53095675	-0.29724407	-0.3664546	2.0427718	-0.74516344	0.4809699	-0.0259099
A_24_P935054	-0.1425054	0.36543965	-0.39324784	0.1425054	0.8747122	-0.6557133	-1.0632222	-0.8424604	-1.8772442	-1.1577055	1.4644053	-2.2598355	1.9446704	0.8468015	0.5725806	0.53287864
A_23_P425332	-0.22865868	-0.32556057	0.10707283	-0.27285957	-1.768044	0.17389202	0.041744232	0.02524376	0.36143112	0.02020359	-0.3274498	-0.123723984	-2.032435	-0.02020359	0.33349228	0.48641586
A_23_P87041	2.403791	-0.34045506	0.041932106	-0.15454674	2.277421	-0.041932106	-0.47086143	0.46034384	-0.9776602	-0.34357738	-0.5741224	-0.2648983	0.767776	0.5657797	0.47478104	0.10744524
A_23_P36962	0.5701928	-0.3944497	-0.6011591	0.3095212	0.9431348	-0.9671221	0.05592966	0.4768176	-0.9290986	-0.4368825	0.07010603	-0.05592966	0.4485507	-0.6378813	0.92572737	-0.55831766
A_23_P17490	-0.23793888	0.6007776	-0.34096336	-0.31068897	0.62602425	0.022144318	0.27532387	-0.12382126	0.37157536	-0.1849575	-0.39455414	-0.022144318	1.0326557	-0.08997345	0.27199936	0.145648
A_24_P7232	-0.12580013	0.568645	0.12580013	0.4967823	0.80921793	-0.69003916	-1.171205	-1.0564542	-3.901022	-2.4149418	-2.447607	-1.6373615	1.8944783	1.6055756	0.8747287	0.76508236
A_23_P94494	-0.077305555	1.4308298	-0.23987222	-0.6264231	3.1381738	0.6478293	0.26300406	-0.49329162	1.1442335	-0.16573644	-0.9143083	-0.2731254	2.5001934	-0.15200591	0.077305555	0.27306437
A_24_P290188	0.060403824	0.4260378	0.016405106	-0.17395496	-0.57449055	0.16941738	-0.11670208	-0.21167564	0.21507835	-0.5171461	-0.6580467	-0.3360777	0.14950085	-0.016405106	0.52904415	0.7220745
A_23_P367420	-0.050930023	0.5077009	0.25545883	0.5729704	0.67168045	0.050929546	-1.7414994	-0.86879826	-3.119423	-2.4692402	-1.4793186	-2.4183931	1.9026461	0.848083	-0.05201626	0.89443827
A_23_P81219	0.052354574	-0.35835052	0.72577214	-0.052354574	2.164684	-0.49334168	-0.3217857	-0.13314128	-0.8733275	0.08674979	0.3413756	0.1863668	4.0028133	-0.2579925	-0.25891423	0.12085652
A_32_P8971	-1.4660163	-1.0402465	0.19363642	-0.72434664	-0.15704584	0.16040945	-0.15925837	-6.8616867E-4	-1.7240472	0.8079896	0.2758956	0.80092573	1.7911115	1.1296668	6.8616867E-4	-0.6003823
A_23_P68138	-0.32852745	-0.025735855	0.025735855	0.3697114	2.3755403	-1.0674	-0.939167	0.25404978	-2.396122	-3.1799555	-1.9657292	-3.0953093	0.610651	1.5494385	1.3490572	0.8959856
A_23_P304311	0.26618576	-0.025453568	0.35361385	0.14581013	-0.6189041	-0.045799255	-0.24432564	-0.2866354	-0.41052628	-0.05990982	-0.50961685	0.025453568	0.99169827	0.7895546	0.6932144	0.3207636
A_24_P342279	0.80058193	-0.7721901	-1.126133	1.3089495	1.0392632	-0.50656176	-0.45666265	0.90463924	-0.07963276	0.079633236	0.83516884	0.588573	-0.7114773	0.9432092	-1.1249962	-0.09738588
A_23_P124823	-0.011097431	-0.70575094	-0.59936094	0.011097431	-0.9465966	0.055977345	0.55661726	0.8428092	-0.27045965	0.4240718	0.3318019	0.74098825	-0.78691435	0.30912733	-0.38922167	-0.048707485
A_23_P123454	0.25514555	0.18200445	-0.29809618	-0.18200493	5.106848	-0.35043716	-0.482934	0.182199	0.54650974	0.315279	-1.2355347	-0.1931901	4.87992	-0.22492695	-0.20668316	0.35439873
(-)3xSLv1	0.24608898	-0.020640373	0.29578495	0.18917465	-0.6226721	-0.009986877	-0.22590828	-0.21732521	-0.6701412	-0.028378487	-0.5004368	0.009986877	0.9829893	0.8313923	0.67726946	0.3243065
A_23_P205428	2.10286	-1.3084855	-0.21103716	0.46157694	-2.7803583	1.4027562	1.9248309	-0.17942	1.6590071	-0.53210926	-0.4251485	2.874981	-0.79318094	3.3206573	-1.4695125	0.17942047
A_23_P134225	0.2341814	0.44350338	0.119460106	0.5510664	-2.893979	-0.24750328	-0.119460106	-0.42818928	-1.180069	0.42368603	0.23762894	0.8806219	-2.7113929	0.6553812	-0.35132122	-0.22884178
A_23_P430068	-0.053967953	0.15181303	0.42703104	-0.08986139	-5.666092	-0.07040739	0.35139894	-0.0057997704	-0.12727499	0.09586573	7.7676773E-4	-7.7676773E-4	-3.3469052	0.24432898	0.5127349	0.34094763
A_24_P921260	-0.44232368	-0.5174694	0.2925272	-0.067718506	-1.2704334	0.17023468	-0.1020937	0.2255745	0.20262337	0.28614998	-0.54591465	0.26659584	-0.71427536	-0.078347206	0.067718506	0.17024899
A_24_P337239	0.26383495	-0.008301735	0.36693192	0.14573193	-0.6897783	-0.09325409	-0.30925083	-0.34017944	-0.6511326	-0.08071518	-0.50952435	0.008301735	1.2737503	0.7224617	0.6214981	0.24453449
A_32_P26017	-0.9246557	-0.5029137	0.3248756	-0.13727784	-0.5671027	1.0144913	0.035063982	-0.71492934	-0.8470347	0.25620484	-0.110924006	0.1328032	1.481334	0.88276076	0.2705381	-0.035063982
A_24_P396167	-0.38030815	-0.6489649	-0.27427006	-0.49813747	-0.13077116	0.43399286	0.5412617	0.13077164	0.48654366	-0.7295971	-0.6433315	-0.6404238	1.4347434	1.4801192	1.3312855	0.49765873
A_24_P521544	-0.0055441856	0.060979366	0.11562395	0.10394812	-2.2586637	-0.94002295	-0.70679045	-0.15005922	-0.85782003	0.0055441856	0.17164755	0.44629908	-0.5083432	0.87239885	-0.008443356	0.61592054
A_23_P14482	-0.001958847	-0.35023785	0.47481346	-0.07559013	-1.7075567	-0.14930248	0.048145294	0.07334709	-0.4548378	0.24343681	0.13047314	0.4648304	-0.6469526	0.17560768	-0.16858292	0.001958847
A_23_P58321	-0.37299395	0.36356306	-0.13951445	-0.3082862	-3.8752618	-0.017197132	0.2624612	-0.18427801	-0.01964426	0.027745724	0.3347907	0.42274904	-3.5614595	0.1381774	0.041008472	0.017197132
A_24_P326511	-0.47285414	0.6454406	-0.17375326	-0.25302458	-3.938507	0.5678725	-2.1558776	0.25797606	0.5787587	-0.07904959	0.09325647	0.373919	-1.8841672	-0.22480011	0.07904959	0.08872557
A_32_P43372	0.12048578	-0.80477667	0.34646082	1.1770849	0.45328665	-0.13938951	-1.7271972	0.17246532	-0.9435005	-1.4678988	-0.2822547	-1.3797421	1.2033744	1.1049104	0.87765265	-0.12048578
A_32_P139338	0.1815424	-0.2781868	0.09620476	2.0994167	-1.0313902	-0.41088867	-0.6449194	0.5256953	-0.9207525	-0.3814602	1.0168409	-0.29376316	0.5719142	0.48976994	0.2827797	-0.09620476
A_24_P41706	3.1019626	-0.2794981	0.09537411	1.8506155	-1.0403299	0.41128922	-0.64557076	-0.66453743	0.4506874	-0.38578224	-0.79623795	-0.2985983	2.0782504	0.3813281	0.27420664	-0.09537411
A_23_P348194	3.7417417	-0.271554	0.10379982	0.3140726	0.46467686	-0.41335964	-0.652153	0.5224037	-0.8609228	-0.3806162	-0.78973293	-0.2940817	2.0170078	0.38326168	0.27497578	-0.10379982
A_32_P834652	1.1387339	-0.48782253	-0.11183548	-0.34731007	0.49386215	-0.63358116	-0.8748064	0.604373	-0.052227497	-0.59928226	0.56721926	-0.5134554	0.7678757	0.16150999	0.05222702	0.49159336
A_23_P164912	-0.38892126	-0.61881685	0.21500349	-0.8084092	0.8596854	-0.43265963	-0.33261347	0.23838663	-0.116383076	0.2288146	0.42652178	0.116383076	1.5042968	0.16669989	-0.41540575	-0.1970048
A_23_P87603	0.6391139	0.8651395	0.052499294	0.65154314	-0.91088915	-0.5783515	-0.5025554	-0.35254812	-0.022099972	-0.21464777	0.31039095	0.15960646	-1.1464038	0.25552893	-0.15335798	0.022099972
A_23_P50735	0.27193475	0.89543366	4.4894218E-4	-0.24699473	0.23911023	1.238231	0.76002336	-0.46464372	0.8961909	-0.16830134	-0.28688216	-0.6766541	-0.20463681	-0.64431024	0.36923575	-4.4894218E-4
A_32_P69492	-0.72248983	-0.1352272	-0.007514477	-0.23363972	2.222354	-0.6196871	0.007514477	-0.035061836	0.38952255	1.3795805	-0.3356533	0.8729491	2.7462902	0.96029806	0.06233263	-0.19130182
A_24_P378368	0.0038108826	0.23032093	-0.7354078	-0.0038108826	1.5407028	0.42273617	0.45986557	-0.8282709	0.1220808	-0.67018414	-1.5162458	-1.8803906	1.2255363	-1.3595247	0.043469906	-0.8247566
A_32_P106669	-1.3019319	-1.0851598	0.20375109	-0.7071161	-0.55059195	0.85693073	0.22079945	0.03334236	-0.78225994	-0.033341885	0.18117905	0.9715414	1.333498	0.11863899	-0.46657562	-0.7122283
A_24_P59111	0.51035833	0.72692966	0.5887127	2.6554084	-1.970583	-0.415071	-0.96792316	-0.37256575	-0.92659473	-3.010459	-1.5166693	-1.411066	0.71077394	1.4481778	0.90033054	0.37256527
A_32_P95960	2.5549917	0.020018578	0.41351938	4.24472	-0.7854433	-0.14101124	-0.40355968	-0.40151978	-0.60027695	-0.09563255	-0.5045557	-0.020018578	0.80105495	0.6444473	0.5206666	0.14943695
A_24_P171141	0.2852373	0.01966381	0.41690445	0.16466999	-0.7848816	-0.14020538	-0.40474892	-0.40353203	-0.59676933	-0.093709946	-0.5044069	-0.01966381	0.7989445	0.6448469	0.51874685	1.5994072
A_23_P327499	0.21404028	-1.0026178	0.20118093	-0.6976824	-3.3229609	-0.41448736	0.53394985	0.24718189	-0.20118046	0.5908365	0.7574005	-0.8408742	-1.7420797	-0.30028915	1.165021	0.25337029
A_23_P150281	-0.020839691	-0.849308	-0.70897484	0.38576317	1.4938831	0.6554222	0.86489105	0.66279507	-3.7584848	0.020839691	0.022927284	-0.39425278	0.42793941	-0.33220673	-0.3751135	-0.3135872
A_24_P134683	0.42814112	0.25403357	-0.18623781	0.6760268	0.22151423	0.036332607	-0.38280725	-0.19867373	-0.49188185	-0.12933397	-0.1126523	-0.27719355	0.7733302	0.4525075	0.37927198	-0.036332607
A_23_P129225	-0.2402339	0.5694165	1.7757044	2.271731	0.2148881	-0.38717508	-0.93780375	-0.9449773	0.018303394	-0.61530733	-1.0370965	-0.5480199	3.6972399	0.1188035	-0.018303394	0.56895685
A_23_P408996	0.040616035	-0.25164032	0.83741856	-0.32829285	-1.5640278	0.26254368	0.098773	0.12945175	-0.040616035	-0.42894077	0.31814098	-0.59108925	-0.5110407	-0.33790588	0.3717518	0.4850893
A_23_P160862	-0.0765686	0.3365345	0.04974556	0.06627846	-2.2465858	0.29788113	0.23682594	-0.15355492	0.05650711	0.18665218	-0.2802086	-0.37164974	-2.1983366	-0.25094986	0.45239735	-0.04974556
A_23_P502654	0.6346431	0.951036	0.083316326	0.35838842	-1.5248427	0.18697786	0.15474844	-0.22475672	0.5830169	-0.17276812	-0.20443964	-0.22427225	-1.7074318	-0.118085384	-0.083316326	0.13677073
A_24_P810697	0.7894919	0.27883983	-0.3739779	0.9032614	3.9294522	0.029965162	0.059434175	-0.34864926	-0.023992777	0.023992777	-0.93668723	-0.5246966	3.3896239	-0.21649098	-0.16241145	-0.55586267
A_24_P359050	0.13159561	1.759923	0.16421127	2.1083407	-0.6397047	-0.13159657	-0.2079792	-0.2368002	-0.8756943	-0.260211	-0.67463017	-0.16666698	0.9459553	1.2381144	0.9671316	0.34306192
A_23_P73297	0.18670559	-1.3073273	0.7545023	0.32779312	-2.016828	-0.7485609	-0.8537226	0.6701803	-0.7895956	-0.11345768	0.5542059	0.1353817	-2.242115	0.07508373	0.14907837	-0.07508373
A_23_P83351	0.4884045	0.35185695	-0.045456648	0.5538671	-0.068668604	0.045456648	-0.2175858	-0.24047685	-0.5422871	-1.3519022	-1.6374042	-1.3314512	1.5564101	1.6033375	0.92558074	0.7713587
A_24_P107941	-0.09612894	-0.55114985	0.6655984	-0.113361835	-1.4375501	-0.14907122	-0.12527323	0.038318157	-0.30947065	0.4036212	0.18743944	0.510756	0.076788425	0.26946688	-0.038318157	0.08161116
A_24_P611114	-0.17937231	-0.43607998	1.2965713	0.11170292	1.0705762	0.2715273	3.3187866E-4	1.2775769	-0.19407606	-0.52373123	0.14798784	-1.4075613	-0.29910135	-0.48114204	1.8253479	-3.3187866E-4
A_24_P861869	-0.23038769	1.3092599	1.194087	-0.4158497	-0.3975563	0.17845249	0.7789631	0.02422762	-1.2234707	-0.5867691	-0.8880501	-0.50615215	1.9829578	0.68116856	1.2162666	-0.024228096
A_23_P206454	-0.063818455	-0.18275785	0.2678666	-0.088860035	-0.58968306	0.03188753	-0.03188753	-0.1752305	-0.10895014	0.21663427	0.065077305	0.34009027	-0.31877565	0.20986032	0.32920694	0.18541193
A_23_P91262	-0.061435938	0.01922679	-0.3395574	-0.08962941	3.0971172	0.3487661	0.71365714	0.082134485	-0.033409834	-0.029403448	0.16400647	-0.2691381	1.9811704	0.15426946	-0.24100709	-0.01922679
RC2	0.2290039	0.011605263	0.28241348	0.16187859	-0.6629915	-0.05949211	-0.30621147	-0.23778152	-0.69264793	-0.070194244	-0.54231167	-0.011605263	0.9408121	0.79102135	0.6432266	0.2855234
A_23_P330419	-0.2669196	0.7563119	0.07292938	0.22838497	0.044220924	-0.16527319	-0.6517906	-0.044220448	-1.1491714	-1.0836868	-1.1185098	-1.0572004	1.5952444	1.4940128	0.8541589	0.62547874
A_23_P163227	0.20890617	0.10662937	-0.023693085	-0.006483078	-8.73864	-0.19257927	-0.19066906	0.006483078	0.1237669	-0.036423683	0.20477772	0.24893856	-9.116856	0.118925095	-0.3027935	0.16097546
A_23_P152038	0.043100834	0.31973886	-0.29863596	-0.28335524	0.42478514	0.02373743	0.39502764	0.20381594	0.13786745	-0.02373743	-0.33634424	0.13419008	-0.2920804	-0.7491765	-0.5597577	-0.3913889
A_23_P110253	-0.7147856	-0.09479523	0.39083862	-0.7486925	0.13186741	0.02780819	0.38825703	0.33843708	-0.13825321	0.26627064	-0.3390398	0.5112972	-0.3800869	-0.10327244	0.29116344	-0.02780819
A_24_P92771	-0.710155	0.43276167	-0.97452974	-0.55214643	2.7659345	-0.2997346	0.10186052	0.40654516	-0.03802061	-0.16086149	0.014520168	0.34864473	1.6195731	0.41233492	-0.35549593	-0.014520168
A_23_P65717	-0.42264557	-0.75460434	-0.37142467	2.3793044	2.9261765	-0.18531561	0.9208679	0.05635929	0.4270935	-0.7479	-0.32485485	-0.67232704	2.5097227	0.8376117	1.8076763	-0.05635929
A_23_P501319	-0.02661705	-0.35600567	0.026618004	4.640741	-0.8244209	0.13759327	-0.44299126	-0.4741068	0.4678707	-0.34995937	-0.81578255	-0.27435493	1.1225681	0.5925579	0.50462055	0.13956404
A_24_P317637	-0.08745098	0.3749218	0.19256401	0.11511135	-1.2366514	0.36575413	0.24015808	-0.37294006	0.4566908	0.18009281	-0.69727516	-0.6356888	-0.93518066	-0.3573866	0.0012359619	-0.0012359619
A_24_P255005	-0.1847043	0.5362253	0.32016468	0.149158	1.6227098	-0.12866783	-0.52794456	-0.41375685	-0.7765498	-0.57850647	0.0014820099	-1.2106729	1.5873227	0.31464672	0.17085505	-0.0014820099
A_23_P163380	0.1561017	0.084652424	-0.11508608	0.029447079	-1.2937856	-0.178823	-0.046672344	0.0037779808	-0.059209347	0.1869893	0.2187438	0.37571573	-0.628386	0.09532404	-0.22248316	-0.0037779808
A_32_P209250	0.41176224	-0.0071487427	0.9027958	0.34696913	-1.4463391	-0.28507137	0.0071487427	0.72728634	-0.07945442	-0.1381464	1.5338211	-0.16741371	-0.34420395	0.010606766	-0.21041918	0.26512766
A_24_P117845	-0.05805874	0.34611797	0.061689377	0.5062313	-2.9760427	-0.16440201	-0.47331715	0.042933464	-0.6735072	-0.44752932	0.30959845	0.25492525	0.7619133	1.7304564	-0.042933464	-0.150321
A_32_P193822	0.74690914	-0.50763655	-0.94301796	-0.018136978	1.1365376	-1.4600325	-1.3758955	0.14019775	-1.0194716	-1.5328808	0.3399024	0.513083	0.018136978	0.022687912	0.832602	-0.58185625
A_23_P318039	0.33869696	-0.10680246	-0.042919636	0.042919636	-0.79173803	-0.7192826	0.055027485	0.4560609	-0.54806757	-0.082931995	0.27236605	0.0471797	-0.09266853	0.21447754	-0.70756483	0.35327864
A_23_P218375	0.43780756	-0.45890665	0.3630252	0.18849039	-0.9636426	-1.2481427	-0.9815917	-0.22385168	-1.2930732	-0.113294125	0.2840953	0.41483164	0.5681491	0.49711847	-1.2527995	0.113294125
A_23_P253464	-0.22994947	-0.28989267	0.72420835	-0.015985012	-1.2835822	0.1994729	-0.17819262	-0.34070253	0.015985012	0.23285723	-0.97823095	0.087751865	-0.44475508	0.18792963	0.4617448	0.3851304
A_24_P192556	0.058376312	1.062038	0.43527555	0.87237597	-0.058376312	-0.47392893	-0.9301133	-0.63334465	-1.6310315	-2.1356215	-1.6483188	-1.9344487	1.333086	1.2887759	0.88716125	0.44090366
A_24_P922793	0.26339054	-0.037994385	0.34017372	0.1422596	-0.59067154	-0.026159286	-0.21756935	-0.25966358	-0.677125	-0.05525589	-0.5150204	0.026159286	1.0218916	0.8187833	0.7239599	0.3541565
A_24_P88565	0.5459075	0.16617823	-0.20387983	0.4287982	0.31767035	-0.50004435	-0.15925169	0.019703388	-0.20421076	-0.020998478	0.074735165	-0.095216274	0.106535435	-0.019703388	0.12430143	-0.26754427
A_23_P210001	-0.017531633	0.93171906	-0.8974154	1.3609517	2.1434615	2.101866	-0.56750274	-0.031374693	0.42386746	0.017531633	-1.0838463	-0.32361007	2.9469826	0.5520904	-0.41551518	-0.1857388
A_23_P328836	0.14098406	-0.0031151772	-0.13055563	0.8142915	0.0031151772	-0.41041803	-0.43226767	0.35710478	0.15550375	-0.27042723	-0.523293	0.32142925	-0.84989166	0.13427687	-0.043661118	0.6231704
A_24_P184844	-0.0363307	0.5340743	0.8183303	0.8383975	-0.17645311	0.0363307	-0.6902728	-0.04877329	-1.9882617	-1.6374936	-2.0900464	-1.5535321	2.7884536	1.7088156	1.4577417	0.51172876
A_23_P24457	-0.4471035	0.022770405	-1.7650418	0.31803894	-3.9214468	0.12036133	-1.2602844	-0.022770405	1.1344204	0.33832836	-1.6784806	0.91660404	-2.4955359	0.8648076	-1.1792135	0.3828087
A_23_P78958	-0.7801697	-0.6270859	0.8977134	-1.3010323	2.3634932	0.71089816	0.0026972294	1.1627657	1.1081593	-0.1387341	-0.25849938	-0.45370412	2.2542307	-0.6909988	-0.0026972294	0.1618092
A_32_P99461	0.16829967	0.034849167	0.28269863	0.61369514	1.6823788	-0.68598557	-0.93001556	-0.4627409	-0.3706894	-0.17088413	-0.46365547	-0.034849167	1.1602945	0.19931126	1.0838737	-0.04830742
A_23_P122782	-0.01951027	-0.17452717	0.44567108	0.1804161	-2.2252312	0.044991493	-0.16468811	-0.37403774	-0.28440857	0.01951027	-0.3503313	0.09838295	-0.99706364	0.070651054	0.3450327	0.24809551
A_23_P319013	-0.06916165	-0.13109708	-0.23000598	-0.6555383	0.54499793	0.34041572	0.5068915	-0.18644118	0.31604266	0.0063402653	0.43421626	0.109455824	0.50282073	-0.1216948	-0.0063402653	-0.065163374
A_24_P923336	0.059908867	0.1094203	1.4438925	-0.37985134	-0.46179295	-0.059908867	0.095986366	-0.97977066	-0.8173075	-0.34059906	-0.44143105	-1.2799473	1.7322621	3.2758183	1.545557	0.6049285
A_23_P84736	9.3889236E-4	0.3647542	0.19587564	0.048307896	-6.493153	0.19395685	-0.29354858	-0.4587226	0.5690217	-0.06657696	-0.9949465	0.36754465	-4.884579	0.16637707	-0.0073928833	-9.3889236E-4
A_23_P90497	0.10264826	0.4698038	0.46640873	0.5368357	-0.6042137	-0.102648735	-0.89908504	-0.8558731	-1.493547	-1.8662295	-1.8769255	-2.0421305	0.99951696	0.9862366	0.49237013	0.58483934
A_23_P6303	-0.015800476	-0.45300198	0.23031807	-0.0441761	-2.0124798	-0.32400608	-0.19260979	0.015800476	-0.6581631	0.016702652	0.018107414	0.08371353	-1.3358564	0.37845993	0.08368492	0.019464493
A_23_P398491	-0.09388542	-1.0707302	-0.37052107	-0.20572424	0.69254017	-0.19090223	-0.032025337	0.19784164	-0.7716384	-0.64312744	0.03202486	0.092107296	0.05576563	0.3210616	0.4771099	0.05916977
A_24_P691775	-0.041445732	1.4025307	0.3330803	0.4333315	0.18266106	0.041445732	-0.6117945	-0.060542107	0.05406475	-0.83243895	-0.5757427	-0.9268079	0.14821243	-0.06444788	0.0773139	-0.093150616
A_23_P154522	-0.32620287	0.22915411	-0.2549777	-0.33148336	-2.3831782	0.24793291	0.2760291	0.17271185	0.24303198	-0.18594122	-0.051720142	0.19315863	-2.520433	-0.06317186	0.11309767	0.051720142
A_32_P93419	-0.053385735	-0.31890583	0.05338621	-0.16951275	-1.0341415	0.6075244	0.42613697	-0.67375183	0.52344894	-0.40412807	-0.11426735	0.5587349	0.57229614	1.2562866	0.27865887	-0.09954071
A_23_P211619	0.63726616	-0.49061775	-0.8628259	0.2650652	-2.3907619	-0.02402687	0.20901537	0.02402687	0.7917795	0.24429846	-0.77661467	-0.16539145	-0.25978994	0.7481532	-1.9137878	0.04248905
A_24_P233915	-0.06755543	0.11429405	0.06992626	-0.036022186	0.16491413	0.015052795	-3.0287008	-0.015052795	-0.06823921	0.1278038	-0.3107748	-0.39727783	1.4323807	0.1846199	-0.09399414	0.36975002
A_24_P24645	0.35349607	0.6335397	-0.18540335	0.5471883	-2.4140058	0.10683775	-0.18474531	-0.28401518	-0.15043688	-0.051237583	0.16535234	-0.40938997	-1.7866416	0.051237583	0.45767927	0.18185472
A_23_P126248	0.14182091	-0.11847019	0.25390434	0.025841713	-0.37927914	-0.02584076	-0.4815607	-0.4957571	0.7385764	-0.2181406	-0.13369846	-0.13144302	1.3984289	1.2257242	0.44624233	0.067233086
A_23_P351903	0.2542882	0.040851116	-0.040851116	-0.1109643	-0.73893785	-0.95571566	-0.22189093	0.22272348	-0.9010291	0.20156908	1.0091739	0.85882807	-0.4465232	0.48781347	-0.94232893	0.3525548
A_32_P167511	0.60305786	-0.48024654	0.062387466	-0.2559862	-0.5836849	-0.06238699	-0.085814	0.14912653	-0.10817671	0.3406906	0.07173872	-0.30556154	0.28719282	0.16013908	-0.22397089	0.07050085
A_32_P73217	-0.1511836	-0.53041315	0.06491709	-0.4643302	0.16183996	0.1990962	0.1955409	-0.4489293	0.053752422	-0.040224552	-0.9139056	-0.50199556	1.0996661	-0.10489416	0.040224552	0.35923433
A_24_P929449	-0.14510822	-0.3041234	0.17744875	-0.49709034	-0.36295748	0.5523138	0.14510822	0.49169588	-0.53724957	-0.7798486	-0.444623	-0.617455	1.0686378	1.1622801	0.6749749	0.42947578
A_23_P93046	0.6703286	-0.087744236	1.243648	0.5195508	1.7866321	0.07941675	-0.17101526	-0.5909114	0.079866886	-0.58618593	-0.4646001	-1.0003114	0.86878633	-0.73510456	0.09229565	-0.07941675
A_32_P221579	1.8563623	-0.0070905685	0.36943817	0.13371658	-0.79632854	-0.16035175	-0.075938225	-0.41075802	0.0070905685	-0.12129021	-0.52920437	-0.038858414	0.802989	0.6303239	0.51796436	0.14028645
A_24_P333541	1.7243257	0.01703453	0.39498758	0.15774536	-0.7770319	-0.13874817	-0.3893919	-0.390131	-0.4049902	-0.09838486	-0.5060272	-0.01703453	1.9546614	0.65075636	0.53685856	0.15982437
A_23_P84749	0.112398624	-0.31140566	0.46763086	-0.1038723	-1.7792182	-0.62925625	-0.6599264	0.16579247	0.31577444	-0.5040169	-0.6928401	-0.64220715	0.3571148	0.31902695	0.103872776	0.7537074
A_24_P932919	0.08157444	-0.17696095	0.20469189	-0.035595894	0.8569708	-0.33621883	-0.39077377	-0.59018993	0.03559494	-0.29346848	-0.70121	-0.21437931	1.6344085	1.6674132	0.3339591	0.6969285
A_24_P677471	0.28829336	-0.04632902	0.26776457	0.5053687	0.04632902	0.11288881	-0.12075567	-0.21164942	0.1691165	-0.65426016	0.06959486	-0.24572515	-0.13828897	-0.63667583	0.62254477	-0.0819993
A_23_P53623	0.52820873	-0.06863737	0.099653244	0.55481815	2.5029736	-0.47763777	-0.16805935	-0.31960773	0.10681248	-0.091263294	-0.35026407	-0.8692827	2.108098	0.068636894	-0.50975084	0.16396952
A_23_P375147	-0.18754864	-0.39194775	-0.20651436	0.37702942	-0.63204765	0.6875763	0.22150326	-0.06918621	0.06918621	0.34731007	-0.22039318	0.26657104	-0.27403736	0.0821085	0.9169464	-0.4381361
A_23_P333228	0.19749355	-0.6527767	-0.16393995	-0.22215366	2.6873312	0.36961317	-0.108781815	-0.2388711	0.1007576	0.49917316	0.08252525	-0.29734898	3.2984867	0.010938168	-0.010938168	-0.42290354
A_23_P256641	-0.36365223	0.046420097	-0.0718832	-0.003127098	-3.711824	-0.24679565	0.04186535	-0.33970642	0.15621853	0.003127098	0.0837965	0.09879303	-2.5886855	0.24457073	-0.11810017	0.39442348
A_23_P32125	0.4970703	0.405715	-0.14055729	0.3942566	0.15270138	-0.25242805	0.044804573	-0.044804573	-0.3899088	-0.0731802	0.60138893	0.18923664	-0.6164646	0.116223335	-3.5657883	-0.11019325
A_24_P153568	0.20518017	-0.066594124	0.33952236	0.08395386	-0.865263	-0.21971893	-0.4899721	-0.49274158	4.6285458	-0.16940594	-0.5882244	-0.10067463	0.71203613	0.5636406	0.43107224	0.066594124
A_23_P88971	0.533144	0.1457634	-0.11912346	0.54913425	1.4547052	-0.3727312	-0.26869202	-0.06866264	-0.12180996	-0.11257839	0.36789608	-0.34297562	1.1968622	0.37063217	-0.49868107	0.06866264
A_24_P372833	0.29374886	-0.21411228	0.5894108	2.8459835	-1.1977835	-0.020847797	0.34835434	-0.83645725	-0.37661934	-0.5717459	-0.99753475	-0.5066223	0.58337975	0.15945196	0.02084732	0.21682167
A_23_P352469	-0.7147758	0.007900953	0.596565	-0.007900953	-1.7230642	0.12127185	0.35235476	-0.5301697	-0.3893292	-1.8526084	-0.5848758	-1.0463989	0.46053672	0.74819016	0.064935446	0.039866686
A_23_P50807	0.18495035	0.53563166	0.6066966	0.20756006	-1.5599113	-0.5476451	-0.62447405	-0.762177	-0.16719389	0.0060973167	-0.0060973167	0.09002447	-0.48664045	0.41326666	-0.3179183	0.24500322
A_23_P58046	-0.2027669	-0.5916829	2.4051976	3.8991985	-0.9736581	0.28094912	-0.531342	0.2027669	-0.5553489	-0.6106744	-0.51209307	-0.509253	0.59978724	1.6851807	1.1232581	0.51283026
A_24_P489399	-0.024280548	0.5702448	0.06029129	-0.15006256	-1.8260489	0.44616508	0.37616348	-0.19465351	0.024280548	-0.16510963	-0.3967657	-0.03756714	-1.1695566	0.26398277	0.9931135	0.66810894
A_23_P203103	-0.08347416	0.34688282	0.25597286	0.046894073	1.0638571	-0.03799486	0.07537842	-0.2335658	-0.0666523	0.021785736	-0.021785736	-0.31376648	0.7136493	-0.05505085	0.7268095	-0.1869626
A_32_P181222	0.86364603	0.36979437	-0.35518456	0.6797819	3.6000557	-0.1274457	-0.99837685	-0.8170428	-0.2168827	-1.2396178	0.14054585	0.1274457	2.5735264	-0.14012623	1.3727484	-0.52188253
A_24_P278156	-0.06192112	0.29136086	-0.031798363	0.10174179	-0.52515984	0.031798363	-0.38688278	-0.26338863	-0.41249752	-0.11860371	0.17543316	0.21084023	-0.2576337	0.32842827	0.38464546	0.5911932
A_23_P35484	-0.12246323	-0.48779488	-0.089505196	0.12594557	-0.087488174	-0.37145233	-0.4783535	1.3838291	0.7273798	-0.49022675	2.9541874	-0.40572453	1.1365376	0.830039	0.447567	0.08748722
A_23_P381489	0.17738438	-0.18446636	0.21118069	-0.0151968	0.015195847	-0.06919098	-0.18318462	-0.04376793	1.0995655	-0.18471813	-0.6236553	-0.102228165	1.006361	0.82529926	0.74646187	0.38599062
A_23_P55448	0.26034355	-0.09823036	0.29509544	0.07461643	-0.5122385	0.01571083	-0.104745865	-0.125494	-0.7337246	-0.09653854	-0.53964806	-0.015709877	1.0908113	0.907876	0.8281808	0.4671688
A_32_P38989	-0.010232449	0.8631582	0.21565676	0.87363386	-0.0941205	-0.25622606	-0.16990852	-0.057159424	-0.5995817	-0.6760311	0.010232925	-0.6137085	0.16807795	0.28547573	0.5784707	0.36408186
A_24_P414803	0.20769024	0.92740107	0.24489212	0.03446293	-0.56737995	-0.03446293	-0.16666222	-0.18768215	-0.78135777	-0.13983536	-0.5901413	-0.061585426	1.0396237	0.8532324	1.2201443	0.40983534
A_24_P944437	-0.33820105	-0.68709135	-0.29947424	-0.50552225	6.8616443	0.3055477	1.559308	0.13888979	0.30981588	-0.20793772	-1.1347871	-0.60398245	6.58919	0.30581808	0.22354221	-0.13888979
A_24_P315862	-0.15595555	0.29913926	0.25375533	0.1758554	0.07525754	-0.13055778	-0.5629628	-0.07525754	-0.42164683	-0.45300937	-0.28375173	-0.7571471	1.1416194	0.9606178	0.62748075	0.2105968
A_24_P938372	-0.032668114	1.0483384	0.009225845	-0.1901617	0.62515354	-0.2742777	-0.421381	0.14065552	-0.009225845	-0.36839104	-0.82716465	-0.29260445	4.0229793	1.8325152	2.3812585	0.7248111
A_32_P83776	1.2302318	-0.2578144	2.0423603	1.526505	-0.36919785	-0.8534279	-0.7170396	-0.39710855	-0.23113489	0.07874346	0.23284769	1.1735454	-0.890656	-0.07874298	0.7851062	0.2645898
A_24_P918808	-0.05316496	-0.003914356	0.53653	0.24415636	0.003914356	-0.23189974	-0.15923452	-0.04072714	-0.63284063	-0.013328075	-0.11496019	0.25951242	0.7070012	0.4265313	0.060060978	0.28011942
A_24_P65507	-0.02846241	0.47816467	0.32260323	-0.030376434	-2.4476604	0.025585175	-0.2283535	-0.19517136	0.14947891	0.1959343	-0.17346287	-0.025585175	-1.2410517	0.42802238	0.04826355	0.28085804
A_23_P121234	-0.0036811829	0.3860426	-0.13843822	0.1436224	-8.600531	0.016939163	0.13790989	-0.21256733	0.0859499	-0.12919807	0.061840057	0.32182407	-8.135151	-0.21194077	-0.24891567	0.0036811829
A_24_P16036	0.023172855	-0.23203993	0.59317636	-0.023172855	-0.71822596	-0.85955286	-0.5682254	-0.14285612	-0.50294256	0.20562696	0.24634981	0.6465659	0.16184187	0.48849535	-0.60621786	0.24664736
A_24_P135427	0.0049111843	-0.37664962	0.16294551	1.5644577	-1.7203763	0.22436118	-0.17799783	-0.28261447	0.3211038	-0.12494683	0.095128775	0.052671194	-1.2992008	-0.08917165	-0.0049111843	0.16173005
A_23_P336513	0.6087818	-0.0066747665	0.45127487	0.5885315	-1.294589	0.0063266754	0.195817	-0.2692871	0.03322792	-0.0063266754	0.15841293	-0.26916504	-2.1846938	-0.54840565	0.16065598	-0.36081123
A_32_P86456	-0.9264207	0.0016670227	-0.055419922	0.071211815	0.61941385	0.60947275	-0.19541502	-0.63742733	-0.9078007	-0.035406113	0.035627842	0.08737421	2.2533655	0.7895651	-0.085923195	-0.0016670227
A_24_P762767	-0.6597018	-0.35705185	-0.5997529	0.44726992	1.9034576	0.109185696	-0.8980756	0.9383254	-0.21849298	-0.75056696	5.4898877	-0.90045214	1.710968	0.87666035	1.0290446	-0.109185696
A_23_P103631	0.004588127	-0.6532936	0.28285503	-0.08083153	-1.1251125	-0.0813427	0.22936726	0.116662025	-0.3620329	0.30091763	0.5052967	0.44518948	-0.040714264	0.13960075	-0.05426979	-0.004588127
A_23_P57733	0.13811207	1.1294446	0.73113155	0.4239607	-0.22800541	-0.50059414	-1.0151973	-0.653213	-0.86506176	-0.9756193	-0.043640137	-1.3454261	1.6231298	0.889822	0.5091605	0.043640137
A_23_P359245	-0.21057034	-0.7630577	0.28882122	-0.6215029	1.5115871	0.18197536	0.24387169	-0.07117653	-0.28989887	0.3552351	0.07117653	-0.16233349	1.4303503	-0.53031063	0.38384247	-0.7323923
A_24_P555473	-0.15063	-0.20916557	-0.15582085	-0.8471627	0.58982134	0.4426837	0.93228865	1.0426216	1.3196292	0.29212093	-0.5446868	0.37580395	-0.99388075	-0.3184781	0.15063	-0.80780697
A_24_P136522	-0.18159246	-1.7762527	1.0774827	-0.96124077	-3.598567	0.04633379	-0.046334267	0.21873617	-0.847065	0.4780841	-0.08938217	0.36038733	-0.83431053	0.46935797	0.4327402	0.50128365
A_23_P7087	-0.21469736	0.008347988	0.3011489	-0.42311335	0.3496089	-0.100848675	-0.0268054	-0.40459967	-0.008347988	0.018938541	-0.12427473	0.1478076	0.99098253	0.48826742	-0.22946787	0.28812838
A_23_P57036	0.148134	-0.021389723	-0.037204027	0.075589895	-1.0003569	-0.389436	-0.31428933	0.11949515	-0.14579415	0.18828702	0.021389723	0.12427831	-0.021394014	0.4183557	-0.23000216	0.1377294
A_23_P35597	1.704555	-0.033004284	-1.8635616	0.25503397	2.801014	0.03300476	0.5737896	-0.087080956	0.07053375	-0.33473253	-0.11663294	-0.9549122	2.51687	0.44423532	-0.056412697	-0.058512688
A_23_P377267	-0.18804455	0.18804455	0.24291039	-0.5454321	-4.9289203	0.89778805	0.7107372	0.32458687	1.0626678	-0.31267643	-0.36504078	-0.7446909	-5.3889675	-0.91147614	0.27592754	0.31236267
A_23_P71908	-0.18802118	0.69792604	-0.031352997	0.053291798	0.8917136	0.18180895	-0.25290155	-0.78871584	0.37115622	-0.3507533	-0.77959776	-0.056665897	0.88385344	-0.105306625	0.33125734	0.031352997
A_24_P706873	0.17742729	-0.11485672	0.26030064	0.060480118	5.167669	-0.12778568	-0.32670593	-0.36796284	-0.75608253	-0.14308834	-0.59817696	-0.06048107	0.9113283	0.70876837	0.61185646	0.24001312
A_23_P138435	-0.72951937	-0.44507456	0.3423295	-0.3869586	0.14389849	0.15716982	-0.049598217	0.18546534	0.33659697	0.049598217	-0.70115423	-0.2689042	0.8353219	-0.2212205	-0.30726767	0.3621726
A_32_P26103	0.6226165	-0.19799781	-0.3017242	0.66441417	0.67986274	-0.27009892	0.08268237	0.012042761	0.15284038	-0.12246394	-0.44388413	-1.1649268	0.697099	-0.12811112	0.35075593	-0.012042761
A_32_P158253	-0.32527685	0.23447323	0.10246897	-0.06025076	0.17423916	0.06025076	-0.3936634	-0.5655408	-1.5501852	-1.081594	-1.4561863	-1.3857155	1.7186675	1.0212421	0.45049763	0.14040804
A_24_P598406	0.017838955	0.15697336	0.29541636	-0.07689524	-1.1356196	0.12595987	-0.017838955	-0.3423972	0.24010229	0.3511834	-0.0687232	-0.038688183	-0.26108408	0.026163578	-0.21244192	0.019887447
A_24_P144163	0.0123848915	-0.033952236	-0.17414713	0.18968725	-0.8658633	0.012344837	0.19017363	0.14020395	-0.15460348	-0.003841877	-0.53256655	-0.09632349	-0.22075987	0.21276426	0.003841877	0.22547674
A_32_P528967	-2.590054	-1.3495126	0.98429203	-0.10629654	-4.0756125	0.6179066	0.73497677	-0.22476673	0.10629654	0.48216057	0.5319767	0.28791714	-3.0951161	-0.39764404	0.5190096	-0.18432903
A_23_P340822	0.1810875	-0.095682144	1.1507969	0.06622124	-0.7488737	0.18612194	-0.3708706	-0.40589905	-0.14837742	-0.15227222	-0.39441967	-0.06622028	0.86017704	4.807973	0.64582634	0.39523125
A_24_P372012	0.15191555	0.77041435	0.09947109	-0.024345398	-4.737696	0.13525772	0.22982979	-0.23716164	0.024345398	-0.2730198	-0.077557564	0.11519241	-5.198949	-0.8607588	1.3989668	-0.4548216
A_23_P214882	0.06176567	0.78437805	-0.17458296	0.013250351	0.21218967	0.41962814	0.305686	-0.34596062	0.4494114	-0.5846343	-0.90188456	-0.9775839	-0.013250351	-0.8114996	0.696846	-0.17755222
A_24_P525877	0.009437561	-0.26161003	0.10964489	-0.10524082	0.23111439	-0.34569645	-0.56339645	0.39349174	1.1917353	-0.33078575	-0.13338375	-0.24407768	0.6641183	0.46886635	0.36725712	-0.009436607
A_23_P201160	0.26245594	-0.0066919327	0.36420965	0.14795113	-0.6988964	-0.09744263	-0.3172493	-0.34539604	-0.65140915	-0.08009815	-0.510026	0.0066928864	0.90883255	0.7147155	0.61285925	0.23570919
A_24_P933400	-0.6180723	0.0180552	-0.74969363	-0.6534145	1.2271593	0.056734324	-0.36158633	-0.08621955	0.2671249	-0.0180552	-0.6883218	-0.37020564	1.6292493	0.054294825	0.48301625	0.061375856
A_23_P366936	-0.16096306	-0.42680645	0.67446136	-0.27553082	-0.6797228	-0.22400188	0.16096306	-0.77843094	0.3116622	-0.50836945	0.6894145	0.26815987	1.1707988	1.7749615	0.17481232	-0.2033186
A_24_P51184	1.4597831	-0.52588654	-0.15568352	-0.37614632	-0.27485943	-0.63551617	0.9043398	0.22956657	0.15568352	-0.6113348	-1.0345554	-0.5247469	2.0180216	1.3789644	0.33069992	0.84452534
A_24_P127748	-0.38007307	0.05301857	0.2506256	-0.27615452	-1.1714349	0.19279528	0.51008797	0.18385553	0.45463896	-0.053018093	0.061318874	-0.6304083	-1.3094916	-0.26457357	-0.19720364	0.06937647
A_24_P935082	-0.3577485	0.57681084	0.5806351	0.047255993	-0.6191244	1.1396236	3.5262017	-0.77483654	-0.5351763	-1.3864651	-0.5299244	-1.3003826	-0.04725647	0.6855364	1.1352005	0.41462803
A_23_P121657	-0.020596504	1.2587619	0.17302704	0.34336472	-5.3005934	-0.16160393	-0.4830985	-0.46386337	-0.4621153	0.020596504	0.3237791	0.5729046	-3.6951666	0.42556572	0.44479752	-0.25713062
A_23_P24294	0.6291733	0.17695045	0.7984462	0.89633226	-4.0981474	0.17276669	-0.015823841	-0.51748466	-0.5761876	-0.35219526	0.5840707	1.2749858	-1.3650217	0.0060687065	-0.0060691833	-0.3371358
A_23_P397978	1.9198551	-0.1284957	0.23044682	0.6833315	1.3709936	0.39921665	-1.6827173	-0.060509205	-0.43934917	-1.4871368	0.060508728	-1.4024525	2.0860248	1.5714478	-0.36063194	-1.2102871
A_24_P280274	1.6647868	0.010539055	0.38202715	0.15368176	-0.75811195	-0.12983131	-0.37044716	-0.37881088	-0.63201046	-0.09469986	-0.5075884	-0.010538101	0.84541893	0.6651397	0.55665016	0.17798328
A_23_P202334	-0.2345357	0.25525904	-0.008971691	0.008971691	-7.595026	0.5325961	0.25732088	0.022257328	0.94185495	-0.14041758	-0.74808073	0.14752054	-5.736024	-0.17296267	-0.4496293	0.5497718
A_23_P383601	0.22661734	-0.15481997	0.9692359	-0.22286987	0.50466394	0.30946112	-0.054811	0.8954129	-0.041314602	0.041314602	-0.05535364	-0.4940672	0.61260223	-0.22285652	0.49079752	-0.06464672
A_24_P938572	0.11101627	-0.14578915	6.3067617	-0.004012108	-0.9329996	-0.29679394	0.44055176	-0.5474005	0.21125221	-0.2572527	-0.6673975	-0.17556858	0.6680012	0.49373102	0.38181686	0.004012108
A_24_P388190	0.5971284	0.48013783	0.41662407	0.5996599	0.12554407	-0.3871436	-1.2435274	-0.44096422	-1.3407841	-2.1159616	-2.2600598	-2.7207317	1.5395341	1.4979768	0.5671582	-0.12554455
A_24_P318073	0.22827482	0.19544744	-0.11393213	-0.059295177	-0.43562937	0.15098715	0.21641779	0.21829367	-0.02008009	0.033741474	-0.023645878	0.02008009	-0.75683355	-0.12641001	0.21948957	-0.2644
A_23_P103720	0.13126802	-0.07137251	0.4075017	0.07137251	-3.4128242	-0.5767684	-0.38724947	-0.22332335	-0.3789363	0.19762659	0.4141507	0.1801219	-1.2978168	0.19065142	-0.83852625	0.26681185
A_24_P926783	0.09393883	0.16562653	0.16716766	-0.657341	-0.859869	0.28144646	0.2201109	-0.5661888	0.14407921	-0.17396355	0.06654167	-0.28070545	-0.8621397	-0.5111675	-0.06654167	0.2682991
A_23_P74526	0.06796789	0.33919	-0.30284548	0.2115798	-0.04604864	-0.10642576	-0.34564924	-0.42276716	-0.19461775	0.18374395	-0.26499224	0.04604864	0.260283	0.18339872	0.66299486	-0.31794405
A_23_P200707	0.4892969	-0.20047379	-0.8581605	3.0619426	0.97653055	1.373342	1.5838594	0.3063836	0.8919072	-0.27365637	-0.06832504	-1.0195656	-0.18214607	-1.0493255	-0.33535528	0.06832504
A_23_P93613	0.19316816	0.7876239	-0.5758014	0.078608036	0.018046856	0.106190205	-0.018046856	-0.5653548	0.34949923	-0.51372576	0.020021915	-0.19136095	-0.47102785	-0.44112062	-0.3970189	0.11296511
A_24_P238131	0.08382559	0.8220277	-0.08382559	-0.086054325	0.657866	0.49675608	0.7799058	-0.15293694	0.3889184	-0.17948103	-0.16085386	-0.19505405	0.24168682	-0.537344	0.10976982	-0.4132223
A_32_P211708	-0.26112843	-0.7006235	-0.30146408	0.38584614	-9.3771515	0.26973438	-0.22082806	0.22082806	0.2552023	0.44298935	-0.47439003	0.8856325	-7.7935762	0.46600056	-0.80685997	0.3445263
A_23_P86943	0.0919919	0.7144227	-0.025560856	0.025560856	2.3456302	0.22805643	0.14816332	-0.2038579	-3.0046325	-0.1095376	-0.44934797	-0.24896479	1.695499	-0.032928944	-0.049096584	0.09769201
A_23_P16683	0.59600735	0.77293396	0.42737675	0.31628227	-0.749588	-0.2324419	-0.20504665	-0.07766533	0.028884888	-0.023804665	0.51837254	0.023804665	-1.177988	0.19530296	-0.16945076	-0.06442547
A_23_P203173	0.7505131	1.0283203	-0.07518911	2.1482573	-1.9309077	0.010166645	0.03913927	-0.4166293	0.16187143	-1.7653184	-0.4547553	-1.7003617	-0.3131919	0.8412247	-0.010166645	0.31393957
A_23_P29924	0.18489265	-0.3102932	0.25213146	0.07081509	-0.5139599	-0.37970924	-0.4526615	-0.26045036	-0.29638577	0.008259773	0.15498734	0.41978455	-0.008259773	0.3596449	-0.15617847	0.25232506
(+)eQC-40	-0.20155239	0.3645115	-0.061523438	0.4518094	-0.667943	-0.0381155	-0.62220955	-0.61783123	0.8879175	-0.12154198	-0.29531288	0.038116455	0.83631706	0.9382849	0.42094755	0.68762636
A_24_P310756	0.110396385	0.30976486	0.25000668	-0.085591316	-0.06691456	0.5492096	0.14806175	-0.46142006	1.0756702	-0.15660763	-0.6329737	-0.19799137	-0.097937584	-0.17630672	0.06691456	0.48726273
A_24_P57170	0.2976029	0.3101051	0.6361382	1.3683894	0.39653182	-0.653167	-1.578768	0.10444331	-0.36672854	-1.1858237	0.28846812	-1.1551025	4.0125847E-4	-0.07825923	-4.0125847E-4	-0.29197383
A_24_P409857	-0.18551683	-0.36337805	-0.037401676	-0.39878035	-1.3338895	0.51668215	0.8373561	0.34957266	-0.08050966	0.2910037	0.33156633	0.45490408	-1.2220778	0.037401676	0.4353385	-0.072059155
A_24_P450194	0.18832421	-0.19024825	-0.12435174	-0.30183244	0.31823564	0.32348275	0.29068255	0.9935596	0.5456035	0.06408477	0.6024549	-0.3313806	-0.528486	-0.494879	-0.07199502	-0.06408477
A_23_P139825	-0.1707716	0.08786297	-0.93942547	0.54401875	2.2124443	0.029499054	-0.55585575	-0.72746897	-0.070581436	0.4723196	-1.0296826	0.44633055	2.6694765	0.5400343	-1.0849724	-0.029499054
A_32_P20014	0.18887663	0.7954173	0.47071695	0.8077669	-0.2859974	-0.7575989	-0.65233994	-0.18887663	-2.358889	-2.7494736	-2.1677265	-2.366376	1.6813712	1.4119186	1.1817808	1.0842443
A_32_P542928	0.049426794	-0.3776729	0.8079078	-0.009340525	-1.3755114	0.009340525	-0.14221406	0.39036727	-0.14633012	0.47354293	0.1003263	0.49122024	-0.15363574	0.45132852	-0.033741236	-0.029464006
A_32_P226907	-0.15449214	-0.20103335	-0.30554366	-0.044362783	-0.17682672	0.20462537	-0.2950852	0.044362783	-0.24588227	0.20717168	0.29886794	0.23714328	0.79020905	0.81252027	-0.4435656	0.34777808
A_23_P7397	-1.0702207	-0.033667326	-0.19278121	-0.9497988	-0.42132878	0.91102004	1.123677	0.47720695	1.3292491	0.4074142	-0.33878446	0.31143737	-1.1591313	-0.9766109	0.033667326	0.22264934
A_23_P40952	0.3194666	0.4417181	-0.14331055	0.34488678	0.36179256	-0.05117607	0.15014267	-0.11957359	0.12414932	-0.11366749	-0.12535954	-0.08239174	0.055936813	-0.10089779	0.05117607	-0.20775032
A_24_P165259	0.64642715	0.036039352	0.77607536	0.1836853	-1.0244827	-0.20583725	-0.33804512	-0.44744968	-0.39317513	-0.037739754	0.044887543	0.22987556	-0.29030704	0.11153412	0.23942375	-0.036039352
A_23_P319232	-0.2283988	-1.8389354	-0.0043025017	0.7209525	-0.0957284	-0.08495617	0.43105507	-0.82195234	0.8434324	0.9266114	0.0043025017	1.2027011	-0.65712786	1.3710132	1.0183926	-0.27221012
A_23_P150407	0.20484161	0.38412285	-0.12175751	0.034737587	3.8849506	-0.40504074	-0.46292496	0.28128815	-0.60187435	-1.0079746	-0.3397169	-0.5356846	3.016467	0.579875	0.112285614	-0.034737587
A_23_P404059	0.2502222	-0.09307003	0.2902193	0.09317398	-0.5286598	0.009972572	-0.13639545	-0.15814304	-0.73210144	-0.08545494	-0.5441942	-0.009972572	1.0818119	0.8914404	0.80681753	0.44386292
A_32_P216635	-0.60801077	0.62535524	-0.7050619	-0.2302928	-4.8123336	0.32741785	0.60305643	0.63348293	0.9115138	0.6182046	-0.5920453	0.8865881	-3.2007852	-0.2310152	0.015898228	-0.015898228
A_23_P159893	0.515573	0.20958185	0.23383713	0.22957182	-0.7931838	0.34833622	0.2628789	-0.0499444	-0.004948616	0.004948139	-0.08095789	-0.25233364	-0.64339066	-0.031903744	0.41882086	-0.04020548
A_23_P208582	0.7199106	0.40659523	0.9496155	0.87515354	0.15937233	-0.31661892	-0.05077362	0.05077362	-0.34874344	-0.18758392	0.27796936	-0.22729874	-0.3352213	-0.06644726	0.8862324	-0.26189804
A_23_P126313	-0.51317215	-0.76333714	0.062986374	-0.65417385	2.7614732	1.2522926	0.27912283	0.21383762	-0.027502537	-0.83684444	-0.88157654	-0.7628145	0.5658474	0.11527681	0.02750206	-0.33704948
A_24_P186030	-0.3193679	0.022986889	0.20270872	-0.467525	0.16150331	0.245296	0.45294046	0.43275404	0.16073847	-0.022986889	0.37575102	-0.2567973	-0.39238167	-0.89603424	-0.50848913	-0.16009474
A_23_P407684	0.8721452	0.33062696	-0.13503599	0.76256895	0.33461905	-0.21820402	-0.034746647	0.2521472	-0.23057032	0.0041127205	0.44609022	-0.27077913	-0.0041127205	0.2128005	-0.21555471	-0.33069658
A_23_P212500	0.66308403	-0.2647848	-0.26377487	3.3337831	-0.8445754	-0.35187626	-0.90097857	-0.2561164	-0.06952095	0.6044946	0.46216965	0.31428766	-0.31237125	0.5119934	0.5541625	0.06952095
A_24_P23522	-0.4281609	0.108106375	0.20626807	-0.30814767	-1.1836002	0.5396831	0.18393874	0.12545896	0.3121407	-0.081593275	-0.09746528	0.081593275	-1.590184	-0.3263638	0.23842025	-0.11393762
A_23_P148798	0.16315603	-0.10874796	-0.048655033	0.0069031715	-1.4629455	0.104815006	-0.0069031715	-0.15213919	-0.21914816	-0.09428835	0.30565786	0.29601717	-0.83230925	0.11573839	0.13230276	0.22772169
A_23_P211047	-0.3906827	0.21713686	-0.21620703	-0.15235567	0.34202814	0.7272935	0.45172548	-0.05862856	0.7354779	0.1535058	-0.20652723	-0.14972544	0.0062031746	-0.4705701	0.2899356	-0.0062031746
A_24_P506680	0.27078414	1.8496358	1.6288583	0.94145465	-0.48132873	0.85370517	-0.5463717	-1.1263659	0.12806392	0.36273932	1.1600149	-1.5207884	-0.12806392	-2.0591195	-0.49551702	-0.42938352
A_23_P42112	0.18230534	1.0716825	0.53297853	0.7488208	-0.18230534	-0.24743319	-1.0609899	-0.28990936	-1.001296	-1.2866707	-0.75904703	-0.90718937	1.428957	1.9427629	0.8971882	1.0023146
A_23_P164638	0.47322536	0.35416007	0.16184926	-0.24172139	0.52672744	0.4166124	-0.012880564	-0.5054848	0.35727572	-0.27750516	-0.39113736	-0.6790631	0.11417079	-0.62317014	0.012880564	-0.34003043
A_24_P60268	-0.043388367	0.81896734	-0.025451183	-0.39068413	-5.156129	0.66801405	0.73061705	-0.095317364	0.37484932	-0.05851412	0.198277	-0.5230503	-3.542613	0.025451183	0.252254	0.04237795
A_24_P354748	-0.0970602	0.7007303	0.20819283	0.017537117	1.0321164	-0.4805889	-0.8782344	-0.017537117	-0.73728895	-2.2113004	-1.2566919	-1.9625297	1.6115489	0.62195873	0.6017108	0.3577609
A_32_P127566	-0.616745	-0.918807	-0.3944149	-0.73454	-1.4638147	2.443891	0.4616604	1.182086	-1.5597086	2.1167383	1.8154478	1.8707204	0.14914417	1.327837	-0.14914417	-0.5186291
A_23_P214821	-1.5659771	-0.6681838	0.09117651	-0.777163	3.4855819	-0.016948223	-0.36724424	0.3572564	-0.7427087	-0.29089308	0.7678199	0.016948223	3.1650767	-0.54111004	1.4549003	1.5515113
A_24_P216087	0.55912495	0.1640234	-0.4349041	0.57200146	0.5450077	-0.8333483	-0.537838	-0.41641712	-0.41749477	-0.04044342	0.04044342	0.14858055	0.21109104	0.08043003	-0.2470522	-0.19433498
A_23_P159622	-0.09422135	0.7031424	0.3732593	0.16342759	-0.24448085	0.09169793	-0.25874686	-0.09169793	-0.22128034	-0.48177743	-0.6536181	-0.8203819	1.5244701	0.92770267	0.41678166	0.3229916
A_24_P251950	0.11077261	0.17162657	-0.7015815	-0.014149189	-3.008408	0.41968012	0.10574007	0.047738552	0.17458677	0.014149189	0.64903307	-0.027998447	-3.5117188	-0.08092642	-0.7232709	-0.16592741
A_23_P39718	-0.3532896	-0.45299816	-0.07594299	-0.32215405	0.64377403	0.18979263	0.2256794	0.08386707	-0.15493774	-0.21943378	0.07594299	0.07807827	1.4695034	-0.31994057	-0.109472275	0.08112335
A_23_P57910	-0.6486435	-0.32761097	0.65646696	-0.53877974	-2.7205234	0.57529163	0.36310863	-0.01548624	0.01548624	-0.29899693	0.5227833	0.07931423	-0.24267578	-0.36430502	0.079820156	0.5101595
A_23_P87664	0.46492243	1.1138778	-0.046249866	0.4867568	-0.47838926	0.23324919	0.3109622	-0.25910616	0.5305524	-0.047270298	-0.42227793	-0.46916246	-0.5891671	-0.06800699	0.38633204	0.046249866
A_23_P385084	0.33311272	0.889905	-0.03945017	-0.7940836	-0.21866274	0.03945017	0.5181713	1.4559851	-0.19166279	-1.2840438	0.95042515	-1.4084969	-0.8173313	0.16966343	1.1502705	-0.10744333
A_23_P24004	-0.39146566	-0.21384954	0.16371775	-0.30368376	7.1668363	0.34685802	-0.3687539	-0.25134754	-0.9701214	0.027925491	-0.77021646	0.109684944	7.0890784	1.548202	0.7680888	-0.027925491
A_24_P111009	1.3930054	-0.92605114	0.862134	1.2975159	-0.56429386	0.2980795	0.6594496	0.19913101	-0.19913101	-0.21020031	0.8023424	-0.24156284	-1.4673805	-0.8219466	1.3778114	-0.3460188
A_24_P920555	-0.18342614	0.24205136	0.5033772	0.26643205	-0.4480946	0.5383203	-0.1735704	-0.2228105	-1.1805222	-0.5459287	-0.3793223	-0.65783143	1.5832288	0.58448577	0.33727574	0.1735704
A_23_P214578	0.18020439	-0.09496784	0.2753768	0.06711674	-0.75355816	0.7264228	-0.067852974	-0.40906048	-0.7395477	-0.15218925	-0.59203243	-0.06711674	1.8811545	1.3272629	0.5569978	0.18128109
A_24_P286598	-0.13571644	0.6147804	-0.22494316	-0.2789998	1.2720327	1.0592098	1.0245037	0.13571644	0.5731497	-0.5914211	-0.72784996	-0.62728167	0.20032358	-0.69816303	0.15718555	-0.16909409
A_23_P416011	-0.007082939	-0.1898222	1.2043219	0.7378421	-0.5938349	0.16565323	-0.6594696	-0.21453905	0.19676447	-0.65368557	-1.5288763	-1.0082693	1.4136419	2.066142	0.007082939	0.64365196
A_23_P105562	-1.2808342	-0.47740507	-0.39494944	0.7608657	-1.9224916	0.39494944	-0.45185995	1.2112327	2.0849442	1.2991052	-1.5495491	1.8872991	-1.7885976	1.1836267	-1.9558268	1.4486613
A_24_P324074	0.34129143	1.4071732	-0.34129143	0.96667385	0.49222946	-0.6967945	-0.6035385	-0.60645294	-0.6951513	-0.59398174	-0.4580698	-0.45302486	0.57436657	0.87623405	0.56613445	0.45063305
A_24_P843552	0.053484917	-0.053484917	0.06297016	-0.09661484	-0.86995983	0.20155716	0.1436758	0.43767548	-0.5857582	-0.7647848	-0.13545895	-0.10911083	-0.59481144	0.5158272	0.68890095	0.66189957
A_32_P221256	0.31982183	0.28482008	0.4771638	0.05404806	-0.6435342	-0.014386654	0.38368845	0.22907114	0.13321638	-0.1188941	0.014386654	-0.31753778	-1.1172166	-0.8180156	-0.24900103	-0.5456214
A_24_P208909	0.06469631	0.83926487	-0.6210413	0.27789593	-0.30026722	0.45502472	-0.020943642	-0.25491238	0.5043249	0.020943642	-0.5191412	-0.13448048	-0.35312557	0.1524458	0.73737526	-0.09175682
A_23_P401718	-0.06796169	-0.32456493	0.31805038	-0.29329205	-1.0335693	0.12962246	0.1191473	0.45381927	0.12955856	0.29796505	-0.24901772	0.27988243	-0.48688984	0.06796169	-0.6289635	-0.22671509
A_32_P127339	0.045149326	0.25677204	-0.029688835	0.45304537	-0.0566144	0.029688358	-1.5936756	-0.73568535	-0.41835356	-1.5133033	-0.70213795	-1.5185165	0.9781575	1.2070293	0.531075	0.10025644
A_24_P75808	0.18616486	-0.07319069	0.295269	0.07319164	-0.8235073	-0.20139217	-0.43691444	0.2728672	-0.7181606	-0.16927814	-0.5877075	-0.084965706	0.7822108	2.144196	0.49103546	0.11214733
A_23_P211056	0.021862745	0.9215286	0.42343116	-0.77840877	-0.55924726	0.33612418	0.21169925	0.2302711	0.4113891	-0.14345288	0.16004825	-0.15281463	-1.5746081	-0.7735245	-0.021862745	-0.07115102
A_32_P171143	-0.8286357	-0.78240633	0.32347107	-0.5097027	-0.8875766	-0.6678624	-0.88451576	0.18456602	0.055719376	0.016230583	-1.1175013	0.15975142	0.14430809	0.18971777	-0.016230583	0.29107618
A_23_P66311	0.37082052	0.6456938	0.08655691	0.3196349	-0.33434725	0.21381855	0.03929472	-0.42050838	0.46837425	-0.18345642	-0.2616253	-0.31165648	-0.6575451	-0.039295197	0.14888096	-0.207232
A_32_P69136	-0.28433514	-0.35536146	1.9050317	-0.15330648	0.7474184	-0.30084705	-0.6289935	0.11540699	0.0476346	-0.16259336	-0.0476346	-0.20500994	1.8481832	0.34680605	0.21268272	0.37745762
A_23_P350155	0.27162457	0.015148163	0.38773823	0.15791035	-0.77490425	-0.1364975	-0.38640022	-0.388134	-0.62410164	-0.09509277	-0.50696564	-0.015147209	0.82624817	0.65241003	0.5398669	0.16236019
A_24_P619891	0.08729744	-0.16940498	0.2045269	-0.026778221	0.15957022	-0.323555	-0.5759144	-0.57603836	0.61931515	-0.28082752	-0.69231606	0.026753426	2.2332668	0.46404362	1.5151224	-0.02675438
A_32_P120726	-0.29269028	-0.2173357	0.44011688	-0.22328377	0.34261036	-0.08469772	-0.06737995	0.06737995	-0.38150978	0.35681915	0.3158121	0.18465519	0.926692	0.41599655	-0.28507233	-0.20063305
A_24_P911536	0.2757454	0.017897606	0.39575195	0.16107273	-0.7842865	-0.13964653	-0.3967762	-0.3947792	-0.5664482	-0.09449196	-0.50615597	-0.01789856	0.81287575	0.6455612	0.52863264	0.1533699
A_24_P666035	-0.44431448	-2.6305952	0.24529839	-0.6007824	-3.4352894	-0.0023789406	-0.34579515	0.08564186	0.0032625198	0.115353584	0.0023794174	1.3896942	-1.8398633	0.43245935	-0.6762619	0.22175646
A_24_P125434	0.51260996	-0.010122299	0.6511049	0.2661271	-0.23055935	-0.25929928	-0.36379528	-0.24025297	0.44862318	-0.51547813	-0.18300056	0.010121822	0.99796104	0.7065611	-0.39700937	0.29182577
A_23_P141044	0.06112337	-0.24693632	0.37843752	-0.36629057	1.691546	-0.06112337	-0.108193874	0.16463041	0.26638174	0.18605947	0.5279975	-0.2108283	1.5048966	-0.28076887	-0.8282962	-0.2564807
(+)E1A_r60_a20	-0.20976663	-0.06551385	-0.082188845	0.26246047	0.87647986	-0.70859694	-0.38056016	-0.072422266	0.7019508	0.7959602	1.7152641	2.0236967	0.5109842	0.06551385	-0.08299947	-0.5041964
A_24_P161959	-2.1886826E-4	-0.12591028	-0.18345547	2.1886826E-4	2.161118	-1.3250461	-0.832212	0.029584408	-0.59623384	0.061152935	0.31430006	0.33129454	2.0953116	0.15817165	-1.2397428	-0.048196316
A_23_P12755	0.0013337135	0.251781	0.20509529	0.6752434	6.6113806	-0.0013332367	-0.25739002	-0.3132186	-0.83675575	-1.1565733	-0.57617617	-0.498847	6.1348534	1.6988091	-0.07266617	0.6098161
A_23_P430930	-0.79163074	-0.9188962	0.31606245	0.26907158	-1.5853658	-0.036872864	-0.5302286	-0.98063993	0.7613025	1.0083189	-1.3566656	2.1666508	-2.3718443	1.5566459	0.16472626	0.03687334
A_24_P931472	0.28894234	0.014586449	0.42176533	0.16905499	-0.7807274	-0.13294029	-0.4065609	-0.41190243	-0.49574375	-0.07917595	-0.5052929	-0.014587402	0.79574823	0.64793015	0.5127425	0.15079689
A_23_P29866	0.48441124	1.0045528	0.36356306	-0.33280182	-2.0796328	-0.39895916	-0.011292934	0.83226156	0.3586297	-0.24486303	0.7218113	-1.0011544	-2.4458213	0.011292458	-1.352448	0.5923424
A_24_P942017	-0.6657276	0.24448729	0.8633003	-0.7881222	1.1330366	0.93897533	3.7082496	0.14929962	1.4183726	-1.0299921	-0.14929962	-0.969038	-0.16216373	-0.30455303	0.45217228	-0.8025255
A_23_P128609	0.0018754005	0.6474457	0.6813874	0.5258732	-0.5147109	0.8603406	-0.96645784	-0.0018754005	0.21734285	-0.6317353	-0.8205581	-0.57255507	0.2328434	0.4266038	-0.051938534	-0.40524912
A_23_P434919	0.86465263	0.0953455	0.6776314	0.96933174	-0.1757698	-1.6656666	-0.79863834	-0.24883747	-0.9921055	-0.0953455	0.1723032	0.4109087	-0.83090353	0.36234283	0.53582096	-0.15712261
A_23_P59470	-0.065299034	-1.9785357	-0.44934273	3.6052256	0.69710255	-0.4858613	-0.3939066	0.2259469	0.025957108	0.17939138	-1.0020032	-0.009636879	2.2441201	-0.100414276	0.009636879	0.49639463
A_24_P153713	0.55829716	-0.3147335	1.730979	-0.055822372	-2.8051796	-0.29636288	0.20207596	2.0279236	-0.33910465	-0.46598434	1.2445755	-0.3169117	-1.4685154	0.055822372	0.5171032	0.3884201
AT_P_3	0.06163788	-0.025774002	0.19973183	-0.024410248	-0.2514	-0.10331631	-0.093605995	0.063676834	-0.7541542	0.024410248	-0.67010975	-0.17434883	1.1999359	1.0422535	0.9558239	0.7519169
A_24_P332711	-0.39840364	0.032303333	0.28603458	0.5255561	0.26152468	-0.4795332	-2.827993	-0.97655725	-1.3321352	-0.029447079	-1.3901267	-1.1850986	1.0209794	0.7917762	0.51047707	0.029447079
A_23_P48807	-0.17265892	-0.07902622	-0.32067204	-0.3716259	0.6085987	-0.020618439	0.017300606	0.154665	-0.11285114	-0.0017776489	-0.014555931	0.2719078	1.0590591	0.14101887	0.1376791	0.0017776489
A_24_P387609	0.053147316	0.70126057	-0.030474663	-0.057157516	-0.4101715	0.9732332	0.5562582	-0.23421669	0.2884941	0.002541542	-0.38016415	-0.13081074	-0.3873911	-0.002541542	0.90603256	0.15057945
A_23_P95802	-0.56291056	0.17579412	-0.5851064	-0.34759665	-8.931313	0.28200388	-0.004785061	0.03266096	0.48918104	1.107677	-0.68940973	1.0897603	-7.337017	0.5572648	-0.16165304	0.004785061
A_23_P150467	-0.7236471	-1.2450418	-1.0360966	0.68587303	0.43353653	1.1190243	0.16654539	1.0800576	-0.0020713806	-0.5460806	1.5598831	-1.3476877	0.77864075	-0.01717329	0.0020718575	-0.05722332
A_24_P942151	-0.5992744	-0.48672748	0.120990515	-0.48433518	-1.2260334	0.45398974	-0.032353163	0.032353163	-0.92865634	0.5549743	0.7006309	0.8428929	-0.3237617	0.38568187	-0.80704856	0.0989058
A_32_P386636	-0.09994078	0.0023627281	0.018251419	0.77402544	-0.24955082	0.07421827	-1.1969461	0.28628922	-1.719924	-1.4612064	-1.5819168	-1.9876719	1.027134	1.1891084	1.439898	-0.0023622513
A_23_P108265	0.19388509	1.6117866	0.62337565	0.87767434	-0.5061624	-0.2921393	-0.5228727	-0.19388509	-2.0946739	-2.9211104	-2.4573338	-2.2185209	1.7314446	2.708801	2.0287745	1.7934673
A_23_P255486	-0.40701008	0.6796074	-0.15682602	0.1321783	-1.2534714	-0.71944714	-0.6791153	0.65943146	0.21346569	0.94254494	-0.6169977	-0.74650383	0.9398298	0.16681623	1.734148	-0.1321783
A_24_P15965	0.23921871	0.80877113	0.34989548	-0.73217297	-0.63412	0.9550581	1.657156	0.4761505	1.1593094	-0.0019321442	-0.107458115	-0.409935	-2.121788	-1.2323141	-0.04620552	0.0019321442
A_24_P916073	-0.512485	0.006430626	-0.006430149	-0.3520713	-1.1735377	0.6254568	0.9653683	0.25611305	0.69789314	0.04097891	-0.31042528	-2.7666168	-1.048172	0.1920886	1.7751498	-0.030944347
A_24_P418637	0.15951514	-1.0239189	-0.33806252	0.7665689	0.20292592	-1.2501452	-0.68945813	1.1256421	-1.0236652	-0.1445992	0.54459786	1.2285149	-0.8789079	0.1445992	1.6558735	-0.43752885
A_24_P200583	-0.30880356	-0.71694756	0.008312225	-0.39330196	0.46092224	-0.58989525	-0.12302208	0.29706573	-0.64350414	-0.008312225	0.16932106	0.5260763	1.0399914	0.20296764	-0.3631134	0.050774574
A_32_P133767	-0.15057945	-0.7411499	0.6915755	-0.79050636	-1.3402596	-0.4268117	0.04323244	0.24041462	-0.25860834	-0.043231964	0.42642164	0.5983157	-1.5779414	0.08841801	0.40424442	0.56443167
A_24_P921103	0.22321248	-0.372679	0.1911614	0.3649943	2.465514	-0.14587522	-0.16313434	1.678746	0.14587522	-1.2460473	0.8185632	-0.8427284	1.1861894	-2.4710996	-0.5937917	-0.7723391
A_32_P208599	-0.19749975	0.47676706	0.008433342	0.2776785	-0.20613432	-0.008433819	-0.42432642	-0.38694954	0.05463028	-0.5645976	-0.45201445	-0.7233591	1.063097	0.8055372	0.58911943	0.5726447
A_32_P60223	-0.1354127	-0.6284604	0.43093824	-0.2878213	-2.5670657	0.06927347	0.10045481	0.22470808	-0.0012984276	0.22318602	0.23728228	0.37294722	-2.5185275	-0.0668273	-0.3706565	0.0012984276
A_23_P137715	-0.096687794	1.1531806	-0.3037181	0.37684107	0.447186	0.09902525	-0.12629461	-0.301085	0.5463624	-0.14771032	-0.8629241	-0.38516665	0.07774687	0.10625315	0.14157343	-0.07774687
A_24_P349264	-0.2117095	-0.533607	0.32342052	-0.34035063	0.32533407	-0.46275187	-0.63721514	0.5406747	-0.46772623	-0.5270686	1.0443568	0.055289745	2.3555574	0.40148163	1.1212945	-0.055289745
A_24_P912925	-0.51115847	-0.05364418	0.31386042	-0.8770213	-4.6068335	0.062980175	0.3940735	0.18356562	0.40171242	-0.32883835	0.37417746	-0.7518544	-3.2297392	-0.28226757	0.05364418	0.6563735
A_32_P61313	0.6622629	-1.0000038	-0.12822151	-0.8074465	-1.4940901	-0.061881542	-1.1196547	0.32038212	0.061881065	-0.300642	3.9275508	-0.9217806	2.0874643	0.46485806	1.146368	0.16196966
A_24_P142269	0.5244572	0.39997602	-0.49602485	0.36902165	-1.4157941	0.5106461	0.35328698	-0.13375878	0.5534575	0.02646947	-0.6266444	-1.0188777	-1.5877359	-0.36339164	0.36345267	-0.02646947
A_24_P467073	-1.2463894	-1.5583172	-0.009693146	-1.3672838	-2.0672827	0.3377838	-1.2084646	0.10543871	0.009693623	0.1272707	0.07971048	-0.012201786	-0.45320415	0.5809326	0.97260284	1.1098886
A_23_P210869	-0.45079756	0.97564745	0.28820133	0.37736368	-0.84362364	0.33824062	-0.2882018	-0.35986805	-0.90906954	-1.5206246	-1.8827744	-0.89620733	0.81772375	1.5327802	1.0869584	0.93386316
A_23_P218918	-0.23718596	-0.5377536	0.10767794	-0.1415391	0.18155909	0.20204401	0.27317667	0.024103642	-0.13540411	-0.37859964	0.33980227	-0.024103642	0.5845399	-0.4559493	0.3418479	-0.046198368
A_32_P29408	-0.6089239	-0.004494667	0.41709137	-0.40626335	-5.219936	0.33901882	0.53094625	0.6404872	0.66756487	0.004494667	0.32839823	-0.14471674	-4.1965494	-0.58811283	-0.24821329	0.40002298
A_23_P136777	0.05809784	-0.24420929	0.12884998	-0.058098793	7.3879175	-0.22199821	-0.41404724	-0.45318604	0.41433668	-0.2538185	-0.72000694	-0.17629528	6.550657	0.62463856	0.88609886	0.15956974
A_23_P380928	-0.38392448	0.36379147	0.0645628	0.025574684	3.3666077	-0.2629366	-0.66438913	-0.025574684	-0.576457	-1.1740184	-1.1294017	-0.74608564	2.5049486	0.89816093	0.070239544	0.30077648
A_24_P62783	-0.4881916	0.4599409	-0.65587425	-0.355649	1.0732555	0.51349163	0.559247	-0.015405655	0.25824642	0.0024576187	-0.07365227	-0.48860073	0.8634596	-0.0024576187	0.32658768	-0.1820383
A_24_P32708	0.11297083	0.7525468	-0.09361696	0.17499399	-0.67698526	0.06642294	-0.018165112	-0.31154203	-0.32564592	-0.5985265	-0.69005346	-0.21614122	0.018165112	0.60750055	0.9750247	0.48548555
A_23_P102816	-0.7053256	-0.28175592	0.5036025	0.0040545464	-1.0110078	-0.0040545464	-0.29306173	-0.91909075	-1.1170945	0.35370588	-0.39825583	0.03690195	0.93988657	1.1217561	0.3091445	0.09645319
A_23_P13899	0.09981108	0.62697077	-0.43670797	0.38311338	0.6348319	-0.31538343	-0.24532366	-0.27489138	-0.33469057	-0.19107103	0.013330936	-0.013330936	0.42248487	0.3896451	0.038634777	-0.15529108
A_24_P34066	-0.105140686	-0.65520954	0.6502185	-0.012176514	-1.3035641	0.5974369	0.34180784	0.91465807	0.0121769905	-0.40941906	-0.2674327	-0.339509	-0.92913866	0.12183952	0.950582	0.1542387
A_32_P41574	0.17734289	0.41198778	0.09395075	-0.056623936	-3.5696254	-0.7854924	-0.7390466	-0.45416784	-0.79317904	0.056623936	0.23411894	0.45708418	-2.334292	0.5769391	-0.43007421	0.077655315
A_32_P131294	0.03455925	0.10255289	1.1636753	0.86416674	-0.034559727	-0.73616123	-0.78098583	2.4076095	0.055814743	0.22646952	-0.36951923	-0.7525072	-1.3019357	-1.503202	1.0791874	-0.16255951
A_23_P90752	-0.099052906	0.30576372	-0.7563739	0.08804178	1.4825244	0.0018115044	-0.0018115044	0.1722045	0.17998934	-0.013409138	-0.2346015	0.19443464	0.9063716	-0.17017984	-0.6444497	-0.18029356
A_24_P942354	-0.30253792	-0.84127426	0.1993761	-0.3735695	-0.60160255	0.11340618	0.23048306	0.42603397	-0.005927086	0.5074234	-0.105713844	0.4180479	-0.1385088	0.050824165	-0.32470322	0.005927086
A_24_P201879	-0.09510279	0.1762929	-0.16698408	0.16825724	-0.63341475	0.25705194	-0.21057844	-0.2475686	0.10139799	-0.26295042	-0.36492205	0.09510279	-0.5486474	0.16384077	0.3358569	0.25736856
A_23_P130418	0.17063713	-0.3743229	0.03155899	0.03272152	-1.2205276	-0.08273983	0.07041073	0.3145771	-0.19691467	0.19851398	0.3739767	0.5013485	-0.6322298	-0.044207573	-0.21415329	-0.03155899
A_23_P391164	-0.256361	0.33724308	-0.20407867	-0.3205204	0.46575356	0.6673279	0.6368246	0.03678894	0.7809143	0.14868736	-0.0039367676	-0.33083916	-0.54203606	-0.43873215	0.0039367676	-0.05025196
A_23_P28153	0.26922035	0.5612068	0.53722286	0.0043354034	-3.9157224	-0.0043354034	-0.2095375	-0.68418026	0.096263885	0.5179262	0.4346695	-0.21648121	-3.069222	-0.020147324	0.16152477	-0.012144089
A_23_P30547	0.5068493	0.18549824	0.59410334	0.2292819	-3.7349386	-0.41091967	-0.07652283	-0.1251173	-0.52672815	0.07652235	0.38315868	0.5942278	-1.4401178	0.36014414	-0.29224777	-0.16751051
A_32_P151594	0.08376789	-0.034623146	0.22750092	-0.21650887	-1.9409075	0.023515701	-0.08911228	-0.040981293	-0.106126785	0.120287895	-0.023515701	0.54310036	-1.2445097	0.20776653	0.21109962	0.06270409
A_24_P486659	-0.050061226	0.6581855	1.4872193	0.41597557	-0.98285866	0.81365013	-0.63643265	-0.37517643	0.05006075	-0.3906479	-0.821681	-0.30608368	1.14044	1.9142771	0.29336357	-0.08433628
A_23_P211899	-0.24640656	0.23549652	0.3273573	-0.13872147	-8.184477	0.14842415	-0.40854645	-0.7025461	0.07770157	0.17669106	-0.8785982	-0.00819397	-5.630717	0.00819397	0.7191124	0.16300201
A_23_P147383	0.6898565	-0.17119884	-0.63329935	0.6366291	1.5944204	-0.26482964	0.100836754	0.09442997	0.18568516	-0.31333542	-0.012095451	-1.0978603	0.82010555	-0.22858667	-0.6462951	0.012095451
A_23_P110492	-0.11615467	-0.7690792	-0.83816814	0.1707182	0.11615467	0.3724079	0.44800186	0.58544827	0.5659857	0.13323593	-0.5588503	-0.2190609	-0.13323689	-0.32011604	0.55765724	-0.17497158
A_23_P214766	-0.253407	-0.52693605	0.2583127	0.3665862	1.4802718	-0.05136156	-0.55503416	-0.28611612	-0.15049314	0.032908916	-0.23840952	0.30891943	1.5879588	-0.032908916	0.32224607	0.1140914
A_32_P103131	-0.7207341	-1.1572318	-0.4853139	-0.082321644	0.8415599	-0.6801896	-1.0231795	0.36521482	0.16052961	0.13984728	-1.0547853	0.29710054	1.6144032	0.09810114	-1.8087192	0.082321644
A_23_P119634	-0.06909227	0.10479498	0.31064177	0.54518557	-0.103966236	-0.2330141	-0.72714615	0.17744398	-0.65479183	-0.32078648	-1.0431705	0.2558794	1.1984334	0.83857536	0.06909227	-0.4280033
A_24_P118946	0.0041356087	-0.5534835	0.06078005	0.083328724	-2.9593081	-0.10593462	0.092903614	-0.027869701	-0.7651963	-0.24609709	0.24123526	0.33626318	-2.6156583	0.053411007	0.90064955	-0.0041356087
A_23_P107116	-0.7064915	-1.2084742	0.3957348	-0.83481216	-2.7608032	0.42221165	0.14535713	0.41833782	0.34339333	0.1694088	0.12002468	-0.30754185	-1.3746929	-0.26225948	-0.12002468	0.17974186
A_32_P200490	0.40912032	0.20550656	0.011043787	0.55290484	-0.53568673	-0.94656444	-0.7224176	-0.2221148	-0.5671303	-0.011043787	0.11064744	0.25685477	-0.06464887	0.7404759	-0.26113725	0.12962699
A_23_P53198	0.33149529	-0.28206635	-0.5859599	-0.011650085	-3.520924	0.90322924	1.1222415	0.6833024	0.7748456	-0.019411087	0.22836637	-1.2164178	-2.9208064	0.011650085	-1.3757453	0.34561253
A_24_P929558	-1.0664611	-1.4425011	1.4345646	-1.0269008	-1.516758	0.109639645	-0.42480373	0.49069214	0.25507355	1.4140863	-0.3216219	0.94755363	-0.10963917	1.0664277	-0.16089058	0.6922841
ETG05_66023	0.8031559	0.43227482	0.09760761	1.2442899	-0.36450052	-1.323235	-2.2228298	-0.8864579	-1.0852637	-1.063921	0.46295834	-0.09760761	0.66401625	1.4787664	-1.0867538	0.47645998
A_32_P47874	-0.2967801	0.056674957	0.20900059	0.2381177	2.8172731	-0.056674957	-1.0754352	-0.10594702	-0.9314828	-0.6035371	-0.4055953	-0.39863348	4.5694704	0.8755851	0.3022828	0.51866484
A_32_P186741	-0.667011	-0.94771934	0.051037073	-1.0092571	-0.06342769	0.0746758	0.13896966	0.2585423	-0.19343066	0.1868136	0.05921769	0.47959828	-0.051037073	-0.20711112	0.30554652	-1.0098569
A_23_P93602	0.26380348	-0.008139133	0.45988464	0.02418518	0.5409999	-0.16640806	-0.8994756	-0.915092	-0.35345268	-0.94406414	-0.8566685	0.00813961	1.7429743	1.0046463	-0.65127087	0.016454697
A_24_P273510	0.5994992	1.198358	0.8009653	1.4436955	-0.53311634	-0.8142719	-0.9411731	-0.36963272	-2.0924368	-1.6159143	-1.660017	-1.5424166	1.6642089	1.9229531	0.36963272	0.7035551
A_32_P209841	-2.4382076	-2.035582	0.5444207	-1.1677055	-0.018277168	1.1324124	0.018277645	-0.63905525	-0.7516475	0.4490471	-0.353415	0.17273283	2.284536	1.0748811	0.31620836	-0.9446049
A_23_P411903	0.188488	-0.073539734	0.31182194	0.07353878	-0.8811512	-0.09226704	-0.49669838	-0.49393654	1.1000938	-0.18068027	-0.28858948	-0.110004425	0.7102537	0.5502777	0.4267645	0.4260149
A_23_P203267	0.7435565	-0.23390627	0.6473479	-0.008725643	2.4609408	0.6163659	-0.3448367	-0.9121194	-1.1090808	-0.5948739	-1.013618	-0.52565336	2.338193	2.033403	0.008725643	1.3921084
A_23_P27472	0.8294077	0.565691	-0.57427216	0.90274143	0.54691124	0.03937435	-0.009441376	0.04975128	0.41349125	-0.053858757	-0.16278744	-0.8508272	0.009441376	-0.04665184	-0.31759453	-0.09529209
A_24_P204604	0.10299826	0.01787424	0.34830427	0.2382102	-0.65408945	-0.60312986	-0.43140078	-0.11182642	-0.46498728	0.06429434	-0.19288778	0.14505911	-0.044342518	0.39062834	0.09517813	-0.01787424
A_23_P60069	0.15113306	-0.116242886	-0.21105528	0.018004894	-0.99421453	-0.15232992	0.23177671	0.051403522	-0.031091213	0.3659644	0.65659857	0.59462404	-0.7891345	0.34486246	-0.088148594	-0.018004894
A_23_P41948	-0.30505514	0.33766603	-0.42477465	-0.5132413	-1.8664613	0.92228365	0.8709235	-0.045440197	0.74221945	0.097632885	-0.032678127	0.032678127	-2.211431	-0.47081423	0.6077781	0.175488
A_23_P75470	0.7317047	-0.87841797	-1.1398454	0.71738434	0.94494724	0.05628586	0.18160248	0.048387527	0.23533916	-0.39503002	-0.37371445	-1.4432402	0.41786575	-0.09974575	-1.2089381	-0.048387527
A_23_P216920	-0.11211634	-0.08669233	0.35684538	0.005772114	2.552917	-0.08697939	-0.3852563	-0.59703875	-0.32098722	0.30998564	-0.005772114	0.4360385	3.7605062	0.6929879	0.07686281	-0.011360645
A_32_P223777	-0.60804844	0.17482567	0.592576	-0.20944309	6.0391693	0.20622969	0.049771786	0.1427927	-0.07790041	-0.13502693	-0.86794853	-1.4864645	5.770197	-0.049772263	-0.9568114	0.43040466
A_32_P200773	0.6908214	-1.4898493	0.10112786	0.78206134	-0.070869684	-0.07042289	0.045918703	0.4426744	-0.63387847	-0.045918703	1.167546	0.6030319	-0.25591254	-0.19567609	0.86655164	-0.8922794
A_32_P205241	-1.186872	-0.63077784	0.032256126	1.404449	0.78972197	0.7254882	-0.032256126	-0.78486204	0.81783533	-1.0571198	-0.6637392	-0.9777074	0.7058325	-0.38145828	0.428648	0.34513855
A_32_P804837	0.2827263	-0.09831905	1.4653244	2.345502	-0.48404503	0.016391754	-0.049575806	-0.07810974	-0.7262745	-0.11504936	-0.52121925	-0.016392708	1.0911384	0.92434835	0.84784794	0.49161863
A_23_P99172	-2.0074844E-4	-0.25587225	0.19521475	-0.110743046	-3.0955577	0.14533949	-0.09088278	2.0074844E-4	0.100241184	0.2459197	-0.11421442	0.33566618	-2.6325278	0.046947956	0.1444087	-0.09147692
A_23_P64217	-0.2708397	-0.42496014	0.52168655	-0.2525282	0.03765297	0.79674816	0.24544048	1.5659246	0.46964264	-0.03765297	0.22987652	-0.37058067	-1.2945027	-0.8783884	0.29388523	-0.7414198
A_23_P206441	0.30632257	-0.108837605	0.9280858	-0.118257046	-4.200232	0.03118372	-0.41656065	0.13670683	-8.13961E-4	0.13903475	0.37641573	-0.10078573	-3.8102736	-0.06752825	0.13436174	8.13961E-4
A_24_P113636	0.37439203	0.029118061	0.32008266	0.21064997	-0.2676797	-0.21548319	-0.029118061	-0.16477728	0.07724285	0.15541124	-0.23802519	-0.28845072	0.123012066	-0.26837635	0.15947628	-0.24448586
A_23_P255837	0.012658119	-1.2026329	-0.81021404	0.19382668	-1.6082964	-0.3334179	-1.1957216	0.06980276	0.11365175	-0.089607716	2.2586784	0.6212826	-0.012658119	-0.19050121	0.9261112	0.2771325
A_24_P791913	0.09336281	-0.26527405	0.12438393	-0.09336376	0.1896286	-0.14992332	-0.26628685	-0.28330803	-0.902935	-0.2655468	3.604721	-0.18362236	0.9235716	0.7436476	0.8575535	0.30195618
A_24_P73730	-0.16732216	0.09026575	0.30743837	-0.2325697	-0.27523184	0.17350149	0.30151415	-0.24912119	0.36764812	0.3438053	-0.87288	0.3275652	-0.25819874	-0.4085617	-0.09026575	0.20289183
A_23_P48997	-0.39910316	0.058498383	0.052770138	-0.052770138	-1.6199217	-0.18021011	-0.20644188	0.12938118	0.34614754	-0.45184946	-0.20016289	0.26246262	-0.20824003	0.8879318	0.0701313	0.77268696
A_23_P256773	0.33727455	0.27424812	0.10888672	0.0116176605	-1.0815153	-0.1571436	-0.008816719	0.05873394	0.008816719	0.3042698	-0.099043846	-0.08135033	-0.29381657	0.16866302	-0.11539078	-0.08494091
A_24_P342312	-0.4842415	0.53144073	-1.9061136	-0.08904219	0.25131702	-0.03163719	0.03352022	-0.16038513	1.0260038	0.03163767	-1.5333271	0.69533205	-0.5665536	0.23649883	-0.53442335	0.18465567
A_24_P46484	2.6273568	0.047047853	1.5346267	2.9157097	-0.11980224	-0.17193913	-0.047047853	-0.5900428	-0.14720225	0.20365357	-0.051180124	0.36931396	-0.22873521	-0.06977248	0.7788899	0.054758787
A_24_P42527	-0.38347864	-0.29523802	-0.1970315	-0.082503796	0.27354288	0.24032545	0.4192376	0.057744503	-0.038882732	0.038882732	-0.09149408	0.25145197	-0.16309881	-0.30968142	1.1996808	0.07488012
A_24_P387869	-0.022326231	0.2748158	-0.2597878	0.22484422	0.2783568	0.20406556	-0.17825007	-0.23834968	0.35725045	-0.368613	-0.38982272	-0.110045195	0.022326231	-0.29189992	0.48077464	0.100862265
A_32_P90009	-0.011020184	0.011020184	0.47083187	-0.29824638	-5.7711124	0.13295269	0.2107377	0.3833847	-0.1659708	-0.045073032	0.113679886	0.49376202	-3.7236242	-0.06875324	0.25738144	-0.074952126
A_32_P12820	-0.0028591156	-0.39057636	-0.05020237	-0.20025063	-1.5168924	0.0793066	0.055048943	0.0028591156	-0.34532642	0.11913204	-0.09030628	0.29195595	-0.8390026	0.047325134	0.19758224	0.08812237
A_23_P148969	0.33540344	-0.6031313	0.6106539	0.13018417	-3.084177	-0.13018417	-0.38105392	-0.27196884	-0.47385597	0.13862038	-0.17909718	0.1787138	-1.5810633	0.14148045	0.31207752	0.29228592
A_23_P355385	0.4350338	-0.30410194	-1.2134247	-0.018686295	-0.4509983	1.1670561	0.9538231	0.44823647	0.5032501	0.018686295	0.09087181	-0.094347	-0.5241537	-0.24699783	0.7385206	-0.54100704
A_24_P32715	-0.03800106	0.7068386	0.15607071	0.6094551	2.5337105	-0.87282085	-0.65915966	-0.22004223	-0.75455	-0.20236874	-0.32750988	0.012495995	3.1205177	0.9362345	-0.012495995	0.67759037
A_24_P281443	0.3905983	0.6781187	-0.28560162	0.73364353	-2.363905	0.033216476	-0.07328415	-0.24333763	-0.29995537	-0.033216476	0.21308517	-0.23421478	-1.5126457	0.3457718	0.6532736	0.37548828
A_23_P133315	0.26824617	-0.30772066	0.81683016	0.24669218	-1.6271214	0.29435778	0.13501596	-0.25034952	0.05372286	-0.05372286	-0.4124322	-0.64770746	-1.3300376	-0.6070075	0.4758935	0.3205428
A_24_P404840	-0.02198124	0.7692785	0.02198124	0.511394	-0.30872583	-0.07936144	-0.49150944	-0.41748142	-0.5992923	-0.037962914	1.9494085	-0.65376854	1.4811583	1.4598856	1.4477057	1.0152917
A_24_P5653	0.179595	0.65361595	1.1139898	-0.5716591	-1.097168	0.48999834	0.8172245	-0.11589813	0.24641752	0.11589861	0.59404564	-0.64485216	-1.926714	-1.6341629	-1.1206055	-0.33503056
A_24_P358305	0.3756857	-0.15662193	0.19149971	0.1666708	1.2912979	-0.30577278	0.020079613	0.110072136	-0.6538906	0.0048980713	-0.0048980713	-0.08337879	0.7651167	-0.34079552	-0.32009792	-0.35981655
A_24_P178415	-1.2344856	-0.21775246	-1.2715235	-1.3534622	-0.2836113	0.22695255	0.4038067	0.30043983	-0.17482948	0.33493233	-0.26771832	0.21455765	0.17482948	0.2018671	0.6508913	-0.28814888
A_23_P142125	-0.18121886	-0.07594228	0.07594228	-0.31299472	-1.5951726	0.35500407	0.27074885	0.90442157	0.90462947	-0.48844695	-0.3284738	-0.25870442	-0.26625276	0.44078708	0.23074794	0.95272136
A_23_P119023	0.47172523	-0.54834723	0.84289384	0.17517066	0.3686111	0.025048494	-0.025048494	-0.37948346	-0.6953585	-1.0647929	-0.29426503	0.5496633	0.25807405	-0.5260136	1.3853052	-1.0655797
A_23_P21346	0.01655054	0.28792238	-0.0014023781	-0.35880804	-0.0111403465	-0.22662687	0.0014023781	0.20722437	0.009199619	-0.37418127	0.29731894	0.12994242	-0.5731845	-0.519588	0.01834917	-0.52576494
A_23_P118313	0.09209919	-0.1089592	-0.19204044	-0.13398838	-0.014966011	-0.1638174	-0.19162464	0.014966011	-0.38684368	0.020385742	0.0939827	0.5206785	0.7752886	0.13582039	-0.80970764	0.08252525
A_23_P51085	0.056879997	-0.9651861	0.028570175	0.041550636	-5.7877426	-0.33315754	-0.29806042	-0.028570175	-0.851326	0.15692043	0.44084072	0.5121956	-3.8555098	0.5136776	-0.33411598	0.2843542
A_23_P69784	-0.40600705	0.60988927	-0.34965587	-0.6541321	-2.4627807	0.7897742	0.83783937	-8.895397E-4	0.5566561	0.15193248	-0.2614057	8.895397E-4	-2.335302	-0.3605144	0.06694245	0.13449693
A_23_P211748	-0.05989933	-0.0019416809	-0.25672722	-0.07694626	-3.0581732	0.37446213	0.089556694	0.0019416809	0.10269642	0.4080248	-0.26426697	0.6389818	-2.419262	0.0711813	0.37821484	-0.32097816
A_32_P148122	-0.026772022	0.80071497	0.5839634	0.55443144	0.026772022	-0.08091354	-0.3889513	-0.08679724	-0.9657216	-0.52853966	-0.22937775	-0.55589914	1.2124076	1.1321688	0.52975273	0.3012805
A_23_P23303	0.006233692	0.13134909	0.08318281	0.18940687	-4.956648	0.19528532	0.18770742	-0.40162516	0.50697756	-0.006233692	-0.113951206	-0.042073727	-4.309179	-0.17237043	-0.229527	0.29175615
A_32_P231810	0.11769247	0.63097477	0.38410568	0.66233873	-0.11769247	0.5040026	-0.38584137	-0.82949543	-0.67676306	-1.4756088	-1.2747173	-1.1682339	1.2447867	1.079843	1.2336617	-0.21727467
A_23_P212626	-0.8504076	0.4108119	0.3978486	-1.4486809	2.1874475	0.5612855	-0.99961567	-0.8466368	0.49228668	-1.656949	-2.0422754	-1.4269552	1.5986633	-0.39784813	0.47686243	0.58372974
A_23_P251151	-0.0040488243	0.39214802	-0.3301754	0.10509443	-1.4692945	0.87539816	0.47580194	-0.6016059	-0.376297	-1.0135031	-0.17261791	-0.2601757	0.9334011	1.8077598	0.0040488243	0.71858644
A_23_P82738	-0.029388905	-0.24639273	0.22159624	-0.19192171	-3.557178	0.029388905	-0.30077982	-0.25610876	-0.05202627	0.12539148	0.16482878	0.5218921	-2.8922744	0.18248987	0.32017565	0.12712431
A_32_P172002	-1.5969825	-0.06665945	-1.0432734	-1.8166537	0.5357461	0.6409373	0.98607016	0.4160409	0.06665945	0.06725073	0.49178362	-0.6467862	-0.6461606	0.6525588	-0.25268888	-0.4153962
A_23_P43095	-0.05934429	-0.79122734	0.059343815	1.9885354	3.9444342	-0.3368287	-1.3554225	-0.5404115	0.16909504	1.029458	-1.4706059	2.5203	3.3110318	1.7978983	-1.4014692	-0.5320325
A_23_P323227	0.8462062	0.07391405	-0.30190325	0.87660456	-0.5686765	-0.4223504	0.09969187	0.3007865	-0.19662333	0.29542494	0.40019464	-0.08172655	-0.7542958	0.4235711	-0.4235263	-0.07391405
A_23_P207905	-0.47881365	-0.7016654	-0.016804218	0.031692028	5.9097214	0.05506277	-0.34074116	-0.31152153	0.26344156	-2.4973793	-0.47818136	-2.0220737	5.16992	0.6842241	0.23284912	0.016804695
A_23_P118791	-0.53684354	-1.3212855	-0.02002883	-0.82226825	-1.0052092	0.1010654	0.02002883	0.26556182	-0.13061547	0.12769103	0.06996131	0.45094943	-0.21008086	0.12092328	-0.5630958	0.17208219
A_23_P252748	0.12461996	0.88724947	0.23452044	-0.20374727	-1.5293221	0.36799192	0.55794	0.29334593	0.6872964	-0.025502682	-0.14329004	0.025502682	-2.2133145	-0.4849925	-0.07661295	-0.0878129
A_32_P26461	-0.04988861	-0.31490135	0.04988861	-0.15961075	2.3898025	0.57380676	-0.6395607	0.48987627	0.42397642	-0.38960648	-0.7895069	-0.3061571	2.79567	0.39309692	0.28998804	-0.08774376
A_32_P97253	0.18423271	-0.079208374	0.2853546	0.07453346	0.8430338	-0.18415642	-0.41214943	-0.4336729	-0.72621536	-0.15775871	-0.5873022	-0.07453251	0.81248	0.6207042	0.5170584	0.13896275
A_23_P17438	0.109055996	0.04524517	-1.4997554	-1.3799148	-3.4010992	0.33725214	0.16245174	-0.80136347	0.6304045	-0.045245647	-0.6238766	-0.7629986	-1.6414742	0.352345	0.53057814	0.1751318
A_23_P130333	-3.4706755	0.27902985	-0.27902937	-3.5805435	-4.465946	1.924108	1.7792592	1.5842667	1.1285849	-1.166048	-4.242626	2.329997	-1.582839	-0.67237043	1.4872684	1.0371933
A_23_P149812	-0.07076669	1.1323993	0.16205812	0.034952402	1.6733911	0.059304476	0.043281317	-0.6350138	-0.034952402	-0.40121055	-0.5978706	-0.59229064	1.3544729	-0.28518844	0.53672004	-0.093907595
A_23_P171258	-0.37292767	-0.13398361	-0.056293488	-0.55464363	-1.229805	0.26630402	0.30207825	0.23185158	0.2997446	0.13978004	0.056293488	0.27211094	-1.3002663	-0.2807455	-0.085289	0.06782436
A_23_P26476	0.440557	0.046875477	-0.17054224	0.4245143	0.15037107	-0.15310144	-0.08323431	-0.117984295	-0.109509945	-0.011361599	0.25592566	-0.10024881	0.011361599	0.40161085	-0.3063426	0.0116791725
A_23_P159764	0.18355083	-0.07325268	0.29204273	0.07325268	-0.83972263	-0.20951843	-0.45134735	-0.4598465	0.50576687	-0.17163849	-0.5908098	-0.09085274	0.76646614	0.5839586	0.4758234	0.09712887
A_24_P602052	-0.9208727	-2.18161	-0.15465832	-1.3139863	0.14122057	0.72551346	-0.21879816	-0.013305187	-0.96232796	0.01330471	0.54265356	0.7077651	1.4380784	0.22930813	-1.6391954	0.070895195
A_23_P406330	0.008328199	0.8025682	-0.71479535	-0.3151996	2.7523792	-0.008328199	0.63337016	0.06000638	0.3595488	-0.29626393	-0.024654627	-0.3173535	1.8037846	1.2637355	-0.2584598	-0.44122434
A_23_P97442	0.3620305	0.58451796	-0.2541318	0.29473734	1.5456233	-0.84734297	-0.5449023	-0.35373926	-0.59876585	-0.3644929	0.35680437	0.2541318	0.9565377	0.34317827	-1.0335793	-0.3451705
A_23_P142335	-0.17271328	0.52634573	0.5336795	0.25531673	8.322292	-0.050896645	-0.6590471	-0.44752598	-0.45710373	-1.4163637	-1.0311856	-0.8195276	8.535535	1.3257852	0.050896645	0.20678902
A_24_P642426	0.1836214	-0.07226372	0.29808426	0.07226467	-0.16744423	-0.22476482	-0.47866058	-0.47843075	0.23827171	-0.17975044	-0.5950451	-0.10321236	0.7339339	0.5609369	1.6914654	0.56485605
A_24_P81841	-0.0031285286	-0.7510104	-0.6495023	-0.093726635	-0.26950693	0.8064637	0.13216257	-0.12242079	0.2205472	0.0031285286	-0.098489285	0.4719386	-0.08659029	0.2024455	0.7135854	0.13028955
A_32_P209365	-0.30282402	-1.06178	0.024503708	-0.6007242	-0.24530602	0.58708906	-0.15155458	-0.70331764	0.8905487	-0.8221426	-0.024503231	0.14530277	0.34296417	1.5782108	1.214047	1.0300546
A_23_P413051	-0.30721903	0.2671771	0.95274305	-0.24985933	-3.134976	-0.008488178	-0.17361498	-0.2671914	0.16013193	0.008488178	0.40665388	0.44840384	-1.9454508	-0.0582242	0.095841885	0.1706338
A_32_P128781	0.0977397	-0.47186232	0.21577024	0.067706585	-0.91057634	0.12652063	0.08142042	0.085288525	-0.29705858	-0.1196332	-0.067706585	0.29184484	-0.46135378	-0.09370661	0.17981482	-0.15868044
A_23_P89587	0.3177333	0.35189867	0.64691114	0.59372234	-1.1973333	-0.2022996	-0.88665867	-0.99240685	-0.9858942	-3.2739458	-1.5338879	-1.3631706	0.79220533	1.2128863	0.40494442	0.2022996
A_23_P39647	0.06681204	0.09731245	0.19110632	-0.18305922	2.0298066	-0.06681204	-0.09979582	0.24152422	0.3107276	-0.24414301	0.31619215	-0.46389914	1.3658614	-0.37031317	-0.33614063	-0.19921875
A_23_P390576	0.2818508	0.017137527	0.4061613	0.16712284	-0.789628	-0.13724995	-0.4070053	-0.4056282	-0.6003437	-0.084466934	-0.5061922	-0.017137527	0.7990923	1.0270662	0.5150261	0.14690304
A_23_P31041	0.12530708	-0.8241482	0.24707317	0.044797897	-1.0286064	-0.14324665	0.3658409	0.5393419	-0.23837662	-0.044797897	0.69912434	-0.46513176	-1.5312295	-0.60235214	0.6832361	0.06646061
A_24_P913198	0.43785906	-0.69519377	0.11685705	0.39728737	-0.6096406	0.6245103	-0.80561876	0.5293164	0.029409885	-1.1218934	-0.029409885	-0.7535491	0.5857196	0.2755804	-0.7158952	-0.12038708
A_24_P457226	-0.9614525	-1.3806901	0.28492022	-0.7176199	-2.7198844	0.979095	0.5554695	0.49323034	-0.72542524	0.7215419	0.9918351	0.64062786	-1.6320539	0.8283591	-0.4336524	-0.28492022
A_23_P309837	0.7954316	1.5924921	0.51385975	1.145853	-1.9749336	-0.3651743	-0.034857273	0.37047815	0.034857273	-0.44618845	0.52571774	-0.4844718	-1.2058339	0.18534756	-0.47072792	-0.2617283
A_23_P157879	-0.4335022	0.19097757	0.8865752	0.41664886	-0.23963976	0.02748251	-0.926342	0.008741856	0.24646807	-0.9651356	-0.29519844	-0.8246193	1.2995605	0.9561343	-0.008742332	-0.09517908
A_32_P227845	0.24338102	-0.25852346	-0.036468983	0.26487112	0.036468983	-0.109074116	0.046491146	0.17685938	-0.31474543	-0.25841856	0.07159948	-0.68011045	0.13857985	-0.069238186	-0.12880564	0.3604722
A_24_P307195	1.037549	-0.7723408	1.3740778	0.7736387	-1.1564775	-0.7636404	-1.1057434	-0.63048077	-0.6659126	-0.2051363	0.36536312	0.33882046	-0.5335078	0.2051363	0.6005688	0.73646164
A_32_P115277	-0.29916286	-1.053227	1.2127438	0.15592575	-2.4560833	0.51322746	0.26954842	-0.20984936	0.6495991	0.3025465	-0.15592575	-0.26685238	-1.0535593	-0.21993113	0.9556503	0.18156528
A_23_P69738	0.081064224	0.34474087	0.72027206	-0.51105785	-4.689956	-0.08962822	0.39400673	0.3171816	-0.107687	-0.10077953	0.08514118	0.26914883	-5.720624	-0.21622181	-0.081064224	0.08819008
A_23_P100315	0.04483652	0.26299906	0.46152163	-0.30874014	0.7713504	-0.10764742	0.21372938	0.575768	0.29412794	-0.1053462	-0.04483652	-0.47715902	0.31886435	-0.5116477	-0.2506547	-0.19529104
A_23_P399251	-0.15493917	0.39235878	-0.00793314	1.3964286	-0.17740202	0.00793314	-1.5355086	0.741869	-0.8688283	-0.19969034	-1.9975686	-1.0756526	1.2037606	2.1995392	1.4385104	1.1303577
A_23_P254801	0.4861045	-0.16346312	-0.02374506	0.3214965	-0.61405325	0.32020903	0.28624964	0.33071375	0.44711924	-0.09633684	0.05876112	-0.4941125	-0.9675913	-0.17641878	-0.26296568	0.02374506
A_24_P343695	0.41039276	-0.4514618	-0.5040393	0.5750737	-3.5789251	0.34715223	0.8315363	0.8167205	0.65034676	0.012018204	0.20283985	-0.37655115	-2.8821383	-0.40017414	-0.22873402	-0.012018204
A_32_P197333	0.16528416	0.34004498	1.1030078	-0.12706995	2.425695	-0.16301346	-1.11094	0.47259903	0.018622875	-1.2260451	0.6911688	-1.8835669	1.5689702	-1.1971006	-0.28403282	-0.018622398
A_23_P306507	-0.020874977	0.020874977	-0.9090471	0.024788857	-0.8247347	0.5371933	-0.100216866	0.081749916	0.1380558	0.14739418	-1.9098139	0.30884743	-1.5644517	-0.2623825	0.44653702	-0.18151379
A_24_P347310	-0.19161987	-0.54710865	-0.1608572	1.2515345	2.270979	-0.015789509	-0.55431175	0.665493	0.01996231	-0.54588795	-0.98934937	-0.46543026	1.073976	0.4592657	1.1997824	0.015789032
A_23_P51419	0.08740044	-0.26484013	0.11895752	-0.086001396	-0.5300846	-0.15163803	-0.27964687	-0.29488373	0.24288559	-0.26169872	-0.05418873	0.054187775	0.92046404	0.7378626	0.6544409	0.29305363
A_32_P189093	-0.6090355	-0.34445	-0.41308117	-0.57779026	0.6392102	0.15722513	-0.021612167	0.021612167	-0.8537731	0.15517378	0.6995082	1.5362201	1.3411713	0.5237913	-0.32199383	-0.20537996
A_24_P924118	-0.5491061	-0.89525557	-0.5152154	-0.610579	-0.099021435	-0.7860198	-0.749208	0.2278285	0.19489098	-0.7234359	1.1052141	0.85525846	0.65817404	0.099021435	0.90369844	0.5947747
A_32_P21375	-0.50451136	-0.7162881	1.0893703	-0.5095229	-0.46843195	0.03730154	0.56484747	0.55091715	-0.28403044	0.5678706	0.9553313	0.9401097	-1.2637796	0.19124842	-0.19321394	-0.03730154
A_23_P92569	0.23148298	-0.07781458	0.033735752	0.075184345	-0.7896905	-0.048491	0.34290075	0.39349985	-0.15289736	-0.22229338	0.112432	-0.033735752	-1.34654	-0.21963835	1.6943278	0.15561438
A_32_P162520	0.8139391	0.5511131	0.022034645	1.1923361	0.71415806	-0.14220095	-0.6137161	0.40311527	-0.0042095184	-0.5179324	0.28172684	-0.3823948	-0.45210314	0.0042095184	-0.5354934	-0.21625185
A_24_P128563	-0.095647335	0.027805805	0.19308615	0.20360899	-0.21750784	0.27499342	0.1506753	-0.18380022	0.23023748	0.2288003	-0.3837037	-0.43643618	-0.17256594	-0.027805805	1.1489587	-0.20120192
A_32_P234452	-1.1803803	-1.6231132	-0.40412855	-2.6252189	0.5790272	1.8410807	1.2309384	0.22477055	0.35997915	0.141119	-0.141119	-1.3313546	0.7039652	-1.1942701	0.38118458	-0.64960337
A_32_P122639	-0.13262749	-0.4893484	0.92674065	0.09584284	-3.572277	0.8484273	0.78149843	-0.05997324	-0.39209175	0.32315207	-0.12288046	0.07115936	-1.9593163	-0.12995529	1.3093543	0.05997324
A_23_P84070	-0.13062811	-0.6621442	-0.18061113	-0.20599318	0.19105673	0.35021544	0.433455	0.25021887	0.017821789	-0.032535076	-0.017821789	0.5354428	0.16114855	-0.15552855	0.23616648	-0.20120192
A_32_P17219	0.24350548	-0.08100033	0.2911253	0.11476803	-0.54977036	-4.339218E-4	-0.17203522	-0.19744778	-0.7243986	-0.07149601	-0.54294205	4.339218E-4	1.063981	0.8670707	0.776103	0.4107108
A_32_P82845	-0.2751913	-0.60362244	0.0075907707	-0.023184776	-0.13300514	-0.10056782	0.4029436	0.73600674	0.052327156	0.42877817	0.38834858	0.21768522	-0.15421963	-0.007590294	-0.74633646	0.33132076
A_23_P501276	0.46785784	-0.14978743	-0.4831252	0.55863905	-1.4053636	-0.10344267	0.4327836	0.21812773	-0.24633932	0.24361849	0.15890455	-0.1983943	-1.6422448	0.12793875	0.10344267	-0.42495108
A_23_P385246	0.029180527	0.38851547	0.25621128	-0.099009514	-1.3467741	0.39001656	-0.07822037	-0.18432331	0.42240143	-0.029180527	-0.1255455	0.13853455	-1.1874738	-0.08198929	0.13734436	0.20012188
A_23_P115785	-1.1975968	-1.3991382	-0.80496097	-1.3871119	1.4965351	0.2680695	0.03814006	0.848809	0.41679263	0.32309175	-0.03814006	0.44112134	2.0469692	-0.38165927	-0.23251987	-0.051030397
A_24_P77904	0.059009552	-0.25329876	0.117043495	-0.059009552	8.44754	0.6770258	-0.38393402	-0.4164505	-0.89678764	-0.24962425	-0.7224531	-0.11631489	8.145676	0.65712357	1.2356429	0.5101061
A_23_P250347	0.34243345	0.7683501	0.11090946	0.17745066	-1.998425	-0.24546146	-0.18938446	-0.1729064	0.33611965	-0.038107395	-0.3680892	0.038107872	-0.89917994	-0.07302284	0.24595785	0.2796526
A_23_P111657	1.0502224	0.49605417	0.057920456	0.0058732033	-0.20548344	0.32191038	-1.4273663	-0.6031513	-0.5195675	-0.42632866	-0.26097488	-1.1578436	0.775723	1.2363153	0.5330763	-0.0058727264
A_23_P502170	0.1626606	-0.15554714	0.18906307	-0.14964867	0.23127365	0.5961752	0.33738136	-0.20068169	-0.14884281	-0.1466713	-0.40513992	-0.04126072	0.9062557	-0.2387762	0.5060568	0.04126072
A_23_P44088	-0.007555485	1.3324752	0.007555008	-1.1856508	-2.481616	0.7239218	0.61504126	0.12568331	1.3713017	-0.24160624	0.5835986	-0.7692151	-0.86837864	-0.44268322	-0.053493023	0.71840954
A_23_P147900	-0.8908286	0.19410944	-0.33617115	-0.11684656	-1.5680528	0.060138226	-0.11473608	0.3200493	0.19047117	-0.1813798	-1.0786543	0.029770374	-0.029769897	0.3947749	0.32902384	0.26981926
A_24_P391625	-0.5380111	0.5951948	-0.93149424	-0.13476992	0.039504528	0.4519477	-0.039504528	0.4198537	-0.38727236	-1.442018	-0.7660842	-1.3650107	0.90265036	1.5814853	0.82968855	0.2374425
A_23_P28246	0.050189495	0.55334806	-0.34289312	-1.5085664	2.6994267	-0.26006794	-0.6019378	0.60830545	0.40761662	-0.62031746	-0.050189495	-1.6509051	2.516337	0.392385	0.43038654	-0.5292182
A_23_P6589	0.23561716	-0.25267363	-0.10144186	0.10144186	0.20155668	-0.6319566	-0.32194567	0.19966078	-0.21361113	0.31978655	0.22099447	0.42691755	-0.12469339	0.3704095	-0.42086458	-0.29953432
A_23_P123096	0.17168045	-0.117589	0.24998474	0.06247139	-0.70479774	-0.12990761	-0.33299065	-0.37159443	0.1805315	-0.1412344	-0.60208225	-0.062472343	0.9068613	0.7041092	0.657001	0.2339468
A_23_P146908	-0.1291604	-0.8121848	-0.038324833	-0.19293451	0.16348505	-0.022145748	-0.056324482	0.39195013	-0.27248907	0.47352362	0.19671202	0.62508345	0.4001174	0.1330266	0.022145748	-0.215796
A_24_P56363	-0.3915074	1.1295903	-1.2656109	-0.6328304	1.5750191	1.1268961	1.1499922	0.14921594	1.0250256	-0.14921594	-0.79299426	-0.6676409	0.78277135	-0.71684813	0.5448177	-0.69653916
A_32_P229746	-0.47411394	-0.48968554	0.3301797	-0.14338923	-1.0205388	0.16197348	0.40566778	0.31812048	-0.18889284	-6.2704086E-4	0.119375706	0.595284	-0.40448236	6.2704086E-4	0.65451384	-0.1795888
A_23_P73198	0.17319393	-0.10716057	0.25900745	0.065211296	-0.7325773	-0.14803696	0.46016693	-0.39443874	-0.7530966	-0.1459589	-0.59846973	-0.065211296	0.8780756	0.7216282	1.9328861	0.36410522
A_24_P606239	-0.50269246	-1.2894595	0.43663335	-0.40595937	-0.5500252	0.06193328	-0.1788919	0.2606089	0.8165314	0.3891647	0.53554845	0.41802764	-0.82752585	-0.06193328	0.31375098	-0.25159764
A_23_P99920	-0.15420818	0.23170185	-0.008598328	0.16939735	-0.95007324	0.45185947	0.77447224	0.20751286	-0.28821182	0.38684845	0.008598328	-0.24655056	-0.9922662	-0.21556091	-0.7709789	0.20841312
A_24_P145107	0.36599684	-0.24288416	1.2070928	0.50868845	3.6082215	-0.39785242	-0.61670876	1.4469929	-0.051775455	0.3913436	0.051775455	-0.4991336	3.3304014	-0.22525358	-0.32634544	-0.70157003
A_24_P632230	0.49141932	1.0384736	-0.36651564	0.7408385	1.2362008	-0.20424223	-0.07882929	-0.13156366	-0.5032964	-0.20415354	-0.21683931	-0.041021824	0.46254206	0.80222654	0.77946997	0.041021824
A_23_P151133	-0.07267928	-0.13487124	-0.5023706	0.23784328	1.5602524	-0.18774343	0.07267928	0.5007441	-0.19778514	-0.30669856	0.37929845	0.30447078	1.6737616	0.68979716	-0.17616105	-0.32245994
A_24_P542489	0.0633049	-0.20543861	0.15831518	-0.044834137	2.9844465	-0.28788185	-0.50935936	-0.5373907	-0.8423643	0.5540247	-0.7075224	-0.18636703	5.039944	1.5158081	0.4213891	0.044834137
A_23_P213199	-0.014698505	0.33615255	-0.032724857	0.014698505	0.68340635	0.057545185	-0.2603078	-0.28285933	-0.084909916	-0.7247815	-0.09924841	0.17821169	0.34665632	-0.41292906	1.2055898	0.18124914
A_23_P423348	-0.019281864	0.35481787	0.32436228	-0.14984131	0.9176116	0.45381308	0.019281387	-0.20623636	-0.35434866	-1.3621254	-0.9225235	-1.1469393	1.5177131	1.1864028	0.73814774	-0.079566956
A_23_P24870	-0.3508196	-0.7143688	0.92457104	-0.42765713	4.607086	-0.1408186	-0.008849144	-0.75837994	-0.6199064	-0.114432335	0.6520815	0.37358856	5.3326845	0.008849144	0.47280216	0.1802597
A_23_P59960	-0.6193414	0.2109313	-0.24953318	-0.43478632	-6.0007286	0.49645567	0.83183813	0.06670427	0.33257818	-0.05596018	0.56081915	0.18781424	-5.64817	-0.42505693	-0.122484684	0.05596018
A_23_P26674	-0.3315444	-0.9314904	0.3327651	-0.2566743	0.11660719	0.0761075	-0.50999117	-0.089277744	-0.2927537	0.16516352	-0.31124735	0.3286748	0.9701743	-0.013826847	0.19803858	0.013826847
A_32_P53822	-0.7232785	-0.39136887	0.63040113	-0.21257687	-1.1532593	0.9032941	-0.06794453	-0.28829098	-0.8309598	0.53133154	0.13934708	0.8076749	1.2395492	1.0969024	0.06794453	-0.115722656
A_24_P150791	-0.020253181	-0.52530766	-0.4082079	0.028247833	-5.630061	0.11690235	0.26616764	0.14826298	0.4419136	0.050255775	0.020253181	0.20801067	-5.160597	-0.09624195	-0.36041355	-0.5143709
A_23_P162874	0.29662037	-0.07494068	0.65025806	0.5608797	-1.7177868	-0.007270813	0.048293114	-0.5084219	-0.26756954	-0.060982704	0.4619503	0.4766426	-1.3659267	-0.21843338	0.4419279	0.007270813
A_24_P943352	0.041409492	-0.215209	0.7175493	-0.06740761	-0.97827435	-0.34864712	0.41085052	0.081181526	0.965724	-0.31049633	-0.53363895	-0.23059464	1.4297514	1.3576221	0.33715296	-0.041409492
A_24_P343377	0.22371197	0.18811798	-0.14238262	0.012103081	-0.61145973	-0.04438305	-0.11077213	-0.1365385	0.046257973	-0.14030552	0.041502	0.411685	-0.7011461	0.13250542	0.22943306	-0.012103081
A_23_P7313	-0.2122593	0.8842068	0.11348152	-0.34759808	-4.604018	-0.11348152	0.17036724	-0.5813894	-0.6760502	-0.48121548	0.6796522	0.12942791	-3.1860442	0.11970806	0.85175705	0.24459839
A_24_P239234	-0.18283749	2.7391305	1.0318975	-0.29246616	-1.2266388	0.13243866	-0.8370447	-0.83875656	0.5871062	-0.5418129	-0.9594612	-0.08910465	0.7920008	2.3195372	0.08910465	0.80975103
A_23_P133284	0.13435888	-0.3579955	-0.3406787	-0.096986294	-0.61692667	0.626287	0.72484636	0.061324596	-0.061324596	0.19392443	0.63414335	0.35009336	-0.379745	-0.23608637	0.48973608	-0.18505907
A_32_P27535	0.06404543	0.047025204	0.5951457	0.2089982	-0.24205732	-0.047025204	-0.3971734	-0.27833033	-0.3005166	-0.1677413	-0.33721876	-0.5428386	1.4143605	0.8682332	0.25323582	0.33357382
A_23_P323166	-0.28740168	-0.09181833	0.32615614	0.060413837	-0.453506	0.0057225227	-0.16185045	0.74468184	-0.06859064	0.4996934	0.11208391	0.8008771	-0.54642916	0.28015947	-0.0057225227	-0.23522139
A_23_P4387	0.19876432	-0.044813156	1.8258772	1.362999	-0.8343334	-0.24476051	-0.5055113	-0.49400997	-0.72286034	-0.19558525	0.083307266	-0.1231699	0.70536995	1.66921	0.4193287	0.04481411
A_24_P374154	0.61705256	0.7230191	-1.4502654	0.4004674	0.050993443	0.47373343	0.56224775	-0.050993443	0.43852472	-0.1308074	0.15701532	-0.5124135	-1.0773177	-0.49504328	-0.06970358	-0.65143824
A_23_P50376	0.4698186	0.579123	0.35847712	0.33602953	0.2933278	-0.3775239	-0.38435316	0.42735147	-0.0037674904	-1.1139989	-0.06408167	-0.49956465	-0.4043374	0.0037674904	0.5010743	-0.11552763
A_23_P82402	-0.1142149	0.017896652	0.110136986	-0.083696365	-0.22318745	0.3531208	0.22045422	0.2969389	0.9416189	0.39002895	-0.27514458	0.16259384	-0.65335655	-0.2501831	-0.2658291	-0.017896652
A_23_P418597	0.042099476	0.16916227	-0.55640364	0.21455336	2.3855157	-0.042099476	0.16118765	0.16886663	0.086069584	-0.16544485	-0.29701757	-0.5315156	1.4473834	-0.27631235	-0.1215806	-0.9356208
A_23_P501754	0.12476921	0.51067686	0.24825573	0.010615349	0.99169064	-0.29336357	-0.5650101	-0.5640001	-0.7568369	-0.23890495	-0.6637049	-0.17362022	1.6872387	1.307941	0.35640526	-0.0106163025
A_23_P218892	0.6750188	-0.100615025	-0.5106616	0.86804914	0.21081305	0.14146757	0.2839961	-0.0068268776	0.16147852	0.0068268776	0.017319202	-0.86432505	-0.43898058	-0.3154645	-0.19175959	-0.3786645
A_23_P59700	0.07802725	0.014395237	0.6491637	-0.014395237	-0.31081247	0.2779498	0.03167963	-0.11188364	-0.089672565	-0.057327747	0.063112736	-0.053947926	0.42808008	-0.06792116	-0.21262407	0.45274878
A_23_P56339	0.119820595	0.22113705	-0.45440483	0.10749531	0.4512949	-0.15571404	0.25919437	0.011013985	-0.011013985	-0.21607685	0.1557045	-0.044237137	-0.14630795	0.06058407	-0.35948372	-0.07224369
A_24_P397107	0.08537054	-0.16263723	-0.17399359	0.23546457	-5.8092613	-0.12379885	0.1321559	0.38500834	-0.08537054	0.3807912	0.44811678	0.53065634	-5.4979157	0.21073294	-0.16158819	-0.20708704
A_24_P554408	-0.16884327	-0.49459743	0.2515688	0.14005566	-0.53670406	-0.033405304	-0.43347454	-0.45275593	-1.0682688	0.033405304	0.21164608	0.6496277	0.3830366	0.6171675	-0.35486412	0.23819447
A_23_P326739	0.048211336	0.1410582	-0.048211336	-0.07778144	0.6988013	0.23206449	-0.22716212	-0.5250356	0.30987	-0.50274634	-0.6816299	-0.8256557	0.13661885	-0.64438415	0.14788222	0.17897439
A_23_P253524	-0.0717783	0.026621819	-0.265913	-0.023148537	-3.2088337	0.48299217	0.17042923	0.21135712	0.50881004	-0.071437836	-0.001449585	-0.18729115	-2.8892312	0.001449585	0.533432	0.27583122
A_24_P936637	-0.5856123	-0.9716215	0.801775	5.2182317	-1.3502808	0.8895645	-0.11389637	-0.9430599	-0.66612625	0.17375994	0.11389637	-0.8885746	0.21314049	0.85827637	0.70305586	-0.3803444
A_23_P71530	-0.3844235	0.6229546	-0.4377849	-0.35606694	9.614977	0.5202434	0.19061494	-1.016113	-0.086879015	-0.3183148	0.086879015	-0.13679433	8.314502	-0.38746	0.28720307	0.17986608
A_24_P276385	-0.37261963	-0.12111521	0.25362206	1.3734727	-0.198555	0.12111521	-2.323206	-1.5347977	0.35888004	-0.5676079	-0.8350353	-1.1671495	1.5755825	0.9157376	0.77455854	0.25513887
A_32_P211048	-0.10491848	-0.47816277	0.13329983	2.324151	1.671071	-0.3627596	-0.44273186	0.7205448	-1.1109076	-0.49105644	-0.90620804	-0.39702034	2.4435158	0.54136705	0.4620309	0.104918
A_24_P291973	0.020164013	-0.08286524	0.1819396	0.07164526	0.09112024	-0.14564466	-0.4415021	-0.14722013	-0.0217309	-0.020164013	-0.06657648	0.372478	0.18245745	-0.1635766	0.52009726	0.19488859
A_32_P214471	-0.9087539	-2.0511427	0.7787733	1.0427957	1.6031737	-0.6678405	-2.059401	2.2141042	-0.17677355	0.14474106	-0.2963848	0.1287899	0.44829178	-0.1287899	-0.7773509	0.36205196
A_32_P96000	0.021009445	-0.021009445	-0.7975197	0.770123	-3.3182597	0.10283518	-1.0354013	0.38999176	0.654757	0.7886338	-0.74219894	1.2402644	-2.5431342	1.1301031	-0.6949291	-0.1157279
A_24_P367410	-0.0014333725	0.23217201	-0.4410467	0.2777276	-0.927917	-0.11495495	-0.58516216	0.2562914	0.0014333725	-0.67215586	1.7516556	0.16073656	0.2731123	0.71630526	-0.06367159	-1.1555562
A_24_P927786	0.21051788	-0.14491463	0.24000454	0.029864311	-0.5561228	-0.029864311	-0.1501894	-0.16444206	-0.7850981	-0.14438725	5.726985	-0.063557625	1.0419917	0.86224365	3.2901077	0.41847515
A_24_P589266	-1.1495876	-0.44504356	-1.3761888	0.0361948	5.017255	0.047875404	0.82479525	0.089540005	-0.30048227	-0.036194324	-0.9852271	-2.0950212	3.9589553	-1.1729231	0.56411076	0.27127934
A_24_P349117	0.036993742	-0.84028363	0.40590835	-0.6188123	-3.9973466	0.1700499	-0.036993742	-0.35028768	0.06529832	0.21886325	0.59034896	-0.3967626	-3.38751	-0.7416675	0.07379651	0.10620904
A_32_P170481	-0.4254732	0.03358078	0.42741203	-0.24187231	-3.996801	0.38702297	0.67299414	0.55815744	0.52405024	-0.065609455	0.56911516	-0.13976002	-4.382233	-0.78386545	0.0525136	-0.03358078
A_23_P4179	-0.47795773	-1.4080257	-1.0310287	0.08659172	-0.2978692	-0.08659172	-0.42836952	-0.45373583	0.15191364	-0.8330841	0.5134516	0.64783955	1.3634195	0.6416378	0.98888874	0.6093826
A_23_P379159	0.6942749	-0.10688019	0.15431213	0.8839245	-1.056335	-0.07548714	-0.048610687	0.048610687	0.16834545	-0.05091667	0.31691837	0.3887434	-2.3161693	-0.72203827	0.5060835	-0.119258404
A_23_P116259	0.5723543	1.2652802	-0.28522635	0.67084455	-0.42046976	-0.5575814	-0.71032476	-0.4455886	-1.3035216	0.28522635	-1.1135917	-0.5772786	1.600245	0.32134485	0.8221469	0.5342822
A_24_P115762	-0.059735775	0.2824273	-0.10007429	-0.15167856	1.5227151	-0.3592515	-0.25146627	-0.1959281	-0.19256735	0.12906027	0.059735775	0.3270011	2.3785958	0.31690073	-0.30492735	0.15929365
A_24_P852983	0.26975012	0.793385	0.22463322	0.83156157	-0.23904324	-0.34480953	-0.22463322	-0.2423501	-1.1223149	-1.3656988	-0.876379	-2.0730963	1.7783823	1.9752231	1.0550594	0.61792755
A_23_P167212	0.08188105	-0.20216322	0.15236044	-0.063146114	-1.0330176	-0.60111666	-0.3360877	-0.034790516	-0.72877073	0.08127928	0.4010949	0.26522875	0.034790516	0.33255148	-0.5411973	0.35244322
A_24_P340776	0.118107796	-0.11343098	-0.49147224	-0.38624954	1.8627119	0.121878624	0.2941904	0.44491577	0.35924244	-0.6284046	0.11343098	-0.7673807	0.20219707	-0.87137127	-0.5118313	-0.5286331
A_23_P86315	-0.14295197	-0.14759779	-0.5677624	0.0806241	-1.3492794	0.9186077	1.6034155	1.272479	-0.19076109	-0.020394802	0.4378729	0.6048584	-0.36125183	-0.121079445	0.9989424	0.020395279
A_23_P167081	0.15935898	0.22212172	-0.4247222	0.63509846	-0.24191904	-0.041214943	-0.015009403	0.2561307	0.387465	-0.22256136	0.015009403	-0.48206186	-0.90591335	-0.88261175	0.12228918	0.10534096
A_24_P407717	0.1950078	-0.49021482	-0.05813074	0.36251974	-0.17971754	0.045229435	0.43696928	0.16468191	-0.020571232	-0.011791706	0.24738741	-0.116211414	-0.38006163	0.16043234	0.011791706	-0.13307524
A_23_P156390	0.109894276	0.4427781	-0.20741796	-0.69521856	-7.845944	1.1064963	0.9387202	0.50017405	1.1519761	-0.8400779	0.24200296	-1.0456967	-5.4303355	-1.5077024	-0.109894276	0.6255212
A_23_P117767	0.06783342	0.3521161	-0.36970282	-0.06616926	-0.12460661	-0.21061754	0.06616926	0.2570939	-0.21563292	0.2336936	0.19750166	0.15065241	-0.405622	0.24203444	-0.25193262	-0.071137905
A_32_P198445	0.9896822	-1.0446777	-0.6763258	-0.8487892	-0.27853107	-0.069773674	-0.8300915	-1.2035122	0.0868845	-0.72156334	0.55755043	1.0377626	0.069773674	1.0189066	1.5504928	0.6859431
A_23_P213255	-0.062259674	-0.006299019	0.22370148	-0.091775894	-1.7802534	0.16832542	0.021632195	-0.21221066	0.008568764	-0.055933952	0.15753937	0.11510372	-1.3414097	-0.055473328	0.006299019	0.01689148
A_23_P63999	-0.4022889	-0.18737173	0.23773241	-0.11307764	-1.6711135	0.08471155	0.119307995	0.33064032	0.33715105	0.12970209	-0.07991266	0.27830076	-2.1969132	-0.0568223	0.010304928	-0.010304928
A_32_P201564	0.31841516	0.49710608	-0.19102049	0.4277196	-1.641644	-0.6589656	-1.1383524	-1.1850324	-0.8082328	-2.2067075	0.19102049	-1.4958234	0.605762	0.8516035	1.009274	0.8145871
A_24_P605612	-0.11453295	0.13595057	0.18762732	-0.17600965	7.4504056	0.13331461	0.28876543	-0.05249834	-0.072051525	0.04441023	-0.04441023	-0.27638388	6.9194293	-0.42894173	0.69139147	-0.44343138
A_24_P144527	0.2844782	-0.33218288	-0.071829796	0.14830685	-0.86625767	-0.025048256	-0.17662907	-0.14519787	-0.19377995	0.025048256	0.04795456	-0.1922121	0.28942966	0.34471703	0.047179222	0.44944572
A_23_P112512	-0.0060281754	-0.2380743	0.08850384	-0.07545948	-0.65927887	0.25399685	-0.01184845	0.024446487	-0.37090683	0.0060281754	0.42169952	0.2105217	0.3083601	-0.013708115	-0.50833035	0.18988228
A_24_P459963	-1.3103986	-2.2128415	-0.35078144	-1.1969609	-1.2399588	1.3383164	0.56761265	0.6475935	-0.29031372	1.046268	0.8966589	0.88760805	-0.4582734	0.8628149	-0.08837557	0.08837557
A_24_P762669	2.3496914	0.44840813	0.7666874	1.8127508	-0.24834251	-4.209281	-3.9700785	0.120443344	-2.4626389	-0.9987707	1.8363466	-0.120443344	-0.36645794	1.4577007	-4.2065697	0.59109783
A_24_P320033	0.14211845	1.1749067	0.793272	0.722497	-1.9182034	-0.14211893	-1.071929	-0.9388604	-1.915041	-2.2925558	-1.9561167	-1.5670948	1.4223638	1.7754407	0.9455433	0.7001982
A_23_P10385	-0.08929491	0.12328768	0.070130825	0.17187452	-5.2528143	0.32408762	0.16166353	-0.480433	0.07818079	-0.22067118	-0.109247684	0.006266117	-5.131948	-0.31855536	1.375649	-0.006266117
A_23_P90172	0.11757374	0.32052326	-0.44568014	0.09223938	3.4079514	-0.09223938	0.387228	0.30997276	-0.24742603	-0.45886326	-0.37898445	-0.9892287	2.953618	-0.21679497	0.3398142	-0.48012018
A_24_P193624	0.29843807	0.08150959	-0.25130653	0.21638012	-0.87950516	-0.4248562	-0.18916893	0.07877159	0.03857231	0.22848892	-0.03857231	0.2927847	-1.1786861	0.3526001	-0.06909084	-0.6021509
A_23_P18078	-0.22612572	0.09690714	0.4418521	0.09228897	4.294574	-0.56865025	-0.3986826	-0.13801527	-0.09228897	0.4741292	-0.34602594	0.5119653	4.2102337	0.6917453	-0.4676714	-0.36945772
A_24_P930842	-0.0169487	0.22634983	0.34149265	0.40388107	-0.5683012	0.44731617	-0.5445881	-0.5810442	-0.9442692	-0.3333187	-0.788476	-0.25381088	2.3207684	1.908813	1.5127983	0.016947746
A_23_P11070	0.25859833	-0.020295143	0.34407616	0.15221405	-0.65100765	-0.06441116	-0.27610397	-0.31166172	-0.6671648	-0.059606552	-0.51258373	0.02029419	0.96008015	0.75901604	0.6584654	0.28444195
A_23_P131375	-0.5292578	0.10510445	-0.28927708	-0.5425005	1.334713	0.15573788	0.24839592	0.055724144	-0.055724144	-0.21232986	-0.31941223	0.07405472	0.9939041	-0.8203201	-0.7302084	0.2568493
A_24_P611139	-0.15856314	-0.38860607	0.38227797	-0.18015671	2.042975	0.27255058	0.32380962	-0.18903065	-1.3894339	-0.78945446	-1.237875	-0.708725	1.0002899	0.78748083	0.15856314	1.06883
A_24_P921062	-0.3597293	-0.09313488	0.2921853	-0.100064754	0.009388447	-0.003648758	-0.39184427	0.5845971	-1.2335763	-2.2049317	0.003648758	-1.1711283	1.1447573	0.72186136	0.28108788	0.042960167
A_23_P167276	-0.050753593	-0.095721245	0.25380135	-0.023248672	-1.4797163	0.70708275	0.48942947	-0.030618668	0.68884754	0.092829704	-0.340209	0.023248672	-1.3852682	-0.40030193	0.22082329	0.37215328
A_24_P408321	-0.468513	-0.7690902	0.30670786	-0.5208726	0.3188033	0.15073538	0.027779102	0.068493366	-0.027779102	0.029827595	-0.25650263	-0.271132	0.6819186	-0.39090586	0.16385508	-0.39350557
A_23_P173	-0.18866396	0.0109267235	-0.0109267235	-0.09843016	-0.48503923	0.19327068	0.23210526	0.14498281	-0.46223593	-0.4377284	0.4178934	-0.7411251	0.75132227	0.60355806	0.021829605	-0.07085085
A_23_P104798	-1.1145887	-0.99694633	-0.17384529	-1.5848455	0.59502363	0.6686363	0.82890844	0.24336338	0.08271885	-0.7742796	0.0573802	-0.057379723	1.0736551	-1.3489866	-0.33751106	0.24215317
A_23_P44919	0.13391304	0.20381927	0.7280326	0.76539516	-1.6655922	-0.13391304	-0.8190632	-1.0358725	-0.5423398	0.5742383	-0.5369868	-1.3253016	0.5055804	1.3180208	0.6025195	-0.44585705
A_24_P943613	-0.9237623	-1.4561863	0.6725311	-0.5881548	-1.2580576	0.08812809	0.28763103	0.48825836	-0.045265198	0.9520149	0.028326988	0.55999565	0.05221176	-0.16700745	-0.028326988	-0.13988972
A_23_P434548	0.8530092	0.31831026	0.9634857	1.0269189	-0.46115494	0.21493483	-0.1305089	0.04582262	-1.1620822	-0.73505306	-0.04582262	-1.93649	1.963582	1.0476007	-0.23181725	-0.1030817
A_23_P6381	-0.7904167	-0.29914284	-0.4382205	-0.5894494	3.493854	0.63567305	0.29449844	0.22530079	1.0868402	0.32874584	-1.2122617	-0.246274	2.5691686	-0.26871538	-0.22530079	1.0293713
A_24_P356218	-0.028862953	-0.90549374	0.36722088	0.23186493	-2.037157	-0.63274574	-0.25371456	-0.022249222	-0.8394394	0.022249222	0.53632164	0.6270933	-1.7576056	0.3511076	0.71606636	0.28587246
A_32_P39882	0.18245125	-0.07519817	0.28589582	0.07519722	-0.8271103	-0.20094109	-0.43948936	-0.4517908	-0.7228708	-0.1642685	-0.58980846	4.383934	0.7814541	0.5945945	0.48793125	0.10950756
A_23_P148568	-0.7939906	-0.5748267	0.96810055	-1.2925348	-1.6518993	-0.2052989	0.03936529	0.81026506	0.119874954	0.887383	0.4760909	-0.03936577	-0.396039	0.79921675	0.36514902	-0.3169427
A_23_P218584	-0.32260132	-0.37884235	0.26158237	-0.029171467	-2.4717956	0.86768246	1.0089216	0.55624294	0.46080875	-0.63348675	1.1653957	-0.19086885	-3.6902943	-1.0739369	1.5882349	0.029171467
A_23_P124108	-0.06504297	-0.094108105	0.22326279	-0.15997839	1.6436267	0.118537426	0.43716192	1.8753533	-0.23863268	-0.0934906	0.06504297	-0.110878944	1.6129074	0.92998934	-0.262877	-0.30380774
A_24_P914000	0.2484684	-0.09259415	0.41164017	0.040283203	-3.270413	0.008860588	0.45137882	0.02402687	-0.008860588	-0.50110435	0.70983124	-0.5591183	-2.9103217	-0.3111744	-0.11885548	0.4483881
A_23_P25974	-0.36193752	-0.72048855	-0.17406654	-0.3616209	-0.87854195	0.118881226	0.038380623	0.18831539	0.09380722	0.41737175	-0.19937801	-0.03651333	0.3006811	-0.030006409	0.2646103	0.030006409
A_32_P33213	-0.07518482	1.5247555	1.2111664	1.3996496	2.5923295	-1.3887005	-1.6417933	0.5415454	-0.8301258	-0.1769886	0.07518482	1.1882715	1.817092	-0.6033511	-0.590662	-1.0929861
A_23_P10885	-0.9699502	0.24222565	-0.18810558	-1.0559106	1.6465912	0.44256687	0.1370306	0.08270311	0.64117146	-0.48053455	-0.33383656	-0.4850545	0.64140654	-0.6244974	-0.033470154	0.033470154
AT_L_3	0.25575638	-0.04776001	0.307559	0.15361881	-0.6128359	-0.0155210495	-0.1845169	-0.22980595	-0.6526356	-0.033241272	-0.5026226	0.0155210495	0.9752312	0.8371434	0.6774988	0.32507038
A_23_P35045	0.21084404	0.2749977	0.06968784	0.8651409	-1.5793581	-0.13358212	-0.6899228	1.2048483	0.9347429	-1.1617689	-0.3926754	-0.7865238	0.5072155	-0.06968784	0.3830452	-0.15546417
A_23_P86470	-0.01175642	0.4996152	1.4928069	1.5929618	0.7956891	-0.9343028	-0.3950734	-2.0180664	-2.3540382	-0.4199667	0.72148657	0.50810957	1.1530747	0.01175642	-0.99418736	-1.1867881
A_23_P54953	0.36965036	-0.029742718	0.1140542	0.23851633	-1.1750922	-0.21945715	-0.038580418	0.06512022	-0.03506899	0.20556402	0.0045428276	-0.10203123	-0.9674516	-0.0045428276	0.12423086	0.08609629
A_24_P923723	-0.30850363	-0.6046114	0.5057564	2.461749	1.1330519	-0.018724918	-0.5035353	0.40631676	1.3883424	-0.7066107	-0.44620037	0.43661594	0.18230915	0.018725395	-0.1033926	-0.47479248
A_32_P233769	-0.37936115	-1.2406187	0.5559416	-1.0889921	3.0243864	-1.3931055	-1.664465	-0.4383874	0.061585426	0.030739784	0.9211235	1.2875366	2.3000436	-0.030739307	-0.74275017	0.13259172
A_32_P3131	-0.19227457	0.28135252	0.31977558	-0.02799797	2.5522556	-0.07797289	-0.05360651	0.06285381	0.21977234	-0.6203933	-0.034512043	-0.61530447	2.6962152	-3.528595E-5	3.5762787E-5	0.07231045
A_24_P78862	0.2987728	0.3905244	0.20204306	0.5612478	-0.20204353	-0.2392931	-0.4844842	-1.242569	0.31407785	-0.69451666	-0.72123337	-0.617929	0.48978424	0.74288654	0.29639673	-0.2861929
A_32_P195291	0.011231422	-0.49183464	0.69080925	-0.063308716	-2.386033	0.18768883	0.045053482	0.2263012	0.24733734	0.4265499	-0.30570698	-0.011231422	-1.7541981	-0.1545906	0.46037483	-0.17470169
A_23_P29994	0.10006857	-0.4005046	0.34861326	0.04209757	-1.3173242	-0.14743185	-0.08410311	7.481575E-4	-0.2443862	-7.481575E-4	-0.15150309	0.064135075	-0.96545935	0.027606487	0.027493954	0.14987326
A_24_P944063	-0.060903072	-0.62849855	0.18321085	-0.22140694	0.94112587	1.6390824	0.8361769	0.9786134	0.5918002	-0.22038603	0.34247303	-0.9473624	-0.729301	-1.3116965	0.060903072	-0.8649435
A_32_P55427	0.059809685	-0.22536182	0.1927576	-0.059809685	4.5265913	-0.23742867	-0.6343441	-0.19455624	-0.52850246	-0.29200554	0.68260956	0.30011415	3.222302	0.42301607	0.2787943	-0.07412052
A_32_P503113	0.12617111	-0.16936493	0.26435566	0.0029277802	-0.9252672	-0.28302002	-0.56570435	-0.5955267	0.27581358	-0.21914482	0.12667084	-0.16820431	0.6338439	0.49480438	0.34286356	-0.0029268265
A_24_P911766	-0.84893227	-0.5768094	-0.60392714	3.751038	1.5240865	1.3715429	1.6250405	2.1984143	0.097920895	0.17375088	0.7938514	-2.3254647	-0.52158594	-0.097920895	-0.3697734	-0.4839115
A_24_P664995	-0.0461998	0.4894085	-0.011219025	0.18937778	-1.1040535	0.74740887	0.38750362	-0.08048439	0.9223099	0.38512135	-0.5973463	0.011219025	-2.1806107	-0.18913078	0.26533127	-0.08633709
A_23_P209882	-0.77808094	-0.20773792	2.073124	2.8611922	-0.14076662	0.37608337	-0.93002987	-1.1350985	0.14076614	-0.3198843	-0.3751011	-1.0739708	1.434866	0.68587637	1.4123697	1.079771
A_24_P289299	0.029277802	-1.1813045	-1.2530208	0.39432812	2.0854783	0.4137106	-0.39693308	0.29689503	0.118524075	0.81371117	-3.5223927	-2.849771	1.1583128	-0.39479494	-0.029277802	-1.3195744
A_24_P416301	0.21569729	-0.3383112	0.3784275	0.3046913	-0.93879414	-0.20693493	-0.14034653	0.04774189	0.011886597	0.34835625	-0.12917137	0.012145042	-0.36870575	0.073301315	-0.55274105	-0.011886597
A_23_P154411	0.67132473	0.051732063	0.73787785	0.6964016	-1.3388929	-0.008090019	-0.12337589	-0.19421387	-0.16784286	-0.18046188	0.008090019	0.33427906	-0.93011093	-0.011464119	0.97880363	0.059848785
A_23_P214638	0.733933	-0.05256319	-0.4880643	0.49705267	-0.46192217	0.27669477	0.7814956	0.32351446	0.5517335	0.05256319	0.24434805	-0.6498561	-1.5870824	-0.2943082	-0.21200705	-0.31399488
A_24_P248167	0.49786282	-0.25343466	0.033130646	-0.6132474	0.87687397	0.02741766	-2.109075	0.110224724	-0.20227289	-1.7630086	0.749053	-2.0235858	0.812387	-0.02741766	1.031785	-1.6270213
A_24_P377775	0.092157364	-0.2949419	-0.48841	0.47678852	-2.3390112	-0.056922913	-0.14971924	0.05692339	0.13418102	0.56788635	4.351859	-0.9423747	-0.74263096	-0.92132616	1.2665157	0.23824978
A_23_P254288	0.29681206	1.4001284	0.2817545	0.4813347	-1.2063007	0.10390091	-0.23754883	-0.7738905	0.48173237	-0.10390091	-0.41475677	-0.28977966	-1.1208057	0.34838867	-0.38371944	0.81456184
A_24_P18630	0.123108864	0.34921074	-0.010538101	0.010538101	-1.0160017	0.65391636	0.9422407	0.41239738	0.5480852	-0.19125462	0.08993149	-0.5076771	-1.8217883	-0.48259926	-0.1252737	-0.25030327
A_32_P78311	-0.43961334	0.5419507	-0.7250533	-1.8006039	0.80861235	0.7064791	0.6645274	1.2784972	0.54806995	-1.6089144	0.5458379	-0.8047576	-0.31023598	-2.8279605	0.31023598	-1.024838
A_24_P418044	0.17482996	0.043183804	-0.3770404	0.42451048	3.4657044	-0.18460894	-0.03550768	-0.17698431	-0.28139448	-0.024297237	0.024297237	-0.058674335	2.5149198	0.42387152	0.25103998	-0.21304274
A_23_P28075	0.05509472	0.027503014	-0.37512875	-0.1718893	1.631731	-0.7146797	-0.22949505	0.041749954	-0.26784325	-0.006383896	0.006383896	0.49657917	1.0023174	0.21491528	-0.60858154	-0.2675562
A_24_P687326	0.02144432	-0.44630432	0.039348602	-0.067718506	0.39683723	-1.2251616	-0.27196646	-1.0274744	-0.8416147	0.03204918	-0.016135216	-0.0040826797	1.2004337	1.2539644	1.2548757	0.0040826797
A_32_P126229	-0.04341507	0.00841856	-0.00841856	0.13759089	-0.4154992	-0.40017128	-0.18610287	-0.8333626	-1.0540996	0.80624914	-0.5106664	0.5754976	1.1538849	0.9662504	0.7775655	0.050563812
A_23_P117286	0.10111618	0.17571545	-0.18614388	0.024195671	1.8838091	0.11491394	-0.12953758	-0.23659039	0.23165321	0.33482742	-0.310112	-0.09211826	2.0689726	-0.024195671	-0.32315922	-0.035744667
A_23_P145957	-0.03811884	-0.040904522	0.0067458153	-0.16185808	-1.031239	0.04747057	0.24363661	-0.0067458153	-0.46082163	0.15160704	0.20794249	0.34473562	-0.56658363	0.043213367	-0.32596064	0.4584813
A_23_P152234	0.18386841	-0.14318657	0.22595882	0.05413437	-0.6014576	-0.054135323	-0.22202587	-0.24257469	-0.78860664	0.65022993	-0.603281	-0.061123848	1.0110807	0.81655264	0.7254944	0.36099958
ETG05_36762	-0.76523113	0.051110268	-0.046328545	0.09072733	-0.3141365	0.046328545	-0.25061893	-0.4458599	0.28483534	-0.17679977	-0.4188938	-0.20861483	0.8839798	0.93231773	0.37839603	0.34867334
A_23_P9255	0.20259142	0.6501765	0.4341817	0.5315857	-3.8918877	-0.6044135	-0.2025919	-0.81513596	-0.5642004	-0.74706936	0.2872386	-0.22352219	-0.3246789	0.27726078	1.2523551	0.4138832
A_32_P85539	-1.1777959	-2.0578775	0.4420495	-0.45102358	2.5804095	0.28197145	-0.69042397	-0.6096082	-0.1772809	1.0251546	-0.22133493	0.34581757	4.466974	0.14904547	0.18275738	-0.14904547
A_24_P109721	-0.005979061	0.58182335	0.5438514	0.8702278	-0.23869848	-0.0052199364	-0.20603418	0.0052199364	-0.737278	-0.16902876	-1.2342973	-1.2497029	1.7597208	1.7361999	1.5013862	1.0595942
A_32_P44274	0.08452177	0.13708162	0.6044345	0.0013003349	-3.9878001	-0.26883745	-0.4280963	0.24283266	0.19580317	-0.0013003349	0.1177268	-0.3089881	-3.5192943	-0.099255085	-0.013436794	0.123123646
A_23_P386356	0.594553	-0.976326	-0.6100292	-0.30181694	-1.4804649	1.2995968	1.311717	0.7275524	1.23978	-0.54725266	-0.5515156	0.25495815	0.1336298	-0.067331314	-0.16242218	0.067331314
A_24_P152635	0.33807135	0.77432966	-0.41967344	0.27261114	-0.26713514	0.19722128	0.1924777	-0.17555857	0.014036655	-0.2020917	-0.12215853	-0.10658789	-0.106766224	0.16189337	0.5083556	-0.014036655
A_23_P20578	3.2324543	-0.7336931	-0.69880486	-0.46909237	-1.2070045	-0.18324566	0.087451935	0.54564667	0.13873053	0.5274086	-0.087451935	-1.3283672	-1.1770873	0.96667385	0.46069717	0.25075293
A_23_P71790	0.4145975	1.0992556	0.3940916	-0.11980629	-0.34208107	0.25016022	-0.39990902	0.12417889	0.6211395	-0.24715233	-0.06955433	-1.2442479	0.09624529	0.021321297	-0.0846405	-0.021321297
A_24_P191047	-0.19497323	0.62987685	0.20677495	0.36034894	-0.25251794	0.16217923	-0.16217923	-0.23874211	-0.749912	-0.991863	-1.0887363	-0.84954095	0.77169204	0.98195386	0.46891809	0.41008782
A_23_P104188	0.62029386	0.08547616	-0.3038261	0.44273305	-6.9287653	0.06595826	1.006428	0.69854856	-0.06641078	-0.19215465	0.48633504	-1.1554859	-5.3153915	-0.76695657	-0.032592535	0.032592535
A_23_P325654	-0.857882	0.59314585	-0.41794157	0.38155127	-0.4303975	0.90628624	-0.33097935	-0.48329878	0.22276211	-0.27309752	-0.22276211	-0.26293993	1.5038333	1.1485004	1.0982866	1.0042601
A_23_P205027	-0.12518549	0.0402112	0.16093397	-0.29851198	0.056538105	0.010300159	-0.2873845	-0.29740858	-0.29267073	-0.0154156685	-0.3994727	0.009434223	1.0886483	-0.009434223	0.089846134	0.19124079
A_23_P217009	0.1590805	-0.34416294	0.79565716	0.067946434	-1.2605658	-0.77956915	-0.52794075	0.15037727	-0.067946434	-0.40340042	-0.09873772	0.4858942	0.12619686	0.355134	-0.42638493	0.18476105
A_24_P935276	0.20145702	-0.19274616	0.04908371	-0.04908371	-1.8028193	0.21320438	0.7262554	0.26997375	0.35118484	-0.2808485	0.10136032	-0.64814377	-2.2045088	-0.851171	0.25157738	-0.084560394
A_24_P637651	0.26006985	-0.027671814	0.3362236	0.15460491	-0.61588573	-0.039812088	-0.24464607	-0.28215027	-0.6740904	-0.049110413	-0.51278687	0.027671814	0.995965	0.79328823	0.96659184	0.38739157
A_32_P203292	-0.5550761	-0.47736835	0.9359622	-0.37810612	2.0137997	0.15982294	-0.03299856	1.0432663	-0.29831123	-0.35708332	0.52933025	-0.4370985	1.1781573	0.30923414	0.03299904	-0.119850636
A_23_P207400	-0.2601118	-0.21561527	0.035271645	0.11558056	-3.8982387	0.16933727	-0.035271645	0.06229973	0.14316463	0.20685577	-0.25011063	-0.20950413	-3.0985055	0.23798275	-0.051916122	0.32506847
A_24_P185314	0.12799597	-0.4704709	0.87761545	0.009125233	-0.8162875	0.092298985	-0.057220936	-0.0113835335	-0.040447712	-0.009125233	-0.1490264	0.0692029	0.33707	-0.04246378	0.39645243	0.29883337
A_24_P910504	-0.014988899	-0.29401112	0.06838322	-0.11959076	-0.9203415	0.35223866	0.050563812	-0.58156586	0.96423244	-0.33038044	-0.78589344	-0.251544	0.6908126	0.48951578	0.90061855	0.014989853
A_24_P323628	0.051190853	-0.0013079643	-0.18084955	0.18140268	-0.15911818	-0.4196477	-0.4989562	-0.31353903	-0.4030738	0.0013079643	0.06998205	0.57516813	0.88708544	0.5607877	0.1705308	-0.0841279
A_24_P938433	0.17226219	-0.1028986	0.2588358	0.06759262	-0.7486143	-0.15746498	-0.37280464	-0.40601254	-0.7510328	-0.14709568	0.19971752	-0.06759262	0.8621597	0.6621094	0.5605631	0.1860323
A_24_P204848	-0.28049374	-1.5322886	0.5405307	-1.3638859	-2.18812	0.40401077	-0.44037628	0.16767693	-2.180891	0.22969437	1.1996689	0.81234264	-0.11147404	-0.15555954	0.35363293	0.11147356
A_23_P132526	0.196733	1.0155749	-0.14874983	0.30634928	-0.43967772	0.14266443	-0.14342737	-0.299047	0.502913	-0.1393857	-0.32878065	0.0020604134	-0.618732	-0.0020604134	0.20773935	0.30572844
A_32_P164168	-0.03585434	-0.30524826	0.055297375	-0.14069462	1.9712138	-0.38034916	-0.6013088	0.03585434	0.6342392	-0.36149693	0.24564457	-0.28138065	3.6399431	1.7554226	0.5067668	-0.04600525
A_24_P215407	0.7132237	0.041155577	0.61669517	1.1953852	-1.3997395	-0.6692374	-0.31572843	-0.041155577	-0.21761203	-0.20826411	0.22647595	-0.11761117	-1.7558224	0.10572505	1.1368935	0.063318014
A_23_P77459	0.33783817	-0.32113457	0.18798447	0.12884998	-2.6399336	-0.08549309	-0.006954193	-0.076581	-0.48343277	-0.07973957	0.006954193	0.29893684	-1.6818924	0.19574642	0.05395317	0.14655209
A_23_P389426	0.94104505	-0.26861787	1.0543668	0.6563513	-1.9200194	0.054439783	-0.07825446	0.0053961277	-0.70681596	-0.38014913	-0.1463139	0.31430602	-0.6625416	0.043654203	0.5173743	-0.0053961277
A_24_P384969	0.083872795	-0.8550377	-0.49548244	-0.69753647	-1.5681505	0.36249065	0.7246418	0.7710762	0.32741404	-0.6357479	1.4275761	-0.8469982	0.4996109	-0.083872795	0.5813761	-0.6335316
A_24_P88921	0.34690523	0.16830683	-0.42818785	0.60291433	1.2414737	0.29223013	0.19222498	-0.016850948	-0.14135313	-0.21999788	-0.25862455	-0.71643114	1.0367942	-0.22102976	0.016850948	-0.41368628
A_24_P312790	0.296803	0.36551237	0.56445694	0.7611475	-0.29680347	-0.3563881	-0.64648104	-0.6688318	-2.2390437	-1.6260219	-1.292695	-1.6459866	2.1894774	1.8818274	0.39067936	0.5727906
A_23_P72668	0.18209839	-0.07654667	0.28244114	0.076545715	6.198043	-0.19421291	-0.43004417	-0.4452181	-0.26937675	-0.15926552	-0.58906174	-0.08007145	5.273324	0.60366917	0.49796915	0.11957359
A_24_P936845	0.0011537075	1.0407474	0.091171026	0.46405768	-0.65837836	-0.032942057	-0.13620591	-0.06337094	0.8652513	0.06542659	-0.824527	-0.6108296	-0.47232842	0.45249152	-0.0011537075	0.24865317
A_23_P103486	0.39976692	0.31018734	0.2649727	-0.16892052	-3.12286	0.26414776	0.19075108	-0.068982124	0.012198448	-0.012198448	0.8148432	-0.0791502	-1.5986128	-0.35123777	-0.31560373	0.35460472
A_24_P114255	0.021247387	-0.0019564629	0.21301174	-0.101178646	0.43207312	-0.4467249	-0.0012288094	0.17982149	0.11101675	-0.14499903	0.0781436	0.24687147	-0.91101265	-0.81129694	0.0012288094	-0.30940628
A_32_P186821	-0.025004387	0.56933403	1.1662207	1.0568962	-0.6254873	-0.043683052	-0.5108166	0.025004864	-1.084682	-2.049695	-0.64853525	-1.9725494	1.8258085	1.9724126	0.51143885	0.14688015
A_24_P923757	0.4957404	-0.3058548	-0.030371666	0.5083027	0.354362	-0.50666857	0.30749798	0.8109684	0.020995617	-0.07639599	0.70007277	0.45103598	-2.1602788	-0.59917355	-0.15498304	-0.020995617
A_23_P218523	-0.011384964	-0.11780357	0.7829218	0.15131664	-1.2682238	-0.08496475	-0.3702879	-0.027612686	0.011384964	0.52878475	-0.054286003	0.35526752	0.9986601	-0.21486664	0.14260292	0.076174736
A_24_P644556	0.10586071	5.909952	0.21421146	-0.0010919571	-0.9378042	-0.29499245	-0.54756355	-0.54873943	0.42101955	-0.24860096	-0.6699171	-0.17404556	0.8474045	2.5298395	0.37840223	0.0010919571
A_24_P929246	0.2683525	0.013944626	0.37792492	0.16097164	-0.7806673	-0.13521194	-0.39021492	-0.3899641	-0.62763596	-0.08751488	-0.5083504	-0.013944626	0.82442284	0.6485596	0.5354719	0.1587429
A_23_P29851	0.3424039	-0.21881056	-0.53432035	0.5029216	0.42832708	-0.001270771	0.2292409	0.001270771	-0.06135702	-0.008173466	0.114179134	-0.727057	0.366117	-0.085981846	0.01506567	-0.079425335
A_23_P314202	-0.74727917	0.27957344	-0.24278736	-0.80948496	1.4473515	0.20280647	0.33167744	0.15546608	0.03801918	-0.14063454	-0.2107172	-0.03801918	0.81992245	-0.32170534	-0.16289234	0.22750473
A_24_P489639	0.67575836	-0.19883347	0.062927246	0.99733067	-1.5415859	0.16486168	0.36611462	0.0014791489	-0.0014791489	0.27012157	-0.30560493	-1.1262112	-1.133594	-0.008091927	0.41582775	-0.040032387
A_32_P181621	0.27391815	0.016523361	0.38842964	0.16493034	-0.7913704	-0.13787365	-0.4023676	-0.39871883	-0.61551476	-0.08543301	-0.5075178	-0.016522408	0.8085761	0.6408601	0.5216818	0.1484642
A_24_P63118	0.122281075	0.48996544	-0.2712469	-0.13753605	1.5060024	0.716835	0.55845547	-0.122281075	0.3439293	-0.20148373	-0.633502	-0.7121544	0.72353554	-0.5567169	0.15485	-0.6503048
A_32_P31757	-0.11319351	-0.6836233	-0.15151453	-0.58562803	-1.3488393	0.03079462	0.021075249	0.37864828	-0.16359186	-3.3521652E-4	0.802371	0.44162273	3.3521652E-4	0.4125476	-0.30571365	0.23257828
A_32_P43711	0.13867855	0.82615185	-0.03258753	0.443676	-2.3373542	0.16240215	0.14280081	-0.38976288	0.029432774	-0.19736576	-0.029432774	-0.41133356	-1.4112434	0.073179245	-0.15494728	0.16385365
A_24_P382724	0.16354895	0.18771124	0.45396852	0.5774903	0.6607051	-0.16757059	-0.031123638	-0.26383734	0.031123638	-0.63759947	-0.5338836	-0.4107728	0.21195841	-0.25906372	0.74536085	-0.30004358
A_23_P114616	-0.47843027	-0.70684385	0.23534822	-0.3166108	0.14047861	0.35037947	-0.17505503	0.06670046	-0.16891146	-0.10288954	-0.04684782	0.23908758	0.31961584	-0.13912916	0.43085623	0.04684782
A_24_P148026	0.049588203	0.014014244	-0.6908083	-0.042158127	0.6381116	-0.3058052	-0.39039946	0.19413519	0.057667255	0.27583218	-0.014014244	0.21316576	-0.46694613	0.26805353	-0.7097993	-1.089797
A_24_P311856	0.6502824	0.005633831	0.27859735	0.73403597	-3.9678183	-0.3057294	-0.7607808	-0.059073925	0.09782171	-0.45517778	-0.005633831	-0.73354197	-2.6992912	0.19038343	0.21326208	0.037884235
A_32_P170454	-0.07514906	-0.34914637	0.47619295	0.079882145	-5.0095983	0.07514906	0.20481825	-0.2139163	0.16822767	0.18896914	0.44813108	-0.57545996	-4.3251653	-0.49025774	-0.13539457	0.16870356
A_32_P15838	0.017540932	0.81648064	0.671998	1.1200328	-1.0356922	-0.017541409	-0.7187991	-0.271492	-0.72758293	-1.2827573	-0.56857586	-0.40659618	1.2023606	1.6523829	0.7278185	1.1636562
A_24_P803801	0.018595219	0.92716265	-0.018595219	0.21259356	-0.02031374	0.278152	0.24177217	-0.23093748	0.42907667	-0.47403097	-0.8048177	-0.9661298	-0.6026797	-0.49536467	0.2462058	0.1777339
A_24_P418250	-0.21019459	0.016334534	-0.022690773	0.07938194	-2.7208853	0.90151787	0.7988739	0.20591259	1.4196024	-0.4986744	0.054409027	-0.8195429	-2.7859054	-0.77481174	-0.016334534	0.7711077
A_32_P92489	-0.6767049	0.07549715	0.6665735	3.312807	2.508237	-0.057991028	-0.41459417	0.3848219	-0.15436411	-0.76701593	-0.43145466	-0.970191	1.9189343	-0.22362232	0.114988804	0.05799055
A_24_P348892	-0.47630358	-0.056928158	-0.7534561	0.096885204	1.2486959	0.14578485	0.21186876	-0.16546965	0.2651286	0.19550085	-0.16878748	-0.016261578	1.4032416	0.016261578	-0.022415638	-0.104521275
A_23_P121622	0.18537521	-0.19253922	2.2405262	3.031311	0.079826355	-0.07982731	-0.1441536	-0.17004204	-0.82289314	-0.21163368	-0.61512375	-0.1105299	0.9921856	0.82797146	0.74778557	0.3924322
A_24_P126093	-0.3177414	-0.065227985	0.38554	-0.10350323	1.7672067	0.27906895	0.06522751	-0.3773632	0.2191906	-0.38482428	-0.5306139	-0.70237875	1.1781578	-1.0099812	0.7227917	0.38835144
A_23_P50907	-0.22054052	-0.07813692	-0.2942996	-0.018064976	1.3355403	0.3867879	-0.005312443	-0.19372797	0.005312443	0.18117666	-0.3862567	0.058837414	1.5775838	0.0750947	0.2724309	-0.017499447
A_32_P810645	0.070672035	-0.29538727	0.097592354	0.64904594	-0.6915817	-0.17939758	-0.27302933	0.016968727	-0.016967773	-0.304801	-0.7280798	-0.21452427	0.89191914	0.84808254	0.83858967	0.2806301
A_24_P936688	1.3595476	-2.5735397	1.219235	1.5767989	0.3239231	-0.5474148	-2.7423315	0.0027050972	0.09967327	-0.002705574	-0.055450916	0.3626995	-1.3671904	-1.0436287	-0.135005	0.34679556
A_24_P926450	0.71159506	0.47339487	0.12326765	-0.51434755	-2.585454	1.5358062	0.9403577	1.5082908	1.886766	-0.17859602	0.7327008	-2.8856435	-4.328145	-0.79373026	-0.12326765	-0.16680479
A_23_P413761	-0.09309292	-0.3451481	0.35392094	-0.046975136	-2.7349215	0.2293396	0.20575619	0.17096424	-0.26041698	0.22148609	-0.13938904	0.32034016	-2.0347767	0.046975136	0.46387768	-0.09357166
A_32_P47643	0.046110153	-0.60735035	1.4656553	0.23396397	-9.363211	-0.32022858	-0.56863594	-0.40584373	-0.9686346	-0.046110153	0.8373413	0.13190174	-7.7657223	0.38947678	0.86979675	0.46024132
A_32_P131583	-0.54986906	0.30408716	-0.075992584	-0.026760101	-4.1792927	0.60092735	0.16330147	0.32096052	0.38843203	0.4720502	-0.56925774	0.011109352	-1.8805914	-0.037189484	-0.011108875	0.16306114
A_24_P921050	-0.3008895	2.989769E-4	0.2599454	0.8122935	-0.3239932	-0.5353408	-0.67168474	-2.989769E-4	0.06583071	-0.6420398	-1.0947156	-0.5655055	0.5342889	1.7705541	1.3681722	1.3145227
A_23_P51996	0.5183902	-0.6355977	0.80331564	0.2044301	-1.2092061	0.15386534	-0.19500017	-0.19690561	-0.41698027	-0.088733196	-0.030774593	0.06701326	0.030774593	-0.07108736	0.41086435	0.22487974
A_23_P44956	0.11087942	-0.29586172	0.4113345	0.27009153	-1.1208234	-0.28211164	-0.2668023	-0.024448872	-0.6913705	0.070390224	-0.009284496	0.41697073	-0.063566685	0.5232196	0.009284496	0.3095622
A_24_P294821	-0.030177116	0.06435442	-1.2361298	0.08686018	1.3737493	0.3196106	0.40342283	-0.41938353	-0.4379449	-0.7682133	0.03017664	-0.8104439	-0.06254768	0.049570084	0.39558887	-0.83955383
A_23_P146997	1.223599	-0.4677329	0.72722673	0.9338584	-1.566359	-0.40169382	0.046631336	0.01989603	-0.46673346	-0.24724817	0.63601923	1.1143994	-2.2693172	-0.060911655	1.3364701	-0.01989603
A_24_P409230	0.06265259	0.41442156	0.059082508	-0.059082508	0.4977212	-1.0304408	-0.854939	-0.5577712	-1.7170005	-1.6017566	-1.1287365	-2.6382928	1.9122739	1.1911702	0.5344386	0.16871738
A_23_P41054	-0.42876053	0.81814194	-0.30970478	-0.667223	0.52996254	0.5181904	0.7432976	0.017411232	0.65406036	0.20364666	-0.017411232	-0.27036572	-0.2631092	-0.51447964	-0.07533836	0.14884949
A_24_P941708	0.0879426	-1.6098123	-0.34494638	-0.96887255	2.7147417	-0.0879426	-0.36871433	2.3717957	0.35430574	-1.5087972	2.011351	1.7459912	0.27470827	-0.6604247	1.5764766	-0.90481234
A_23_P350617	0.42466307	0.91415024	0.19204998	0.02802515	-3.4187374	-0.15416813	0.331501	0.1475563	-0.14157963	-0.5619459	0.3901143	-1.7365575	-1.8060532	-0.028024673	-0.20560455	0.080043316
A_24_P109661	0.08652973	0.35947418	0.13047123	0.46159077	-2.606659	-0.29901505	-0.26803493	-0.24553013	-0.3995123	-0.17991829	0.3773861	-0.08652973	-1.4651709	0.2194128	0.09154892	0.2515459
A_23_P136874	-0.65977716	0.45983362	-0.0034461021	0.0034461021	0.8567605	0.39679384	-0.05227709	0.060189724	0.26554155	-0.17025709	-0.60232687	-0.26742983	-0.05551195	-0.21149969	0.6777692	0.15369654
RC7	0.22586632	-0.0118255615	0.30547428	0.20541477	-0.58329964	-0.006464958	-0.28493023	-0.23821545	-0.7004757	-0.04049778	-0.50691795	0.006464958	0.9838705	0.8395386	0.6689186	0.3293562
A_32_P118942	0.030023098	0.14060068	-0.030023098	0.23337889	-3.540358	-0.8204694	-0.61835814	0.5791497	-0.9866767	-0.52484083	1.3188882	1.1008639	-4.3310313	0.38397837	-1.3341541	0.68833303
A_23_P170581	0.11671114	0.109120846	-0.039634705	0.6557393	-0.82723427	-0.40023756	-0.57849264	0.0124435425	-0.0124435425	0.023169518	-0.027395248	0.46215487	-0.20117044	0.47977972	0.3326578	-0.07855892
A_23_P132654	0.19344807	0.098210335	-0.37060118	-0.090839386	0.008194923	-0.18997622	-1.4999342	-1.6390901	-0.008194923	-0.85226154	0.6978278	0.69783926	0.025856972	0.5748005	0.105968	-0.062158585
A_32_P896811	-0.49144077	-0.532403	0.67934656	-0.5986414	-2.6898165	0.28768873	-0.4728384	0.17798233	0.24737358	-0.1779828	-1.2561884	0.204494	-1.0758972	0.6543217	0.7639518	0.271389
A_24_P285055	3.4832306	0.70438814	0.10933781	1.1418376	-2.7711844	-0.33946848	0.13056374	0.4266882	0.30288935	-0.53744555	-0.8226733	-0.10933828	-2.261981	-0.20793295	0.92657423	-0.37270355
A_24_P266880	-0.18001652	0.48005867	-0.19522953	-0.029406548	1.1164885	0.064655304	0.21555614	0.106144905	0.14998913	0.029406548	-0.1450367	-0.4506197	1.2139902	-0.20902824	-0.24094296	-0.05458927
A_23_P148175	0.008712769	0.5901818	0.13915539	-0.008712769	-1.5798416	0.05277729	-0.2490139	-0.44822216	0.15161037	-0.12971926	-0.6846714	-0.6796222	-0.7529731	0.5302954	0.42874432	0.33061647
A_24_P122682	-0.5954046	-0.2153902	-0.2930069	-0.6035929	0.04713154	0.10016632	0.26988697	0.36460304	-0.15946674	0.08778095	0.10769558	0.055303574	-0.21746445	-0.04713154	-0.1252718	0.07415104
A_24_P50759	-0.24722385	0.81156015	0.27137566	0.6299257	-0.96194935	-0.97821283	-1.6939788	-1.5128446	0.10064173	-0.57508945	-0.95298386	-0.100642204	0.6867738	0.68986607	0.2964077	0.43968773
A_23_P169470	0.6463032	0.69965076	0.949276	0.47266197	-0.42557907	-0.35547256	-0.35445118	-0.60832024	-0.37119007	-0.2892437	0.18592453	-0.016155243	-0.4547243	0.016155243	0.28817844	0.5165529
A_24_P81740	0.14324045	0.61884737	-0.08781004	0.21176577	-1.0440259	-0.2355361	-0.04573679	-0.07234907	0.11090803	0.06539106	-0.088244915	0.35619402	-0.9161258	0.041980267	0.08735037	-0.041980267
A_23_P119042	0.172894	0.9681821	-0.15302706	0.56095123	0.15302658	-1.5065737	-1.6115003	-1.1895742	-0.8814583	-2.251111	-1.3874168	-1.474369	1.8442316	1.3787875	0.92684317	0.35193968
(+)E1A_r60_a135	-0.3262205	-0.65323496	0.009222984	0.14152622	0.33745384	-0.67454433	-0.5626421	-0.062604904	0.44444752	1.0206652	1.6126537	1.9602013	0.4766488	-0.009222984	-0.57362366	-0.58952475
A_23_P65278	-0.12954473	-0.27097845	0.6568141	0.29715776	-0.31163836	-0.19656515	-0.66829634	-0.034094334	0.034094334	0.35066175	-0.74525976	0.26802206	0.6804681	0.43697977	-0.31382418	0.45143175
A_24_P49411	0.0036735535	0.11797142	-0.50212765	-0.3237648	1.1096115	0.06673336	0.28199196	0.19134331	0.4226427	-0.23366547	0.38397408	-0.48370838	-0.0036735535	-0.73646927	-0.75757694	-0.353467
A_23_P126135	-0.2304678	-0.41531754	0.20339775	-0.09329605	-0.9762039	0.057088852	-0.024821281	-0.12921429	-0.24889946	0.25660992	0.024821281	0.06521416	0.041890144	0.17874622	0.23563099	-0.177804
A_24_P920992	0.25743484	-0.022180557	0.33905602	0.15432549	-0.6440525	-0.058862686	-0.27069283	-0.30566978	-0.67022896	-0.055309296	-0.51335907	0.02218151	0.9673166	0.7657685	0.6650009	0.29138374
A_24_P705701	-0.8306799	-0.08832312	-0.7477884	-0.9337282	0.27754116	0.4237919	0.13873911	-0.35770655	-0.42888737	-0.75415325	0.08832359	-1.067316	1.640605	1.5337944	1.012166	0.38038397
A_32_P17615	-0.09842491	0.19817019	0.69259644	0.111206055	0.44481754	-0.28763056	-0.9318156	-0.1440177	-0.80299664	-1.2439919	0.03125763	-1.0390029	1.0959587	0.4455986	-0.03125763	0.22832727
A_23_P422204	-0.09377909	0.45817232	-0.23545551	0.03620863	-0.77362204	0.44218874	0.35660887	-0.13607359	-0.023875713	0.04194975	0.023875713	-0.1727252	-1.1941552	-0.16426516	0.23178053	0.06485748
A_23_P77020	0.014558792	-0.099876404	0.15900803	-0.008218765	0.12174225	-0.3714819	-0.5048733	-0.5001545	0.10173893	-0.08950424	-0.24371529	0.064208984	0.6046667	0.008218765	-0.2789278	0.093735695
A_23_P210872	-0.022126675	0.58601713	-0.30362082	0.31328154	0.92901945	0.00659132	-0.019676685	-0.12569857	-0.18365622	-0.4228387	-0.00659132	-0.30067778	1.0656323	0.35872984	0.23292112	0.14216566
A_23_P96369	-0.031064987	-0.63758373	0.6227684	-0.28202248	-3.8615499	0.17180538	0.034546852	0.031064987	-0.41230488	0.3410263	0.27412796	0.2222271	-3.3623939	-0.10071945	0.078110695	-0.12927437
A_24_P49447	-0.5863223	-0.091445446	0.3948903	-0.2575574	0.49336386	0.25867796	0.0045866966	-0.30571318	-0.0045866966	-0.03132105	-0.12197447	0.04946661	1.0266147	-0.024882793	0.37498808	0.20488882
A_23_P410233	-0.3983121	-0.571877	-0.49597883	-1.1255379	-0.89161205	0.68082905	0.57428694	1.2600827	2.2910151	-0.072380066	0.072380066	0.2850814	-0.492671	-0.07802963	0.10559368	1.6312547
A_23_P29939	-0.06691837	-0.19969273	0.027825356	-0.36891842	-2.1673088	0.1933279	0.13571835	-0.035233498	0.2251854	0.7755556	-0.1773529	0.60039806	-1.2241135	0.57937527	0.66146374	-0.027825356
A_24_P24092	-0.5635209	-0.00676775	0.05767393	-0.3717475	-0.32094622	0.29165697	0.21900892	-0.45480013	0.23575735	-0.28600264	-0.41641092	-0.8444934	0.015791416	0.00676775	0.13547564	0.14894629
A_23_P66306	0.1581111	0.10915041	-0.12362623	-0.08656168	0.07832098	-0.17967558	0.15170813	-0.023536205	-0.19562674	-0.006166935	0.5449786	0.006166935	0.02669096	0.038268566	-0.5279765	-0.23352098
A_23_P392457	0.1759913	-0.2715547	-0.7200239	0.08738494	0.37623143	-0.08738494	0.15341973	0.17833543	-0.120957136	-0.7118051	0.13621259	0.131284	-0.48223615	-0.3548143	0.24940467	-0.61585736
A_23_P254626	-0.46307945	-0.40850735	0.05259323	-0.14603806	1.4657564	-0.024814606	0.010252953	-0.017734528	-0.044456482	0.5216398	0.057436943	-0.010252953	2.381194	0.37992	0.19576263	-0.05901432
A_24_P11462	-0.07842398	-0.06860399	-0.2758174	-0.13260269	3.403881	0.102148056	-0.016187668	0.016188145	0.26731396	-0.5535259	-0.13515282	0.18795013	2.9406981	0.66773224	-0.16038036	0.35599566
A_32_P109794	-0.32503605	-0.09709072	-1.1391554	-0.3120365	-0.8839102	0.68878746	0.7125473	0.6047373	0.6660185	0.58356476	0.18941784	-0.034600258	-0.6862526	0.034600258	0.8421564	-0.17927933
A_23_P334083	0.21535206	-0.09004021	0.6548476	-0.35666084	-0.10807896	0.21931839	-0.09938383	-0.2879715	0.15687227	-0.7247925	0.5554223	-1.7199783	0.116728306	0.72015905	-0.14695978	0.09003973
A_23_P42353	0.034026623	-1.1703191	0.18725014	0.26362944	2.025302	-0.93165064	0.08991194	-0.4043665	-0.2325654	0.7365465	-0.23772001	-0.034026146	2.4082265	0.43082952	-0.09438896	-0.4094348
A_23_P214411	0.04555607	0.24322319	-0.31100273	-0.25259495	-1.0179024	0.5176344	0.5770502	-0.14860153	0.474185	-0.3862152	-7.286072E-4	0.21316147	-1.1997976	-0.30721378	7.286072E-4	0.091109276
A_23_P129433	-0.5020232	-0.09048796	0.84861994	-0.4606204	-0.28826475	0.011871815	-0.40784216	0.44840193	0.34620142	-0.07310152	-0.55808115	0.013930798	0.5751271	0.38944578	0.6844144	-0.011871815
A_24_P916979	0.63692	0.21488953	0.80862	-0.87199163	-0.11294317	-1.2872443	-1.5442462	1.9993501	0.03275442	-1.2378459	1.1749411	-0.03275442	0.22163057	-0.50486946	-0.6188388	0.53563356
A_23_P348257	-0.33493662	0.124932766	0.10499048	-0.25935507	0.5946326	0.01279211	-0.013692379	-0.4206071	-0.51423407	-0.3038745	-0.005335331	0.12105703	0.6507735	-0.2469945	1.1841378	0.005335331
A_32_P157945	0.0074310303	-0.65988827	0.29809856	0.20518875	-1.3758421	0.20784664	-0.05645275	-0.0074310303	0.29080868	0.3362341	-0.96313286	-0.41528034	-1.8334475	-0.40336227	0.61908054	0.19966984
A_23_P334798	-0.1712203	0.25586224	-0.023814678	-0.056978703	0.51746607	0.07400465	0.4980302	0.023814678	-0.117516994	-0.37341928	0.66496325	0.43677616	-0.46995592	-0.5278325	0.15743399	-0.17220402
A_23_P147431	0.93394375	0.5518961	0.53565884	0.9983463	0.07655811	-0.35608006	0.1203413	-0.20479679	-0.07655811	-0.08487415	0.6687012	0.24941158	-0.65740395	-0.109975815	-0.15012169	-0.1359396
A_24_P200219	-0.094419956	0.1672101	-0.0074915886	-0.23140287	-1.1916242	0.0074915886	-0.5276532	0.65574217	-0.34308004	-0.48007154	0.7971902	-0.41440058	0.40631628	0.24117994	0.11906576	0.43519974
A_23_P12514	-0.17302847	0.18505716	0.015045643	-0.07865858	3.2078557	-0.015045643	-0.07484579	-0.09010172	0.15519667	0.13150835	0.07225084	-0.015594006	3.2475505	-0.10212183	-0.56354094	0.14997435
A_24_P339611	-0.005112171	-0.047560215	-0.3845439	-0.4689498	0.0120129585	-0.16084814	0.21058416	0.22646856	-0.3324275	0.062403202	0.40282202	0.52034235	0.3890233	0.005112171	-0.20661116	-0.006025791
A_24_P119165	0.11319065	-0.4965105	0.20080376	0.12789154	-1.0311327	-0.39295673	-0.36288357	0.008721352	-0.42126846	-0.008721352	-0.017429352	0.300004	-0.020720482	0.51237106	0.32036877	0.19818592
A_23_P386442	0.28224945	0.013363838	0.40367985	0.17003918	-0.78998756	-0.13204098	-0.40872478	-0.41049194	-0.5969124	-0.07290459	-0.50729465	-0.013364792	0.7978349	0.64194727	0.510272	0.14684296
A_24_P261383	0.03306055	-0.061388493	0.91418695	-0.24430132	-0.18804502	0.19879961	-0.34364748	0.5816369	-0.31337118	0.13441896	0.16175604	-0.39016104	0.4149003	-0.03306055	0.279696	-0.25698233
A_24_P406664	-0.01829195	-0.24520922	-0.8578682	-0.48330164	1.301806	0.21134424	-0.1974926	0.01829195	0.06344843	-0.113604546	0.15370417	-0.31292152	0.6591277	0.6024809	-0.4019146	0.55119133
A_24_P931583	-0.2057147	0.28415108	0.28460026	0.5011325	0.1434722	-0.1434722	-1.1862526	-0.87811804	-0.9825611	-1.7897482	-1.1715994	-0.35707378	1.633595	1.1361489	0.47595978	0.14350891
A_23_P168836	0.06022978	0.23734283	-0.027561188	0.3346038	3.7296805	-0.14531755	-0.061696053	-0.102650166	0.36130428	-0.14074469	-0.29509592	-0.5065932	2.8600302	0.027561188	0.20950556	-0.51209784
A_24_P127425	0.3534658	0.43886542	0.04951358	0.52035546	-0.946748	0.09018636	-0.17449784	0.10988021	-0.04951358	-0.31760812	-0.121653795	-0.19927621	-0.5155499	0.5553911	0.41950822	-0.28567863
A_24_P127051	-0.4097991	0.60345125	-0.6344018	-0.2913022	2.378137	-0.5566335	-0.2929988	0.05290842	-0.03926897	0.03926897	-0.3078246	0.613009	1.8025718	0.36471033	-0.34249258	0.09825754
A_24_P109101	0.061733246	-0.23909187	0.19957829	-0.061733246	-0.7213049	-0.16227722	-0.62673473	-0.22494888	0.99612	-0.104249	0.36906624	-0.22782898	2.4241958	1.7330608	0.6222048	0.8626685
A_24_P152793	0.6035414	0.4053793	-0.18962955	0.30554485	-0.9312668	0.60728645	0.49563217	-0.21724415	-0.029330254	0.029330254	0.07044411	-0.5008383	-0.8466072	-0.25801563	0.0752449	-0.2988224
A_23_P258340	-0.9448581	-0.3651166	-1.1523938	-1.1940722	0.06465006	0.17060614	0.47559404	0.42062235	-0.06653738	-0.03087759	-0.2455926	0.03635645	0.048637867	0.03087759	0.34153795	-0.33088923
A_32_P22364	-0.09524107	0.20336103	0.238832	0.61380386	-1.1223798	0.09524107	-0.4107237	-0.2580409	-1.3105655	-0.3065033	-0.16573763	-0.3498788	1.0916986	1.5022836	0.9078989	0.93808126
A_24_P500771	-0.10382652	-0.47786522	0.8985243	2.660029	3.0758219	-0.36441326	-0.43620682	0.7096443	-1.1106911	-0.49489975	-0.12944603	-0.39620686	0.7067213	0.5413294	0.45973396	0.103827
A_32_P156136	-0.1837492	0.18544579	0.12500954	-0.033391	-0.24893665	-0.25574398	-0.48019886	0.43070126	0.050397873	-0.37084103	0.5386267	0.79253006	-1.084382	-0.22092533	0.84547424	0.033391
A_23_P322735	-1.2709737	0.08858061	-0.21758986	0.715857	-1.8301978	0.14678383	-1.1547074	0.2068553	0.1463046	-1.7824879	-1.5445113	-1.2252145	-0.08858061	0.15925646	0.18974781	0.8490987
A_23_P164284	0.19319868	0.5607524	-0.46998358	-0.10436869	-4.153503	0.018025875	0.7102742	0.6082511	0.06289625	0.1099906	0.675365	-0.018025875	-3.8827848	-0.14350557	-0.091831684	-0.28819704
A_32_P19135	0.2682917	0.19524884	-0.28130698	0.16815734	0.96571326	-0.17087483	-0.006282091	0.16260266	0.2788427	-0.41136336	-1.0544727	-1.7532489	0.32323337	-0.66042304	0.006282091	-0.5796683
A_23_P115022	-0.020851135	-0.23533535	0.68659306	-0.22763443	-8.446587	-0.16678238	0.020851135	0.19612694	-0.17651844	0.025838852	0.53001976	0.15196705	-7.216584	-0.0769825	0.075307846	0.068216324
A_24_P936327	0.20635319	-0.14608479	0.23347664	0.031169891	-0.5571041	-0.031170845	-0.1534853	0.1986599	-0.7891121	-0.14589405	-0.5888834	-0.06519508	1.038641	0.8602848	2.2865028	0.41433048
A_24_P892464	-0.34229088	0.81434584	0.2948656	0.80716133	-0.47084522	0.0041337013	-0.83110046	-0.0041332245	-0.70889235	-0.78159285	-1.6143785	-1.4268413	1.0691257	1.2968278	0.81631374	0.770566
A_23_P128706	-0.28966713	-0.13857555	3.2424927E-5	0.61911964	1.8490744	-0.4099331	-0.5215063	0.57795143	-3.2424927E-5	0.4775753	-0.13653755	0.9394264	1.1584682	0.33733273	-0.50584507	-0.08010769
A_24_P346101	-0.26769686	-0.5452547	0.10327673	-0.21616793	0.32727766	-0.051269054	0.64554405	1.1536512	-0.0056552887	0.7275114	0.0056552887	1.1729631	-0.7744093	-0.12477255	0.8687582	-0.372406
A_24_P914088	-0.009037018	-0.26539516	0.19664764	-0.44628906	0.009037018	0.30195522	0.9015789	0.6757889	0.39422417	0.18149185	0.30928898	-0.02422905	-0.56225204	-0.33909225	-0.2884941	-0.16838074
A_23_P144384	0.14188385	-0.043660164	0.109972954	-0.36314106	-2.9115648	0.4940462	0.31379128	-0.032987595	0.3851223	0.18087101	0.016788483	-0.15461922	-2.5365028	-0.40480995	-0.016788483	0.11761856
A_24_P114334	-0.35995722	-0.358109	-0.07695627	-0.1577487	-2.5694203	0.089986324	0.26788092	-0.036893368	0.0020184517	0.2924857	0.053394794	0.5584798	-2.5458484	0.1349206	0.05873537	-0.0020184517
A_24_P117138	0.14907694	0.008664608	0.31363058	-0.2526765	-1.7206597	-0.25847292	-0.0126719475	-0.008664608	-0.17216349	0.06858206	0.054337025	0.38233805	-1.1430993	0.22490549	-0.188478	0.20918131
A_23_P40527	-0.018291473	-0.34823418	0.018291473	-0.1502266	-0.7966871	-0.25166798	-0.415246	0.5810938	0.83071375	-0.33660126	1.0345883	-0.26613903	0.81388664	0.6221733	0.5308552	0.16679859
A_32_P111873	-0.4432211	-0.34545422	-0.40479946	0.567996	0.6487365	0.25716972	-0.19382429	-0.28468418	-0.55164623	0.7376585	1.8840485	-0.68852425	1.85678	0.19382381	1.0396028	-0.2624445
A_24_P213396	-0.37165642	0.6490345	-0.533123	-0.50574493	1.258214	0.19209957	0.06182289	-0.12708378	0.17638493	-0.08818817	-0.43435287	0.16026306	1.3081055	-0.19936752	0.09399128	-0.06182289
A_23_P331992	-0.09680319	0.023790836	-0.023790836	-0.43789673	-0.29117632	0.35998678	0.30649185	0.45000172	0.41168594	-0.3759861	0.22513008	-0.64263964	-0.11545515	-0.86566734	0.036397934	0.2381897
A_23_P63896	0.27520347	0.14194083	-0.020302534	0.020302534	2.8216455	-0.021666765	-0.062707186	-1.119839	-0.3809092	0.60940814	-0.6779063	0.30589747	2.9600494	0.06671929	-0.05785823	-0.505913
A_23_P48217	-0.9466138	0.030768394	0.08733797	-0.12055588	2.8264513	0.5756564	-0.030768394	-0.07515049	0.07242203	1.1833372	-0.91425943	0.34828758	3.2014427	-0.062380314	-0.24444532	-0.60240126
A_24_P470794	0.8715811	0.6660743	0.86634445	-0.3442979	-0.17892885	-0.020590305	0.37584066	0.020590305	-0.024834633	-1.2686772	-1.2417283	-1.7057881	0.31935453	1.1075406	0.78902626	-0.67071295
A_32_P2177	-0.31157684	0.25191736	-0.11919594	0.2501073	-0.15674162	-0.2553439	-0.28794432	0.095256805	-0.4220872	0.12701273	-0.5600295	-0.095256805	0.8967881	1.4309831	0.55197144	0.97511387
A_23_P131846	0.020731926	0.21873951	-0.3801031	-0.073884964	0.72803974	-0.7226124	-0.30690002	0.1599865	0.09972	-0.2243557	-0.22299862	0.19716454	0.82419205	-0.020731926	-0.7924566	0.28904724
RC4	0.22383499	-0.012134552	0.29222775	0.18260765	-0.6330652	-0.029128075	-0.20368767	-0.24232292	-0.66662025	0.0014133453	-0.5188675	-0.001414299	0.9867716	0.8289676	0.67932796	0.32106686
A_24_P941845	0.50588703	-0.29840994	-0.8063965	0.38492632	-0.35209942	0.5982466	0.61611414	0.2851491	0.04408741	0.23688841	-0.116838455	-1.3876185	-0.580091	-0.04408741	0.04845047	-0.6541624
A_23_P344194	2.898332	-0.17384481	-1.7187996	0.26861668	0.08046198	0.34246397	0.027141571	-0.47570944	0.4202199	-0.027141094	-0.44523907	-0.6017666	-0.9878373	-0.13589907	0.22839117	0.22342491
A_24_P936155	0.5403404	-0.71003056	-0.3481102	-0.51409435	-0.17317009	0.7630515	-0.8698034	0.34648132	-0.19076824	-0.2930956	-0.33285236	0.19198799	0.5386801	0.17317009	1.5550642	1.005764
A_32_P71736	0.26711893	0.4739871	-0.10453558	0.041156292	0.6724591	-0.40507364	-0.3644786	-0.28952837	-0.74568415	-0.041156292	0.40021658	0.090043545	0.9024987	0.20792246	-0.45822382	-0.108175755
A_23_P69491	-0.15872097	0.27738762	-0.1335516	-0.18979931	1.1554556	-0.04033661	0.0025997162	-0.0025997162	-0.029772758	-0.0026960373	0.20366001	0.7574711	1.0453386	0.29586315	-0.043013573	0.31742954
A_24_P110172	-0.5122242	-0.807107	1.4760098	-0.6156473	-1.3604565	-0.34098053	-0.9919014	-0.6290636	0.21419144	1.0671101	1.4642768	0.48396015	0.252594	0.049471855	-0.049472332	0.35655594
A_23_P39605	-0.051314354	-0.17560625	0.051313877	-0.10794592	-3.5572548	0.5957875	0.44305944	0.1553464	-0.62394476	-0.9837408	-0.19705105	-1.3610296	0.693305	1.1611629	0.39778137	0.34614325
A_32_P218228	0.4235475	0.050166845	-1.017175	0.5013082	1.4414327	-0.19229436	0.23980021	-0.5646565	-0.19955945	-0.13123631	-0.32720494	-1.1938608	1.2043178	0.6298902	0.01851964	-0.01851964
A_23_P111712	0.19812584	0.16984844	-0.35018063	-0.00908947	-1.8033152	0.3418274	0.54514027	0.20660782	0.07101345	-0.019890785	0.00908947	-0.21400547	-1.3035731	-0.3729868	0.26430893	-0.020505905
(+)E1A_r60_a22	-0.19437218	-0.92708683	0.0068616867	-0.0068616867	0.13682556	-0.7682028	-0.3127079	0.3213129	0.4483366	1.2274666	1.8680763	2.0082417	0.08569527	-0.0970602	-0.51824284	-0.50229836
A_24_P242299	0.03356123	-0.38622904	-0.2819152	-0.28518915	-1.2428336	0.36648607	0.24185514	0.19485807	0.051751614	-0.04442358	0.38867235	0.13153028	-1.166656	-0.17483187	-0.020267963	0.020267963
A_24_P58579	0.0040225983	0.7266989	-0.19123554	-0.187294	-0.0040225983	0.38129234	1.0034666	0.4946785	0.22827816	-0.09503651	0.16907787	-0.050276756	-0.8915968	-0.3238306	0.11372185	-0.22919178
A_23_P55099	0.13091564	0.41462326	-0.8049259	0.0040278435	1.8871984	0.13810539	0.11102915	-0.81854343	-0.0040278435	-0.10590553	0.066651344	-0.9692955	1.2910304	-0.52286243	-0.2650447	-0.48978376
A_32_P19724	0.10655403	-0.1714201	0.18790817	0.005224228	4.4035926	-0.21118164	-0.42502403	-0.4590273	-0.0052251816	-0.20522499	-0.66337013	-0.12822533	4.3504243	0.6115155	0.5103817	0.59729767
A_23_P342585	-0.45271873	-0.9604912	0.86784077	-0.39246702	-2.3242855	0.6803169	0.12388182	0.996027	-0.43326855	0.7641053	0.6386728	-0.12388134	-0.7127538	-0.913713	0.6513033	1.0823889
A_23_P1871	-0.17070055	0.8868513	0.66348696	0.50494766	-0.46277523	-0.1344862	-0.5577102	0.13448668	-1.093986	-1.1873627	-0.88393927	-2.7249575	0.8988981	1.700047	1.2614121	1.0297775
A_32_P99019	1.1829634	0.6517558	-1.0150232	1.0135188	-1.7072687	-0.00674057	-0.54936886	-0.50813866	0.75938416	-1.2743807	-0.045975685	0.00674057	1.1707029	1.4574862	-0.105891705	0.19486141
A_32_P105747	-0.015964508	0.015964031	0.3575015	0.69303036	0.12638092	-0.8051672	-0.9987745	-0.8188553	-1.1666136	-1.9889517	-0.5974393	-1.9368649	2.3544292	1.3109426	0.8934312	0.8659525
A_24_P161581	0.53615427	0.9453969	0.3461256	1.0750833	0.06204939	-0.7938037	-1.4222593	-0.44720316	-1.2846818	-1.2540689	-0.06204939	-0.29995346	0.657248	1.5202231	-0.2751503	0.24971533
A_23_P211007	-0.34909678	-0.11038828	-0.51537466	-0.24349451	0.9135928	0.18525648	0.2032237	-0.27117586	-0.32716417	0.23625708	-0.101790905	0.15420008	0.8242688	0.101790905	0.13562346	-0.23197412
A_23_P52903	0.5779748	0.027147293	-0.6678467	0.61386967	1.800714	-0.29991817	-0.027147293	-0.12939262	-0.16969776	-0.4483781	0.4035511	-0.5089779	1.426846	0.1359582	-0.71852493	0.42053318
(+)E1A_r60_a104	-0.038686752	-0.09966087	0.05015087	-0.041428566	-0.4500332	-0.28106213	-0.47677708	-0.45766068	0.7747216	-0.12920189	0.70121	0.811203	0.7254858	0.56273174	0.38730717	0.0386858
A_23_P156198	0.13288546	0.4344411	-0.045302868	0.65492105	0.14384413	0.031704426	0.28666353	-0.25907373	-0.21912146	-0.19767237	0.6666417	-0.61311865	-0.26443958	-0.031704426	-0.06530523	0.118778706
A_23_P144179	-0.417202	0.5532007	0.37534904	-0.41949177	0.021840096	0.33440685	0.18077469	-0.18844986	0.45009518	0.20665741	-0.8249197	-0.42154694	-0.021840096	-0.12308407	-0.18451977	0.71998405
A_23_P27180	-0.05491066	0.054696083	-0.1389637	-0.19122696	0.05114746	0.20336342	0.36631012	0.0072841644	0.027097702	-0.0072841644	-1.1807032	0.010126114	-0.041054726	-0.4985304	0.10649681	-0.28379536
A_24_P288779	-0.32132387	0.82374334	-0.2222743	-0.42426348	-0.729033	0.75323915	0.011775494	-0.7648139	1.5058174	0.08070803	-0.05187273	-0.5839801	2.0469565	1.9343143	-0.011775494	0.82793427
A_23_P7412	-1.5962205	-0.48556042	0.5962987	-0.71495056	-5.356021	0.12760162	-0.12760162	0.20856762	0.29487133	0.14865923	-0.23553944	0.17459297	-3.7459707	-0.31023884	0.36575747	0.22144938
A_24_P42001	-0.24258184	0.14463282	0.6990199	0.22751951	0.13392544	-0.2831149	-0.7562885	-0.10457277	-0.15665102	0.20435095	0.107385635	-0.929893	0.104572296	0.7613783	-0.13470268	-0.3329296
A_23_P168909	-0.92270947	-0.043531895	-0.08385229	-1.1495652	4.65452	0.2577424	0.119170666	0.043531418	-0.28584862	-0.34223938	-0.7949562	-0.21122503	3.5779705	0.53648853	0.32394266	0.19821262
A_32_P138366	0.70758533	0.6322012	0.31634426	1.0716476	-0.1491642	-0.313406	-0.71986485	-0.13997364	-0.5459423	-0.7476759	0.470788	-0.24512196	0.07044792	1.359232	-0.07044792	0.18480968
A_23_P254353	-0.1856966	0.056227684	0.6715045	-0.056227684	2.1987681	-0.14331532	-0.58147764	0.71237135	0.52017355	-0.63631964	-0.7246227	-0.50448275	1.8893704	0.19240904	-0.15727758	0.33585835
A_24_P109432	0.43874407	1.5055928	-0.55257607	0.19408321	1.5485921	-1.9619908	-0.8864393	1.4946532	-1.349369	-0.6214962	0.09206581	-0.09206581	0.74579334	0.34304428	-0.1764226	-0.6934056
A_23_P152995	-0.18012094	0.6716509	0.5474067	0.6362486	-0.5340886	-0.25715017	-0.56774044	-0.77370167	0.15857506	-0.33069706	-0.03313303	0.15832615	-0.1366291	0.5820198	0.4326067	0.03313303
A_23_P135669	0.24241352	0.34957504	0.28048706	0.24656916	-2.0091128	0.015097141	-0.01764679	-0.04754591	-0.36965466	-0.6213908	-0.78312206	-0.38416386	0.34761143	0.85927916	0.7444005	-0.015097141
A_32_P138939	1.0863614	1.1580591	2.0884628	1.134728	-1.673327	0.9207096	-0.31239557	-0.5414448	-0.3903737	0.9615369	2.4397821	-1.1718125	-0.34081793	0.31239557	-0.629776	-1.0048308
A_32_P3214	-0.260818	-0.50427675	-0.0051779747	0.0051779747	2.4397483	-0.62339497	-0.26434374	-0.9161434	-0.44067526	0.2470355	0.103989124	0.24336863	2.1003766	0.3049779	0.28874445	-0.38171577
A_32_P849727	0.274086	0.015831947	0.3871317	0.16678905	-0.79407215	-0.1366911	-0.40490246	-0.40091038	-0.61430645	-0.08109188	-0.5079136	-0.015831947	0.8061352	0.6392422	0.5181365	0.14666939
A_24_P419058	0.275589	0.015666008	0.39011383	0.16764641	-0.79467773	-0.13617611	-0.40662575	-0.40290833	-0.61086464	-0.079553604	-0.5077801	-0.015666962	0.80347157	0.63870525	0.5156822	0.14568043
A_24_P289366	-0.01959896	0.4259243	-0.18049431	-0.096728325	-0.58300686	0.8195076	0.6769924	0.18501568	0.73044586	0.01959896	-0.3167963	-0.32464504	-0.88302517	-0.35731316	0.16147852	0.25910187
A_24_P355246	-0.32552004	0.090445995	0.52258444	0.04901457	-2.2852821	0.38134718	0.2120347	-0.12596273	0.12686586	0.1827817	-0.40276098	-0.04901457	-2.000691	-0.15387487	0.16445112	-0.12869787
A_32_P119736	0.013889313	0.7260566	0.8546386	-0.2848735	-0.9250307	-0.01388979	-0.66217947	1.5562224	0.307436	-0.46183348	-0.01994133	0.014664173	-1.5495229	0.23857117	-0.6309643	0.33495426
A_32_P64263	-1.2335768	-0.6575422	0.07352018	-0.47860003	0.8021598	-0.05603838	-0.95471525	-0.56955814	-1.2578964	0.06426096	0.17283201	0.77516127	1.635663	1.47897	0.05603838	-0.58198166
A_24_P938352	-1.0960732	0.086511135	0.21425629	-1.2088928	5.9206686	-0.020849228	-0.5289359	-1.071948	0.40643978	-1.4465113	0.2515483	-1.1132145	5.4637527	-0.73569775	0.020848751	0.6244173
A_23_P165408	-0.025045872	0.3759799	-0.24686575	0.030393124	-4.938538	0.20468283	0.588078	0.025045872	0.3757348	0.24128771	-0.3957696	-0.291759	-5.376654	-0.55673456	0.10746336	-0.10791826
A_23_P131771	0.23404932	-0.18885946	-0.16570807	0.006067753	0.76083803	-0.006067753	0.20707655	0.032889843	-0.32197332	0.039290905	0.19542551	-0.74960756	0.9857297	-0.18049765	-0.30642748	-0.24220705
A_24_P313262	-0.28860188	0.6924753	-0.4940958	-0.15189457	0.14123344	0.5049286	0.76013374	0.29711723	0.33963966	-0.2420702	0.076452255	0.015514374	-1.0203409	-0.33558273	-0.10948658	-0.015514374
A_24_P542797	0.21036243	-0.081513405	0.34236717	0.09097481	-0.5158844	-0.19587135	-0.48048687	-0.5066776	-0.65520954	-0.12959671	0.6191635	-0.08089161	0.7211914	0.57750845	0.42812586	0.08089161
A_24_P283000	0.1695838	0.13317823	-0.9230256	-0.08610821	1.9102244	0.7957473	0.94783926	0.01827097	0.70017576	-0.6358175	-0.17711687	-1.5094957	0.5155115	-0.6987777	-0.01827097	-0.4677391
A_23_P6201	0.038052082	-0.26574564	0.22546959	3.8096638	-1.5994911	-0.36191654	-0.32329607	-0.034326077	-1.6085143	0.034326553	-2.3949156	-1.2310119	0.9039421	1.6917119	0.307539	0.7872338
A_23_P104199	-0.6454725	0.5965471	0.3637991	-0.11939716	3.248849	-0.0230093	-0.13720512	-0.4668436	-0.25150967	-0.08943558	-0.2192936	0.0230093	3.1416073	0.055487633	0.7184992	0.33900642
A_23_P210100	-0.77403545	1.859127	0.280231	2.1091704	3.064907	-0.3753171	-0.61320496	-0.23981905	-0.7879653	1.7636514	-1.6369886	-0.10023737	4.7975063	0.56440973	0.10023785	-0.16775084
A_23_P84929	0.8185835	0.21925545	-0.36529064	0.31202412	-1.5793419	0.06669712	0.35941696	0.15921497	-0.10757542	-0.14428139	0.489913	-1.1781473	-1.6106596	0.29953194	-0.10021782	-0.06669712
A_23_P93623	0.0024504662	0.33556604	-0.035411358	-0.0024504662	0.8778806	-0.62656546	-0.5963588	-0.4095521	-0.08982611	-0.17786837	0.14975977	0.4133706	0.98688936	0.25914907	-0.66824484	0.23056269
A_23_P88643	-1.0132608	0.5611644	0.23739243	1.4346633	0.3017788	-0.4190688	-1.7472382	-0.23739195	-0.502851	-0.50727844	-0.8121171	-0.73808384	0.49789238	1.2357526	1.1203008	0.6347065
A_23_P24104	-0.46580887	0.082221985	0.0871954	0.11306667	0.14170837	-0.20891857	-0.58876705	-0.6542597	-0.2706232	0.030647278	-0.4531784	-0.0070753098	1.2168474	0.37099648	-0.015768051	0.0070753098
A_24_P93371	0.21567917	0.33076286	-0.13402843	-0.013412476	-0.12587929	-0.31280708	0.013412476	0.058730125	-0.30094528	0.06417179	0.12486076	0.21313572	-0.2901373	0.38424778	-0.13384819	-0.046639442
A_24_P80532	-1.2859383	-0.8015642	0.018453598	-1.0231571	1.3512192	-0.16323566	0.043631554	-0.23228073	-0.018453598	1.0128956	-0.7895317	0.77355576	1.4977837	0.26216984	-0.52415943	0.2678833
A_23_P144746	-0.92457056	0.029181004	0.4914732	-0.15973043	-1.015862	0.93820906	0.69225264	-0.58988285	1.037211	0.74887943	-0.42433405	-1.0622253	-0.68099403	-0.029181004	0.92737293	0.12596035
A_24_P37946	-0.86899066	0.23759341	-0.82404923	-0.7446258	0.7690046	0.7879846	0.10523677	-0.31022477	0.6282909	-0.21152806	-0.98222566	-0.75291944	0.5300262	2.8595397	-0.021870852	0.021870852
A_23_P216080	0.064237595	-0.13734722	-0.06114626	-0.10693169	0.31473064	0.046509743	0.32444763	0.117209435	0.04069519	-0.17031097	-0.06357288	-0.22944736	0.16398144	-0.22626543	0.11690807	-0.04069519
A_24_P344711	0.0984683	0.03627634	0.32215357	-0.16721869	2.0735211	-0.039465427	-0.03627634	-0.44024706	-0.42829657	0.52099466	-1.0987048	-0.26744986	1.3350282	0.45117903	-0.15224218	0.10202265
A_23_P211436	0.19589186	0.9049945	-0.7296529	-0.06101179	-0.43254995	0.4490304	0.5540395	0.015255451	0.61501074	-0.020029545	-0.015255451	0.26064444	-1.0384269	-0.14463186	-0.31017256	0.09883642
A_23_P216812	-0.16425514	0.014378071	0.50364923	-1.1290712	1.9888797	0.69705343	1.0682044	-0.014378548	0.7246442	-0.08834982	-0.8870506	-0.9203205	2.3497314	0.14119673	-0.06866312	-0.22996998
A_23_P18806	0.049061775	-0.35871887	-0.2701559	-0.07820511	1.2841845	0.0919857	0.30190372	-0.049061775	-0.25588894	-0.18815708	0.18178463	-0.19819164	1.1595488	-0.3651905	0.1639595	0.08934307
(+)E1A_r60_a107	-0.66306496	-0.84721565	0.103014946	-0.12260914	0.16026068	-0.65520906	-0.3320322	0.041724205	0.3269639	0.99218225	1.5249639	1.767035	0.46491957	-0.04172373	-0.6756873	-0.495615
A_23_P342934	-0.21185112	-0.27676868	0.07113838	0.0701828	-2.9020715	0.6263418	0.66617584	0.48703766	0.19238758	0.24386215	-0.4908676	-0.36342144	-2.6727648	-0.18014288	1.2753286	-0.0701828
A_32_P124773	-0.68417597	-1.2626705	0.6383896	-0.53359747	-0.02911377	0.02911377	0.38373518	0.27679968	-1.1577597	0.18440962	0.52394485	-0.18868971	1.6917224	0.7475128	-0.10449743	-0.50241995
A_32_P175098	-0.0016183853	0.16940117	-0.48186493	0.14253235	-2.505662	0.30372906	0.5155077	0.26630688	-0.2228508	-0.343503	0.02630806	-0.37510872	-2.8990088	-0.16707993	0.59525967	0.0016183853
A_24_P785853	-0.058290005	0.018013954	0.5733919	-0.8892784	-0.048794746	0.93122053	0.9741368	0.6416545	1.1498408	-0.018013954	0.38654518	-0.06178713	-0.9718523	-0.32320452	-0.097215176	0.6758795
A_23_P96990	-0.021578789	-0.39966202	0.21422386	0.15073109	-2.5225506	0.0030679703	-0.17974281	-0.29505825	-0.18047428	0.025255203	-0.0030679703	0.0624218	-1.3316784	0.1017704	0.092555046	0.12566757
A_24_P578437	0.41660714	0.5578091	0.3217938	0.91882443	-2.040964	-0.38802838	-0.44070363	-0.07765889	-0.35403895	0.04250455	-0.15418172	-0.04250455	-0.16169572	0.8766296	0.7372148	0.66723704
A_23_P410746	0.6753402	-0.43881273	-0.63557005	0.79203844	-0.6539755	0.14874506	0.2079835	0.40379953	-0.37241364	0.03007698	0.5187187	-0.1897583	-0.8788233	-0.030077457	-0.45751905	0.10827637
A_24_P569812	0.23975945	-0.07316208	0.28808308	0.12849903	-0.56163025	-0.0061063766	-0.19086361	-0.21544933	-0.72154236	-0.06277084	-0.5413103	0.006105423	1.051919	0.853322	0.75741386	0.39113092
A_24_P99090	-0.06463289	0.30971384	0.03325224	-0.6597395	-1.5157843	0.6525445	0.6474767	0.08806753	0.46093988	-0.03325224	-0.8007293	-0.41673183	-1.712697	-0.43003178	0.16401196	0.48469305
(+)E1A_r60_1	-0.28140926	-0.55043983	0.0031938553	-0.048989296	0.5338774	-0.21718216	-0.074053764	0.17638683	0.16796589	0.55315876	0.60779953	0.9860945	0.63091946	-0.0031938553	-0.46218586	-0.5240145
A_32_P154561	-0.027251244	-0.33342934	0.027251244	-0.13365078	1.2700477	-0.28311825	1.5980906	-0.06964111	-0.9816866	-0.32703018	1.0391102	-0.25744343	0.77061796	0.5696912	0.4724908	0.6485958
A_24_P153880	-0.15779305	0.8054819	0.50592136	-0.64489365	0.50751686	0.45873833	0.032608986	0.09683895	0.5836725	-0.85805655	-1.0849094	-1.404705	0.027683735	-1.3433065	-0.16016054	-0.027683735
A_23_P68773	0.02270937	-0.6939802	-0.97461796	-0.12516785	0.47888517	0.80363035	-0.05201626	0.39746094	-1.9640636	-0.37016582	0.29084778	-1.2619944	0.5477948	-0.022708893	1.2370477	1.2065983
A_23_P107750	0.35773182	-0.8128948	0.37321186	-0.25158072	0.3385296	-0.78097534	-0.9780493	0.18335438	1.0322251	-0.8124323	-0.18335438	-0.7415161	0.26740932	0.50633335	0.42908478	-0.4020214
A_24_P50950	1.0879335	-0.4679489	0.73948574	-0.94714546	-0.9153614	0.12700367	-0.12700415	1.7518144	0.642786	-0.3641014	0.41122532	-0.6072979	-1.3915248	0.4439683	1.4054279	-1.1419024
A_32_P163247	-0.24899197	0.78119993	0.38020086	0.3263731	-1.330399	0.06324768	-0.063247204	-0.28231478	-0.56447935	-0.81069183	-0.5153179	-0.8125305	0.9653864	1.3191633	0.64684486	0.3131361
A_24_P471242	0.5227165	0.72047615	0.048075676	0.6696148	-2.3713856	-0.048075676	-0.11832142	-0.34106445	-0.41198063	-0.22899246	0.27156448	-0.48098278	-1.4921513	0.25968933	0.6413822	0.14959621
A_32_P209472	-0.25140476	-1.0418873	0.12930155	0.5991311	1.4160433	-8.635521E-4	0.045589447	1.4138722	0.15062666	-0.7407608	8.635521E-4	-0.36670017	-0.035683632	-0.01116848	0.43317747	-0.23198843
A_32_P221907	-1.5473604	-0.25763178	0.4670124	0.48132515	-1.09694	0.13133812	0.04551983	-0.4548111	-0.68157196	-0.24996376	-0.04551983	-0.7117529	1.61304	1.313817	1.2008133	0.83175516
A_24_P222000	0.39165974	1.0710545	0.17298174	0.013803959	-4.698478	0.28801823	0.18063688	-0.42744207	0.5290766	-0.4632535	-0.40171242	-0.4668846	-3.0859609	-0.4711027	0.067279816	-0.013803959
A_23_P24784	-0.16680145	0.5309925	0.4179263	-0.09329271	-2.536076	-0.005186081	-0.6405797	0.005186081	0.63407564	0.10836887	-0.3328266	-0.40615892	0.3424673	0.464077	0.23618174	-0.46788263
A_23_P111995	-0.6237378	-0.8594279	-0.0048937798	-0.15862131	2.7917266	0.04107046	-0.14465475	-0.063029766	0.08064222	0.6688838	-0.20296335	0.02792406	3.449616	0.0778718	-0.07258177	0.0048937798
A_23_P142447	0.31027412	0.34503365	0.37694645	-0.06590986	0.34409046	-0.056937218	0.08338547	-0.30592299	-0.13003445	-0.43946314	0.11203289	-0.61863804	0.056937218	0.08923292	-0.09861374	-0.16670322
A_23_P385192	0.16653538	-0.11189556	0.4722891	0.06681061	-0.73469925	-0.14815712	-0.36160374	-0.3956251	0.5388622	-0.14262104	-0.60331535	-0.06681061	0.8771429	0.6754708	0.5739045	0.20049477
A_23_P94683	0.21301985	0.91391325	-0.21150827	0.39141798	1.8402276	0.3195796	-0.077539444	-0.56586933	0.5744462	-0.7069402	-0.29731798	-0.8872757	1.5305209	-0.22623014	-0.2363348	0.077539444
A_23_P155179	0.3647101	0.18241858	0.17051053	-0.4475596	0.49300742	-0.37720323	-0.23953176	0.75027347	0.25828052	-0.61143947	0.17027688	-0.5551717	0.1559856	-0.26913142	-0.46144462	-0.1559856
A_23_P74278	-0.5871277	0.8078003	0.17795086	-0.16015148	0.6178808	0.07796955	0.39614677	-0.36036015	-0.26020813	-0.7858505	0.14126492	-1.6453142	0.6505909	-0.8277874	0.28690147	-0.07796955
A_23_P46549	-9.6321106E-4	-0.271513	0.084542274	-0.1009779	-0.101257324	-0.33537865	-0.5558138	-0.5857601	0.7572923	-0.31764412	0.6341367	1.2712259	1.6605678	0.4791131	0.37653732	9.6321106E-4
A_23_P68714	0.25553894	-0.01342392	0.34237003	0.15507984	-0.684845	-0.08395958	-0.3064537	-0.3348875	-0.24917793	-0.06353855	-0.51343155	0.01342392	1.5010982	0.7281647	0.62518454	0.2494564
A_32_P1192	0.050169945	-0.2167654	0.1387062	-0.050169945	3.1634593	-0.29416275	-0.5183916	-0.5452709	-0.86798763	-0.27089214	0.38018322	-0.19382381	3.2293606	0.5158653	0.412611	1.3448963
A_24_P931250	0.08764982	1.2280278	0.33099127	0.97402525	-0.46791267	-0.30957556	-0.35491228	-0.0876503	-0.3777876	-1.1367607	-0.49240065	-1.1190543	1.3079896	1.6499267	0.7741232	0.687634
A_24_P324141	-0.38538718	1.0744927	0.8753369	0.3306687	-0.43823028	1.0001948	-0.5788162	-0.3782699	0.0786078	0.6236346	0.46186948	-1.0496967	0.7525332	-0.0786078	-0.47508645	-0.07892871
A_24_P944788	0.17568779	-0.086423874	0.26812887	0.07491779	4.7939615	-0.18242836	-0.41280937	-0.43426037	-0.73763657	-0.15187454	-0.59312344	-0.07491684	3.621368	0.6209259	0.5165186	0.13907623
A_24_P697573	0.021166086	0.1982305	0.18060517	0.44119716	-0.7164004	-0.021166086	-0.65033746	-0.31377244	-1.2907698	-1.1579144	-1.5698779	-1.0105798	0.98068166	1.313595	0.54939485	0.38976216
A_23_P256297	-0.14086962	-0.11547136	0.4530654	-0.37391043	-2.2737603	-0.026925564	0.06662607	0.43841124	0.026925564	0.05735445	0.2254796	0.115908146	-1.1750054	-0.16177034	-0.45437193	0.22446108
A_23_P388331	-0.04800129	-0.3059101	0.048000813	-0.14927387	-0.1052618	-0.4190216	-0.65611744	-0.67136	0.7439246	0.5573077	4.575582	1.7962093	0.56875515	0.37778473	0.27202988	-0.10607147
A_24_P925966	0.08334541	-0.1736393	0.18050957	-0.018260002	-0.9185219	-0.29207993	-0.5312624	-0.54434586	0.955842	-0.25300026	4.2779326	-0.17726707	0.6926584	0.50289154	0.39642477	0.018259048
A_24_P318319	0.8952403	0.022467136	0.14652777	0.6525216	-1.0430036	0.5567479	0.2857442	-0.22014284	-0.022467136	-0.05501604	0.14507627	-0.16025591	-0.70533943	-0.09267759	-0.14454126	0.09785795
A_24_P213187	0.09002209	-0.16513824	0.51333666	-0.01203537	-0.57608414	-0.29289532	-0.53676414	-0.5456867	0.29172087	-0.25030136	-0.6809721	0.031323433	1.6261597	1.4009657	1.0767517	0.012036324
A_23_P145584	-0.38665104	-0.47426414	-0.049606323	-0.5471506	-0.6856985	0.23835754	0.49747086	-0.08610344	0.15976238	0.13263607	0.3876028	-0.25224495	0.049606323	-0.40639782	0.100115776	0.19216824
A_23_P49862	0.17820168	-0.07569122	0.27982855	0.07569122	-0.8509712	-0.21182823	-0.46044922	-0.46539974	1.38588	-0.16593266	-0.33315086	-0.0925684	1.3488255	0.575469	0.6558218	0.08805084
A_23_P7961	0.15202665	-0.082396984	0.4409194	0.3640237	-1.1384168	-0.363801	-0.6956172	-0.27170897	-1.0503793	-1.4651318	0.08239651	-0.3635664	0.5564976	1.0724921	0.12090492	0.5550246
A_23_P71591	0.17541695	0.044901848	0.29238224	0.19529343	-0.010297775	-0.048739433	-0.092059135	0.010297775	-0.06792927	-0.16572571	0.59773064	0.020938873	-0.23884869	-0.33356285	0.39125347	-0.15389156
A_23_P404606	0.05796361	-1.7421277	0.7932074	0.29221797	1.8615191	-0.05796361	-0.38793206	-0.26858878	0.21974397	-0.47047448	0.060076952	-0.30103326	1.368377	-1.5518057	-0.20929122	0.12707353
A_23_P131534	-0.15513277	-0.32288504	0.2821269	0.061280727	0.35878897	0.10627985	-0.2694702	0.33229733	0.0254426	-0.73825455	-0.19411945	-0.6625123	1.3371968	0.68647766	-0.13066435	-0.0254426
A_23_P27035	-0.2329917	0.19308043	0.0025792122	0.05289793	0.44680738	-0.31360197	-0.29958963	-0.11029005	-0.30080843	0.3093896	-0.020057201	0.38432074	1.1234975	0.3090129	-0.3011794	-0.0025792122
A_23_P25019	0.16108227	-0.009609222	-0.41159534	-0.118237495	-5.0938973	-0.022449493	0.10705757	0.20318413	0.1797781	0.009609222	0.05080223	0.41495895	-4.9954014	-0.011386871	-0.03626156	0.087041855
A_24_P16361	-0.4095633	0.24622035	0.40255857	-0.058312178	-0.75604177	0.39074016	0.058312178	-0.067254305	0.2918985	-0.8271277	-1.152036	-0.53599906	0.2782185	-0.58754945	0.8609493	0.26503778
A_24_P294931	0.19651365	0.47448206	-0.44945097	0.33352995	-0.38338232	0.23433352	0.14662027	-0.13884306	0.51229715	0.008669376	-0.36061144	-0.63422155	-0.5876069	-0.008669376	0.31707907	-0.11880541
A_24_P935864	0.06123638	-0.197402	0.1735096	-0.045285225	-1.0081081	-0.34883785	-0.6189089	0.72493744	0.045285225	-0.29168987	1.0591307	-0.22818851	0.59221554	0.7415352	0.30364323	-0.06706715
A_24_P177948	0.022894382	1.430089	0.9177537	-0.8518901	2.418995	0.17120028	-0.022894382	-1.3283505	0.9770827	-1.097405	-0.5793972	-1.0353246	3.2971087	-0.3819976	0.5774226	-0.8751092
A_23_P319520	-0.1822114	0.29520226	0.7901335	0.63094187	-0.14354563	0.0628438	-0.6812644	-0.3257022	-0.73985386	-0.71317816	0.010525227	-1.0896001	1.4318476	0.99780273	0.15835285	-0.010525227
A_23_P113184	-0.40819788	0.50722075	-0.20617056	-0.3142953	0.9275708	0.03339815	-0.23065615	-0.19968271	0.43028593	0.040341854	-0.35079336	-0.03339815	0.7567353	0.044499874	-0.40874434	0.15550947
A_23_P333552	-0.010643959	0.23741817	0.25509834	0.15672922	0.010643959	-0.23992491	-0.45541	-0.40549946	0.44364262	-0.23145628	-0.19504166	-0.046780586	0.4918599	0.7048197	-0.26523304	0.20958376
A_23_P14853	-1.2054234	0.46331787	0.5119934	0.25766993	1.7496347	0.15556812	-1.0366964	-0.6264863	0.22016287	-1.5720468	-0.46705723	-1.9887977	2.3497257	0.0106425285	-0.37987995	-0.010643005
A_23_P161706	0.19756365	-0.7446084	-0.18335772	0.3735509	-3.264659	0.13781404	0.13816786	0.23959112	-0.19088793	-0.028473377	-0.07559824	0.21900225	-3.691896	-0.14073706	0.53110266	0.028473377
A_24_P930237	0.28604984	0.006731987	0.41043806	0.17209339	-0.7808571	-0.123298645	-0.40602207	-0.4182253	-0.58651924	-0.059041977	-0.50799656	-0.0067329407	0.79875565	0.6479535	0.50777054	0.15231419
A_23_P354288	-0.17244053	0.5216799	1.1407099	0.5210867	-0.2334466	0.38202095	-0.3360262	-0.5248666	-0.79564285	-1.0292239	-0.053931236	-0.8127117	1.2258115	1.1859412	0.053931236	0.34464407
A_23_P427502	-0.30742788	1.0561929	-0.029855251	-0.041501522	-1.0397754	0.31262636	0.064181805	-0.36439562	0.89195967	-0.15331411	-0.38907385	0.4715867	-1.5762134	0.05049181	0.029855251	0.4000249
A_23_P20676	0.2838273	0.022675037	0.0712657	0.2717166	-0.99744654	-0.11050749	-0.0021481514	0.0021481514	-0.2934823	-0.28268862	0.28799868	-0.06320429	-1.0251775	-0.13655901	0.7479682	0.31314325
A_32_P150928	1.275692	0.30231762	0.52493286	1.2826633	-0.41071892	-3.8194904	-2.6790237	-0.22253609	-1.9314604	-0.9678993	1.1270208	0.22253609	-1.0880642	1.1237335	-4.3187428	0.37390518
A_23_P312358	-0.46306944	-0.41843796	0.06610823	0.69806147	-1.4873381	-0.0060448647	0.116001606	-0.26149702	0.029912472	0.3700738	0.09355116	0.0060448647	-0.9953017	-0.19678068	-0.31267214	0.34803057
A_32_P20523	-0.33430052	-0.39053202	-0.12985182	-0.1390605	0.32842684	0.036684513	0.07122946	-1.1920929E-5	0.14412165	0.21149588	1.1920929E-5	-0.006456852	1.2223592	-0.18855143	-0.49885893	0.31571913
A_24_P77364	0.088974	-0.2873497	0.48448372	-0.23369312	-1.83216	-0.4378271	-0.07840347	0.119939804	-0.250535	0.35952187	0.47702312	0.54251003	-0.40067768	0.07840347	-0.7477741	0.28606415
A_23_P200252	0.0076355934	0.17777109	-0.50466204	-0.14000082	-0.7231374	-0.3719468	-0.025713444	0.23619318	-0.09739447	0.44192648	0.7533803	1.0645642	-0.48699522	0.58691835	-0.0076355934	0.23801279
A_32_P233911	-0.6153312	-1.0330052	-0.6408086	1.2236857	0.06077814	-0.7392125	-1.0044093	0.016703129	0.37701654	0.23146725	-1.4632287	-0.95206404	0.15083265	-0.016703129	1.0631862	0.083482265
A_24_P831005	-0.57001996	-0.45939183	0.7276752	-0.018280268	1.4765351	0.313246	-1.0288241	-0.645437	-1.3787568	-0.20228982	0.21533895	1.154177	1.9218729	0.9962499	-0.29541755	0.018280268
A_23_P22473	0.49902344	0.37006664	-0.23268986	0.36084938	0.6380472	-0.008749962	0.2480917	0.13693428	-0.07015419	-0.19537735	-0.028318405	-0.77567863	0.31271744	-1.7166138E-4	-0.23834133	1.7166138E-4
A_23_P110386	-0.05300951	0.63285255	0.952425	1.6381931	-0.26846695	-0.3186865	-0.95332813	0.74385357	-0.2869997	-0.96178913	-1.396512	-0.8770933	0.22715664	0.053009987	0.86635685	1.0095625
A_23_P99320	0.26727438	0.35778952	-0.27042246	0.35537004	-2.3318467	0.12414122	0.33558226	-0.12118578	-0.25216436	-0.020128727	0.49762774	-0.24160624	-1.7685933	-0.051017284	0.43552256	0.020128727
A_32_P64558	-0.06929779	-0.41866493	-0.04344082	1.3092122	-0.83115387	0.043439865	-0.43015003	1.3010483	0.05657959	-0.41802502	-0.8629551	-0.33808994	1.083108	7.0106325	0.80435276	0.1380887
A_24_P83922	1.0222313	0.5537379	0.124322176	0.75496364	-0.63135695	-0.95217633	-0.4559281	-0.47838712	-0.2828338	-0.2312262	0.38918662	0.57293534	-0.124322176	1.0826671	-0.3543303	1.0596192
A_23_P89192	0.16036701	-0.18016815	0.18873882	0.010273933	-0.6056442	-0.010273933	-0.21418	-0.22208309	1.0876408	-0.17343712	-0.6308899	-0.099012375	0.99721336	0.81343174	0.7238045	0.3617897
A_23_P215341	-0.053433895	0.15558577	-0.47336054	-0.026174068	1.7756143	0.030043125	0.36363363	0.27594995	-0.36905718	-0.06928015	0.026174068	-0.3171754	1.6675735	-0.35383368	0.939507	-0.41015577
A_24_P324520	-0.44680166	0.46550465	0.2217269	-0.4976549	-0.09004784	0.14811754	0.09451771	0.5047188	0.09004736	0.13919401	-0.4667697	-0.2642703	-0.82573414	-0.614316	0.5113988	-0.56659603
A_23_P127760	0.4423542	1.0812855	0.4741459	1.0370231	-1.4406328	-1.5200806	-0.4423542	-1.6890898	-2.2715015	-1.6116819	-2.0785685	-1.5407705	2.8328676	1.8148427	1.5007768	1.0104156
A_23_P151506	0.104465246	0.13177419	0.5021312	0.1129086	0.9362881	-0.043212175	0.024248362	-0.9061415	-0.17487788	-0.029984236	-0.024248362	-0.3721454	2.204759	-0.33073163	0.23761821	-0.6447003
A_32_P22263	-0.19452715	-0.19226885	0.07375288	-0.44643354	-2.0139794	0.10245752	0.30067396	0.066310406	-0.25096178	0.12223387	-0.09059	0.2672906	-1.2958531	0.13938665	0.38997602	-0.066310406
A_23_P37778	0.5818095	0.40557623	-0.16548967	0.3172269	0.12016249	-0.07003832	0.007984638	0.23029852	-0.11268091	-0.15655947	0.41913176	-0.028722286	-0.1972003	-0.007984638	0.083796024	-0.31011438
A_32_P50522	-0.08399153	0.5224414	-1.111053	-0.3415866	1.7113404	0.21650171	0.22142363	-0.37932253	0.08399153	-0.6922574	-0.23015642	0.08859396	0.6531043	-0.36714315	0.14110518	-0.527493
A_24_P313822	0.3350482	-0.07092905	0.13430834	0.39070654	-0.24339819	0.13668966	0.31571627	-0.032869816	0.195827	-0.7385936	-0.39411974	-0.79208326	-0.15195036	0.6624279	-0.15402222	0.032869816
A_23_P48637	-0.8155689	0.8442402	-0.765831	-0.72603226	1.716795	0.4976387	0.7116995	0.04984665	0.45477867	-0.12195587	-0.5014963	-0.330822	0.8890877	-0.5081129	-0.04984665	0.12901878
A_24_P363679	0.2621169	0.5336461	-0.579957	0.27412653	1.1833482	0.09653711	0.16032934	-0.30013227	-0.09653711	-0.6222768	-0.46299696	-0.17545176	1.0713611	-0.2269435	0.55087423	-0.3604684
A_32_P106553	0.812263	0.16478968	0.040751934	0.6632018	-2.1135163	-0.18139029	-0.08976698	-0.1421771	-0.31849146	-0.040751934	0.40863752	0.26040602	-1.5649657	0.12811136	0.04584551	-0.08746576
A_24_P801197	-0.9560411	-0.28321147	0.30626988	-0.11294913	2.8898404	0.57960916	0.4189837	-0.15689063	0.026010752	0.27069688	-0.06392741	-0.64853644	3.5797026	-0.026010752	-0.22878957	0.029016733
A_23_P204941	-0.33500528	0.53346777	-0.15220737	-1.1576414	-0.2772236	1.0248785	1.0324097	-1.5162725	0.12307215	-0.12307167	0.41471958	0.23509073	-0.24548149	-0.44544888	0.79356766	0.37369442
A_32_P109922	0.053061485	-0.34596252	0.48251057	-0.14053726	-0.83377934	0.08035469	-0.053061485	-0.1431694	0.305892	0.41755962	-0.07589245	-0.28581524	0.28104687	-0.118141174	0.16695309	0.11284065
A_24_P32118	-0.019774914	-0.107599735	0.019774914	-0.1450057	0.070400715	0.74987936	0.37998056	0.26152372	0.9127135	0.2885642	-0.16484785	-0.14016008	-0.14977121	-0.16616678	-0.24945688	0.40700483
A_24_P376029	-0.48251104	-0.7846837	-0.42610884	-0.5852246	-0.78408384	1.2739329	0.61145926	-0.7001834	-0.10573816	0.32103968	0.19135618	-0.7106137	0.30719948	0.10573816	1.8180747	0.7010598
A_23_P25086	0.26172972	0.34588194	-0.011502266	0.45261145	-0.7257099	0.052034378	-0.73007965	-0.41297817	-0.97978306	0.011501789	-1.0286732	-0.5666828	0.1410389	0.59853697	0.48988724	-0.29809284
A_23_P83953	-0.15796709	0.44591188	0.15005636	0.01799059	0.97245646	0.2539277	-0.09155512	-0.022064686	0.11735678	-0.54178286	-0.25571108	-0.37145472	0.8338895	-0.01799059	0.1503663	-0.1336608
A_23_P162378	0.25444794	-0.20104027	1.0911121	0.042710304	-1.1622887	-0.042710304	-0.45558453	-0.44462585	-0.19695377	0.05280304	0.29768753	0.08162022	-1.2528629	-0.14835358	0.21565628	0.2522831
A_23_P319970	0.05803728	0.22977018	-0.7899556	-0.1414752	4.8971176E-4	-0.91949224	-0.60533285	-0.030829906	-0.3015437	-4.8971176E-4	0.31231165	0.8888993	0.14021349	0.6158099	-0.7931657	0.39477587
A_23_P55251	-0.033350945	0.59953547	-0.3163786	0.351727	3.526279	0.033350945	-0.23530054	-0.2056427	0.2979741	-0.30760908	-0.42998934	-0.2341137	3.139028	0.12997913	0.61792326	-0.32906103
A_23_P40174	0.0018687248	-0.27541494	0.42087507	-0.12510157	-4.5296245	-0.0018687248	-0.1505723	-0.23497057	0.036646366	0.043422222	-0.1148715	0.3288989	-3.184143	0.5058389	0.510551	0.050973415
A_24_P652033	0.019415379	-0.67411184	1.1124167	-0.6659994	-0.7719631	-0.11072016	-0.34330034	1.163302	0.22600126	0.82953405	-0.019415379	0.24653673	-0.7312398	0.115698814	-0.25239038	0.1714716
A_24_P911746	0.25646973	-0.026575089	0.33018494	0.15809536	-0.6259537	-0.045218468	-0.25526333	-0.29020596	-0.6762924	-0.047207832	-0.51421356	0.026574135	0.9862542	0.7835603	0.6825609	0.3100624
A_23_P2960	0.29254317	-0.103649855	-1.0010121	0.53212714	2.0759327	0.3563063	0.2948916	-0.20383	0.24244046	-0.59620833	-0.6568849	-1.1489022	1.5335581	-0.33692765	0.103649855	-0.62437844
A_23_P2831	-0.9312086	-0.85076714	-0.089668274	-0.70560455	-11.061589	0.572155	0.43207836	-0.21579933	0.6400175	0.0432415	0.37177086	0.110780716	-9.373472	0.18982697	-0.0432415	0.41998768
A_24_P234871	-0.5168371	-0.8214102	0.49237537	-0.32123566	1.4016495	0.016255379	0.06153679	-0.4192505	-0.016255379	1.0294285	-0.8246908	1.0198793	2.1117754	0.1546011	-0.34667873	-0.5826225
A_23_P134714	0.13079071	-0.23235226	-0.2919979	-0.6697016	-1.5093813	0.36932087	0.5429888	0.35063362	0.021642685	0.48529625	0.46287727	0.5710697	-1.3797331	-0.19695282	-0.021642685	-0.41940022
A_23_P133174	-0.3072443	0.028198242	-0.07186127	-0.37189674	0.7817335	0.2051878	0.1608553	-0.263278	-0.03279209	-0.35123825	0.13045597	0.24502945	1.056366	-0.14699173	-0.028198242	0.120827675
A_24_P838261	0.25452805	-0.016392708	0.33823967	0.15616417	-0.67351246	-0.07667446	-0.29699898	-0.3270054	-0.66762733	-0.05935669	-0.51398087	0.016392708	0.9382658	0.738399	0.63576984	0.26049995
A_23_P200838	-0.33696985	0.37970257	0.30164433	0.21379185	0.29225922	-0.21715593	-0.81557846	-0.16535664	-0.79245615	-0.74816275	-0.45783854	0.63996315	0.7017083	0.71529484	0.02636385	-0.02636385
AT_T_3	0.12048817	0.0659399	0.18674278	0.0570879	-0.7468691	-0.0570879	-0.3641777	-0.37156105	-0.6680536	-0.14616394	-0.62838554	-0.11483765	0.85276175	0.7135124	0.5413594	0.1850586
A_23_P201047	-0.10936403	-0.5561452	-0.27926397	-0.24910402	3.7455535	-0.03695631	-0.15827894	0.3823104	0.05801153	0.21383333	-0.27329302	0.20785093	2.853086	0.5527339	-0.5371814	0.03695631
A_23_P24275	-0.3571508	-0.65582347	0.68291736	-0.13203883	-0.96218944	0.1557219	-0.15963149	0.37488627	-0.9624479	-0.3336804	0.13203883	0.2767284	0.37521958	0.6136415	0.28054738	-0.58623195
A_32_P122595	0.17393398	-0.08841705	0.26437902	0.0746479	1.7657266	-0.18105221	-0.41121674	-0.43312836	-0.7404442	-0.15073013	-0.59445953	-0.07464886	0.8181734	0.62277937	0.51845646	0.20419693
A_24_P928333	1.5731068	-0.4782853	-0.30354357	-0.4948163	-0.1784296	0.8108835	0.348495	0.057882786	0.24388266	-0.697001	-1.1639094	-0.23246431	1.8777828	0.6123438	-0.057882786	0.14991426
A_32_P153195	-0.42828655	-1.4039259	-0.17073488	-0.108039856	-2.4248028	0.74383974	0.086048126	0.33013582	0.6495123	0.12176609	-0.73868513	0.42892504	-0.5410204	0.24534607	-0.086048126	0.53953934
A_23_P215634	-0.08799505	0.32519102	-0.8154998	-0.4770646	6.1292634	0.5736575	0.45754957	-0.39997053	0.57343626	0.17476702	-0.10749674	-1.2413926	5.077458	-0.9015136	-0.27032614	0.08799505
A_24_P298723	-0.2061944	-0.46314	-0.11076689	-0.30624914	0.41600466	0.26828814	-0.8172345	-0.83115244	0.18709326	-0.5394149	3.58953	-0.46446848	1.7865987	0.2167306	0.11076689	1.2311139
A_23_P66948	0.021675587	-0.73596716	0.31304884	0.42101622	-4.0773687	-0.676991	-0.41789198	-0.18159819	-0.021675587	0.09882307	0.31016016	0.72126913	-4.3293543	-0.08826876	0.8128867	0.05514002
A_23_P82026	-0.36301327	0.59736633	0.0472188	0.71810246	-1.2850041	0.08726978	-0.22897005	-0.032149315	-0.33125114	-0.38867617	-1.4849782	1.1261392	0.032149315	1.0886741	-0.06321144	0.036159992
A_32_P13370	0.069942474	-0.069942	0.4825759	0.9677501	1.7643518	-0.42371225	-1.1463308	-0.33518696	0.31841803	-0.13489914	-0.9993477	0.41763306	1.7930918	0.20288134	-0.6470313	-0.16142654
A_24_P306304	-0.049918175	-0.30357456	0.049918175	-0.1509304	-1.0756636	0.36916733	-0.6853628	0.55538654	0.86445475	0.06379986	-0.69911385	-0.31834126	1.5703449	0.3503394	0.71701527	-0.1367178
A_23_P216549	-0.005273819	-0.12646866	0.22112656	0.26015568	2.8590803	-0.12239647	-0.53512573	0.005273819	-0.20408249	0.20296955	-0.12588978	-0.16769314	2.9724932	0.7865906	0.01748991	-0.115924835
A_24_P188085	0.07798958	-0.35530424	0.41289043	0.061461926	0.91405296	-0.0404644	-0.022017002	0.68971205	0.545414	-2.3213654	0.022017002	-0.59069204	-0.23418999	-2.0446239	1.148613	-0.26501274
A_24_P208045	-0.083331585	-0.029443264	-0.34232092	0.124768734	0.6843457	0.2603097	-0.033894062	-0.3191123	-0.031231403	0.0072932243	0.010032177	0.63401175	0.7992358	-0.0072932243	0.014392376	-0.04096937
A_23_P62128	-0.21934271	0.49883604	-0.23998976	-0.2813449	0.2146287	-0.018555164	0.018555164	-0.11547136	0.42098188	-0.044207096	-0.30449247	0.24912214	0.18870878	-0.10141039	0.11223745	0.28309965
A_24_P482124	-0.018185139	0.2666402	0.85890007	0.6055498	-0.42568827	0.020246983	-1.6943398	-0.5558529	-0.961874	-1.064156	0.018185616	-0.48850298	1.3025136	1.5171671	-0.19628668	0.45286655
A_23_P124570	-0.33205485	-0.118863344	-0.2642753	-0.2204721	0.6864116	0.46621585	0.6102083	0.22231507	0.03586173	-0.4616711	0.70667243	-0.03586173	0.11875987	-0.48715663	-0.079283476	0.087715864
A_24_P848662	1.9360819	0.47482014	0.26755428	1.5169458	-0.13068295	-0.20891476	-0.839941	-0.2970276	-0.3723898	0.13068295	0.42435837	-0.53878975	0.76995945	0.18973827	-0.1726284	-0.44470787
A_23_P107087	0.20101166	1.2385855	-0.2555542	-0.104011536	-0.9713001	0.83024883	1.1431189	-0.060424805	0.65445995	0.48897648	0.5093622	-0.26517773	-2.0621243	-0.45891857	0.060424805	-0.36776257
A_23_P334045	0.23625469	0.99222374	0.21571445	0.39727783	-2.5936337	-0.18323612	0.27943325	-0.70345306	-0.6928625	0.08996868	-0.08996868	-0.3424034	-1.4659085	0.16557789	0.6132879	-0.6799383
A_23_P321349	-0.24802923	-0.46404028	0.27697515	-0.14134645	-3.2535605	-0.03407049	0.021099567	-0.0136322975	-0.27976084	0.5841527	0.44029188	0.4773698	-1.979075	0.3243928	0.029746532	0.0136322975
A_23_P79562	-0.90646553	-1.2861328	0.42016792	-0.88452625	-3.6399975	-0.21639347	-0.51566505	0.21639395	0.515399	0.48457575	-0.507813	0.9636569	0.8204746	0.42060852	0.24973202	-0.55503607
A_23_P393697	-0.1166296	0.090740204	0.5879803	0.22425556	-0.64301586	0.17036057	-0.09920883	-0.04925728	0.36244678	0.07425022	-0.15733624	0.04925728	-0.7817383	-0.055519104	0.27935123	-0.39950657
A_32_P105465	-0.37863398	-0.010799885	0.2726345	0.03467655	-1.8106809	0.61016846	0.031888485	0.30867767	0.24470615	-0.56443596	-0.20465136	-0.09665203	-1.2116508	0.014012814	-0.03875208	0.010799885
A_23_P202837	-0.49438572	-0.187047	-0.45033073	0.31417847	0.95211697	0.491395	0.77376175	-0.06263065	0.06263065	-0.32585716	-0.5420275	-0.4267788	0.57257366	-0.71050835	0.22408581	0.45855713
A_24_P7565	0.17167234	-0.15935946	-0.38237095	-0.96537685	0.33244944	0.1663394	-0.19552946	0.15935898	-0.62332773	-1.6419497	-0.8868561	-1.3460264	0.23672915	0.21354008	0.9207916	0.3502593
A_23_P103522	0.284441	0.0074005127	0.40620708	0.17213821	-0.7842274	-0.12421417	-0.40695953	-0.41681385	-0.58969784	-0.0595541	-0.50817776	-0.0074014664	0.79881	0.6458454	0.5073962	1.1304636
A_24_P58177	-0.43903494	0.3360939	0.20851278	0.17796087	0.12214661	-0.29193974	-0.5850005	-0.28835917	-0.12214661	-0.5258417	0.12943792	-0.2619815	0.7210088	0.47170067	-0.406538	0.25758982
A_24_P179363	0.2364111	0.5819044	0.094101906	-0.28225422	-1.1421218	-0.067353725	0.067353725	0.14597082	0.099823475	-0.40751457	0.66310453	-0.23846245	-1.2400246	-0.5094633	-0.5305228	0.17897224
A_23_P60479	-0.12750673	0.102180004	-0.2827506	-0.28114843	-1.3988833	0.17646074	0.24606562	-0.10990286	-0.027741909	0.20697927	0.1459508	0.027741909	-0.58729696	0.07452631	-0.046503544	0.050034046
A_32_P108636	-0.3017559	-0.038707256	-0.6028309	0.0557909	1.8194399	0.038707733	0.17323017	0.3598466	0.5224066	-1.5488443	-0.35239077	-1.5039301	0.900197	0.2665944	-0.99984455	-0.91927814
A_32_P230192	-0.2027874	-0.50597	-0.068244934	-0.32475758	2.6024218	1.0696545	-0.8880472	-0.0141124725	0.9250946	-0.53032875	-0.43555832	0.7572737	0.69118595	0.57119703	0.0141124725	0.24375057
A_24_P158089	-0.46339178	0.67068243	0.11896229	0.7708912	6.444606	0.7110038	-0.034754276	-1.2557516	-0.84151125	-1.126873	-0.58188534	-1.6797838	6.072028	0.0347538	0.2801547	-0.060314655
A_32_P184367	0.03877592	0.041227818	-0.17471361	-0.19605684	0.28398085	-0.07578039	-0.047531605	0.19267416	-0.23291826	-0.16193056	-0.03877592	0.33897543	0.38947248	0.31865835	-0.04151392	0.17164183
A_23_P64510	0.029953241	0.34879947	0.38123965	0.46448207	-4.8584013	0.59345365	0.3654139	0.47132134	0.52313256	-0.68926644	-0.029953241	-1.678654	-3.5052059	-0.9570744	-0.030021429	-0.48314166
A_24_P210569	0.22282505	0.72554207	-0.34403706	-0.064870834	-6.0380363	0.60159874	0.84702396	-0.017320633	0.29216862	0.017320633	0.31691647	-0.57248783	-5.087557	-0.40006065	0.450737	-0.2554016
A_23_P76610	-0.09868193	-0.45408678	-0.04648924	-0.40718794	-0.07529688	0.34773397	-0.043861866	-0.085758686	0.18674326	0.32172346	0.5228677	0.71341467	0.043861866	0.08176851	-0.50358725	0.24015665
A_24_P316296	-0.02554512	-0.3886261	-9.794235E-4	0.91262627	-0.78320885	-0.27397537	-0.36647606	0.2321825	-1.0282516	0.48906374	9.794235E-4	-0.3080206	0.7946496	0.62612534	0.5404854	0.18319273
A_23_P392544	0.21574354	0.99489594	0.38273048	0.59621286	-0.5413556	-0.1852045	-1.0008583	0.04553604	-0.0017299652	-0.74091053	-1.0023222	-1.0152502	-0.03778076	0.32704687	0.9388652	0.0017294884
A_24_P213284	0.18095207	0.576005	0.008275986	0.42765808	-1.3809834	-0.4095745	-0.35586834	-0.26073742	0.063427925	-0.11174965	0.12432957	0.018239975	-1.5259905	0.2700882	-0.38011742	-0.008275986
A_24_P384867	0.25489616	-0.09771538	0.27941322	0.07722759	-0.5045786	0.017490387	-0.09960461	-0.10730934	-0.74234486	-0.10054779	-0.5389557	-0.017489433	1.0855331	0.91055346	0.8230295	0.46347332
A_23_P112162	0.15807962	0.060919285	-0.35390615	0.12627268	1.0710864	-0.25463247	-0.20461702	0.107010365	0.113452435	-0.17883062	-0.060919285	-0.06550741	0.6918397	0.21738291	-0.5709748	-0.14393187
A_23_P59807	-0.011161804	-0.3576193	0.0142354965	1.2828021	7.529516	-0.24393559	-0.3747902	0.011161804	-1.0044928	-0.35556698	-0.8037176	-0.2771511	7.317135	7.918041	0.5558176	0.1950798
A_23_P168306	-0.14419174	-0.8014145	-0.73488045	-0.6794052	-0.9189005	0.3409996	0.37500668	0.14419174	0.25306988	0.36335182	0.26074886	0.6649437	-1.1568899	-0.2702036	0.46576118	-0.9549036
A_32_P98975	0.18504572	-0.40601444	-0.31531906	-0.19705868	1.0207181	-0.22376204	-0.01043272	0.17019033	-0.22803354	0.039538383	0.01043272	0.47361803	1.3023744	0.065322876	-0.13749552	-0.09304571
A_24_P386419	0.6188016	0.036367893	0.5285268	0.07252073	-1.6024504	0.10382986	-0.08842325	0.045558453	0.016156673	-0.016156673	0.21904802	-0.940454	-0.66695166	-0.4351678	-0.16798687	-0.3447957
A_23_P101342	0.58216524	-0.39281607	-0.32996225	0.1353097	-0.61366606	-0.1353097	0.49641085	0.53230333	-0.29196882	0.19135523	0.31401587	0.1884408	-1.1285343	0.15126467	-0.5863719	-0.2088399
A_24_P314451	-0.235147	0.45006084	0.22044468	0.5677581	0.80932665	-0.2204442	-0.82766056	-0.48666096	-0.5378771	-0.5581894	-1.5972781	-1.0908146	1.3159919	1.0076103	0.3105774	0.29199934
A_24_P703614	-0.47227955	-0.5878973	-0.317976	-0.7132149	-0.017791748	0.017791748	0.20743084	0.17892647	-0.41688538	0.19499207	0.06533432	0.061032295	0.33286667	-0.18116188	-0.18004608	0.20050812
(+)E1A_r60_n9	-0.33042526	-0.7617855	0.0671196	-0.2883873	0.50844383	-0.35975838	-0.0671196	0.17876244	0.28897285	0.76636314	1.078084	1.302805	0.07776451	-0.4305992	-0.8529701	-0.74527645
A_23_P339818	0.020574093	-0.2638669	0.7139764	0.2625165	3.3723083	-0.27118444	-0.92562723	-0.91018724	-0.6953378	1.0422502	-1.0372157	0.6730218	3.8944678	0.2046256	-0.020574093	-0.9638095
A_23_P215505	0.49174595	0.07916546	3.0968127	0.63499594	-3.2343163	-0.07916546	-0.37062597	-0.78130627	0.21639729	-0.08128452	0.5744319	1.2993612	-1.622127	-0.23786592	-0.6519246	1.0308418
A_23_P208119	-0.72939825	0.81705	-0.42260838	-1.117414	2.913639	1.0187163	0.29058456	-0.6418805	0.57119083	-0.65886354	-0.7013502	-0.29058456	2.760921	-0.38238	0.8636012	0.42565584
A_23_P31798	-0.3972001	0.16019773	-0.03232813	-0.4066062	-2.1018767	0.41603088	0.89888525	-0.1368599	0.27749634	-0.3913207	0.3654437	-0.51218605	-0.8320079	0.03232813	0.33633947	0.60753393
A_24_P932981	-0.16688061	-0.70469	0.12556791	-2.3938808	1.6412668	0.6959801	0.5307317	0.6864896	0.104374886	-0.0012192726	0.0012192726	-0.041007042	1.8505745	-1.2752595	-0.08424139	-0.7318249
A_23_P42397	0.4166479	0.9274845	-0.107049465	0.5641775	0.24279451	-0.18843031	-0.14270306	-0.9598098	0.07906389	0.10702944	-0.2312007	0.6966014	-0.34974766	0.614728	-0.07906389	-0.45027637
A_24_P944741	1.1266451	-0.2706356	0.08652115	-0.06766987	-0.7740536	-0.21478558	0.8786526	-0.20507431	-0.21488476	0.06766987	-0.7422161	-0.19335938	0.8394723	0.6391673	0.6336975	0.17430401
A_24_P917123	-0.02059269	-0.19808197	0.53985786	-0.27847576	-1.3900604	0.08116341	0.26303864	0.9947758	0.02059269	-0.36979485	0.5359106	-1.0538969	-1.6652398	-0.76048183	0.3755455	0.24986458
A_23_P255523	0.70509624	0.4861288	-0.33467484	0.7770214	-0.2546072	-0.5382347	-0.10544968	-0.09680462	-0.12310028	-0.0045719147	0.42180252	0.17176151	-0.8746376	0.3462906	0.0045719147	0.023558617
A_24_P262543	0.031486988	-0.109891415	0.27578878	0.04663515	1.7379012	-0.11909628	-0.16604948	0.25766802	0.057475567	-0.21761465	-0.031486988	-0.22923899	1.54736	0.073497295	-0.12707472	-0.054487705
A_32_P11425	1.6277251	-0.10802412	0.8425956	0.69576025	0.10802412	-1.1974196	-1.8653884	-0.47290277	-0.8417373	-0.5016341	1.3317552	-0.5953622	0.7115483	1.070045	-1.2856879	0.13053751
A_24_P749042	0.706861	0.046325207	-0.283278	0.9404597	-0.74833727	0.046514034	0.059114933	-0.031535625	-0.24926233	-0.09685564	-0.41018343	-0.57332563	-0.59290075	0.4598136	0.7491927	0.031535625
A_23_P317729	-0.21344042	-0.4612422	-0.15097189	-0.31170797	-1.0579743	-0.050465107	0.050465107	-0.39315844	0.70772266	0.7771683	1.4963927	-0.43971586	0.55521345	0.35244322	0.25238132	0.8430543
A_23_P20722	0.4304428	-0.02264309	0.9814081	0.1642189	-2.036829	-0.24853992	-0.3080721	0.0721674	-0.21767902	0.14592743	0.2093544	-0.049661636	-0.95928097	0.02264309	0.035121918	-0.112877846
A_24_P237778	0.070156574	-0.7380848	-0.6436672	-0.070156574	1.2873268	0.86827993	0.87487507	0.5321202	0.72647333	0.37483025	-0.6161518	-0.6652317	0.2761035	-0.9946046	-0.45692348	-0.452991
A_32_P91546	-0.07927084	0.84045076	0.007575035	-0.007575035	-6.1646533	1.0380759	0.81244326	0.31046438	1.2262044	-0.40592623	1.0740924	-0.9263344	-2.2709537	-0.17973566	-0.20508337	0.87990904
A_32_P71551	1.8572016	0.02968216	0.49220848	1.2860785	-0.12367916	-2.3621626	-2.4916582	-0.02968216	-1.170022	-0.84165287	1.9122486	0.1517868	-1.2609158	1.3525152	-2.6438055	0.7247553
A_24_P332981	0.15688992	-0.14967108	0.111717224	-0.21809292	-1.7216978	0.6540575	0.49643707	0.19044876	0.39770937	-0.28376484	-0.41069603	-0.93309593	-1.6048508	-0.009423256	0.34063625	0.009423733
A_23_P97826	-0.76168823	-0.80542755	1.0545197	-0.8581629	-0.08376455	0.52767086	0.40433788	-0.30857182	0.16778517	-1.0640669	0.068297386	-0.99088955	0.6270647	1.7396698	1.0608511	-0.068297386
A_23_P165921	-0.033396244	0.06877518	0.72254276	0.096148014	-2.4291239	0.033396244	-0.46810484	-0.21098566	-0.6035805	-0.8628516	-0.25175428	-1.0235524	0.31305504	0.80820704	0.5850334	0.5064459
A_24_P204011	-0.15064192	0.79273653	1.8145823	0.07589388	-2.2606697	1.1009994	0.9151087	-1.1489544	-0.20482397	0.7896886	-0.26093483	-1.3367462	-0.20924187	0.43442154	-0.0758934	0.6206794
A_32_P97305	-0.24462986	0.33941412	0.5997391	0.46178007	-0.13847208	0.13847256	-1.0222416	-0.4807434	-0.83385897	-0.74224806	-0.8370819	-2.0159388	1.1889105	1.149117	0.87648964	0.47196865
A_24_P341106	0.86216164	-0.30622578	0.32161808	0.19318771	-3.2063236	0.14848137	0.27792263	0.015122414	-0.20810413	-0.11648655	0.20120049	-0.015122414	-3.170156	-0.07265186	0.31727886	-0.06305504
A_32_P182882	0.054599285	-0.27085638	0.26197004	-0.006758213	-0.34981012	-0.18673086	-0.069386005	0.24974394	-0.42957735	0.18114233	0.006758213	0.4626708	0.010758877	0.29815245	-0.020327091	-0.011452198
A_23_P110655	0.25364637	-0.082098484	0.6428952	0.52222395	0.5032134	-0.770803	-0.9998975	0.5465789	-1.3223033	-1.3445086	-0.015285969	-1.132134	0.024083614	-0.17503977	0.30958414	0.015285969
A_23_P353726	0.30268383	0.33442116	0.07996464	0.27089214	-0.5167761	0.33502865	0.31263447	-0.42947102	-0.035190582	-0.4218955	0.6316786	0.035190582	-0.95536995	-1.0713654	-1.1596193	-0.09898043
A_24_P185421	0.0103161335	0.067344904	0.40894294	0.18966126	-0.0103161335	-0.0855639	-0.33636832	-0.24242187	-0.44827247	-0.9049666	-0.92753625	-1.0075123	0.6454451	0.76578736	0.492975	0.2047894
A_24_P225518	0.19306183	0.37220526	0.62724733	0.84619474	0.7537966	-0.40250063	-0.94096327	-0.23939514	-0.6440182	-1.7736201	-0.8069444	-1.4976444	1.0646429	0.61433935	0.33897448	-0.19306135
A_24_P5994	-0.17484617	0.777596	-0.45145082	0.09650278	0.64616823	0.7440553	0.9801183	0.25725508	1.4653668	0.17079973	-0.3333392	-0.50937796	-0.2586217	-0.57383204	-0.24275875	-0.09650278
A_23_P76015	-0.69568443	-0.27420902	-0.049531937	-0.241539	3.3221512	0.049531937	-0.35736752	-0.11535931	0.09343052	0.2568035	-0.75533104	0.14203072	3.5415344	0.20188999	-0.16273022	0.2929077
A_23_P206228	-0.77207136	-0.53534746	0.566936	0.17542982	1.818521	-0.4706006	-0.8003745	-0.74575377	-0.58286333	-0.17542982	-0.5826497	0.916101	1.8429046	0.3037238	0.1870122	0.68523264
A_23_P106708	-0.064935684	-0.005253792	0.6900253	0.2930298	-0.03856659	-0.12190151	0.005252838	0.05205536	-0.41706467	-0.12197304	-0.021977425	0.13888359	0.08711815	0.17096138	0.0460968	-0.27965927
A_23_P91217	0.62593555	-1.0011721	0.57941055	1.523324	-0.04518032	-0.5114279	-0.8723612	0.33475733	0.5776553	-0.29077482	2.0703468	-0.36306763	0.04518032	0.572042	-0.11077881	-0.53536606
A_24_P56407	-0.19662285	-0.06896591	-0.41958046	-0.042817116	0.24754715	0.11915779	-0.015873909	-0.11242962	-0.008399963	0.31163883	0.020429611	0.2946272	0.77228737	0.16596794	0.008399963	-0.24044037
A_23_P202540	-0.19417095	-0.8621912	-0.47711372	-0.038220406	-1.5252037	0.06733513	0.038220406	0.09853268	-0.5985842	0.110975266	0.21308708	0.5860214	-1.0088768	0.19978905	0.21748543	-0.3881092
A_24_P144773	0.6517105	0.49373055	0.849082	0.5460534	0.049931526	0.09364796	-0.049931526	-0.6462388	-0.2054863	-0.060007572	-0.2355957	-0.69816446	-0.26980448	0.18108034	-0.3639474	0.26452827
A_23_P115523	0.50261116	0.06276226	-0.12947273	0.47741604	0.6867895	-0.6079321	-0.22451401	-0.24572086	-0.3297863	0.0055246353	0.21290588	-0.054961205	0.42070007	0.18881798	-0.77719784	-0.0055246353
A_23_P63083	-0.3158722	-0.63813114	0.029099464	0.092476845	1.4150772	-0.07471943	-0.26299906	-0.029098988	-0.35827732	-1.1251807	0.099858284	-0.2873249	1.1301479	0.16780376	0.31163788	0.3669381
A_24_P203244	-0.044917345	0.3383534	0.43588424	0.15763211	-2.204817	-0.1550157	-0.47462106	-0.5091202	0.119306326	-1.0841467	-0.5380466	-1.5823343	0.044917345	0.54542184	0.30984187	0.051357508
A_24_P590317	0.18138695	-0.071593285	0.2844925	0.079862595	2.0495653	-0.21780682	-0.47740078	-0.47556782	-0.29378414	-0.1643076	-0.59371567	-0.09677887	0.7388296	0.5613413	0.4475088	0.07159233
A_23_P137143	0.047762394	0.50908136	0.11309385	0.32701826	-2.5833087	0.07066488	-0.10083437	-0.5975394	-0.052182674	-0.04594755	-0.36548567	-0.19288397	-2.0546165	0.04594755	0.47731924	0.27093363
A_23_P25163	0.18430424	-0.51933384	-0.56394386	-0.050172806	-2.1999836	0.026096344	0.021681786	0.1364994	-0.31538868	-0.16628742	0.6276045	0.72966194	-1.7442427	0.25544643	-0.021681786	0.26807022
A_23_P105264	0.16593313	0.19294882	-0.02788496	0.25619745	1.2907186	-0.33021784	-0.24878073	-0.4972062	-0.5449233	-0.27142477	0.36562777	0.02788496	1.2178264	-0.16411638	0.34863043	-0.07317591
A_32_P45087	-1.0066626	-0.96265817	0.40373492	-0.19004512	-1.2251565	0.47122312	0.006902933	-0.17814994	-0.8812759	0.37646556	-0.006902933	0.22669864	1.1196625	0.7848871	0.12744308	-0.3702891
A_24_P334378	0.27412987	0.014258385	0.38494587	0.168993	-0.79713535	-0.13431072	-0.40787315	-0.4042654	-0.6119957	-0.07427597	-0.5085516	-0.014259338	4.041551	0.63743305	0.51351404	0.14450741
A_23_P43490	-0.0012025833	0.0012025833	0.48076916	-0.10322571	3.8371935	-0.5306759	-0.85155964	0.33030128	-0.83095074	-1.1309328	0.2584734	-0.77708626	3.380333	0.38904	0.41808796	-0.43541908
A_24_P932598	-0.65894985	-0.60220337	0.19037247	-0.20324516	-0.45738983	1.1110077	-0.34688663	0.24661922	-0.001917839	0.10956049	-0.43691683	-0.08147907	0.28050375	0.5418577	0.1481185	0.001917839
A_32_P930685	-0.17164135	-0.39535713	0.94027805	-0.31651402	-5.1647477	0.4010172	0.5080738	0.15630627	0.44469166	0.4562378	0.585454	0.35430527	-4.8681593	-0.16372871	-0.40370655	-0.15630627
A_32_P142700	-0.28933382	-0.23529577	0.4021659	-0.08866072	-0.6521754	-0.17457819	-0.02912569	0.45222425	0.02912569	-0.4329133	0.51418066	0.13432741	0.5700574	0.5862889	-0.40281153	0.4998126
A_24_P484322	-1.7722235	-1.4676571	-1.0928898	0.035653114	1.8175325	0.4414072	-0.035653114	-0.1222949	-0.5006037	0.054320812	-0.17564297	-0.11279392	3.2288156	0.58995914	0.13906717	0.18281221
A_23_P48897	-0.47605824	-0.44136405	-0.07146096	-0.47286248	2.7263482	0.6453898	0.16490006	-0.35116935	0.26416516	-0.3831036	-0.17386127	0.07146096	2.664017	-0.35049462	0.3271196	0.14784026
A_23_P72050	-0.18641329	0.7372918	-0.097949505	-0.2557435	-0.33714628	0.6610074	0.37853384	-0.021682262	0.723474	0.020994663	-0.51115847	0.04524851	-0.53896666	-0.020994663	0.34752703	0.34194326
A_24_P141214	-1.2635069	0.23916817	-0.012633324	-0.9066534	3.202591	0.33471107	0.5302	-0.09610081	0.7628555	0.012633324	-0.21092224	-0.03882122	2.8144083	-0.46244144	-0.35666084	0.7748375
A_23_P135486	1.0897312	0.8105922	0.1741023	0.6707792	-1.376503	0.2394638	-0.6505618	-0.32684135	-0.0145254135	0.01452589	-0.3978982	-0.039899826	-0.61526537	1.2159905	0.4413104	-0.025719643
A_24_P475556	-0.4146762	-0.799376	0.83154345	0.055616856	0.23999262	-0.10730028	-0.5462756	0.004365444	0.04736471	0.6021104	-0.5857835	-0.004365444	-0.13205194	-0.15088701	0.1319766	0.04698515
A_32_P233834	-1.0848575	0.552485	0.5968046	0.34160662	2.39355	-0.15745306	-1.3566198	0.070168495	0.05474615	-0.8983226	-0.68188715	-0.054745674	1.22965	-0.6614399	-0.8875127	0.9739847
A_24_P243633	-1.8265724	-0.8137102	0.26989746	3.7318587	3.1667337	0.063305855	0.03111744	-0.5267248	-0.031117916	-1.0988984	-1.9177074	-2.1254597	2.4319425	-0.22389746	0.17604828	0.034976482
A_23_P258463	-0.519433	0.9743891	-0.15007591	-0.41684628	-8.744506	0.42883205	0.83831406	0.28021717	0.44080544	0.085523605	0.009112358	0.4757223	-8.339368	-0.17425156	-0.33941555	-0.009112358
A_24_P107257	0.11300182	-0.38656044	0.033966064	-0.033966064	-1.3959332	0.30339718	0.3082266	-0.08423042	-0.17026615	0.1561184	0.48577595	0.29710007	-0.8894348	-0.15323067	0.191535	-0.12114048
A_23_P60506	0.105279446	-1.1099677	0.07572222	-0.18110514	-2.446095	-0.36231565	-0.037020206	0.136868	-0.748116	0.47918558	0.6328778	0.7277379	-1.5488524	0.19453382	-0.33782244	0.037020206
A_23_P166100	0.069736004	0.236835	0.16719913	0.31241274	1.1628308	-0.30206823	-0.5326557	-0.89381504	-0.069736004	-0.70262337	-0.9034548	-0.42955303	1.4617648	-0.65200806	0.12836647	0.22128391
A_23_P203191	-1.038562	1.31547	0.05049348	-1.0997579	-4.2516212	0.48097396	0.45090365	0.77640843	-0.05049348	-1.3433564	-0.76857114	0.4367664	-2.7423832	-0.5980537	1.086755	1.0470364
A_24_P328668	0.757215	-1.7078257	1.5244765	0.9369445	-0.054318905	0.09978247	-0.05721712	-0.2664466	-0.07773447	0.054318905	1.000217	0.72789335	-1.0663958	-0.88139486	1.0637403	-0.26442194
A_24_P383834	0.521266	-0.1837368	0.25801563	0.10894394	-2.9186401	0.0296278	-0.120866776	-0.1203537	-0.2521391	-0.0296278	0.054535866	0.55298615	-2.1407242	0.23839188	-0.42729282	0.47285557
A_24_P523530	-0.09915018	0.45861006	0.65680933	0.56686306	-0.82212543	-0.28990078	-0.292758	0.099149704	-0.89273787	-0.60767794	-0.6813059	-0.2410779	0.88246393	2.3490934	0.7970257	1.2666078
A_24_P280664	0.24685764	-0.09670448	0.2719326	0.08990288	-0.5146761	0.016172409	-0.119478226	-0.12456703	-0.74505424	-0.09334564	-0.54448414	-0.016171455	1.0828104	5.8385143	0.8130417	0.45193195
A_23_P58763	0.025472641	0.7565994	-0.30232906	-0.1394701	0.07990646	0.22047424	0.18733883	-0.06468582	0.068725586	0.09341526	-0.23613739	-0.06346321	0.69171524	-0.17745495	-0.025472641	-0.04761505
A_32_P14178	-0.4228716	0.0542264	0.6493707	0.115087986	-1.7963343	0.7199831	0.516603	-0.06989956	-0.26996756	0.37484837	0.33875608	-2.134448	-1.040019	-0.6112046	-0.05422592	0.52470064
A_23_P57534	0.34807634	0.019964695	-1.063611	-0.019964218	1.0493641	-1.0878282	-0.90954685	0.3792882	-1.1046009	-1.1127996	1.1318183	0.9773774	0.25979233	0.7887535	-0.66567373	-0.53674555
A_23_P140675	-0.06836176	0.35619164	0.66210604	-0.04239273	-0.30522728	0.08860254	-0.5972886	0.042393208	-0.76544905	-1.0421801	-1.0946693	-0.76067924	0.7473326	1.0700965	0.94974756	0.71172905
A_23_P66085	-0.09077644	0.39075565	-0.1704855	-0.20132828	0.60801315	0.26451492	0.44484806	0.0070056915	0.15824318	0.16021252	0.10494232	-0.5044737	-0.19988918	-0.35578966	-0.0070056915	-0.032816887
A_23_P51410	-0.3811562	-0.078152895	-0.44045186	-0.9459951	-0.6395781	0.358608	0.5049503	0.08736014	0.15834689	0.28513312	-0.3720429	-0.05881238	0.05881238	-0.10847783	0.064818144	0.11173701
A_24_P324644	0.3743534	-0.11487579	-0.17625237	0.36274529	-1.1297426	0.022369385	0.1973629	0.40313816	-0.29877377	-0.022369385	-0.31138515	-0.37887478	-0.039218903	0.42792225	0.62244606	0.42747593
A_23_P126735	-0.75982857	0.0046691895	0.08505583	-0.0046691895	-0.33131123	0.605186	-0.3748703	-0.54796124	0.14082718	-0.39166307	-0.29633665	-0.42310333	0.889256	0.43563843	0.1953969	0.18039036
A_23_P204048	-0.0719161	-0.22179651	0.038320065	-0.3222232	0.3023877	-0.45211744	-0.14590025	0.13108778	-0.46637774	0.19595194	0.22869062	0.18024874	1.023025	0.06944132	-0.062078953	-0.038320065
A_23_P60225	0.08648682	-0.8461008	-0.21166325	-0.18191147	0.41454983	-0.7500944	-0.07792759	0.31847668	-0.72959423	0.30016804	0.7758503	0.42843437	0.50971985	0.07792759	-1.0137587	-0.27185726
A_24_P256692	-0.21705937	0.27484822	-0.09220481	-0.051742792	1.346484	0.6582968	0.48490262	0.0011451244	0.8987644	-0.055941343	-0.953017	-0.3677919	0.82804465	-0.3963797	0.3782413	-0.0011451244
A_23_P124438	-0.26437736	-0.07635236	0.25857997	-0.46417737	-2.873482	0.7017987	0.3781073	0.2912457	0.3038962	-0.02423215	0.20420575	-0.23685813	-2.2986724	-0.3521998	0.45296693	0.02423215
A_24_P690811	-0.10935259	0.17733955	0.13890171	0.5373802	-0.02802229	0.02802229	-0.35582113	-0.12587929	-0.5343838	-0.8257203	-1.5945134	-0.9973092	1.1470256	1.210804	0.64154005	0.9184241
A_24_P294408	-0.07650423	0.43389797	0.11308479	1.0843811	0.07650423	-0.10732651	-1.7139273	-0.64963007	-1.7928553	-1.9865236	-2.4683523	-1.9196863	1.7435017	1.6318007	1.4107509	0.9013438
A_32_P199529	-0.24795914	0.698493	-0.010425568	-0.73640966	0.18637753	0.20868921	-0.063206196	0.010426044	-0.3182974	-0.38482523	-0.58722496	-0.46020794	1.1698899	1.2732177	0.77486086	0.9596982
A_24_P53353	0.18395042	0.034867287	-0.46137333	-0.2489028	0.7143698	0.008804321	-0.008803844	-0.21291018	-0.14250088	-0.84610605	0.07654476	0.2500682	0.12544298	-1.6224437	0.573544	-0.45841312
A_23_P20864	0.1873393	-0.2670436	0.0049147606	0.31968832	2.7144494	-0.9858804	-1.011064	-0.46975088	-0.15102053	0.27190733	-0.08593702	0.32557917	3.3213344	0.4722705	-0.353189	-0.0049147606
A_23_P385690	-0.9836898	0.98220253	-0.54848576	1.2959976	-4.4634285	0.6159773	-0.0044665337	0.24792671	-0.12084484	0.82594395	0.0044665337	0.06980276	-4.3154554	-0.45820093	-0.91487837	0.27744102
A_23_P80759	0.053144455	-0.40269184	0.36320496	-0.01908207	-1.5320387	0.19602776	-0.163023	-0.120069504	-0.35260868	0.25720024	-0.049120903	0.01908207	0.12265301	0.45762825	-0.73003197	0.26286125
A_24_P286465	-0.347054	-0.7729869	-0.12791681	0.055767536	4.7159195E-4	0.2626996	-0.17828894	0.235888	0.112411976	0.31505156	-0.29610014	0.12554884	0.19126272	-4.7159195E-4	-0.05863428	-0.37623358
A_23_P218295	-0.07908273	-0.298414	-0.022136927	0.022136927	-1.9675372	0.126364	0.28826785	0.20778489	-0.2874062	0.2543056	0.26884532	0.11267829	-1.0615933	0.102121115	-0.030746698	-0.30557513
A_24_P221105	0.19479084	0.33384037	-0.072805405	0.16434956	-0.41674137	0.03264427	-0.03264427	0.2190857	-0.7656908	-0.50106525	-0.47708035	-0.15905571	-0.516943	1.0369053	0.6416826	0.47224426
A_23_P74081	0.42049932	-0.10854101	-0.37919092	-0.07736063	-1.3371491	0.7536235	0.8371024	0.81130314	0.5102229	-0.3063321	-0.15147877	-0.65104246	-0.22020864	0.12863779	0.07736063	0.20579386
A_24_P590806	-0.5444803	-0.61933756	0.031764507	-0.4444976	-0.778749	0.9645939	-0.031764984	-0.07293987	-0.56581545	0.38630056	0.25571108	0.8551593	1.2427192	1.0044045	-0.55929613	0.4031148
A_24_P120352	0.29468536	-0.27348232	-0.16714	0.26467323	-0.20628548	0.008523941	0.2385664	0.022938728	0.0178051	-0.008523941	0.06208515	0.03986454	-0.69219685	-0.05212021	-0.21656418	-0.25803375
A_23_P150818	-0.0149998665	0.79054594	0.0840621	-0.07528162	0.8395066	0.38287497	0.0149998665	0.5427213	0.77365065	-0.46370935	-0.1017251	-0.55125475	0.4515376	-0.45188093	-0.01712656	-0.11351538
A_32_P741851	0.45529723	0.23833442	0.0045511723	-0.02188611	-6.994157	0.82926536	0.8485172	0.34258628	0.12649608	-0.47967172	-0.0045511723	-1.7867854	-4.2424326	-1.1847489	0.05540061	-1.0753448
A_32_P153604	-0.45002174	0.28476715	0.81594896	0.4880376	-0.065386295	0.15121937	-0.75042105	-0.36485338	-1.0802078	0.029386997	0.120100975	-0.9883399	0.7742777	0.7741151	-0.08146143	-0.029386997
A_23_P66260	-0.33847475	0.5666175	0.31908464	-0.31767893	-1.8545642	0.65682364	0.50471354	-0.68417025	0.68966246	0.09279394	-0.13882494	-0.09279394	-1.6653295	-0.30031347	0.15765524	0.3836007
A_23_P107942	0.06980324	0.3339367	-0.29672146	0.19948483	-0.65298176	0.2385521	0.35220623	-0.36226082	0.28755665	0.2307272	0.14564896	-0.06980324	-1.4233804	-0.22098446	-0.15275288	-0.47439575
A_24_P205130	0.0064730644	0.501266	-0.34016466	-0.32973242	1.0270095	0.04735136	-0.15853453	-0.19083929	0.46524763	-0.34612036	-0.6431155	0.009674549	0.8411555	-0.0064730644	-0.47212934	0.14535856
A_23_P18518	-0.6811116	-0.3345406	0.31995177	-0.7873056	-0.3308289	0.2014997	0.5207083	0.56393933	-0.024276972	-0.009097815	0.11971927	-0.5566704	0.60284114	-0.14160705	0.009097815	0.41801667
A_23_P43369	0.8085599	0.41141176	0.20451021	0.6249175	-5.6926847	-0.5096984	0.019178867	-0.069980145	-0.029809475	-0.019178867	0.22885561	-0.43921614	-3.748197	0.49503946	0.23461771	-0.33099508
A_24_P915963	0.25340843	-0.013062477	0.33759308	0.15755177	-0.69027233	-0.08596611	-0.311368	-0.33783436	-0.6659641	-0.06105423	-0.5141125	0.013062477	0.9221387	0.72366333	0.6199446	0.24407482
A_32_P227110	-0.7104039	-1.5782442	0.49691105	0.16121054	0.5451708	-1.2909331	-0.36293793	1.3653975	-1.2597275	-0.37998438	0.894752	0.9354725	-0.45280266	-0.09651995	1.1344109	0.096520424
A_24_P415150	0.017272472	1.7308741	0.82817984	0.2658863	-2.283286	0.46724033	0.22937727	-0.95427513	-0.9064212	-0.22290277	-0.017272472	0.32914734	-1.374013	-0.35929298	1.0842357	-0.27267218
A_32_P165611	-0.07154703	0.33826017	-0.41166544	-0.03391123	0.31472635	0.007139683	-0.007139683	0.1966281	0.561131	0.18749857	-0.07946825	0.23642969	-0.29121685	0.10557222	-0.28614092	-0.029793262
A_23_P390032	-0.04219246	0.04219246	-0.19965982	0.09802151	-0.36658812	0.045131207	0.37675047	0.12906694	-0.19217062	0.17132092	-0.10681248	0.38710642	-0.1344595	-0.15783978	-0.87419224	0.4924407
A_24_P780789	-1.2887039	-1.6133142	-0.11694574	-1.2832608	0.60149	1.0144973	0.24505615	-0.23505592	-1.0211926	0.41134167	-0.08634281	0.27352524	2.5118613	0.45880222	0.08634329	-0.74814606
A_24_P912021	-0.3272462	-0.584661	-0.2355032	-0.42451334	0.7073083	0.19453096	0.14562368	-0.63737535	0.0974288	-0.17273092	0.0031571388	-0.58128214	2.102807	0.10275698	-0.0031571388	0.26385593
A_24_P261691	-0.0832057	0.25776148	0.557549	0.51815367	-0.2930646	-0.5962596	-0.22886372	0.08320618	-0.8092127	-0.42418814	1.7308745	-1.8456802	0.9753008	0.8179035	0.16508007	-0.24616718
A_24_P187766	-1.0065355	-0.7169652	0.12636852	-0.2860489	1.7524214	-0.012516499	-0.0050210953	0.31053972	0.4269123	0.005021572	-1.5387459	-1.1784525	1.2645855	0.32060432	-0.2529521	1.5546241
A_23_P391938	0.47214842	0.027000904	0.5815096	0.62953997	4.080374	-0.27578163	-0.43690348	0.26619768	-0.027000904	-1.8415747	0.9179969	-0.809597	2.3218613	-0.10818863	-0.29516315	-1.7308855
A_23_P250196	-0.009313107	0.3283267	-0.4859395	-0.023922443	1.0713677	0.2769475	0.1520114	-0.5979638	0.10162687	-0.32562876	-0.6131797	-0.69434977	0.7778802	-0.7709336	0.69508886	0.009313107
A_24_P177763	0.058511257	-0.9820752	0.033785343	-0.6464238	0.053265095	-0.20355368	0.057623386	0.12723112	-0.52662706	-0.033785343	0.8758912	0.73847723	0.6751561	-0.053781033	-0.3440795	-0.15283537
A_23_P166964	-0.06495905	-0.15722895	-0.23134851	-0.1593461	-2.2929215	0.47869253	0.5098319	0.34306192	0.06495905	0.124249935	0.33140326	0.12872648	-1.7223868	-0.17301607	-0.10005903	0.25160074
A_32_P139196	0.6968937	0.05559349	0.30223465	-1.048624	-9.999852	1.1138611	0.52294636	0.6585665	0.44679356	-1.6584005	0.2990446	-3.57552	-7.373809	-2.1768913	-0.05559349	-0.46590424
A_23_P28307	0.019003391	0.43241453	-0.53543043	0.34992075	0.599154	-0.56388617	-0.6700511	-0.27071905	-0.121174335	-0.019003391	-0.6665368	0.57333994	0.71795225	0.09493399	-0.21436739	0.09246302
A_23_P144134	0.17371225	0.84709024	0.248415	0.66703176	1.4235926	-0.04768324	-0.18969822	-0.56821823	0.047682762	-0.44612122	-0.35502625	-0.747694	0.7311039	-0.74914265	-0.14722157	0.2688117
A_23_P5392	0.2138648	0.14059782	-0.6605334	-0.10706663	-0.45356417	0.17402792	0.33499098	0.3162675	0.24634409	0.09138727	0.32054472	-0.23436785	-0.4143014	-0.09138727	-0.19483137	-0.20695734
A_23_P331177	-0.14427042	0.48756027	0.16996908	0.6223092	-0.54297686	0.1442709	-0.3372178	-0.31501627	-0.5600743	-1.1982164	-0.922174	-1.1832318	0.9737592	1.3240061	0.7518225	0.5155668
A_32_P25775	-0.44239116	-0.5041597	0.3865912	-0.3187325	-1.35203	1.0424378	0.1366818	-0.4399221	-0.4394176	0.5460856	0.11714673	0.20247293	0.5584538	0.57375264	-0.11714673	-0.16800427
A_23_P44942	0.33409715	0.4564631	0.004484892	0.22390819	-1.453696	0.42750955	0.29807782	-0.061701536	0.2976544	-0.016387701	-0.004484892	-0.17717862	-1.8417556	-0.3183596	0.49204516	-0.102292776
RC9	0.23796082	-0.018366814	0.2950859	0.17759705	-0.6210718	0.009110451	-0.22982597	-0.23732758	-0.65851593	-0.040759087	-0.54079247	-0.009110451	0.9807019	0.829597	0.6712074	0.31497192
A_23_P395954	-0.25358582	0.27816963	0.39933538	0.38831854	0.18563986	-0.0899806	-0.20937824	0.6861634	-0.12359285	-1.240284	0.08998108	-1.6569748	0.56873274	0.7119889	-0.21991062	-0.17543936
A_23_P57277	-0.05668974	-0.3224454	0.05668974	-0.16319323	6.052791	2.4974017	-0.46527815	-0.10469103	-0.93805265	2.248816	-0.8144326	-0.3460412	5.8741903	1.6604161	0.75755215	0.953609
A_32_P44047	0.12055588	-0.14826965	0.23562527	0.01282692	4.472245	0.78317165	-0.54230213	-0.5708227	-0.62980366	-0.22261047	-0.6673651	-0.16913033	6.286962	0.481287	0.3490181	-0.012825966
A_24_P156388	0.80399275	-0.5688853	-0.6383772	0.7619691	0.42459345	-0.014647007	0.35341883	0.37318563	-0.19789457	0.014647007	0.027239323	-0.1960187	-0.11788082	0.42325354	-0.55437994	-0.05957365
A_32_P192745	0.12164974	-0.15454292	0.24052238	0.01128006	0.9963441	-0.28438568	-0.56853104	1.3301191	-0.75275135	-0.21783829	-0.67004776	-0.1677208	0.6382036	0.48342657	0.345294	-0.011279106
A_23_P386450	0.20177698	-0.94350433	0.26350927	0.046215534	1.3513112	0.08162451	-0.53275156	-0.3871169	-0.046215534	-0.44447374	-0.8685069	-0.687665	0.7582259	-0.7943039	0.450768	0.13461256
A_24_P344666	0.12169099	-0.74110913	0.6688831	-0.2576902	-5.479599	0.14066434	-0.39769387	-0.12335467	0.16669297	0.33077502	-0.61131644	0.0705874	-3.9072268	0.03127551	0.013628721	-0.013628721
A_24_P354300	0.55494356	-0.14247179	-0.34138346	0.4282508	-2.5729551	-0.050414562	0.33126783	0.41262388	-0.2566743	0.20515585	0.38416147	-0.06617594	-2.5382895	0.100949764	-0.21027136	0.050414562
A_23_P86975	0.29210186	-0.010272026	0.42368603	0.17187595	-0.75181293	-0.103302	-0.39190578	-0.4330263	-0.568141	-0.031033516	-0.5100603	0.010272026	0.8095226	0.66622114	0.5093374	1.852848
A_24_P103363	0.17751026	-0.43999338	0.2831955	2.904757	1.4086394	1.3935213	-0.19786072	-0.05177641	-0.33697605	-0.5204601	0.051775932	0.20866919	0.4772296	-0.46029425	-0.3348055	-0.21358538
A_24_P333112	0.0035514832	-0.35095215	-0.0035514832	0.188941	-1.0505934	0.37120152	0.27000237	-0.32289028	-0.35939217	-0.26051235	-0.28998852	0.09126949	-0.41011047	0.12756443	0.36967373	0.19180965
A_23_P412321	0.13347435	0.42696238	-0.10779858	0.92042446	-0.13765478	0.052159786	-0.3477559	-0.42834902	-0.052160263	-0.57163334	-0.655673	-0.8326106	0.76925325	0.7353215	0.26411963	0.5400286
A_24_P19662	1.0251803	0.45184946	-0.34894896	0.7216134	-0.3755355	0.7539773	0.7554002	0.058549404	0.25414705	-0.058549404	-0.72833014	-1.4414587	-1.0013599	-0.69212914	0.08014727	-0.7399268
A_23_P204436	-0.37677407	-0.112012625	-0.25579906	0.04728484	0.37143016	0.021673918	0.21049094	0.032065153	0.29813933	0.53015876	-0.13724732	-0.021673918	0.6848066	-0.31823182	-0.16171813	-0.025031805
A_23_P122579	0.8094511	0.3268118	-0.4835329	0.7223406	0.335495	-0.074625015	-0.010875702	-0.049723625	-0.046277046	0.059535027	0.17486668	-0.177207	0.010875702	0.043795586	-0.23746681	-0.33894062
A_23_P19243	-0.26958156	-0.12707162	0.1645391	0.13085723	-0.74361634	-0.10088277	0.0052354336	0.5965364	0.08493924	-0.04888177	0.41575265	-0.0052354336	-1.6741879	-0.28167224	0.12867284	0.5681751
A_24_P54000	-0.05927801	0.4909129	0.290483	0.04616785	1.3171763	-0.2131896	-0.04616785	0.31469393	0.05543375	-0.40374136	-0.4875064	-0.65558004	1.1967764	-0.50325584	-0.098432064	0.19512367
A_32_P116233	0.22051239	-0.12910366	0.24388313	1.6757245	-0.39137268	0.04911995	-0.13502121	-0.1399908	-0.7757015	-0.13148308	-0.5716715	-0.04911995	1.0524077	0.87762547	0.7881527	0.42875338
A_23_P394246	-0.5791187	0.45358276	0.13433361	0.5042877	-1.3220811	0.4023881	-0.13433409	-0.17433643	-0.87679577	-1.4163365	-2.0825033	-2.6252112	0.81672764	1.3503604	0.9334378	1.2182875
A_23_P109193	-0.17426968	0.08896017	0.38495207	-0.045402527	-0.7478318	0.33491993	0.045402527	0.22692299	-0.23814583	-0.07862997	-0.2493639	-0.65673304	-0.17760038	1.9972873	0.8515773	0.373003
A_23_P67702	0.0503726	0.56319666	0.06213236	-0.90272665	-1.5092111	0.79626226	1.3155284	0.350657	1.0915465	-0.21962786	-0.47056532	-0.7138343	-2.585092	-1.3597751	-0.04015875	0.04015875
A_24_P941006	-0.29545975	0.5843673	0.26701736	0.6770396	-1.2033081	0.22001171	-0.6825886	-0.22001219	-2.0722609	-1.3566895	-1.7042322	-2.34202	1.0741014	1.3134937	0.9795785	0.9874091
A_23_P387624	-0.055412292	-0.16737652	-0.028348923	-0.19475174	0.27775908	1.7200322	0.028348923	-0.43818474	0.7260771	-0.38192177	-0.84394073	-0.04571724	0.7827406	0.59873676	0.5062847	0.14406109
A_23_P250842	0.18057156	-0.1520567	0.20847034	0.046108246	1.2257652	-0.046108246	-0.20224476	-0.2077589	-0.8034487	-0.14196873	-0.6072464	-0.07082939	1.0183625	0.8326349	1.0290747	0.37690496
A_32_P82701	-0.82361174	-0.53472614	-0.2967186	-0.77294064	1.5323591	0.5074544	1.1076689	1.6596012	-0.809762	-0.10249758	0.1024971	-1.0740743	-0.2654233	1.1875424	0.9054656	0.77680206
A_23_P11629	-0.3722589	0.28304744	1.1297405	-0.026063204	-0.833163	-0.18484664	-0.11258578	-0.1481607	-0.13823628	-0.54782605	0.026063204	0.07309508	0.14505076	0.23639035	0.5405762	0.61821294
A_24_P337000	-0.6952696	-1.3295946	-0.13268185	-1.2318201	0.52405643	0.16776657	0.34914875	0.23583412	0.25838184	-0.09183979	0.1122303	0.09183979	0.7713232	-0.84292793	-0.5909128	-0.38013363
A_32_P32789	0.8213711	1.053266	0.6495118	0.9736748	-0.40114307	-0.63338137	-1.1846099	-0.9483776	-0.6206603	-1.8087549	-2.0786762	-1.8374949	0.66491985	0.97102594	1.1670318	0.40114307
A_24_P194962	0.082971096	-0.031171322	0.03915167	-0.3302884	0.013894558	0.37922144	0.73316526	0.49153662	-0.038889408	0.059878826	-0.013894558	0.257936	-0.6166682	-0.3502221	-0.325624	-0.3618884
A_32_P128586	-0.6671133	0.8315058	0.6008463	0.019716263	0.88366604	-0.012395859	0.08236408	-0.22329521	0.012395859	-0.06017685	-0.035987854	0.66281414	-0.11434841	-0.20711231	0.49626064	-0.4717188
A_23_P64712	-0.042014122	0.017195225	-0.07339144	0.108065605	0.9262004	0.30894327	0.50976706	0.17569494	-0.16606045	-0.28981924	-0.81346416	-1.562849	2.0243301	0.494905	-0.101322174	-0.017195225
A_24_P380234	0.0566144	-0.15540743	0.5731225	-0.20246649	-1.3803382	0.5390725	0.4168973	0.04559183	0.36585855	-0.04559183	-0.72122145	-0.55259275	-0.5797696	-0.42525434	0.15827322	0.15871191
A_23_P301925	-0.046729088	0.729496	1.2246838	-1.3853369	3.6540709	0.0010251999	-0.0010251999	2.7487783	0.7471018	-1.3232832	0.8678808	-1.344409	2.0523577	-0.660738	-0.3734932	-0.06418514
A_23_P125253	0.02814579	0.2420845	-0.2128849	-0.51620865	1.7433739	-0.02814579	0.15670109	0.1523037	-0.09748554	-0.42468834	-0.2090292	0.05797863	0.70208263	-0.12605715	0.71458626	-0.051008224
A_23_P119562	-0.23671007	0.0093951225	0.7877426	-0.32314444	2.5024576	-0.016218662	-0.035289764	0.23208141	0.4270897	-0.4213724	0.668746	-0.0093951225	3.1993608	-0.08657265	-0.020452976	0.75897694
A_24_P5750	0.039436102	0.34575295	0.35095096	0.6136234	-0.10251498	-0.039436102	-0.56915593	-0.39598107	-1.6386869	-1.7166097	-1.5975826	-1.8071268	1.5612962	1.6395252	1.0722344	0.699661
A_32_P212520	-0.023111343	-0.3654089	-0.66680527	0.2213335	1.4761071	-0.12346268	-0.008755207	0.014667034	0.008755684	-0.6108017	-1.0914698	-0.8367734	0.9022932	0.026837349	0.4091258	0.13450575
A_24_P180849	0.038840532	0.5669906	0.043487787	0.43006444	-1.2034614	-0.1592238	-0.038840532	-0.097449064	-0.16882825	-0.5867717	-0.771682	-1.1667888	0.20770192	0.5108144	0.13980937	0.15098119
A_24_P109633	0.13794494	0.29968715	0.2276752	0.005248308	-1.9238989	-0.17840981	-0.28928685	-0.41430068	-0.342592	0.6366198	0.41235948	-0.005248308	-1.2548296	0.20742774	0.57575727	-0.45783782
A_24_P85117	0.4377885	8.0251694E-4	0.491508	-0.20721388	-2.4530864	0.11380148	-0.0607934	0.48090363	0.06912708	-0.38850927	0.3031969	-0.6306205	-2.8955326	-0.026667595	-8.029938E-4	0.6397419
A_23_P410473	0.7714305	-0.38487053	-0.096152306	1.1882873	-4.928902	0.11461401	-0.05414915	0.27320433	0.035120487	0.2430377	0.0096488	-0.28810596	-5.01047	0.34132147	-0.0096488	-0.29100323
A_23_P3242	0.054772854	0.14331198	-0.178967	0.05613184	-2.7349238	0.16053915	0.13253832	-0.0757947	-0.054772854	0.06504774	-0.16230154	0.1216836	-2.506311	0.29247808	-0.2990613	-0.12741423
A_23_P153050	0.08289242	-0.5014963	-0.32033157	0.007982254	0.9636564	0.391263	0.59086704	-0.32635498	-0.07817078	0.21721935	-0.007982254	0.3583889	0.5204153	-0.17337322	-0.012537003	-0.5997648
A_23_P70867	-0.22357082	-0.31278896	-0.3779726	0.11861801	1.7423754	0.30578136	0.2135992	-0.006999016	-0.5103626	-0.12031555	0.29041386	0.006999016	2.463296	-0.022994995	0.44016266	-0.062521935
A_23_P94689	0.44111776	0.5924473	-0.7170887	0.34067917	1.6427126	0.01618433	0.48140097	-0.01618433	0.04961109	-0.32589626	-0.071192265	-0.86556196	0.8136287	-0.1817298	-0.09551287	-0.327662
A_24_P258235	-0.3610916	0.37080145	0.04501009	0.10318041	0.19455957	-0.04501009	-0.80655384	-0.104614735	-0.92231846	-2.578558	-0.85076046	-1.9894319	0.6911211	0.9658747	0.51566887	0.09903431
A_24_P377895	0.07976627	-0.11134243	0.14947987	-0.013747215	-0.42726612	0.41662788	-0.42905235	-0.4622345	-0.63754845	0.013747215	-0.68977547	-0.14715481	0.81416416	0.61134815	0.5093789	0.41562223
A_32_P117760	-0.2028315	0.35307145	0.14451241	0.21000218	0.5247438	-0.06876254	-0.5797007	-0.26677632	-0.62150407	-0.8508661	-0.726681	-1.0144136	1.3113234	0.68519664	0.26648068	0.06876254
A_24_P222758	0.053485394	-0.40862226	-0.008900166	0.13000154	-0.9168725	-1.0209956	-0.40693998	0.008900166	-0.5565562	0.23033094	0.29327154	0.2569518	-0.49095488	0.3207078	0.18380117	-0.04977274
A_23_P107981	-0.09120512	0.4806409	0.4131632	0.76902676	-0.32237673	-0.18169928	-0.19821787	0.4009714	0.09120464	-0.415092	-0.69676065	-0.3120017	0.47376013	0.9797902	-0.20125341	0.5278559
A_23_P428992	-0.039484978	-0.06760502	-0.07382488	-0.120144844	-0.57725143	0.039484978	0.15795231	-0.12622452	0.09480953	0.27387524	0.35219765	0.3774271	-0.58132935	0.17026138	0.07857418	-0.20237064
A_24_P942296	-0.3521495	0.33314657	0.10797691	0.2030859	-0.87197685	0.53730774	0.14923096	-0.10797644	0.7174101	-0.5690651	0.23801613	-0.9575372	-0.2979021	-0.28164005	-0.2543006	0.4260168
A_32_P100379	-0.11972189	0.14087486	0.11972189	0.3318286	3.6227903	-0.2967415	-0.7938714	-0.2000103	-1.4942636	-0.7865672	-0.6555276	-0.23848915	4.111288	1.4461889	0.7562108	0.7834377
A_24_P926606	-0.3175335	0.4209299	0.7790332	0.55638885	-1.2987828	-0.44059658	-1.781476	-1.0091581	-1.9436436	-1.2169161	-1.5871515	0.6444478	0.7913227	1.2004795	0.48313522	0.31753397
A_24_P332064	-0.15970802	-0.21541405	0.68849564	0.04627514	0.24865913	-0.287673	-1.2980337	-0.20241165	0.03460598	0.03637123	-0.03460598	-0.1028738	1.635931	0.8994236	-0.096004486	0.38334846
A_32_P78623	-1.1074171	-0.07140255	0.4004388	-1.5545721	-0.23372793	0.6102443	-0.7432928	0.65107393	1.1650023	-1.7737026	-1.1097221	-1.7005434	0.41310453	0.22360897	0.2280016	0.07140207
(+)eQC-39	-0.058695793	0.17725563	0.3007946	0.058695793	-0.42749214	-0.2499981	-0.5188618	-0.48285198	0.20790005	-0.16937923	-0.32593346	-0.2563343	0.7217674	0.8981066	0.481853	0.096105576
A_23_P206920	1.7069798	0.031386375	1.8771892	2.434154	-2.5356212	-0.78585005	-1.2660995	-0.9633517	-0.3933115	0.34418058	0.44451237	0.2105856	-1.7132301	0.5736489	-0.7391863	-0.031386375
A_23_P103361	0.50456285	0.09741926	-0.069061756	0.48239183	-7.491158	-0.09497881	0.08904886	-0.098639965	-0.30299234	0.08118677	0.4824767	-0.08017683	-6.3716235	0.069061756	0.1099534	-0.42978144
A_23_P118536	-0.021973372	0.92790246	-0.20865464	0.20215774	0.4482844	0.22419763	0.12010646	-0.7857959	-0.41560054	-0.012344599	-0.5642173	-0.20303798	1.0344841	0.012344599	0.24173379	-0.17613244
A_24_P678104	1.3450189	0.21046114	-0.4096341	0.96073484	-2.7574496	-0.11925554	0.32728624	0.03183317	-0.14922857	0.018266201	0.2807002	-1.1519561	-2.5132408	0.09313154	-0.018266201	-0.7363
A_24_P352445	-0.02282095	-0.30705595	-0.08403444	-0.09341383	-2.4343152	0.5749793	0.4742694	0.04519415	-0.06354189	0.24663877	-0.14962816	0.44361162	-1.5931659	0.14712381	0.7074094	0.02282095
A_24_P216654	-0.015405655	-1.0905218	-0.13162994	-0.04191208	0.9021759	0.015405655	-0.070521355	0.34426594	0.08775711	0.14957619	-0.40905666	0.4680233	1.5628929	-0.038576126	-1.1658602	0.30194664
A_23_P104086	0.58314824	0.020525217	-0.1431663	0.7534239	-0.6170738	0.31166196	-0.07547927	-0.013678312	-0.34371448	-0.47286677	-0.62586665	-1.1802499	0.013678312	0.4695542	0.7824595	0.032420397
A_23_P431268	-0.19918537	-0.73545265	0.627615	-0.4567032	-0.76573086	-0.07646847	-0.24937725	0.0134058	0.029064178	0.38377476	0.17947102	-0.0134058	0.071557045	0.27363777	0.46686363	-0.21469688
A_23_P153070	-0.09670782	0.018423557	-0.32127428	0.07120085	0.82661104	0.12230444	-0.013949871	-0.107877254	0.013949871	0.08809614	-0.5552335	-0.14953089	0.5058732	-0.073474884	0.028662205	-0.37281942
A_24_P164664	0.17520142	-0.07732105	0.27163696	0.07732105	-0.8535452	-0.21083164	-0.46200562	-0.466012	0.2653985	-0.16095066	-0.59567165	-0.09173012	0.75904083	0.5738044	0.46442175	0.08667469
A_32_P85753	0.081609726	0.1344738	0.17900848	-0.01651764	-0.044197083	-0.30738163	-0.5609989	-0.5631838	-0.8196392	-0.058413506	1.5388718	-0.18760204	0.65909004	0.47554588	0.36508083	0.01651764
A_24_P900730	0.22409582	0.25022984	0.34685612	0.9018979	-0.5156541	-0.5840306	-0.56753397	-0.17968655	-0.50519943	-0.18648481	0.13540316	0.022184849	-0.022184849	0.6731658	0.714067	-0.04715252
A_24_P564462	-0.02414751	-0.602901	-0.03893614	0.078402996	-1.0998902	-0.09918451	0.17187262	0.02414751	-0.33492422	0.1886859	0.027422428	0.43650675	-0.548625	0.12923193	0.35183382	-0.3023944
A_23_P80643	0.165524	0.5047803	-0.5830045	-0.07293177	-1.040462	0.11180353	0.21615934	0.08303976	0.21027136	-0.18771791	0.2257514	0.07293177	-1.4347682	-0.2834792	-0.5345111	-0.36920404
A_23_P90014	0.099181175	0.14624214	-0.6576662	0.140028	2.4973717	0.10618496	0.2059784	-0.17699051	0.1117363	-0.4510107	-0.38332272	-0.8845897	1.808856	-0.16593075	-0.43189335	-0.099181175
A_32_P39324	-0.52052784	-0.5649414	0.57912254	0.3378296	0.04223728	0.8943615	-0.18099785	-0.67046547	-1.1437912	-0.04223728	-0.43028545	0.07152653	1.892827	0.98486996	0.31906796	-0.12873936
A_24_P730679	0.26734257	0.012752533	0.37137127	0.16630936	-0.012751579	-0.13549042	-0.40357018	-0.39887905	-0.6246929	-0.07660675	-0.5103073	-0.014644623	0.8109684	0.6378856	0.5197234	0.14682865
A_24_P67268	0.25444412	0.33998394	0.10293102	0.43558598	-0.8515253	-0.3983698	-0.62920666	-0.40163422	-0.47159767	-0.101579666	-0.03197384	0.11030388	-0.20595932	0.30214787	0.31200218	0.03197384
A_32_P13202	-0.34423828	-0.02132225	1.276917	-0.13175678	-0.05585909	-0.4594202	0.3435154	1.324882	1.0689445	-0.6885929	0.6298218	-0.10532808	0.19062662	0.02132225	-0.10022545	0.5626373
A_23_P416705	0.28092003	-0.0938611	0.2825904	0.41502714	0.42293596	-0.22550774	-0.20647621	0.061370373	-0.3767991	-0.82284117	-0.12454319	-0.9917989	0.5538707	0.47850752	0.30542612	-0.06137085
A_24_P927287	-0.057418823	-0.31905842	2.2004728	0.30805588	-1.1300802	-0.46403408	0.08522892	2.6850543	0.057418346	-0.40104866	-0.8407593	-0.3446741	0.4701891	0.30504227	0.42434835	-0.18778038
A_32_P394491	-0.33864307	-0.60280514	-0.22777176	0.21350622	-0.8315382	1.0608654	-0.383543	-0.022724152	0.7207713	-0.40348244	0.1091609	-0.62680817	0.18579197	0.022724152	0.98782635	0.07791042
A_23_P402604	-0.13060856	-0.3391304	0.62490654	-0.5526037	-4.2505417	0.46985912	0.23877525	0.19590187	0.37761974	0.6074686	-0.06711388	-0.115047455	-3.352354	-0.16478539	0.5529566	0.06711388
A_23_P69868	0.07992315	0.043058872	-0.056203365	-0.06590414	-1.194201	-0.19983244	-0.043058872	0.3585677	-0.21210814	0.3232484	0.43925905	0.7025037	-0.29162073	0.6302533	-0.086407185	0.3171153
A_24_P72064	-0.79827833	0.035538197	-1.3985915	-1.6238294	3.5257578	1.1916046	1.302319	-0.2636323	-0.035538197	0.4617529	-0.48511457	-1.8034396	2.8881717	-1.1534524	0.0741806	0.43216515
A_23_P142738	-0.14764571	0.913954	0.15632129	-0.035375357	-0.52898383	-0.2017405	0.15952325	-0.08769536	-0.25145698	0.2102797	0.06435609	0.035375357	-1.2040946	0.124887705	0.14229941	-0.17652631
A_23_P168165	0.054019928	-0.0039663315	0.0039663315	0.23021936	-0.8281946	0.044086456	-0.45332575	-0.34896517	-0.19579458	-1.6444588	-0.42551613	-0.5964942	0.51062727	1.222168	0.4127531	0.17133236
A_24_P365526	-0.018876553	-0.36752224	-0.15858269	0.9866009	-1.4314013	0.33144617	-0.020187855	0.08713007	0.24744844	-0.7653341	-1.1924696	-0.20357037	0.056345463	0.9923105	0.08655071	0.018876553
A_23_P51587	0.002620697	0.45655727	-0.07558775	-0.7794881	2.4629736	0.18123579	0.7001486	-0.12482405	-0.002620697	-0.30737305	0.072371006	-0.005738735	1.2023511	-0.4016137	0.2125721	-0.31719065
A_23_P85800	-0.11716294	-0.66802526	-0.44623303	-0.7059138	-2.6380332	0.61610866	0.76306605	1.0980718	0.77930903	-0.05095887	1.1950328	0.6723659	-2.712989	0.05095887	-1.2474201	0.9118755
A_32_P56497	-0.34390116	-0.73805285	0.58013487	-0.12519884	0.4035287	-0.21162558	-0.86612654	0.013037205	-0.73177814	0.18778753	-0.013037205	0.24090815	1.2912059	0.019434929	-0.97427654	0.4790082
A_23_P306223	-0.112745285	-0.056364536	0.3485179	2.6907454	0.36761904	-0.14195967	-0.050659657	0.54849243	-0.7321377	-0.2122364	-0.28562784	-0.39237547	1.035317	1.1060481	0.49076414	0.05065918
A_24_P915049	-0.82494736	-0.16850996	0.20362473	2.3032842	0.8245349	0.12236023	-0.01696968	-3.1523218	-0.27185202	0.016970158	0.13342333	-1.5238657	1.6642137	0.03499508	-0.070118904	-0.48631525
A_23_P391607	0.20589066	-0.19272041	0.09680462	0.23848152	1.5227699	-0.6785507	-0.24332714	0.2801094	-0.18466854	-0.35471153	0.50167847	-0.19701004	0.8078375	-0.079395294	-0.6513896	0.079395294
A_23_P161331	0.27134514	-0.09649658	2.48178	2.7137814	-0.48202515	0.014595032	-0.058955193	-0.07630539	-0.11046028	-0.1158638	-0.52253056	-0.014594078	1.0817728	0.9192352	0.83174706	0.47698212
A_23_P41227	-0.50320673	-0.34551	0.42424345	-0.049821377	1.8045564	0.017790318	-0.07113123	-0.20223188	-0.017790318	-0.044845104	0.25713205	0.04481554	1.1703057	-0.6141143	0.8660121	0.14020395
A_24_P362805	-0.14715338	-0.8397641	0.4928546	0.23871946	-0.17583847	-0.40887117	-0.077077866	0.21915913	-0.6821356	-0.27350378	0.30574512	0.49706268	-0.40462637	0.42395878	0.07707739	0.52695656
A_23_P13359	0.54396296	0.10136652	-0.40567827	0.2731948	0.79362726	-0.2574954	0.05347967	0.30992746	-0.25886583	0.040933132	0.51320314	-0.09969568	-0.061144352	-0.040933132	-0.5026231	-0.43261862
A_23_P325339	0.3571949	0.22082424	1.4278493	1.1314034	0.948297	-1.0556946	-1.4415178	0.07257366	-0.66759014	-0.07257414	1.6881771	-1.1093664	-0.2641735	-0.43562555	-0.4341812	0.3849392
A_23_P252276	-0.46317816	0.5808239	0.23739958	0.82154083	-0.07755041	-0.2640047	-0.7902603	0.07755089	-2.22577	-2.65934	-1.779675	-1.1374903	1.6138372	0.91136456	0.8161311	0.654171
A_24_P817610	0.0592885	1.1142812	0.38506556	1.9180188	-0.6117978	0.20326662	-0.6249051	-0.6281886	-1.2615199	-0.6141238	-1.0577817	-0.5333743	0.5669093	0.39125538	1.9598823	-0.0592885
A_32_P91663	-0.11515427	0.5862241	-0.091747284	1.5588636	-0.75770855	0.6182308	-0.47795296	-0.13390064	0.09174633	-0.45717907	-0.90561676	-0.37871552	0.72030544	3.299726	2.0723705	1.2220535
A_24_P204414	0.5078964	0.4275322	-0.051272392	0.5524473	0.34485054	-0.510602	-0.28465843	-0.01116848	-0.60709	-0.21069813	0.01116848	0.08450413	0.27284145	0.21088886	-0.069945335	-0.3447075
A_24_P932646	-0.11377144	-0.45159912	-0.08891106	-0.25901127	0.6245508	-0.34074402	-0.48544312	0.964098	0.8294916	-0.14582157	0.34381485	-0.37116623	1.7654123	0.54290533	0.4505129	0.08891153
A_23_P121144	0.24026299	-0.094818115	0.26606083	0.10078621	-0.52303123	0.014196396	-0.13599014	-0.13922215	-0.7466345	-0.086936	-0.547966	-0.01419735	1.078598	0.89569426	1.0012879	0.44045734
A_32_P138557	0.3314743	0.67465496	0.7077894	0.2711134	0.51199913	-0.13156796	-0.38369465	0.28262234	0.08809662	-0.3447714	0.46771812	-0.54799366	-0.14171696	-0.54781294	-0.10781574	-0.08809662
A_23_P79591	-0.71139574	0.038500786	-0.08478069	-0.20078754	-0.6831999	0.42551756	0.24998856	-0.038500786	0.06609106	-0.048534393	-0.36400223	-0.1279254	0.2711587	0.21622038	0.4448905	0.4543438
A_24_P348779	0.17550278	-0.1519413	0.20499802	0.050418854	2.3567014	-0.050418854	-0.21469688	-0.22087479	-0.8048172	-0.13966179	-0.6102905	-0.0707798	3.795958	0.82471466	1.589509	0.36664343
A_24_P814749	-0.45016003	-0.16571236	0.19279003	-0.14856195	-3.6875849	-0.45525455	-0.11240339	0.40502834	0.24406576	0.24127674	0.62601566	0.21644783	-2.3451195	0.11240387	-0.94509125	0.5896745
A_23_P99080	-0.2804942	1.4180546	0.23309517	0.27110004	-0.29529572	0.53596973	0.122251034	-0.12225151	0.39691687	-0.68118	-1.1217403	-2.1963825	0.48254156	0.27026367	-0.6451793	-0.50608444
A_23_P129916	-0.2911377	-0.6115961	-0.2571497	-0.40513706	-0.9431362	1.1274891	-0.6955519	-0.67811775	1.1795726	0.08079815	0.7499771	-0.080798626	0.6809454	0.34845352	0.25234032	0.20299721
A_24_P97465	0.07442951	0.06321955	-0.47286797	0.6159849	0.23077297	0.03465748	-0.25892925	-0.17954731	-0.8112116	-0.9685321	-1.1259813	-1.107976	1.094954	0.80126095	0.6390157	-0.03465748
A_24_P713119	0.16746902	-0.14405441	0.2086668	0.06389141	-0.6255598	1.2593241	-0.2569332	-0.2747383	-0.7971096	-0.10951996	-0.61222076	-0.06389141	0.98661137	0.7900348	1.133832	0.32598305
A_23_P137837	-0.29971576	-0.38163352	0.23233104	0.28343797	-0.9293077	0.088624716	-0.22108626	-0.17831826	-1.0974824	-0.41487336	0.49999785	0.18269467	0.6671717	0.97174	0.47979045	-0.088624716
A_23_P402892	-0.0017871857	1.1200819	-0.32833862	-0.80224895	4.1171837	0.0017871857	0.59402084	-0.08160496	0.9720583	-0.9965849	-0.11758518	-0.93083954	3.6610284	1.6238694	1.6131344	-0.3861227
A_23_P45396	0.17908859	0.4895048	-0.3705101	-0.07801342	-0.92937946	0.11367035	0.033828735	-0.16542149	0.26962662	-0.10591507	0.052843094	0.037921906	-1.1035061	-0.033828735	-0.28648663	0.07274532
A_23_P32847	-0.3511448	0.30293798	0.09437895	-0.008739471	-1.6738391	0.1947689	0.35884523	-0.17461061	0.008738995	-0.35589504	-0.390265	-0.32733536	-0.5185919	0.01745081	1.2176352	0.36993122
A_23_P84555	-0.035371304	-0.0057849884	-0.48472166	0.17395782	1.3324103	0.416533	0.16399384	0.0057854652	-0.043356895	-0.50209093	-1.3666677	-1.6956801	1.0966382	0.49865818	0.5730095	-0.09350109
A_23_P351320	0.5098443	-0.30155134	0.48137903	0.6167102	0.15693712	-0.051080227	0.025996685	-0.025996685	-0.054907322	-0.10563803	0.6124759	0.7906966	-0.060410976	-0.22509336	0.5757804	-0.049348354
A_23_P108922	-0.28671098	0.37417006	-0.4814651	-0.03383994	0.89093804	1.2765439	0.9465411	0.03383994	0.57209134	-0.30546498	-0.33833194	-0.098539114	0.39423537	-0.3187058	0.97386384	-0.23562026
A_32_P21794	0.011106491	0.159935	0.27894688	0.34349966	-0.011106968	-0.3899827	-0.70052195	-0.92698145	-0.72203255	-0.9474149	-0.5619216	-0.58239317	0.41579485	0.74247074	0.35958672	0.13124418
A_32_P147678	-0.272511	0.4775443	-0.063551426	0.28981256	-2.9877143	0.063551426	-0.082086086	-0.29127932	0.4319148	0.34533072	-0.41061544	0.28405142	-1.7709866	0.35961103	0.20565939	-0.32283926
A_23_P409945	-0.018752098	-0.50502396	0.29624844	-0.13330173	0.27141476	-0.106529236	0.20427608	0.12687778	-0.34868145	0.018752098	0.18868637	0.18440914	0.25373554	-0.21475697	-0.38345623	-0.12390041
A_24_P119783	-0.8511634	-1.3109198	-0.05925989	-2.2534475	-0.944438	0.8919592	0.06947422	-0.18122292	-0.45286703	0.45139456	0.1730156	0.30870008	0.88390255	0.6205263	-0.43185234	0.05925989
A_32_P196843	-0.05560732	-0.2172575	0.9495907	-0.5993962	-3.6556063	0.9164829	0.92411566	0.17520094	0.05560732	-0.233675	0.73980904	-0.21261168	-2.0429668	-0.53663254	0.24080467	0.6274266
A_24_P514814	0.25482655	-0.029704094	0.32113647	0.16295147	-0.1190424	-0.034231186	-0.24442959	-0.27723598	-0.68225765	-0.039875984	-0.5152979	0.029704094	1.0002422	0.7975359	0.69520235	0.3238678
A_23_P58359	-0.59637594	0.8869338	-0.41515064	-0.15918112	7.5031943	0.1440239	-1.1017232	0.1750822	-0.82193995	-0.7855277	0.2412467	-0.1440239	6.3881106	0.9726224	1.1216259	-0.53492594
A_32_P389619	-0.110170364	0.11016989	-0.6447773	0.16702461	2.3704462	0.413898	-0.26615238	-0.42504263	-0.78311205	-2.0862198	-1.581893	-2.4128532	1.3041043	0.7217803	0.55447435	0.12618971
A_24_P599225	-1.0637693	-0.8722019	0.24240732	-0.60909414	0.48457146	0.7413225	0.012927055	-0.41348124	-1.0154943	0.3524456	-0.012927055	0.30208588	2.425437	0.6916342	-0.041573524	-0.39505243
A_24_P932632	-0.09471321	0.20894909	-0.3043928	-0.2885971	-1.7520876	0.07630348	0.3088169	0.05308056	0.1860199	0.20642376	0.48084545	0.7045536	-2.3694725	-0.09505749	-0.32724857	-0.05308056
A_23_P401568	0.31866074	0.5109682	0.019536972	0.07877636	-0.6274662	0.015223503	0.16791058	-0.2277832	-0.015223503	-0.6534271	0.15143204	-0.7297087	-1.3848753	-0.91377735	0.043491364	-1.0180311
A_32_P13936	0.161726	-0.11073494	0.23826122	0.06973171	-0.74992466	-0.15627861	-0.37608528	-0.40673637	0.9767046	-0.1413765	-0.60539246	-0.06973171	0.8627391	0.661376	0.5581436	0.18401241
A_24_P352388	-0.26140976	-0.37855244	-0.18341827	-0.35373497	-0.12741804	0.3420267	0.5812144	-0.56641483	1.1508169	-0.14934444	0.46840668	-0.49447918	1.5645785	0.23113203	0.12741852	0.50949955
A_23_P201059	0.5212071	0.044316053	-0.97361636	0.29729533	-0.55419326	1.4546025	1.469701	0.43472648	1.0428116	-0.044316053	-0.242728	-1.4208839	-1.8145807	-0.9358151	0.5824907	-1.6672089
A_23_P2683	-0.15806675	-0.1821661	-0.3968563	-0.5375967	-1.1467342	0.74909115	0.9442549	0.24639702	0.21823215	0.26465225	0.28477192	0.2755661	-1.0774231	-0.36248398	-0.089081764	0.089081764
A_23_P167182	0.24059582	0.82788944	0.2608962	0.58130455	-5.8345594	0.14450026	0.05892515	-0.58763695	-0.0602417	-0.05892515	0.4189949	-0.3886919	-4.353219	-1.0928478	0.3959689	-0.13723564
A_32_P77328	0.1131382	-0.15065384	0.19687748	0.019821167	1.1430821	-0.22922897	-0.019820213	-0.4821005	-0.8049145	-0.19983673	-0.24634361	-0.12749481	1.8664293	1.1131668	0.48008347	0.94629765
A_24_P933319	-1.0984535	-0.69486713	-0.19938087	-0.5306854	0.52006054	0.44564342	0.13729858	0.44092083	0.6097803	0.033779144	-0.40328407	-0.033779144	0.6246815	-0.3630085	-0.49747753	0.33447456
A_32_P203066	0.062820435	-0.19790077	0.14881134	-0.03103447	-0.9040184	1.6795373	-0.52133465	-0.38881874	0.36152744	-0.2543726	-0.7039013	-0.15442944	1.7465458	1.1163349	1.541945	0.03103447
A_23_P337899	0.60700655	0.0686388	0.2507038	0.41928577	0.03081274	-0.5781355	-1.6257086	-0.7495308	-1.7846837	-1.2994456	-3.1519432	-2.6323996	1.4393106	1.0252323	0.636744	-0.030812263
A_23_P163647	0.08321142	0.1368413	0.49635744	0.34182787	-0.8878913	-0.5873294	-0.7280364	-0.4668212	-0.08321142	0.104635715	-0.38340902	0.4433694	-0.4824729	0.40416574	-0.17672205	0.2826333
A_23_P257087	-0.00800705	-0.2646761	0.08145332	-0.10280609	0.026662827	0.1553731	0.5075674	-0.6264553	-0.91877556	-0.3316059	-0.77547073	-0.260252	0.6155205	1.0841007	0.42916584	0.00800705
A_23_P111132	0.064596176	-0.4672985	-0.120957375	0.01132679	0.36713886	0.3703804	0.23933029	0.07214069	-0.01132679	0.5411644	-0.22910404	-0.044340134	0.5678005	-0.05077076	-0.021882057	-0.3942957
A_24_P274270	-0.4142995	0.50787497	0.24072695	-0.3818984	3.6159434	0.22299433	0.32874346	-0.44540167	0.22408724	-0.0823102	-0.40957975	-0.55814695	2.7049546	-0.5332532	-0.1745286	0.0823102
A_23_P118095	0.009404182	0.132236	0.3445363	0.5816221	-0.43181038	-0.13635874	-0.41875696	-0.009404182	-0.6646366	-1.2452359	-0.82611704	-0.71314716	1.5465698	1.9058466	0.73699284	1.2337542
A_24_P933291	0.23489189	-0.018147469	0.32855415	0.13885784	-0.783864	-0.14501476	-0.39310837	0.018146515	-0.670207	-0.09659386	-0.5343609	-0.027319908	0.8296237	0.6419945	0.5335274	0.1556921
A_24_P35228	-0.38215494	-0.42609262	-0.59808254	-0.25017023	-7.705894	0.73779154	0.5700774	0.456079	-0.042867184	0.43971205	0.042867184	-0.22442198	-6.092609	0.30138063	0.9311271	0.36141062
A_23_P62081	-0.38813066	-0.36231852	0.09228277	-0.23842001	-1.6933608	0.12670755	0.06718874	0.5862193	-0.06718874	0.586823	-0.49231386	0.8333478	-0.8721881	0.40919733	0.071083546	-0.17146349
A_32_P27144	0.04812622	0.66973495	0.9487581	-0.04905796	-0.9895601	0.5291338	-0.5968952	0.80106926	-0.8527727	-0.28834724	-0.7234554	-0.22139072	0.62309647	0.43983078	0.3289194	-0.048125267
A_32_P19019	-0.044301987	0.09312296	0.4019208	1.2944741	-0.97449684	0.044301987	-0.67512417	-0.49109602	-1.9700413	-1.399168	-0.46658325	-0.10322952	1.6663923	1.3829494	0.73961353	0.18753004
A_24_P170295	0.95113945	-0.5373306	0.51861286	0.97676945	-1.917594	-0.048036575	0.30688858	-0.08739281	-0.036005974	0.036005974	0.22161674	0.12706661	-2.0217123	-0.17486763	0.48650742	-0.25362492
A_23_P113005	-0.22930574	0.03619528	-0.1569047	-0.2029376	-2.141488	0.4729495	0.36123323	0.07040262	0.57359457	-0.11847925	-0.03619528	-0.5045209	-0.924479	0.094350815	0.044780254	0.31505728
A_23_P352494	0.18384314	-0.81622267	-0.10414219	-1.1385622	-2.328003	0.3240795	0.14678812	0.75974035	0.10414171	-0.20346498	0.7538028	-0.88368034	-2.0244703	1.3540726	-0.20900822	0.19988775
A_23_P207520	-1.4456968	-1.2806025	-0.9404745	-0.6515598	5.439969	0.3851366	-0.012620926	0.06747627	0.3645296	0.2701416	0.012620926	-0.19387913	5.3366575	0.1904726	-0.028268814	-0.23113537
A_24_P413479	-0.6921253	-0.009585381	0.3582816	0.115557194	-0.8599806	0.009585857	-0.38682938	-0.39114714	0.7004018	-1.3779383	0.21663332	-0.36462784	0.107451916	1.219233	-0.18660307	0.46980095
A_32_P148726	0.6373596	0.3366437	0.29700804	0.39337063	-0.35340548	-0.19617653	-0.119701385	-0.23234034	-0.11507368	-0.19363928	0.44758797	0.08050823	-0.64128256	0.5022335	0.5436888	-0.08050823
A_24_P212021	-0.79466534	0.6899023	-0.4670081	-0.27025986	4.4641085	-0.08982468	-0.27946472	-0.06965685	0.34898424	0.6463189	-1.5752077	-0.92765236	3.5503159	1.2258029	0.069657326	0.59732723
A_23_P389987	-0.20767546	0.073563576	0.4940672	0.41806746	-0.96969557	-0.16582537	-0.47227383	-0.2797618	0.21178055	-0.658988	0.061349392	-0.7631769	0.54209375	0.8274436	-0.061349392	0.42553997
A_32_P62469	-0.16900206	-0.49284554	-1.0683665	0.110467434	0.09422302	-0.20745897	-0.21777248	0.58334875	-1.1230516	0.24911356	0.34111023	1.2269955	-0.7670474	0.79668045	2.0495958	-0.0942235
A_32_P27041	-0.7664733	-0.82880735	0.23611498	-0.17922735	-1.3923225	0.016499043	-0.3402772	0.23483801	-0.6798854	0.3511796	-0.016499043	0.98463583	-1.193459	0.65849257	0.08212042	0.07155657
A_24_P925786	-0.05608511	-0.32435942	0.05608511	-0.16184759	0.9502759	0.78847265	0.3257537	1.276896	-0.70590925	-0.3949666	-0.09922266	-0.3014493	0.46592522	0.30512714	0.68861246	-0.18829203
A_23_P207881	7.4863434E-4	-0.31678867	0.018986702	0.38989925	-1.0349627	-7.4863434E-4	-1.4520988	-0.38658714	0.102106094	-1.502696	-0.98781395	-0.57775307	0.4104042	0.24881506	0.50412273	0.32112122
A_23_P10873	-0.66994095	0.24178505	0.73446083	-0.22442913	2.3034387	0.72584295	-0.8393831	-0.49406195	0.01303339	-1.3645439	-0.6184063	-1.2140493	3.1567287	0.9737425	-0.013032913	0.5114827
A_24_P67699	-0.40167427	0.036086082	-0.015254974	-0.24503708	-0.46724892	-0.5174742	-0.3121395	0.036956787	-0.41667938	0.11219406	-0.19756413	0.4974842	0.34770203	0.40872574	0.015254974	0.026130676
A_24_P717586	-0.07786465	1.0936956	0.24278879	0.6832881	0.3983531	0.09589481	-0.24796343	-0.88984156	0.4694333	0.05993557	-0.25847006	-0.8906331	0.28693867	-0.059936047	-0.54186106	-0.14844847
A_23_P157495	-0.56677437	-0.6581068	0.68801785	-0.09883976	2.1739197	-0.16457939	0.021371841	-0.021371841	-0.7089386	0.4413376	-0.4320984	0.091858864	3.6992102	-0.11053944	0.5327749	0.1530037
A_23_P106024	0.035381556	-0.9658196	-0.5995214	-0.2505629	1.1116755	0.6484468	0.74506974	0.95578885	0.4418652	0.13187861	0.027092218	-0.027092218	-0.03406787	-0.15929389	-0.11338687	-0.42132497
A_23_P160631	0.32946062	0.3526969	-0.51721907	0.2469945	-1.1201549	-0.20106554	0.040609837	-0.040609837	-0.30560255	0.095276356	0.43007994	0.33054495	-1.364409	0.06382513	-0.32632303	-0.29126024
A_23_P18362	-0.49843597	-0.6303196	-0.11972523	1.4515901	-5.519894	0.35616016	0.3909316	0.5174446	0.6697545	-0.28347826	0.3376603	-0.31215048	-3.9803653	-0.31571436	0.11972523	0.5571141
A_23_P151267	-0.006536007	0.2282548	0.22403002	0.27851152	1.6112399	0.099161625	-0.09086466	-0.6793456	-0.22666883	-0.005902767	-0.59841967	-0.56297064	2.4020085	-0.12132311	0.63776827	0.005902767
A_23_P160297	0.16117287	-0.15808487	0.31205368	0.17710209	-6.4604144	-0.39286995	-0.079717636	-0.26910686	-0.8254719	0.44930267	0.079717636	0.16940689	-5.917454	0.23823833	0.2712555	-0.612236
A_23_P390665	-0.5563698	-0.92457676	2.230196	2.6566296	0.029659271	-0.81440544	0.6015825	-0.0025877953	-1.0954666	-0.6237259	-1.349287	-0.84220886	0.39419746	0.9032259	0.0025877953	0.55172396
A_24_P67280	0.52490306	0.7081783	0.80509067	0.591377	-0.35621858	0.28779197	-0.2039454	-0.15220857	0.23916125	-0.17447782	-0.0739882	-0.41397023	-0.42238545	-0.16556478	0.58655906	0.0739882
A_24_P728215	-0.07689428	0.07003355	0.46813536	1.8814478	-0.16819715	-0.17512226	0.60732937	-0.07003355	-0.46081686	-0.34686327	-0.07056332	-1.6392455	1.4199529	1.3264585	1.2812891	0.78663397
A_23_P417100	-0.10967636	0.63289547	-0.08703613	2.5227685	0.808589	-0.35238075	-0.22271538	0.08703518	-1.1102104	-0.4771242	-0.90169144	-0.3861084	0.71362114	0.5454731	0.45573378	0.09845257
A_23_P93787	-0.0935173	0.21586132	-0.113529205	-0.1030674	2.074791	0.0935173	-0.49846935	-0.1387701	0.3425808	-0.26731205	-0.68657875	-0.33795738	1.6943898	0.66961765	0.35383844	0.43458366
A_23_P31073	-0.70105076	-1.3776846	0.6719303	-0.6649504	-7.4535346	-0.031669617	-0.34646225	0.2750826	0.04516697	0.21096611	-0.06683922	0.5672903	-6.12713	0.031669617	0.46746445	0.43679905
A_32_P66091	-0.047943592	0.8482647	0.047943592	0.8539891	0.794425	-0.5973296	-0.92828417	-0.83047915	-0.84671307	-1.6868396	-0.9300747	-1.0508194	1.8828082	1.0706172	0.76241827	0.4965639
A_24_P393312	-0.68450356	0.49773788	-0.16198921	-0.40208054	2.8397207	0.9113064	0.7059479	0.0012168884	1.0022583	-0.0012168884	-0.40754318	-0.24732208	1.9781017	-0.23768711	-0.2295847	0.5694418
A_23_P430852	-0.42774248	-0.51548815	-1.7657337	-0.7371702	-2.0569134	0.3064971	0.3859172	2.002716E-5	-0.086913586	0.2560277	0.3106823	0.47985744	-1.7707024	1.4211073	-2.0503998E-5	0.26553535
A_24_P914308	0.076613426	1.796102	-0.5589981	0.80618286	0.09025288	-0.59915733	-0.9525385	-0.6451092	0.45049906	-0.91546917	0.017861366	-0.8404751	0.44845104	2.4982443	-0.017861843	-0.06681919
A_32_P140211	0.24005985	-0.094986916	0.26471806	0.10033131	-0.52149105	0.014660835	-0.13439274	-0.13617516	-0.74754906	-0.08778763	-0.4830475	-0.014659882	1.0786867	0.8966975	0.8031826	0.4413376
A_23_P70328	-0.29640388	-0.6296768	-0.47811127	-0.22967625	-3.2463026	0.37458515	0.21278095	0.060173035	0.04369259	0.15711117	0.013718605	0.18707085	-2.649003	-0.0515728	0.20138454	-0.013718605
A_23_P10156	0.34333944	0.18372965	-0.40196943	0.28671122	1.2588658	-0.33136225	0.032358646	-0.020044804	-0.08725214	-0.39693594	-0.0045571327	-0.62653875	0.9287324	0.0045571327	-0.54878855	0.20460558
A_24_P282474	-0.011997223	0.6591873	-0.45858097	-0.21192455	-0.0010142326	0.5462017	0.85949945	1.0053792	0.5170555	-0.3950596	-0.10196495	-1.1908827	-0.106571674	1.0089254	0.2020607	0.0010147095
A_23_P155514	-0.52565145	0.0037050247	-0.010834217	-0.16701794	-1.4878359	-0.18690968	0.0054397583	-0.0037045479	-0.3596654	0.16458178	0.11858177	-0.6094203	0.31806087	0.74508953	0.13762808	0.10154009
A_23_P50217	0.29296017	0.10900402	0.4943943	-0.10900402	-0.73730946	0.85627365	0.30173302	-0.152874	0.78430176	0.24758148	-0.14998245	-0.527935	-0.52829456	-0.20126247	-0.25082874	0.4632492
A_24_P172685	-0.07191038	0.13857603	0.07191038	0.46302843	0.35261202	-0.17068624	-0.54481554	-0.10777426	-0.70467424	-0.60202074	-0.38028193	-0.392056	1.0639653	1.359734	0.6108861	0.7583165
A_24_P57611	-0.10799074	-0.14202547	-0.29412842	0.16312408	1.1850286	-0.42381048	-0.12306547	0.18410397	-0.95166016	-0.82459927	-0.2687378	0.10799074	1.2036281	1.1922703	0.31881237	0.46975803
A_32_P230398	0.10350704	-0.09509754	1.2638292	-0.8755622	0.21456814	0.2291894	0.095097065	0.6280055	-0.43398762	-0.20736074	-0.09684992	0.18792343	-0.39067173	-1.8920527	0.2224226	-2.3547149
A_23_P121061	-0.828742	-0.012233734	0.56325245	-0.7140794	1.723494	0.012233734	0.29106426	-0.25225735	-0.13851309	-0.33363056	0.8657088	-0.64084053	1.378099	-0.4759183	0.10213232	0.11066532
A_24_P910971	-0.9339018	-1.2453957	-0.8942375	-1.0364676	0.7597685	0.8093424	0.22081041	-0.13369083	0.13369131	-0.8054323	-0.51102304	0.1825347	1.0270696	-0.30844116	0.9224596	0.9509859
A_23_P250982	-0.08389902	0.053278446	0.0012822151	-0.22661257	-2.56527	0.18204927	0.20253992	-0.09175539	0.05856657	0.40119982	0.017351627	0.20378256	-1.8177218	-0.21897268	-0.0012822151	-0.025703907
A_23_P409723	-0.07526398	0.2209301	0.5307684	0.55730915	0.05636406	-1.499939	-0.7566366	-0.018092155	-0.17020655	-0.0141124725	-0.14326572	-1.4870644	0.99627876	1.2145767	0.772634	0.014112949
A_24_P256513	0.55047154	0.18746877	-0.08067632	0.4094956	-1.6874554	-0.8965409	0.11056733	0.5664818	-0.10973239	-0.56337285	1.7022784	0.04447913	-0.9775126	-0.04447913	-1.315357	0.63181853
A_23_P13382	-0.4803648	0.4838295	0.2616744	-0.5562	-0.010461807	0.07469225	-0.41511202	-1.0898457	0.7098584	0.010461807	-0.812376	0.11916351	-0.12338734	1.7084718	0.6882963	-1.274209
A_24_P388570	0.011406422	-0.22203398	0.14962149	-0.37700891	-0.0020775795	0.0020775795	0.086695194	-0.22510767	-0.5155616	0.14696932	0.038933277	-1.2974629	0.9507823	-0.6260152	-0.17199564	0.1083169
A_32_P155030	-0.40361834	-0.27787256	0.36379337	0.5915146	2.0939407	-0.003806591	-0.20814753	0.003806591	-1.2626252	-1.0772886	-1.0042443	-0.5132594	2.3237238	1.365416	1.4284215	0.6409359
A_23_P256334	-0.6449232	0.20282698	-0.10550022	-0.4576583	2.2163434	0.67143774	0.35068274	-0.21106291	0.19423342	-0.12301874	-0.20394468	-0.9748459	1.7712998	-0.8354287	0.10550022	0.40531778
A_23_P35082	0.87506104	0.20723724	0.5304165	1.2145147	0.6924	-0.33564568	0.077778816	-0.25264072	-0.60528946	-0.25475597	-0.020498276	0.011049271	-0.023201942	-0.011049271	0.9945259	-0.79416466
A_24_P173124	-0.12576365	0.46878552	-1.8944237	-0.48155618	1.2675984	1.0043709	1.6838381	0.81891274	0.79704785	0.062297106	0.40102506	-1.8523686	-0.062297106	-0.6404002	-0.4102738	-0.56514287
A_23_P161098	0.0034356117	0.77881527	0.34672546	0.1015563	-1.1874604	0.72256994	-0.094480515	-0.10867596	-0.0034356117	-0.29768324	0.0903697	-0.393744	-1.9165425	-0.13583183	0.056946278	0.06044531
A_23_P163850	-0.29523468	-0.76470375	0.24873447	0.54433537	-2.0670466	-0.22622395	-0.5870323	0.015435219	-0.2869835	0.25484562	-0.015435219	0.3296404	-0.8502245	0.44411182	0.08973694	0.44498253
A_23_P40785	0.3731594	0.23717403	0.1966896	0.43889236	-0.9243994	-0.7753649	-0.3711052	-0.1966896	-1.5438805	-2.0407162	-0.5012913	-1.9723492	1.1546822	1.5274477	0.4897194	0.6179848
A_24_P594683	-0.8423271	0.037368774	-1.0830612	-1.0884275	-0.0023508072	0.19723415	0.049773216	0.0023508072	-0.044585228	-0.053874016	-0.89646053	-0.1285553	0.29398537	0.42639256	0.893878	0.12608719
A_24_P261724	-0.13362598	0.91320705	-0.28979397	-0.1208334	1.0601969	0.283885	0.4098072	-0.24053383	0.65862083	-0.120737076	0.07407665	0.06579304	0.16860676	-0.3394184	-0.45140076	-0.06579304
A_24_P124567	0.2606635	-0.23189592	-0.07808685	0.45036554	-0.90687037	-0.34002924	-0.083568096	0.026584148	-0.15572691	0.015098095	0.6381936	0.54608107	0.35468054	0.24178028	-0.24021912	-0.015098095
A_32_P169521	-0.0060310364	0.1704092	0.61286545	0.6916208	-0.77716684	0.0060310364	-0.47254086	-0.22660923	-1.3115444	-1.0110917	-1.4645791	-0.40372896	1.7748976	1.632997	0.88003445	0.5907059
A_23_P341418	-0.03361845	-0.8749299	0.07875395	0.018571377	-1.7775779	0.046475887	0.03676462	0.051211834	-0.46380758	-0.018571377	0.05112219	-0.025978565	-0.829618	0.045865536	0.09323168	-0.15568018
A_23_P155316	-0.19346857	-0.22540903	0.026697636	-0.22233057	-1.2913547	-0.026697636	0.03515005	-0.16518068	-0.3393159	0.06632471	0.46775198	0.44654322	-0.2663083	0.04500723	0.32506132	0.09352827
A_23_P250813	-0.30072498	-0.46627617	0.14323807	-0.22654247	-1.840188	0.45726967	0.27252293	0.38784027	0.13189507	0.0035114288	-0.045059204	-0.0035114288	-1.5467234	-0.25618267	0.09349346	0.21886063
A_23_P85460	-0.42022705	0.3695469	-0.1845808	0.0326643	4.455946	-0.0326643	-0.53360176	-0.37893295	0.09353733	-0.7893858	-0.75293636	-0.98748016	5.616399	0.49816322	0.21941948	0.23197174
A_23_P371777	-0.2057743	-0.03685093	0.44630432	-0.033307076	-0.029245377	0.06134796	-0.025705338	-0.34299946	0.053340912	0.025705338	-0.10750961	-0.45867634	1.264575	0.9931221	0.78099155	1.0145607
A_23_P121396	0.11073494	-0.16327477	-0.29440117	0.0060014725	-1.1609192	-0.0060014725	-0.15148735	0.03785515	-0.18427372	0.2938938	0.16056442	0.117017746	-0.36784935	0.48051834	-0.012705803	0.029170036
A_24_P186746	0.45548248	0.8844271	-0.016581535	0.7625828	-2.4705563	0.016581535	-0.16264057	-0.343338	-0.20724964	-0.032408714	0.37279415	-0.082118034	-1.8489332	0.2600069	0.57908916	0.21940517
A_24_P856794	-0.25463438	-0.16307592	0.2406311	0.18456411	0.09007788	-0.011192322	-0.21237612	-0.022927761	-0.9417653	-0.32833385	0.011192799	-0.6798034	0.6395278	0.80636215	0.28336906	0.08111048
A_23_P313728	0.08895588	0.0076503754	0.08692932	-0.13210964	-0.56190586	0.48221302	0.47003174	-0.0385437	-0.0076503754	-0.035894394	0.49880314	-0.04113865	-0.3515253	-0.21058083	0.18859482	0.023179054
A_23_P34018	-0.0683794	0.19701576	-0.36282063	-0.26239586	0.4796114	-0.021960258	0.021960258	-0.07985401	-0.029273033	0.14239216	0.2546196	0.7075529	-0.11796665	0.08983898	-0.5031967	0.09093571
A_24_P84099	0.022343159	0.22110605	0.34515905	0.38657475	-0.9198642	0.6837883	-0.20601463	-0.50516224	-0.77514124	-0.396739	0.042344093	-0.029414654	0.6285939	0.96428394	-0.022343159	-0.06374979
A_23_P144929	0.85657597	-0.25486183	0.089790344	-0.089790344	0.2628355	-0.3541565	-0.5905056	-0.6079731	0.18266678	-0.31544113	-0.7633877	-0.24464512	0.63867855	0.44401264	0.4548912	0.7645073
A_24_P42517	-0.6583395	0.43547058	-0.31251907	-0.5705652	1.702302	0.11581707	0.040485382	-0.36252785	0.041433334	-0.24201965	0.023997307	-0.02854538	2.1169043	-0.37477684	-0.023997307	0.19880295
A_24_P918441	-0.7309754	-0.7245195	0.4415381	-1.0953295	3.335025	0.46476007	0.44179463	1.2207739	0.5955641	-0.009019136	0.009019136	-0.3051226	2.129359	-0.95220256	-0.027133226	-0.41088128
A_23_P42368	0.09554052	-0.1475625	-0.034811497	-0.21026087	-0.78624964	-0.20588827	0.034811497	0.054783344	-0.26714087	0.22934198	0.57022715	0.4177842	-0.24879503	0.24536657	-0.0946393	0.15782595
A_23_P43141	0.017971992	-0.08496666	-0.09115982	0.11507702	-1.0220337	0.2916584	0.24187183	0.017502785	-0.067233086	0.09010792	-0.31993103	-0.017502785	-0.7685976	-0.048211098	0.67719936	0.066132545
A_24_P890995	0.03311944	0.17433715	-0.4931209	0.31978583	-0.25991273	0.5416243	0.46094537	-0.36824298	0.18566728	-0.513252	-0.24621749	-1.1672361	-0.03311944	0.122467756	0.42236543	-0.17251706
A_23_P24192	0.78982735	0.18170261	-0.19978237	0.7894678	-1.6249447	0.124578476	0.36772442	0.044021606	-0.07820797	0.4201851	0.42181873	-0.32083225	-2.0312252	-0.052687645	-0.044021606	-0.1252613
A_23_P76961	0.017285347	0.0803833	0.4421568	-0.017285347	-1.0784712	-0.33180046	-0.24320889	0.058859825	-0.32511997	0.019648552	-0.18221855	0.39044857	-0.3452053	0.20169544	-0.2211752	0.06817722
A_23_P9209	-0.029434681	0.41814756	0.18747616	0.22265768	1.4017205	0.0242095	-0.14046574	-0.098633766	-0.18139172	-0.37581158	-0.2530737	-0.0242095	1.9796529	0.37762976	-0.24794436	0.824955
A_23_P21033	0.020814896	-0.07312393	0.18324852	-0.17294216	-2.786274	0.37603855	0.50625515	0.27281284	0.28084087	0.43177795	-0.020814896	-0.46875572	-2.2335167	-0.23472786	0.27408886	-0.24731445
A_23_P29855	-0.29391623	0.43494463	0.04435873	-0.39755106	-0.417315	0.5895982	0.60552454	-0.04435873	0.6264472	-0.0860858	0.05297327	-0.12815714	-0.6848054	-0.6072335	0.06525946	0.07880926
A_23_P161091	-0.011670589	0.1592288	0.065331936	-0.34170866	-1.4842601	0.45444918	0.32877684	0.011670589	0.23591375	-0.34150743	-0.2738166	-0.27303648	-1.5780063	-0.4545331	0.15710974	0.046973705
A_24_P347704	0.018290043	1.4528956	-0.14567327	-0.018290043	-0.7778163	0.7487645	0.7210965	-0.037055492	0.91536283	0.08715773	-0.15073061	-0.034335613	-1.5451369	-0.2456975	0.06334829	0.19910479
A_24_P463779	0.26714706	0.012937546	0.36829758	0.16804886	-0.79639626	-0.1336155	-0.40289974	-0.39800835	-0.62544346	-0.07288456	-0.5098915	-0.012938499	0.8124752	0.63831234	0.52030325	0.14748001
A_23_P153562	0.15672588	-0.100128174	0.26070738	0.056440353	0.7875438	-0.24624157	-0.5198536	-0.51541996	-0.7321243	-0.18341064	-0.6226797	-0.03151989	0.69365215	0.5230541	0.40154123	0.031520844
A_24_P169574	0.103737354	0.5617986	-1.236711	0.34355783	0.5850129	0.2253604	-0.029165745	-0.16803694	0.30571985	-0.4010911	-0.3272748	-0.16105795	-0.17563581	0.029165745	1.5904746	-0.52627707
A_24_P367326	0.4998455	1.1341782	-0.17891121	0.33939838	-1.3831034	0.3836689	0.6986332	0.06093216	0.5545759	-0.22952747	-0.06547356	-0.97276735	-0.86086845	-0.23471737	-0.06093216	0.5512428
A_23_P129443	-0.2949314	-0.11766291	0.5737858	0.2970643	-0.7455411	0.062972546	-0.62100935	-0.3027625	0.9035001	-0.3581462	0.8210459	-0.6651187	-0.018651485	0.73065996	0.018651485	1.2516999
A_23_P60306	-0.02753067	-0.31509113	0.027531624	-0.08891392	5.3678136	1.0151634	-0.042225838	-0.496562	0.05218506	-0.23932838	-0.7338886	-0.27128506	5.422865	0.6027422	0.45918846	0.070949554
A_24_P209389	0.119170666	0.22327375	-0.18117666	0.15789557	1.4730134	-0.5375438	-0.7408643	-0.035130978	-0.5726409	-0.6511674	0.4468541	0.05663538	-0.31663084	0.3218236	0.035130978	-0.6750159
A_23_P9582	0.3748622	0.44985628	0.0057616234	0.5942817	-0.24485445	-0.25881624	-0.17991018	-0.10139513	-0.12296629	0.14374113	0.354836	-0.0057616234	-0.3740325	0.5181842	-0.23419333	0.08247805
A_32_P737256	0.16077757	0.38567066	-0.21852398	-0.73985434	-0.7286377	3.2043457E-4	0.18685627	-3.209114E-4	0.55139446	-0.47535563	0.40567636	-1.2204957	-1.0417261	0.19729233	-1.3373637	0.6763668
A_32_P234294	-2.038622	-0.4769187	0.21075916	-0.16024685	0.6649747	0.16397953	0.21040297	-0.9303131	0.16024685	-0.5622921	0.66353655	-1.2085409	0.757318	0.43093348	-0.34574366	-0.2825222
A_23_P6335	-0.59530354	0.25996876	0.03383684	0.23310709	-0.1715374	0.08261967	-0.519825	-0.432415	-0.2244196	-0.15592289	-0.03383732	-0.9365773	1.0033884	0.7891817	0.4148159	0.59282875
A_23_P125265	-0.122882366	0.017589092	0.27898836	-0.07350683	-2.5601878	0.16105223	0.050407887	-0.1018424	-0.017589092	-0.059093	0.11163092	0.22763681	-2.1393886	0.2431283	-0.0447917	0.44614077
A_24_P873263	0.28968143	0.49252892	0.65794754	-0.22376823	-1.3434553	0.57836723	0.018802643	-0.04468727	1.1174669	-0.11888218	-0.018802643	-0.18342209	-1.4648242	-0.10686779	0.53951645	0.6816759
A_23_P8649	0.83974695	-0.2814784	0.8257928	0.86027384	-1.2023196	0.053415775	-0.38916826	-0.20725965	-0.16663027	-0.4634452	0.21021509	0.47810602	-1.7168612	-0.053415775	0.81419516	0.121571064
A_23_P33141	-0.023200989	0.023200989	0.24303055	0.98711777	-0.06751442	-0.303998	-0.74919605	-0.06072235	-0.15921974	0.061841965	-0.028113365	-0.55524063	1.0701962	1.5963421	0.37400484	0.77817726
A_24_P490011	-0.17416096	0.26607323	1.4353609	2.1630945	-0.20652723	-0.36689806	0.17416096	-0.25665617	0.719893	0.54334545	-1.2645121	-1.310586	0.86594677	0.7026439	-0.41709566	-0.8212595
A_24_P145268	0.007426262	-0.007426262	2.32656	2.6020985	-0.743762	-0.24625015	-0.3239584	1.3979435	-0.9960804	-0.37616825	-0.78457355	-0.2753439	0.8195243	0.6572323	0.56764984	0.21289349
A_23_P212617	-0.12208414	0.54611254	-0.2359376	0.2091012	0.0113835335	0.24761248	0.013261318	-0.318336	0.31598997	-0.19104624	-0.61019564	0.07805681	0.6449332	-0.0113835335	-0.30739355	-0.14193773
A_23_P430670	0.2403655	0.20949078	-0.013508797	0.6818824	-0.029197216	-0.05651951	-0.1886921	0.013508797	-0.022224426	-0.6288228	-0.17197752	-0.3364148	0.22450686	0.8911748	0.059336185	0.2262969
A_24_P54178	-0.1323638	-0.016005993	0.043051243	0.016005993	-0.09294176	0.765223	0.28726816	-0.12374163	0.6157689	-0.20628023	-0.43412924	-0.2965188	0.5123582	-0.19345045	0.25773764	0.5457692
A_24_P923749	0.015782833	0.35988474	0.15618181	0.4191451	-0.49087954	-0.015782833	-0.09405756	-0.25048685	-0.13735914	-0.071070194	-0.5648246	-0.34429455	0.58683014	0.8557401	0.9125962	0.48113108
A_24_P247774	-0.6572304	-1.7005157	-0.27997112	0.6050744	2.5583153	-2.112831	0.029636383	2.2032795	-0.99618244	-0.8788109	0.42713213	0.14767742	1.31845	-1.2212276	0.6208916	-0.029636383
A_23_P412789	-0.4785571	-0.8223491	-0.45674467	-0.63829374	-0.050960064	0.580565	0.050960064	0.0653348	1.2605662	-0.66457033	0.13397312	-0.7426524	0.35598707	0.18072128	0.08830404	-0.27159214
A_24_P917290	0.24437332	-0.09643364	0.26661587	0.091750145	-0.51272583	0.016626358	-0.119353294	-0.11956215	-0.74797726	-0.094350815	-0.5444851	-0.016626358	1.0808134	0.9035802	0.8106289	0.4501171
A_32_P171386	0.0012578964	-0.21613121	-0.5332346	0.96416664	4.122547	-1.0400219	-0.5703082	2.3554068	-0.25898314	-0.72213364	0.7029872	-0.0012574196	2.5751696	0.29585838	-1.6008554	0.12366533
A_32_P46238	0.14493704	0.976789	0.2045455	0.33947182	-1.4018965	-0.34703112	-0.80946827	-0.14493704	-0.8543062	-1.1139789	-0.2638259	-1.20895	0.19726992	0.68267965	0.22404766	0.28513336
A_23_P211850	-0.67854786	-1.1736088	-0.21873856	-0.8333349	-0.044053078	0.044053078	0.15085983	0.17127323	0.12084007	0.70179844	-0.18881798	0.7293682	0.76669407	0.4400692	-0.167902	-0.2735672
A_23_P210323	0.6941409	-0.028568745	0.31426096	0.8660884	-1.614635	-0.21659231	0.08283186	0.037949085	0.028568745	-0.2032876	0.27137613	-0.086197376	-2.3297806	-0.34587336	0.52329874	-0.3536353
A_24_P299210	0.079683304	0.51850176	0.33223438	1.0767446	0.022081852	-0.613256	-0.37570238	-0.7013631	-0.54106283	-0.26737118	-1.5059648	-0.9673619	1.8134604	0.40531683	1.3066444	-0.022081852
A_23_P44244	-0.493505	-0.3737321	-0.061523914	-0.21675825	-0.82901144	0.32210684	0.18227053	-0.008367062	0.17464972	0.42222357	-0.5207982	0.24081945	-0.14666319	0.018167973	0.008367062	0.13989592
A_23_P212469	-0.24445963	0.05936861	-0.05936861	-0.6257839	-2.2716722	0.73984194	0.89085627	0.29148436	0.7532506	-0.7960739	0.099030495	-0.6132922	-1.4852729	-0.22498798	0.34490108	0.7937684
A_32_P210407	-0.7364187	-1.0545931	-0.7036524	-0.15034103	0.11075449	0.79446745	0.7488632	1.0877395	0.4035368	-0.76322174	1.0263844	-0.57198715	0.09585142	-0.09585142	-0.19351578	0.43700886
A_23_P378450	-0.29213428	-0.3876152	-0.2578268	-0.3987236	-1.0729313	0.4885583	-0.7025871	0.69673014	0.7095666	0.83330154	-0.8929634	0.1185565	0.53741837	0.3445549	1.2418051	-0.11855602
A_24_P401521	-0.46409702	-0.044307232	0.64774275	0.06517744	0.6631479	-0.19767761	-1.4214869	0.044307232	-0.8629484	-0.4508934	-0.43365717	-2.1649256	0.8730025	1.007853	0.8213377	0.38732624
A_23_P64932	0.22714901	0.6318636	-0.017942429	0.19617462	-0.75969124	0.5933142	0.45472145	0.22716808	0.56942654	0.017942429	-0.5886946	-0.57352495	-1.3905001	-0.3461771	-0.38893366	-0.06019306
A_32_P96838	-1.3380563	-1.1944754	0.04454446	-0.4168117	-0.04454446	1.4123209	0.31526208	-0.20987582	-0.5611112	0.34647536	-0.22578931	0.07507491	2.0196278	0.5468056	0.13234878	-0.31691337
A_23_P153945	0.03957796	-0.721498	0.059723377	-0.17318296	-1.274343	-0.3205924	-0.34888792	-0.32838202	-0.63264227	0.1120162	-0.033697605	0.37602758	0.10324907	0.19492865	0.033697605	0.2266736
A_23_P17821	0.28004932	0.41054916	-0.077672005	-0.40396118	-5.5197144	0.08588505	0.3012619	0.18029022	0.17248917	0.25086498	0.077672005	-0.3086853	-5.436994	-0.2994604	-0.08982086	-0.5823307
A_23_P6456	0.6047282	0.19637823	-0.003270626	0.41491652	-1.6612611	-0.21951818	0.003270626	-0.03931856	-0.2820363	0.2951169	0.18334627	-0.08830023	-1.3975239	0.22817945	0.6210294	-0.32814837
A_23_P1973	0.28769016	-0.49696112	-0.64462566	0.16588116	-2.937501	0.4067359	0.29696655	-0.16588068	0.5371895	-0.29080868	-0.755929	-2.232235	-2.0985441	3.357491	0.28916264	0.32238102
A_23_P131990	-0.4430709	0.21599817	0.21439219	0.5771122	-1.6944289	0.11812544	-0.45871592	-0.0447793	-0.042623997	-0.7615938	-0.775651	-1.0606213	0.042624474	1.070694	1.3839455	1.014153
A_32_P118010	0.15745544	0.54812574	-0.25075722	1.0892076	2.344317	-0.15745497	-0.82271004	-0.26032925	-0.77235365	-1.5821152	-0.72278357	-0.40157604	1.9274855	0.44407701	0.75560856	0.40021038
A_23_P123645	0.41070318	-1.3504963	0.7560983	0.4911332	1.9537711	0.022834301	-0.21408129	-0.66747093	-0.13507318	-0.2933116	0.21667147	-0.022834301	1.1472993	-1.1167321	0.70798826	-0.70191336
A_23_P325891	0.32704687	-0.22511435	0.27393007	0.42231226	0.08787012	-0.12644625	-0.15848494	-0.31885004	-0.07412386	-0.13961267	0.32350683	0.48593187	-0.249475	-0.028626919	0.26711226	0.028626919
A_24_P310009	0.5046067	0.42574167	0.6787257	0.4234991	-1.6169033	-0.05890608	0.114854336	-0.19940424	0.05890608	-0.6911664	0.32754374	-0.7281394	-2.569356	-0.8611555	-0.35378838	0.23682404
A_24_P175460	0.008115768	0.71170807	7.658005E-4	0.30664444	-1.4149156	0.54541874	0.24362373	-0.3080635	0.98044205	-0.005578041	-0.83176994	-0.040362358	-2.3532486	-0.23443127	-7.658005E-4	0.14169502
A_23_P17065	0.24342537	-0.069182396	1.0708208	0.06683445	0.089217186	-0.12253952	-0.33142376	-0.36206722	-0.50936794	-0.13407516	-0.6143465	-0.0668354	1.6593094	0.7131243	0.9611206	0.24009132
A_24_P173746	0.26685476	0.39032984	-0.3809576	0.31885624	0.5181093	-0.27562284	-0.3979926	-0.28326178	-0.24906445	-0.579968	0.08410549	-0.08410549	0.59096956	-0.25142097	0.13519287	0.26533556
A_23_P82523	0.44738483	1.3644829	0.22073174	0.24511147	-0.50864315	0.07881117	-0.26923084	-1.2486734	0.5442686	-0.29683018	-0.597888	-0.5990572	0.29504156	0.28233242	-0.58117723	-0.078811646
A_32_P28872	0.04852724	-0.36317873	0.36732817	-0.23441553	-1.2123494	-0.23122263	0.2376771	0.20739031	-0.21417952	0.035325527	0.19631147	0.4021201	-0.53996325	-0.035325527	0.16750956	-0.13884115
A_24_P922726	0.25216866	-0.027051926	0.3200941	0.16353035	-0.6289053	-0.045051575	-0.260067	-0.29161358	-0.68142986	-0.041643143	-0.51599026	0.027050972	0.98365927	0.7814212	0.678154	0.305789
A_24_P382253	-0.14514828	-0.3036003	0.36163712	-0.03859234	-3.0023918	0.5267582	-0.19945145	-0.30217075	0.46203518	0.15865898	-0.8068409	0.03859234	-1.8276644	0.14493084	0.33657455	0.60442066
A_24_P550411	0.17823672	-0.04208541	-0.44934154	0.2578075	0.04208541	-1.7215083	-2.1029766	-0.8496196	-2.9133208	-1.8778465	0.87742496	0.19578862	0.49615407	1.9848197	-0.74354243	0.4992311
A_23_P79122	-0.068171024	0.40993547	-0.10462427	-0.015344143	2.1315036	-0.3477893	-0.41583014	-0.35828543	0.13506842	0.023505688	-0.2595172	0.3488145	2.2134757	0.13091326	0.015344143	-0.18779707
A_24_P195092	0.15954685	-0.112026215	0.2339735	0.07037163	-0.75167656	0.91419554	-0.37825203	-0.40782642	-0.76678467	-0.14037514	-0.6069088	-0.070370674	0.86121464	0.6599798	0.5562444	0.55754375
A_24_P56887	-0.05495453	-0.5362787	0.549119	0.029492378	-2.3281927	0.19183636	-0.118535995	-0.09149456	-0.36612415	0.4416523	0.048077583	0.36573505	-1.0140209	0.25624084	0.37922	-0.029492378
A_23_P258418	1.2665076	-0.5486312	-0.6082959	1.1745563	-0.126575	0.13298368	0.48175	0.4631734	-0.13717222	0.23712397	0.26489592	-0.9892831	-0.32967806	-0.045444965	0.045444965	-0.23742247
A_24_P912074	0.2404809	0.3643241	1.1021771	0.6141925	-0.79616356	0.14856386	-1.0027409	-0.35520267	-1.0969257	-1.7632036	-0.2679124	-1.6929207	1.4223361	1.1073828	0.15697193	-0.14856434
A_24_P335620	0.38682222	0.8173976	-0.067605495	0.4123931	-0.12620592	0.15172243	0.4919572	0.067605495	-0.32889795	-0.2860675	1.1140494	0.31454992	-0.9153037	-0.2639947	-0.191463	-0.18476534
A_23_P125451	0.13731003	0.7639847	0.71975803	0.47366524	-0.16270828	-0.23223495	-0.20041752	-0.788846	-0.31159687	-0.3355112	-0.19228172	-0.10568476	0.5269108	0.49432373	1.0469398	0.105685234
A_32_P91250	0.553174	0.01017189	-0.4427824	0.15648079	-0.21864414	-1.3943815	-0.6293545	0.33892822	-0.756547	-0.017017365	1.1936855	1.2579098	-0.01017189	0.86041546	-1.4437113	0.4232645
A_23_P119964	0.07704449	0.17203999	0.46335793	0.3077402	-2.9667625	0.2406578	-0.14934254	-0.35176468	0.25021172	-0.3581686	-0.49701595	-0.07704449	-2.669798	-0.22709465	0.22707748	0.1347332
A_23_P96623	0.15561247	0.2717514	0.2758875	0.25835466	-0.25084543	0.02221489	-0.7934208	-0.2742262	-1.3074446	-1.0199742	-0.68548775	-1.8483152	1.1546931	1.0568681	0.054740906	-0.022214413
A_23_P89710	0.011702538	-0.030156136	0.49968624	0.07647896	-1.6351328	0.32573795	0.13013268	-0.12160683	0.63881016	0.22934341	-1.0310955	-0.47212315	-1.4167233	-0.24689484	-0.011702538	0.8639908
A_32_P20818	0.0945673	0.7026849	0.35986137	0.6865883	-0.5062475	-0.0945673	-0.81311893	-0.3789673	-2.1290789	-2.7568583	-1.4679031	-1.6219001	1.830894	1.9350548	0.8413067	0.5053973
A_24_P48723	-0.81784153	-1.3162813	0.26218414	-1.0621929	3.1020985	-0.0020885468	-0.1638031	0.050831795	0.1201725	0.31987	-0.8326788	0.18992138	2.5643692	-0.2942829	0.0020885468	-0.250391
A_23_P151856	-0.14506102	0.09989691	-0.022639751	-0.049232006	-1.7781863	0.055469036	-0.1478858	-0.39788675	0.022639751	0.0357852	-0.28611612	0.15255499	-1.6395154	0.093630314	0.35111475	0.26097345
A_24_P304311	-0.6039629	0.4405222	0.5163646	0.3480339	0.18716335	-0.24073124	-0.18716383	-0.64903355	0.32532454	-0.9298115	-1.3719902	-0.8619118	1.760817	1.3333969	-0.29824924	0.82000875
A_32_P210106	-0.64715624	-0.60860014	0.09446335	-0.27831745	1.3510623	0.018868923	0.06080246	-0.11047506	0.70545053	-0.018868446	-0.81208277	0.32016516	0.42256308	-0.44900894	0.109597206	-0.20771742
A_32_P23525	0.09952593	-0.7692094	1.1610174	0.24919891	-4.55161	-0.11459255	-0.68249893	-0.024466515	-0.8694649	0.71072197	0.30839968	1.1907325	-1.9429502	-0.0125665665	0.15479851	0.012567043
A_23_P500251	-0.029852867	0.058559418	-0.22433567	-0.0036506653	-0.77803326	0.0036506653	0.24361324	0.010112762	-0.2629404	0.08324146	0.08525467	0.11030769	-0.39211273	-0.022603989	0.46243477	-0.05239582
A_32_P78349	-0.047239304	1.1211476	0.047239304	-0.14204884	-1.0845699	0.2495017	0.0695796	1.6655211	-0.9482994	-0.37975883	-0.81790733	-0.31466103	0.5295124	0.34552813	0.2344718	-0.1423378
A_23_P374559	-0.52635145	0.68543625	-0.18449068	0.16046047	-1.296175	0.56167746	-0.16962814	-0.028394222	0.04751396	-0.785707	-0.17887783	-0.6773348	1.1350679	1.4368062	0.028394222	0.5460658
A_32_P923734	0.23146057	-0.41015053	1.1344261	1.1223407	-0.11187363	-0.55146694	-0.8128557	0.7931671	0.38988733	-0.49391174	-0.93127155	-0.4308586	0.4058795	0.22504282	0.11187363	-0.26376915
A_23_P14193	-0.4133401	0.27053404	-0.41994143	-0.20375586	-3.2035642	0.3389144	0.5614991	-0.10347605	0.26886034	0.10347605	0.2899661	0.14067793	-3.4515057	-0.35723734	0.10791254	-0.1696887
A_23_P8363	-0.042437553	0.042437077	0.8362198	0.26598406	0.6401849	-0.7987251	-1.5204654	-1.6059246	-2.7636986	-2.205635	-2.643217	-2.1447716	2.560192	1.9212365	0.5614524	0.70786285
A_24_P462553	-0.08777952	-0.34121847	0.011608601	-0.1856265	0.3181386	-0.48664808	0.015071392	-0.011608601	0.69596434	-0.42559958	-0.3195653	-0.27689314	1.0982223	0.673933	0.16796541	0.09291029
A_23_P102681	-0.32867146	0.6538029	0.8372245	0.5637598	-0.00447464	0.4453497	-0.5989537	-1.095449	0.8863964	-0.9466667	-0.22014904	-0.23886347	1.4104323	1.3696165	-0.28688908	0.00447464
A_24_P88031	0.70756435	0.87621117	-0.21251392	0.8259897	-0.10275841	0.19060993	0.29360962	-0.25112915	0.22286415	-0.25475693	-0.49077892	-0.88854885	-0.1894517	0.021234512	0.01684761	-0.01684761
A_24_P941526	-0.05235195	-0.3120098	0.05235195	-0.15306854	-1.1246233	-0.3563385	-0.732852	-0.7293644	0.5604005	0.18315029	-0.3110428	0.6637106	0.479908	0.31163502	0.18716526	1.3354325
A_23_P134314	-0.14034939	-0.734025	0.55927944	-0.4141941	-1.0175657	-0.031352043	0.07737732	0.038868904	-0.07921314	0.31095982	0.24036884	0.49144173	-0.27145576	0.031352043	-0.6406002	0.35031986
A_23_P13048	-0.23418808	0.06939316	0.24217129	0.29793453	0.43909073	-0.06939316	-0.66698647	-0.5073738	-0.7893934	-0.68150616	-0.8307619	-0.36581993	1.5058441	1.1594286	0.5111561	0.24190521
A_23_P98565	-0.054644585	-0.32259083	0.054644585	-0.1587944	-1.1278429	0.36112928	-0.7408285	-0.7432909	0.057422638	-0.38950634	0.2636013	-0.33991718	0.4692979	0.30704308	0.17520237	0.3733139
A_32_P144381	-0.37559223	0.54913855	0.63033867	0.6966934	-0.13168669	0.45230246	-0.4567232	-0.22776222	-0.46973753	-1.462069	-0.80479	-0.44902897	1.3052592	1.1068554	0.44958782	0.13168669
A_24_P325533	0.11255646	0.23725319	-0.021370888	0.8302407	-0.54917145	-0.13295078	-0.71818113	-0.06933403	-0.019001484	0.33041096	0.019001484	0.2175579	0.08901262	0.40553093	-0.4301715	-0.29066944
A_24_P38702	-0.1111958	0.2426846	0.2574613	0.04591489	1.5598147	0.06422305	-0.5552652	-0.02142024	-0.26630712	-0.5309689	0.02142024	-0.033875227	1.5128877	0.49929976	-0.16542602	-0.23841166
A_23_P47616	-0.30754757	0.45260477	-0.0120100975	1.4278836	0.08449793	0.66966534	-0.39497042	0.10492563	0.0120100975	-0.51139545	-0.28268766	-0.054621696	0.6004572	0.47274733	-0.5616565	-0.39627838
A_23_P132760	-0.075312614	0.07105303	0.04613352	-0.9637699	-0.6632457	1.2508807	0.3178482	0.37431574	0.73399305	0.09650421	-0.37397528	2.06885	-1.7751713	-0.046133995	-0.8925352	-0.542573
A_24_P190007	-0.46931505	0.19568062	0.18167782	-0.18167734	-1.5252609	0.2298007	-0.8211975	0.6593447	-0.7224207	-1.5745211	-1.411067	-0.24878883	0.5771618	2.0252404	0.5224123	1.226645
A_23_P140907	0.39886284	-0.1569767	-0.17878056	0.33769035	1.0739346	-0.17426205	0.06916523	0.02822113	-0.116809845	-0.07972336	0.3438444	-0.02822113	0.6437702	0.058716774	-0.36573505	-0.071341515
A_24_P100650	-0.7194853	1.0063	-0.24931479	-0.13052559	-0.053544044	0.053544044	-1.397563	0.06408882	0.69290113	-0.3520713	-0.287467	-0.9933214	0.8184223	1.1575027	0.39395332	0.2634244
A_24_P319613	-0.47628784	-0.008167267	-0.069441795	-0.13727379	-4.882594	0.10783577	0.2232418	-0.40167332	0.23866177	0.27583885	0.05203533	0.008167267	-3.5512981	-0.17400074	0.27017593	0.4156704
A_23_P149375	0.7885766	0.039378166	0.17113876	1.1320529	0.77080774	-0.48000813	-0.47310448	-0.5031748	-0.8190017	-0.2265749	0.024872303	-0.14056015	0.35802984	-0.024872303	0.045387268	-0.547688
A_32_P190769	-0.29926777	-0.66841125	-0.26742077	2.5812802	3.2267237	0.33310556	0.096847534	0.20654774	-1.1575089	-0.11184502	-1.0905437	-0.58498573	2.4159918	0.7623205	0.40855503	-0.09684801
A_23_P67932	-0.082036495	0.5915632	1.3221483	1.6191883	-0.6906929	0.02974081	-0.056680202	-0.02974081	-0.853354	-0.44653368	-0.9921589	-1.6234779	1.3972173	1.7698398	1.5291433	0.916131
A_23_P90804	-0.26233578	0.58140564	-0.28519154	-0.1277523	1.1578655	0.846508	0.80797195	-0.077858925	1.0465288	0.16111946	-0.06875801	0.084937096	-0.09329891	-0.6120157	0.06875801	-0.25028038
A_23_P102202	-0.25829554	-0.67831945	0.5048404	-0.23530817	-3.8409781	0.092867374	-0.060892582	0.027411938	-0.24127054	0.20526075	-0.027411938	0.23510885	-2.735456	0.06587362	0.10863733	0.24800825
A_23_P148768	0.28809738	0.9171877	0.93031406	1.4657917	-1.545682	-0.8351464	-1.6482468	-1.4653063	-0.2880969	-0.5864978	-0.42334747	-0.71695995	1.1571102	1.1872053	1.3308053	0.9414506
A_24_P342484	-1.3213596	0.05951214	-0.059512615	1.7441406	-0.5779495	0.2825699	0.31650782	0.10598564	-0.42761564	-1.6790867	-1.1652946	-1.5919752	0.101979256	0.75810146	0.4584546	-1.1135454
A_32_P23187	-0.21436357	0.4443345	0.51101637	0.63982725	3.2477312	-0.28774786	-0.2031827	-0.42864418	-1.7249808	-0.031341553	0.031341553	0.41583538	3.7014027	-0.74366	-0.13923311	0.10038996
A_23_P49254	-0.21287632	0.6807771	0.4234314	0.5708165	-0.63902235	-0.419652	-0.5240927	-0.097332954	-0.64444304	-0.46430635	-0.62060976	0.097332954	0.6122446	1.1471848	0.45420408	0.9497037
A_23_P259172	0.018623352	0.3159876	-0.093990326	-0.16682053	0.9452963	-0.70460033	-0.37029266	-0.018623352	-0.11900234	0.02925682	0.03836727	0.6926527	1.3043461	0.36872864	-0.75293064	-0.02276802
A_24_P298228	0.16388702	-0.05791092	-0.16873169	0.06958866	-1.7584314	-0.5129652	0.02530384	0.14193821	-0.44004822	-0.02530384	0.42775822	0.3929119	-1.6445618	0.26721478	-0.4317875	0.24817657
A_24_P307724	0.06776953	1.7169294	0.4240899	1.5606079	-0.39893436	-0.06776905	-1.6198902	-0.8225522	-1.0934105	-1.5784712	-1.6009941	-1.5042496	0.95439196	1.5163074	0.9305868	0.95007944
A_24_P586390	-0.028885841	0.71663	0.35163736	0.2488327	0.99339247	0.028885841	-0.58990526	0.3967862	-0.088730335	-0.39275646	0.30250502	-0.6196313	0.14395142	-0.68328524	-0.35270262	-0.41425896
A_24_P204976	-0.78214407	-0.040209293	-1.9466105	0.5266595	0.97682524	0.04020977	-0.5420313	0.31590462	-0.8179555	-2.2307186	-1.8012056	-0.4136896	0.9025717	0.7283783	1.2710681	0.26084042
A_23_P52031	-0.29209805	0.03336811	0.016804695	-0.25518513	1.109499	0.7403097	0.8112564	-0.031282425	0.76003456	-0.13524055	-0.49402714	-0.15148067	0.80149746	-0.6094675	-0.016804695	0.19642258
A_24_P138556	0.15129805	-0.3408208	-0.16791868	0.016010761	-2.2270455	-0.24914885	-0.016010761	-0.19742727	-0.69051313	0.15520334	0.32983255	0.14595652	-1.2277169	0.1343131	0.09798002	0.10043669
A_24_P402415	0.014730215	0.3303578	-0.2909143	-0.005281687	0.005281687	0.29391122	0.07754445	-0.6499307	0.17060304	-0.7286637	-0.41379666	-1.0761778	0.30869126	-0.28237033	0.06648803	-0.016682386
A_24_P880043	-1.0994229	-1.4116573	-0.22233295	-0.38668823	5.102073	0.35919476	-0.2898054	0.06793308	0.03357601	0.19821596	-0.41026115	0.48057938	5.4973617	-0.19669867	-0.03357601	0.3859558
A_23_P68949	-0.2738986	0.19121313	-0.34420156	-0.26131773	-0.018902302	0.8305249	0.633142	0.06209612	0.40730333	0.29872274	-0.35143232	0.018902302	-0.036494732	-0.1718936	0.9337344	-0.16058683
A_23_P85371	0.10878134	-0.5226388	0.469131	-0.226645	-1.3345628	-0.07117796	0.032322407	0.37713385	-0.62349176	0.008029461	0.27302885	0.4820323	-0.41624308	0.084575176	-0.008029461	-0.23583937
A_24_P303480	-0.07151389	0.12776017	-0.24370503	-0.020554781	4.0846863	-0.25033736	-0.2543156	0.020554781	-0.33344817	0.2694428	0.12744546	-0.1979649	5.076253	0.2711308	-0.19277787	0.06564784
A_24_P340800	0.012207508	0.081056595	-0.44644928	0.24357176	0.7867961	-0.30816793	-0.437747	-0.18629551	-0.4704604	-0.33684063	0.51767635	-0.012207508	0.59872913	-1.1282582	0.1441431	0.10259342
A_24_P254346	-0.32460833	0.50444174	-0.200418	-0.29281473	0.5684886	0.04439497	0.023536205	-0.18936205	0.35827303	-0.1819644	-0.43182993	0.14571524	0.6175618	-0.023536205	-0.03622389	0.1919694
A_24_P402222	-0.012408733	0.0124082565	-0.053654194	0.57231903	0.121192455	-0.4104247	-0.4110012	0.41509438	-0.18231487	-0.28338146	-0.13300467	0.11980009	0.7448821	0.6436219	-0.12270641	0.34656858
A_23_P41424	-0.24213314	0.004386902	0.9233475	-0.03508091	-1.4283514	0.853673	0.5488472	-0.25131607	-0.004386902	0.27823448	0.39850807	-0.082725525	-0.65314674	-0.035695076	0.9291506	0.39421558
A_23_P86884	0.36147165	0.0075507164	-0.38573503	0.5335336	0.33015585	-0.0068182945	0.056280613	-0.23760271	-0.06420374	0.0068182945	0.13582659	-0.28794622	-0.44104338	-0.31515837	0.17350054	-0.35937452
A_32_P64936	0.071425915	-0.4731288	0.22915697	0.5653205	-0.13895178	-0.018193722	-0.38644648	-0.32899618	-1.120563	0.018193722	0.06408739	0.56743383	0.99764013	2.0681567	-0.059247017	-0.16913033
A_24_P861099	0.07083416	-0.26934433	0.7315998	-0.7332907	-2.8226218	0.26411438	0.41009617	1.1488705	-0.07083416	0.8506136	0.10835457	-0.23418427	-2.2330317	0.09252834	-0.1319747	-0.29552698
A_23_P8175	-0.5293579	0.2679448	-1.2451153	-0.26050997	4.95339	0.40780258	0.17789459	0.06529522	-0.06529522	-0.44374752	-1.1364098	0.2061696	4.106904	-0.32791853	0.3904047	-0.6128454
A_23_P145	0.20018435	0.13271284	-0.34577703	0.24861288	1.8680348	-0.364758	-0.17514658	0.017307758	-0.048692226	-0.017307758	-0.09112406	0.08625555	1.6634822	0.021448612	-0.5731859	-0.046530247
A_23_P27096	0.2788005	1.1014571	-0.33144426	0.22938585	1.7402854	-0.020685673	0.22151613	-0.14837503	-0.029429913	-0.2773385	0.020685673	-0.1361804	0.9036622	0.27713442	-0.15974092	-0.1165328
A_24_P570049	-0.7857375	-0.78154516	0.11513996	-0.15258217	2.8486495	-0.088190556	-0.18250561	-0.11000395	0.3567462	-0.36538887	-0.7073231	0.3270502	2.8116117	0.12338829	0.8960471	0.088190556
A_23_P209619	-0.40715265	-0.24569845	-0.32719374	-0.596025	-1.9193053	0.47710466	0.30059195	0.32159185	0.2502799	0.15697908	0.13424826	0.4513278	-1.9331212	-0.13424826	0.37634993	-0.23993826
A_32_P131640	4.0712714	-2.2549648	1.6517358	4.0954804	-3.90173	-2.1484542	-2.3143363	4.497541	-2.9025578	1.8546033	2.3453794	3.9404159	-3.2233639	-2.2401671	-1.6517358	4.186065
A_23_P70849	0.39963913	0.16191435	0.41849947	0.43523598	-1.1066318	-0.5807576	-0.7980375	0.021021366	0.05627346	-0.28100872	0.18767166	-0.26016617	-0.44944572	0.5065484	-0.021021366	-0.075047016
A_24_P400702	-0.3797679	-0.04652691	0.63596964	0.34403992	-0.43848372	0.23568821	-0.6385951	-0.14753723	0.43631554	-0.2265377	0.20382595	-0.81833076	0.9498787	0.04652691	0.27371693	-0.55332184
A_32_P103220	-0.1341412	-0.035217524	0.21086049	0.0905931	0.73762107	-0.6832912	-0.26580548	-0.047948122	-0.7093365	-0.36232972	0.2671535	0.129812	1.3691108	0.22905183	-0.44696307	0.035217524
A_24_P29595	0.16268182	0.7288039	-0.07442117	-0.49365354	3.6514647	-0.10434556	0.2262013	-0.01428771	0.025817156	-0.6228893	0.14717746	-0.3306024	2.8367417	-0.59625125	-0.0951612	0.01428771
A_23_P25305	-0.77135515	0.3497553	0.19544125	0.35620737	-0.4421277	0.4230919	-0.6942992	-0.0430336	-0.2888608	-0.36365414	-0.7167916	-0.5904236	0.7297721	0.946249	0.0430336	0.18040085
A_32_P41604	0.2503996	-0.023364067	0.32172775	0.16301918	-0.6491041	-0.058192253	-0.27746677	-0.307868	-0.678586	-0.04537487	-0.5162201	0.023364067	0.9637661	0.7620659	0.6581416	0.28450966
A_24_P7584	0.093575954	1.4776044	1.1044707	0.35248375	0.28958654	1.1738496	-0.2606554	-0.9500904	-0.059522152	-0.43135166	0.67497873	-2.4720383	0.059522152	-0.8636522	-0.88471127	-0.34281015
A_23_P160537	-0.6053567	-0.013877392	0.27478266	-0.44629622	-5.5397835	0.5663943	0.55508566	0.013877392	0.6424737	0.4019971	-0.43827868	-0.5714812	-4.9474406	-0.32129622	0.28035212	0.15947008
A_24_P919629	-0.23732853	-0.5056906	-0.16126728	-0.32551098	0.047581196	0.3613491	-0.78474045	0.2711935	0.13443851	-0.5381994	-0.04758072	-0.46894646	0.4531536	0.9303589	0.14835644	1.3950438
A_32_P217271	0.29994726	-0.998528	0.66585016	-0.039129734	1.2905879	0.039129734	-0.8405528	-0.17303562	0.95558023	-1.0347409	0.56630373	-0.965281	3.8883195	2.717599	-0.35349798	-0.7287555
A_24_P153558	0.15763855	-2.7608871E-4	0.40373468	-0.32054234	-0.27232027	-0.14618015	2.7608871E-4	1.6744013	-0.39416504	0.116499424	0.34307098	-0.13295937	-1.1663771	0.24025631	0.5892639	-0.15085888
A_24_P165595	-0.20393276	0.6637182	-0.18023491	-0.021988869	-1.1307011	0.43812656	0.30516815	-0.2962618	0.11396885	-0.17399693	0.021988869	0.53348255	-0.9744177	-0.16429234	0.45835114	0.20645618
A_24_P212605	-0.25600815	0.01020813	-0.01020813	-0.29798508	-0.95601845	-0.712554	-0.43749237	0.20473003	-0.0728426	0.61985683	0.035305023	0.6755686	-0.3454628	0.72260857	0.12386036	0.2950859
A_23_P87860	-0.40226078	0.28110743	1.4750929	-0.4922285	-0.5069113	0.9077234	0.062342644	0.19139099	0.94528866	-0.71319294	-0.802331	-0.6438284	0.24964237	0.052681923	-0.052681923	-0.4293146
ETG09_48764	0.069711685	0.37103462	0.17703438	0.28521538	-0.6158962	-0.06971264	-0.15424347	-0.30403137	-0.37520885	-0.18448734	-0.59440994	-0.1361208	1.0943508	1.0441499	0.57547474	0.29571724
A_23_P122216	-1.1192536	0.14773369	-0.8784113	-0.68530893	8.43014	0.84703684	0.0550704	0.06564665	-0.31544542	0.14261055	-0.5422616	-0.5291195	8.29267	-0.055069923	0.27019167	-0.13680363
A_24_P76995	0.31526947	-0.26454782	0.68311405	0.48048353	0.06582117	-0.5440378	-0.37904072	0.11399412	-0.065820694	-0.42350245	0.17137289	-0.14199305	-0.86486006	-0.11561489	0.83953524	0.29070902
A_24_P225189	-8.559227E-4	0.30442333	8.559227E-4	0.03760481	0.00946331	0.29040432	0.26554918	-0.39339638	0.20803022	0.065662384	-0.046101093	-0.54781866	-0.42468548	-0.2266798	-0.10446882	-0.48784018
A_23_P148422	0.2645154	0.4026146	-0.78229713	0.21404934	-5.6535206	0.15587187	-0.036648273	-0.30284405	-0.23708582	-0.29468536	0.09060097	0.0016999245	-4.038459	0.073755264	0.12768793	-0.0016999245
A_23_P48581	-0.34798193	-0.35941267	0.21088266	-0.62950563	-0.020894527	-0.06539583	-0.06455469	0.051526546	0.34854174	0.38390684	0.010638714	0.32534552	0.39657545	-0.010638714	-0.24169302	0.2802701
A_23_P24269	-0.20948887	0.43366146	-0.1632309	-0.54271126	-0.072434425	0.67402077	0.36965942	0.072434425	0.55442905	0.30349255	-0.40369987	0.43711567	-0.3185501	-0.20900297	0.32359076	-0.26646805
A_23_P336838	0.26608276	1.717629	-0.26608276	0.7352905	-1.3782673	0.5547838	-0.79625607	-0.9915409	-0.6469593	-0.6834059	-1.1251965	-0.61730576	0.5372615	1.4983568	1.1770134	0.45511436
A_24_P930927	-0.23328304	-0.39876986	0.56455135	-0.25266695	0.9654126	-0.339859	-4.2509212	-0.04685068	-0.40771294	0.14783621	-0.4945035	0.04685068	2.2450395	0.068630695	0.08182049	0.06757593
A_32_P56874	0.08621955	0.20704532	0.44327283	0.25709176	1.2960961	-0.12499547	-0.102647066	-0.08621955	-0.7073381	-1.0524576	-0.8536656	-1.3903005	0.9489324	0.23630452	0.53292966	-0.31581283
A_23_P303149	-0.045133114	-0.19591379	0.0069942474	0.1345377	-6.00529	-0.15235758	-0.0069942474	0.22887754	0.38468266	-0.014773846	0.1726532	0.32437515	-4.3906236	0.25705767	-0.37806845	0.22350693
A_24_P181583	-0.014388561	-0.50421333	0.17372799	0.014388084	1.3788309	0.49572706	0.07874966	0.11379528	0.38038683	-1.6564522	-0.70950127	-1.5938082	0.47528934	-0.52767086	-1.0500946	-1.4260445
A_23_P7282	0.038794518	-0.6700802	0.20994854	-0.13597965	-1.2201786	0.37875938	0.07829094	0.08607674	-0.060459137	0.4912691	-0.038794518	0.47137737	-0.7869196	-0.15829945	0.22213364	-0.1992445
A_24_P24444	0.033077717	0.67939043	0.23304176	0.27224112	0.31167507	-0.35135603	-0.614347	-0.5511255	-0.03307724	-1.0659275	-0.57018185	-0.41023827	0.45446587	0.13455153	0.24016523	-0.16646385
A_32_P503015	-0.8569865	-1.4958897	-0.13195086	-0.5515375	-0.90605783	1.0992408	0.3125558	0.13195133	-0.73632	0.36699152	0.43001938	0.80245733	0.8009114	1.0276871	-0.57087946	-0.38065434
A_23_P96302	-0.07950497	-0.83491325	-0.03937292	0.64600277	2.8127537	0.6615653	0.8155303	-0.20389843	-0.083702564	-0.9172373	0.89659405	0.039372444	2.642964	0.52486324	-0.32715797	-0.26692486
A_23_P92809	-0.58373404	0.10546589	1.22577	0.72316456	-0.7502012	0.025443554	0.1660881	0.07085323	0.14241266	-0.3274088	-0.81784916	-0.43001842	-0.85633755	1.384738	-0.025443077	-0.070132256
A_24_P5743	0.57034683	0.050175667	0.09313488	0.61078453	-0.7173948	-0.41974354	-0.26367092	-0.012160301	-0.20107937	0.012160301	0.42940235	-0.26915932	-1.0326405	0.43588257	-0.47427177	0.25721455
A_23_P408215	0.8570638	-7.710457E-4	7.715225E-4	0.7730284	-1.2871614	0.6480713	0.65831375	0.5261936	0.616416	-0.28106594	0.2738824	-1.9383416	-1.4963465	-0.6974788	-0.7963662	-0.88755655
A_24_P938324	0.27164078	0.011180878	0.3759575	0.17147064	-0.8011122	-0.13017082	-0.40931225	-0.40647984	-0.6138258	-0.06369305	-0.5097151	-0.011180878	0.8034072	0.932683	0.5099635	0.1434164
A_24_P927377	-0.61181927	0.5206933	1.6465244	-0.67329454	1.6409168	0.6148467	-0.26853752	0.17228031	-0.17228031	-0.4765644	0.52391005	0.6079545	-0.51969624	0.560894	-0.55716705	-0.4622569
A_32_P172864	-0.07843971	0.466197	0.30070496	0.098986626	-0.27891922	0.10167408	0.013383865	-0.38042736	0.3461666	-0.12241173	-0.6367626	-0.061878204	-0.45198345	0.17533493	0.78772736	-0.013383865
A_23_P11685	-0.37661195	0.32349324	-0.031201601	-0.55459905	2.3253858	0.5776355	0.3359592	-0.5935147	0.7093761	-0.69584155	-0.40671992	-0.5619085	1.8710482	-0.47008586	0.031201601	0.82597756
A_32_P90346	-0.056914806	0.12778711	0.6859956	0.21493006	-5.9434686	-0.072723866	0.004772663	-0.285398	0.043117046	-0.03677988	0.28341246	0.25774622	-3.96735	-0.004772663	0.008586884	-0.008579254
A_24_P461118	0.34337568	0.025815487	0.55409193	0.19047499	-0.05452013	-0.042434216	-0.13757372	-0.17815542	-0.14751959	-0.10285044	0.22588873	0.8470912	-0.6701369	-0.008115292	1.6234956	0.008115292
A_24_P164854	0.45068312	-0.36391783	-0.26944447	0.50264835	1.3284388	0.04413128	0.27075863	0.10794258	0.008413792	-0.92604494	-0.19387484	-1.4575114	1.0011773	-0.27783823	-0.0084142685	-0.41152668
A_23_P171324	-0.4290862	-0.19493675	0.8871851	-0.9761572	3.0061903	0.24198866	-0.34491205	-0.18660784	0.14465952	-0.5927324	0.45689058	0.3938532	3.533958	0.4395671	-0.8679037	-0.14465904
A_24_P84048	0.30970716	0.04413557	-0.29194307	0.26692533	-0.7562299	-1.1018271	-1.0396228	-0.04041624	-0.622087	0.04041624	0.3727088	1.015429	-0.25357485	0.81260633	-0.89427805	0.50380373
A_32_P23333	-0.18182135	-0.48584127	0.8598056	0.26085043	1.2107844	-0.56877565	-0.8607507	-0.9065404	0.54113626	-0.49181795	-0.03663683	-0.4558444	2.545745	0.6839237	0.03663683	0.16577196
A_24_P118489	0.17349362	-1.0856698	0.2892239	0.46735978	3.494664	-1.2836082	-1.2104981	-0.17325377	-1.4421613	-0.9010327	0.6534755	0.46719623	2.5299098	-0.82623124	0.17325377	-0.6810849
A_23_P138507	-0.0056152344	-0.62632275	-0.05381584	-0.11959934	-4.5590134	0.4124422	0.24545097	0.11368847	0.0056152344	0.015356064	-0.075787544	0.2716341	-3.436966	0.07130909	-0.060116768	0.38087463
A_24_P397294	-0.045725822	0.27741385	0.28193378	1.7698998	1.0323429	-0.6798935	-0.48926973	0.0457263	-0.10719919	-0.22210407	-0.38852787	-0.36397362	1.223372	0.7374978	-0.38978004	0.724669
A_24_P911718	0.5085199	0.09678149	0.35343385	1.128864	-1.5733955	-0.025514364	-0.010701418	-0.02799201	-0.39172482	0.12597251	0.010701418	0.037112474	-0.049926996	0.41856933	-0.05085683	-0.35422158
A_24_P848345	-0.59106064	-0.4794283	1.8819776	2.569666	0.4794283	-1.0428753	-1.1880779	0.9280906	-1.3857193	-1.061513	-1.6509113	-1.1433077	1.494802	0.66718674	1.0975475	0.8757782
A_32_P85273	1.1106486	-0.63370657	2.0900087	1.3500481	1.8152199	-0.81624746	-0.4476099	0.36434984	0.009198666	-0.51832056	-0.009198666	-0.6099644	0.7212348	-0.067210674	1.0162187	-0.09384394
A_24_P319635	-0.25702	0.93728256	0.013332367	-0.13715172	-0.08250141	0.13987541	0.42117214	-0.0820055	0.062488556	-0.013332367	0.18002892	-0.8498955	-0.1563654	-0.27312565	0.09894276	0.3615904
RC10	0.28479576	-0.011128426	0.31288147	0.1241436	-0.6195936	0.011129379	-0.21106243	-0.20712566	-0.69698906	-0.023403168	-0.48513985	-0.02796936	0.9901829	0.84002876	0.6932659	0.37635136
A_23_P141434	-0.1427288	0.19517708	-0.43248463	0.34776354	0.022788048	0.29832125	-0.14375973	-0.11460161	0.56086636	-0.18929958	-0.35757208	0.0039548874	-0.21760273	-0.0039548874	0.12602758	0.13621092
A_23_P75179	0.11517048	-0.2289505	0.13570023	1.116868	-0.63797	-0.115169525	-0.2404337	-0.2395668	0.41036177	-0.23168278	-0.6732702	-0.14944744	0.94826984	0.77536774	0.6816821	0.32240295
A_24_P220485	-0.72943115	-1.1503849	-0.11984062	-0.5041046	1.0694828	-0.014765739	0.16683197	0.12606716	0.014765739	0.47792435	-0.14053154	0.5073738	0.7804451	0.021093369	-0.19832706	-0.6003437
A_24_P160070	-0.6490936	-0.6177716	-1.1063447	0.43386412	-1.8830562	0.41401386	-0.024562359	0.4274273	0.48656988	0.024562359	1.0405936	-0.7410703	-0.2900691	0.92157793	1.909369	-0.11960077
A_23_P106425	0.34069228	-0.21241641	-0.3936069	0.3696258	1.0846255	-0.2278049	-0.08974099	0.056959867	-0.056959867	0.4901049	-0.15763688	-0.16076493	1.4333646	0.33959126	-0.26766133	0.13407207
A_32_P73413	-0.27117014	-0.41758442	0.98511267	-0.28887272	2.4954805	-0.3820114	-0.4673171	0.13786983	0.0023679733	-0.41735268	0.15206718	-0.0023679733	4.170207	-0.0473094	0.10930824	0.3055067
A_24_P73178	0.18016815	0.28393936	-0.70112896	-0.064391136	1.1092272	0.4399166	0.3566866	0.0038814545	-0.049734116	-0.11855602	0.13224506	-0.15998745	0.5481634	-0.23995781	-0.0038814545	-0.556962
A_24_P21044	0.2561717	0.14785051	-0.09679079	-0.102507114	-1.6790853	-0.010257244	0.08733988	0.040757656	-0.10376692	1.1618152	0.3223052	-0.13117552	-0.8613639	0.85187197	-0.23932886	0.010257244
A_23_P55107	-0.4997902	-1.3136368	0.45391273	-0.2856264	0.9864311	0.1928482	0.036369324	0.42246342	-0.06196785	0.7394676	-0.29528046	0.61769104	1.4754496	-0.30712223	-0.12161255	-0.036369324
A_23_P373819	0.11199427	0.546432	0.22886133	-0.0502038	1.4637094	-1.1169238	-0.00254488	-1.96421	-0.46414423	0.00254488	-0.15372801	0.018802166	1.1402707	-0.5381756	-0.10980654	0.52660894
A_24_P328657	0.04429531	1.196312	0.9952502	0.5447812	-1.4553275	-0.04429531	-0.0852108	-0.43623877	-0.4994774	-0.26964045	-0.52898407	-0.42928886	0.18662643	0.7349334	0.87331486	0.24676657
A_23_P120488	-0.0037660599	-0.30923748	0.5768814	0.22751331	-0.45919323	-0.03457737	-0.28630066	0.0037660599	-0.105246544	0.3045988	-0.02281475	-0.10501957	0.79795265	0.39963627	0.04586315	0.563509
A_32_P12595	-0.14702153	0.4391749	0.14702153	0.7454369	0.47648454	-0.28197026	-0.8737838	-0.61140656	-1.3440259	-1.7421882	-1.8386047	-1.5610225	1.5440891	1.4095953	0.79850364	0.6365578
A_24_P336754	0.03613615	-0.26685095	0.27982283	-0.0035281181	-0.60234785	-0.08460379	-0.17983484	0.018017292	-0.17046595	0.0063405037	0.15142488	0.28170538	-0.28704405	0.0035281181	-0.040552616	0.039357662
A_32_P20982	-0.0013365746	0.2017684	0.48727083	-0.010621548	0.5285945	0.0037016869	-0.52301264	0.059805393	0.38343668	-0.42930174	-0.25556898	-0.49512434	0.34262705	-0.21544504	-0.12037134	0.0013365746
A_23_P115407	-0.078567505	-0.002398491	-0.04463911	-0.0041565895	4.305522	-0.17084646	-0.34141684	0.016588688	0.002398491	0.07861519	-0.11933136	0.1875248	4.663581	0.31953812	-0.17712164	0.14012718
A_24_P271765	-0.4870615	-0.7926502	-0.4464407	-0.58057785	-0.45888615	0.39473438	0.1624217	0.07905817	0.79215384	-0.51537895	-0.21768856	0.08777237	0.7595506	0.13206482	0.49955988	-0.07905769
A_23_P70213	-0.7325754	0.38209724	-0.5880103	0.062425137	0.94058704	0.89870596	0.55722237	-0.24847698	0.9410682	-0.2228508	-0.5811405	-0.66375494	0.24833775	-0.54783535	0.0055007935	-0.0055012703
A_24_P392661	0.11692476	0.17049456	0.45426798	-0.1125617	0.9874406	0.096838474	-0.29821634	0.15406942	0.5139537	-0.41061926	-0.096838474	-0.5291314	0.17447329	-1.2743354	-0.16225767	-0.18980646
A_23_P13907	-0.74678946	0.5695267	0.07819557	0.4683447	3.0988278	-0.68224096	-1.3753653	-1.3782663	0.5968461	-0.71726036	-0.81539154	-0.078195095	3.3295522	0.30774117	0.14063454	-0.5198679
A_23_P326303	-0.1092248	0.39785433	-0.31656122	-0.1026988	-0.9617381	0.53478765	-0.045882225	0.045882702	0.27786827	-0.18062305	-0.26094198	-1.0030184	1.0587826	1.3813872	0.36279583	0.81142044
A_32_P218249	0.19836712	0.24725437	-0.027299881	-0.089027405	-2.4252377	0.29594612	0.3728466	-0.04880619	-0.20742989	0.027299881	0.29240036	0.43192482	-2.0307722	-0.02766037	0.19819355	-0.19058895
A_24_P911255	0.24170923	-0.371603	-0.026098251	-0.16647816	-0.9132509	-0.21739292	-0.49090004	-0.5763464	0.6484699	0.3277521	0.5266633	-0.30080414	0.69951296	1.7057638	1.5687237	0.026098251
A_24_P930868	-0.070884705	-1.1418147	0.5829787	-1.2018814	0.77011347	-0.15488195	-0.50710726	0.57959795	-0.6653733	-1.1527505	0.88955736	-0.4143095	0.3909111	0.070884705	1.8233361	0.3119545
A_23_P18505	-0.34365606	0.24415445	-0.57304716	-0.49045706	0.8523226	0.48959017	0.3969698	0.16560936	0.41797876	0.09489918	-0.14280081	-0.23844671	-0.057667255	-0.50504255	0.057667255	-0.3240466
A_23_P87120	-0.3059101	0.43776512	1.4111972	1.0541925	-0.97255135	0.060865402	-0.060864925	-0.7241578	-1.3635273	-1.2653408	-1.7479706	-1.1996069	2.1641703	1.2998524	0.8797536	0.39295483
A_32_P158496	-0.8792386	-0.597702	-0.28242636	-0.5500488	2.4006743	0.3244524	-0.09728575	0.052326202	-0.017778873	-0.23493624	-0.69407606	0.017778873	2.3850317	0.12262249	0.5705571	0.04320097
A_23_P303671	0.088005066	-0.19384384	0.15091991	0.0025577545	8.038029	-0.1982441	-0.41162777	-0.44210625	-0.8492441	-0.20042133	-0.0025577545	-0.13393688	7.1696653	0.6320152	0.5286279	0.15710354
A_23_P417383	-0.4658904	-1.211349	0.3484826	-0.3954091	-1.7802854	-0.030582905	0.14650679	0.36754656	-0.15453196	0.7742562	0.35104132	0.5568061	-0.8795819	0.28635454	-0.092974186	0.030582905
A_24_P930070	-0.059850693	0.36175442	0.006286621	-0.08489418	-0.71097565	0.5885372	-0.57190704	0.5207076	1.305448	-0.3506689	-0.827199	-0.2834692	0.6722512	2.0094514	0.36600685	-0.0062856674
A_23_P208523	0.4516256	0.20826507	-0.37895513	0.34078956	0.32911992	-0.4654138	-0.19603086	-0.23601031	0.041236162	-0.041236162	0.06513667	-0.5786426	0.3836248	-0.12613845	0.46119905	-0.047492743
A_23_P398530	-0.67166424	1.438519	1.1422663	0.28731441	1.2526608	0.9668822	0.07405138	0.2533903	1.0384684	-1.3222036	-1.7951078	-1.0432596	-0.31139183	-0.51309204	-0.6170969	-0.0740509
A_24_P151727	-0.08147621	0.3674116	-0.034716606	-0.18902874	-0.0060987473	0.0060987473	0.3120098	-0.028966904	0.1674614	0.18292713	0.022907257	0.034487724	-1.0781898	-0.23182678	0.19437885	-0.35799694
A_32_P193347	-0.14035153	0.038759947	0.19766593	0.44609952	-0.59104276	0.095204115	-0.16477561	-0.038759947	-1.8108938	-1.9874704	-1.7190855	-1.4630301	0.8557565	1.72137	0.888571	0.8272493
A_24_P341606	-0.108383656	0.33991337	0.4121909	0.53108263	0.023246765	-0.023246765	-0.6260476	-0.37006426	-0.96021175	-0.5714927	-0.48492575	-0.96643114	1.1172462	1.3472567	0.56308794	0.46233892
A_24_P921683	-0.0382967	-0.30381775	0.0382967	-0.1258192	2.8669977	0.64519215	-0.32019997	-0.621274	0.5892067	-0.34072113	-0.8035059	-0.27213955	2.783781	1.6063867	1.3888931	1.0955081
AT_nB_5	0.24353981	-0.025014877	0.30290508	0.16478729	-0.6103878	-0.0021486282	-0.21191692	-0.21285439	-0.60300255	-0.06428051	-0.5052986	0.0021476746	0.98043203	0.8371978	0.68378973	0.32514572
A_24_P196839	-0.086174965	-0.3484602	0.95334053	-0.17426395	0.12748623	-0.42555332	-0.029824257	-0.67931366	0.21250916	0.029824257	-0.85141087	-0.32387257	1.5095129	0.37928772	0.85694504	1.4518805
A_23_P10211	0.006825924	-0.122270584	-0.45258427	0.017816067	0.93492794	-0.18115139	-0.09306288	0.4773836	-0.30691147	-0.36986113	-0.06555939	0.5899401	0.94160414	0.68295956	1.2970943	-0.006825924
A_23_P106720	0.52145815	0.2752242	-0.621644	0.45519972	0.14922667	0.4286914	0.7407737	-0.06803846	0.6300645	-0.2626872	-0.31404638	-1.1381025	-0.81114197	-0.49436903	-0.5798421	0.06803846
A_23_P203613	0.23760223	0.21185017	0.008275032	0.5049515	-0.42000246	-0.008274555	-0.50782204	-0.4751463	-1.4821353	-1.4716864	-1.4519725	-2.0439215	1.4105568	1.2247233	0.6360836	0.26080465
A_24_P417784	0.46517134	-0.09870672	-0.17988062	0.43751097	0.36038923	0.3144374	0.60024977	0.24703455	0.04962969	-0.24067736	0.123889446	-0.04962969	-1.1499248	-0.7151208	-0.37587976	-0.57039213
A_23_P12730	1.353066	0.37520933	0.72273016	1.3975053	-1.4506307	0.01849413	0.22706556	-0.3120265	-0.57652235	-0.5984225	-0.01849413	1.2776818	-1.9410019	-1.1801543	0.3617072	-1.0665741
A_24_P202857	-0.493474	-1.6268001	-0.07682085	0.23687553	0.6614189	-0.5547762	0.10030508	0.07682085	-0.2460084	-0.8494563	-2.138886	-1.6240191	1.6303349	0.7695999	0.5043225	0.24272013
A_23_P38254	-0.034319878	-0.60058975	0.40155888	-0.24780846	-1.9733648	0.048345566	0.24847126	0.27826786	-0.26157475	0.4677229	0.24292946	0.2533903	-0.9166641	0.034319878	-0.10760689	-0.06800175
A_23_P128503	-0.69469976	-0.26169682	0.79394484	0.5084133	-0.360322	0.11297798	-0.38080168	-0.80920696	-0.36469936	0.3069811	-0.40734434	-0.003788948	1.2563257	0.45852327	0.42468786	0.003789425
A_32_P649	0.10813618	5.7315826E-4	0.059444427	0.145751	-0.9133539	0.18356514	0.1193409	-0.31320286	-5.7315826E-4	-0.1672287	-0.036064148	-0.12793636	-1.4828129	-0.5470724	0.40479755	0.038484573
A_24_P83183	0.007441044	-0.63289213	-0.007441044	-0.44468737	-0.656095	0.40453863	0.92396975	0.5818238	0.22622538	0.523294	0.61372423	0.23992491	-1.4212804	-0.44985914	-0.26589823	-0.38637018
A_24_P713267	0.090753555	-0.16027546	0.18157816	-0.0017604828	-0.940526	0.07333088	0.02944374	-0.5492201	-0.81232834	-0.23670673	-0.67842674	-0.17273903	0.67520046	0.48897457	0.37871456	0.0017595291
A_23_P213810	-0.15933704	0.003288269	0.24882507	0.2475853	-1.1308489	0.26743126	-0.11113691	0.23476219	-0.003288269	0.034740448	-0.26146507	-0.81750774	0.49099493	-0.08012724	0.060026646	-0.27755213
A_23_P55388	-0.053739548	0.27048016	0.56261253	-0.021235466	-1.9216671	0.19343853	0.02123499	0.30763817	0.17179108	-0.25853682	0.31499338	-0.15647078	-1.0919685	-0.23928118	-0.61834145	0.18503618
A_24_P740244	0.5960822	-0.93464565	1.2296467	1.3714728	-0.9393501	0.117593765	-0.5868392	0.8550544	-0.91494083	-1.0151501	-0.71779156	-0.34539843	-0.117593765	0.8229666	1.1615076	1.0493307
A_24_P84268	-0.25506544	0.13275957	-0.18827486	0.19726896	0.21171618	-0.5169234	-0.7517724	-0.46399546	-1.6208062	-0.25894117	0.5727868	1.1348062	0.8097329	1.2031417	-0.07877588	0.07877588
A_24_P216253	0.1790123	-0.18611526	-0.3140316	0.30580997	1.5118732	-0.3471012	0.069767	-0.32592964	0.13683319	-0.6709318	-0.027915955	0.027915955	0.24350071	-0.8654332	0.8528137	-0.4238844
A_23_P339053	7.90596E-4	0.023950577	-0.121707916	-0.5365648	0.54942036	-0.30194283	-0.5266838	-0.39451504	-7.90596E-4	0.12677574	-0.38239765	0.27049828	1.1355305	0.22638607	-0.36707115	0.041869164
A_24_P581311	-0.0036149025	0.11465502	0.18738413	0.0036144257	-0.38803673	0.18272924	-0.18927002	-0.21897888	-0.58321095	-1.3989449	-0.7777734	-1.6046143	0.115186214	1.352808	0.48989916	1.1691227
A_24_P136683	0.28080583	0.79262805	0.023078203	0.33319783	1.1803033	-0.31275535	-0.33990693	-0.1563294	-0.023078203	-0.77803063	-0.269068	-0.6931069	0.6361611	0.38704228	0.14982438	-0.14362788
A_24_P702749	-0.5311694	0.44456053	1.3780398	0.9251847	-1.1407428	0.47319555	-0.46191883	-0.55037975	-0.035738945	0.73349714	1.1605177	-1.0442533	-0.15277195	0.45770264	-0.99229383	0.035738945
A_23_P350698	-0.2812252	0.5037823	-0.059243202	1.0495772	1.5161605	0.059243202	-0.26147747	-0.55153465	-0.2426672	-0.4892683	-1.132699	-0.63382435	2.1616268	1.7571716	0.8097453	1.1742849
A_23_P127805	0.22081256	-0.09884143	0.9972117	0.80814624	-0.21793485	-0.33186698	-0.31136346	0.09884143	-0.4037516	-1.105036	0.2103293	-0.76789975	0.23561311	0.21155286	0.64128137	-0.29208446
A_32_P191417	0.05051422	-0.21366596	0.15577126	-0.05051422	-1.0232124	-0.35024452	-0.6329222	1.0266542	0.5266452	-0.2815447	-0.46039486	-0.23230457	0.57892704	0.41322613	2.1074224	1.5302849
A_24_P366735	0.068874836	0.39718103	0.117387295	0.61770964	0.11650133	-0.49654293	-0.6729517	-0.32947874	-0.57040834	-0.58286905	-0.062990665	-0.670629	0.6826358	1.0741429	-0.27798653	0.062990665
A_24_P182858	0.30573583	0.14393258	-0.1345408	0.6821921	1.2864735	-1.0061367	-0.97532296	-0.57095885	-0.94710994	-1.0647018	0.14891076	-0.64118457	1.2660391	0.97327065	-0.023893118	0.023893118
A_32_P113954	0.052567482	-0.22197342	0.16339302	-0.052568436	-0.9739189	0.7033434	-0.10255909	1.2638531	0.72173023	-0.27424812	-0.73604965	-0.22978973	0.5756912	0.41579628	0.27866364	-0.07717514
A_23_P58706	-0.87397385	-1.192914	0.5997925	-1.7896824	-2.749977	0.70180464	0.9340782	0.71841764	0.57540226	-0.9678459	0.84279776	0.0045580864	-1.0615673	-0.28811646	-0.0045576096	0.33274364
A_32_P227724	0.23472834	-2.0301905	1.1768484	1.6216049	2.3406997	-1.6734028	-2.3962984	1.6715603	-1.423173	-0.80900097	0.7287631	0.23623371	0.94102764	-0.60360575	-0.23472881	-0.43290234
A_23_P319005	-0.22987795	0.9199362	0.46006918	0.46096945	-0.94690466	0.09164238	-0.33937836	0.043125153	-0.30939913	-0.8077111	-0.6744499	-0.043124676	0.34208012	0.88242483	0.08958721	-0.08893013
A_24_P333630	1.079318	0.23068142	0.4732046	-0.34277916	-2.7327976	-0.35539293	-0.17092419	0.040423393	-0.040423393	-0.53020334	-0.19578886	0.078270435	-0.8797169	0.5655775	0.12969065	0.5503292
A_32_P3342	-0.29308605	-0.60590553	-0.17248535	1.5361595	1.2404547	-0.68261147	-0.97524166	2.8853374	-0.86451244	-0.6042347	1.0718627	0.7205143	0.2276082	0.0800848	-0.08008528	0.61115885
A_24_P910169	-0.06760168	0.15451479	-0.76809645	0.863091	3.1829228	0.06760168	-0.25623083	0.12068701	0.281528	-0.13128424	-0.32950354	-0.8008299	2.367354	-0.3597679	0.15564585	-0.22780943
A_23_P417261	-0.741359	-1.6629512	0.8178508	1.8776724	-0.5072024	0.0350945	0.43669963	0.30234504	-0.24696946	0.7382705	-0.06960225	0.8929088	-0.08811784	-0.2109468	0.46405292	-0.0350945
A_32_P25371	-0.06917143	-0.13080263	-0.13661718	0.04777956	-0.97599936	-0.036280155	4.6777725E-4	0.1403203	-0.43732786	0.14386415	-4.6777725E-4	0.46172953	-0.23729467	0.5777097	0.57744455	0.07995272
A_24_P940434	-0.881516	-0.6750188	1.2083883	2.5483785	-1.6283822	0.1472044	0.14240408	0.62848186	-0.0994792	-0.035146236	-0.48617315	-1.1638122	1.3092704	0.035146236	1.3230767	-0.09752083
A_24_P633543	-0.04121113	-0.5037861	0.17215157	-0.2915368	-0.44688416	0.04121113	0.086378574	0.2636547	0.26741457	-0.0988183	0.8210225	-0.38965368	0.2461009	-0.14975548	-0.5397134	0.44792032
A_23_P26223	0.1841507	0.70805836	-0.30954552	0.06563091	0.75494766	-0.63167095	-0.30769825	-0.03818798	0.01619339	0.038445473	-0.09173012	-0.03020382	0.37498856	0.059381485	-0.40144444	-0.01619339
A_23_P201863	0.17561698	0.2396872	-0.12655568	0.12655568	-1.8621619	0.9529369	0.74760413	0.34895587	0.9805124	-0.36557794	-0.45011353	-0.87740064	-1.9059408	-0.32692266	0.40468192	-0.15393758
A_24_P761705	-0.010361195	0.44867516	0.010361195	0.7019887	-0.4839754	-0.18770838	-0.18949461	0.19744968	-1.3876243	-1.2929206	-0.90387964	-0.5727248	1.0171118	1.4825273	0.9647465	1.0906391
A_23_P161983	0.17690516	1.0125313	0.41808605	1.6540799	-0.68493986	-0.17690516	-0.22975206	-0.23293781	-1.1705847	-0.4189682	-0.28820133	-1.313868	1.1309633	1.8512058	1.3296995	1.0132465
A_24_P136911	-0.27447796	-0.6186209	-0.25436115	0.9780326	0.5853691	-0.50502205	-0.4518137	0.25436163	0.5289278	-0.6225977	-1.0622549	-0.5392151	0.5579953	0.38628578	2.377771	1.2823205
A_24_P58204	0.12527609	0.43192387	0.66616774	1.1308537	-0.34968185	-0.12527609	-0.47355747	-0.17387009	-1.8796906	-1.5189714	-0.9482231	-1.6082716	1.7285008	1.7848992	1.0523849	0.93779755
A_24_P485742	0.3894477	-1.2506318	0.43359137	0.112193584	-0.85761976	-0.54237604	-0.1808114	0.50680494	-0.5736108	0.05769396	1.004147	0.9336829	-1.7392077	-0.05769396	0.77954435	-0.29731703
A_23_P343398	-0.0013046265	-0.5420513	0.0013046265	1.1239033	-0.6641321	0.6133847	0.81159353	-0.1621728	0.19680834	-0.14630032	1.1584725	-0.4237485	-0.29809666	-0.02340126	0.34060574	0.44287252
A_24_P623553	-0.4418354	-0.002820015	-0.84936094	0.16382217	-0.6672087	0.7584548	0.56485033	-1.5407772	0.3453231	0.15845585	-0.5332761	-0.65184975	0.59821177	0.0028204918	0.03265047	-0.3126831
A_24_P282597	-0.61086416	-1.3306684	0.4225111	-2.3205128	0.9178219	0.9051008	0.6164074	0.6440582	0.09523153	-1.3816476	-0.9278059	-0.7789612	0.87461233	-1.9548464	-0.09523153	0.23252964
A_23_P84952	0.034588814	0.31465912	-0.811924	-0.099191666	1.065465	0.19159031	0.24733067	-0.034588814	0.041532516	-0.44316578	-0.21426201	-0.6947851	0.37993813	-0.447793	0.09094429	-0.78744125
AT_nX_5	0.17757416	-0.099411964	0.22962952	0.11412907	-0.6187048	-0.030982018	-0.23844719	-0.2402029	-0.7458286	0.030981064	-0.5724945	-0.044216156	1.1802964	0.8180251	0.6739335	1.2113609
A_24_P124558	-0.013510704	-0.33403778	0.01350975	0.5638428	3.9981918	-0.15657997	1.3118882	-0.40981197	-0.9915838	-0.3196516	-0.7957287	-0.25346184	2.5888958	0.6364274	0.5378895	0.7931428
A_32_P164593	-0.40689182	-0.4315033	0.30433846	-0.8061924	-5.0171175	0.26888084	0.4031725	0.15193272	-0.059345245	-0.16783047	0.51606655	0.3715849	-5.3724566	-0.4082203	0.0958786	0.059345245
A_23_P12386	-0.28425026	-0.60036564	1.0064201	-0.38863945	-1.0585985	0.77685976	-0.6882124	1.0696688	-0.68368053	0.10469818	-1.0649195	0.23310184	0.5497236	0.35934258	0.25988007	-0.10469818
A_23_P65320	-0.08762407	-0.91602945	0.2101531	-0.5216341	-1.4627023	0.6217036	0.7079644	0.4092946	0.08762407	-0.13700533	0.21358156	-0.11821318	-1.4984136	-0.50036526	0.4762721	0.27199602
A_23_P203891	-0.15635014	-0.03376293	0.35125923	0.1279974	-0.5813427	-0.014625549	-0.123251915	-6.465912E-4	0.48621178	0.14696503	-0.15020275	6.465912E-4	-0.22283363	0.011710167	0.15172672	0.16491508
A_23_P415706	-0.58120394	-0.89099836	-0.54617834	-0.67765474	9.567898	0.8200164	1.1481133	0.5606904	1.3653326	-0.8738427	-0.5494151	-0.8106551	8.950911	0.050323963	-0.050323963	1.7024827
A_23_P131036	-0.46606302	-0.8704562	-0.3036623	-0.6192894	-0.44155788	0.09273815	-0.2654624	0.34856462	-0.09273863	0.8722601	-0.75136995	0.09625721	0.102321625	0.33844137	0.11767769	0.13905668
A_23_P365412	-0.7965498	0.21253538	0.9136753	-0.88911724	0.6480236	0.64627695	-0.021363258	-0.23050976	0.9445934	-0.50999784	0.20829105	0.24756432	0.021363258	-0.17473888	-0.05795288	-0.3752842
A_32_P209489	-0.6395731	0.022817612	-0.5990629	-0.7304678	-0.9418068	0.9216771	-0.28985405	0.121785164	-0.6860008	-0.35977554	0.16607714	0.35139894	0.69044304	-0.022817135	0.6226196	0.9087305
A_23_P1682	-0.07406855	-0.04995346	1.0966368	-0.36914682	-3.1287184	0.49134302	0.73983765	0.049952984	-0.28666782	0.89690924	0.39480305	-0.22620106	-1.5165958	0.3835082	1.0434575	-0.11970806
A_24_P270044	0.6580863	0.35360956	-0.05265808	0.7473521	2.517427	-0.049151897	0.096355915	-0.46980476	-0.085740566	-0.10814524	-0.14003897	-1.2360797	2.3665433	0.049151897	0.545568	-0.5633302
A_23_P367816	-0.687407	-0.22619677	-0.06594515	-0.5411601	1.8739057	0.668056	0.16020536	-0.27050543	0.46963644	0.05306673	-1.0918345	-0.4824443	1.9725633	0.46237516	-0.013188839	0.013188839
A_24_P114103	0.11809969	0.20210314	-0.11388302	0.09353876	-0.06065607	-0.43895578	-0.2675166	0.30702066	-0.21316385	0.3857417	0.06065607	0.3719697	-0.5263858	0.22290039	-0.36521673	-0.34035826
A_23_P348063	-0.19194531	-0.253402	-0.12598825	-0.24163556	1.3534553	0.38372397	0.066777945	0.17701411	0.10234523	-0.23527932	-0.53906846	-0.6025369	0.99339557	0.4767158	0.38686872	-0.066777945
A_24_P145414	0.24046898	-0.051585197	0.29234314	0.15535164	-0.58947086	-0.020241737	-0.2262888	-0.25192642	-0.7076788	-0.04367447	-0.5308037	0.020241737	1.0231099	0.82192326	0.71903324	0.86761045
A_32_P115446	-0.39339948	-0.86906266	-0.012589693	-1.019419	-1.1421287	0.41495204	0.50563216	0.48813128	0.67589164	0.07518649	0.5530908	0.4632032	-1.1608994	-0.0035188198	-0.36268735	0.0035188198
A_23_P252062	-0.62237453	-0.12981033	-0.48683882	-0.18634415	7.6605473	0.35517454	-0.1769743	-0.7117777	0.052937508	-0.047626972	-0.3818078	0.34010172	7.9267817	0.22738934	0.047626495	0.21588421
A_24_P294765	-0.16154814	0.49243164	0.57974815	0.94065094	0.7757907	-0.4367094	-0.43929672	-0.49938202	-0.2786932	-1.2017965	-0.91886616	-0.1621399	1.0956974	1.6271234	0.16154861	1.1093383
A_23_P76882	-0.026694298	0.29267597	-0.10314846	0.13643074	-1.7428303	0.07486153	-0.005722046	0.005722046	0.2849779	0.063420296	-0.15895367	0.40824413	-1.8712673	-0.015162468	0.3649912	-0.17191029
A_24_P212851	1.2213073	-0.23111868	-1.0135503	1.2025266	-1.4322124	1.7443404	1.7066865	0.957314	1.4404302	0.52849436	-0.12605524	-1.2023492	-2.2787151	-0.3764243	-0.096628666	0.096628666
A_23_P134113	-5.607605E-4	-0.2940178	0.94655323	0.23924065	-3.852665	-0.34717464	-0.48049355	-0.08882809	-0.7427759	0.063302994	5.607605E-4	0.12435627	-1.503706	0.5257435	0.59857273	0.2796278
[truncated: 39,095 more rows]
